# Supplementary material for: Transcriptional and Metabolic Insights into the Differential Physiological Responses of Arabidopsis to Optimal and Supraoptimal Atmospheric CO2
Source: PLoS One. 2012 Aug 20;7(8):e43583. doi: 10.1371/journal.pone.0043583 (PMC3423350; doi:10.1371/journal.pone.0043583)
Supplement: Table S1 — A. Corresponding genes of the development-responsive transcripts with 2 fold or more changes in their signals in mixed effect model analysis (p-value ≤0.001). B. Corresponding genes of the CO2 regulated transcripts. CO2 only or development independent and dependent CO2 regulated transcripts with 2 fold or more changes in their signals in mixed effect model analysis (p-value ≤0.001) were presented. (XLSX) [file pone.0043583.s001.xlsx]

## Sheet: Table S1A and B
Table S1A. Transcriptional response to the early and late vegetative growth stages due to age. Levels of transcripts that showed at least 2 fold increase or decrease during any treatment and were significant at p > 0.001 presented.
		Early vegetative stage (1.09 life stage)			Late vegetative stage (1.14 life stage)			Age affect on CO2 response
		CO2 levels			CO2 levels			400	1200	4000	ppm CO2
AffyID	MIPS	1200 vs 400	4000 vs 400		1200 vs 400	4000 vs 400		1.14/1.09	1.14/1.09	1.14/1.09	Life stages	P values of the mixed model analysis
Photosynthesis												Age	CO2	Age and CO2 Interaction		Mapman Bin Code	description
264069_at	At2g28000	1.19205	1.04655		1.04297	1.22868		0.546727	0.478349	0.641872	calvin cyle.rubisco interacting	1.52e-06	0.281569	0.218128	Age Regulated Only	1.3.13	CPN60A (chloroplast / 60 kDa chaperonin alpha subunit); ATP binding / protein binding / unfolded protein binding
Carbohydrate metabolism
255070_at	At4g09020	1.23858	0.936214		1.00664	0.993592		1.97043	1.60144	2.09119	synthesis.starch.debranching	9.34e-05	0.686289	0.756498	Age Regulated Only	2.1.2.4	ATISA3/ISA3 (ISOAMYLASE 3); alpha-amylase
260343_at	At1g69200	1.11753	1.36449		0.89109	1.12324		0.562678	0.448666	0.463192	degradation.sucrose.fructokinase	1.1e-05	0.107235	0.372262	Age Regulated Only	2.2.1.1	pfkB-type carbohydrate kinase family protein
254101_at	At4g25000	1.03786	1.4862		1.49219	1.3006		2.8758	4.13467	2.51667	degradation.starch.starch cleavage	8.46e-07	0.083067	0.135267	Age Regulated Only	2.2.2.1	AMY1 (ALPHA-AMYLASE-LIKE); alpha-amylase
246114_at	At5g20250	1.08986	0.757941		1.03457	1.13523		0.497257	0.472031	0.744782	raffinose family.raffinose synthases.putative	4.63e-05	0.274889	0.0921156	Age Regulated Only	3.1.2.2	DIN10 (DARK INDUCIBLE 10); hydrolase, hydrolyzing O-glycosyl compounds
261294_at	At1g48430	1.26356	0.887481		0.712123	1.11295		2.14268	1.20758	2.68704	others	0.000560237	0.629632	0.0814033	Age Regulated Only	3.5	dihydroxyacetone kinase family protein
Glycolysis
253987_at	At4g26270	0.812461	0.967512		1.19376	0.882096		1.63213	2.39812	1.48804	PPFK	1.04e-05	0.395878	0.0542047	Age Regulated Only	4.4	phosphofructokinase family protein
Gluconeogenesis/glyoxylate cycle
245528_at	At4g15530	0.69215	0.823751		1.19788	0.856648		1.51488	2.62175	1.57537	pyruvate dikinase	0.000207854	0.419742	0.129324	Age Regulated Only	6.5	PPDK (PYRUVATE ORTHOPHOSPHATE DIKINASE); kinase/ pyruvate, phosphate dikinase
TCA cycle
250339_at	At5g11670	1.01602	1.19225		1.23955	1.09402		1.6818	2.0518	1.54323	transformation.other organic acid transformaitons.malic	2.68e-05	0.353854	0.327124	Age Regulated Only	8.2.10	ATNADP-ME2 (NADP-MALIC ENZYME 2); malate dehydrogenase (oxaloacetate-decarboxylating) (NADP+)/ malic enzyme/ oxidoreductase, acting on NADH or NADPH, NAD or NADP as acceptor
Mitochondrial electron transport/ATP synthesis
258452_at	At3g22370	0.669369	0.706619		1.20684	0.844982		1.48957	2.68561	1.78124	alternative oxidase	3.42e-05	0.14367	0.0753204	Age Regulated Only	9.4	AOX1A (alternative oxidase 1A); alternative oxidase
Cell wall
254185_at	At4g23990	0.991943	0.965038		1.25427	0.781367		1.66132	2.10067	1.34513	cellulose synthesis.cellulose synthase	0.000758225	0.144852	0.178081	Age Regulated Only	10.2.1	ATCSLG3 (Cellulose synthase-like G3); transferase/ transferase, transferring glycosyl groups
Lipid metabolism
254998_at	At4g09760	0.826438	0.771622		1.09458	0.886286		1.51892	2.01174	1.74464	Phospholipid synthesis.choline kinase	1.33e-05	0.177843	0.349238	Age Regulated Only	11.3.2	choline kinase, putative
Nirogen sulfur and amino acid metabolism
249581_at	At5g37600	0.65544	1.0783		1.27143	0.784729		3.15716	6.12431	2.29762	N-metabolism.ammonia metabolism.glutamine synthase	1.23e-05	0.401622	0.0824242	Age Regulated Only	12.2.2	ATGSR1 (Arabidopsis thaliana glutamine synthase clone R1); glutamate-ammonia ligase
249112_at	At5g43780	0.780351	0.822299		1.25096	0.812241		1.55353	2.49042	1.53453	S-assimilation.APS	7.2e-05	0.12648	0.0674412	Age Regulated Only	14.1	APS4
267237_s_at	At2g44040;At3g59890	0.992725	1.07529		0.803516	1.2341		0.527205	0.426722	0.605069	amino acid metabolism.synthesis.aspartate family.lysine.dihydrodipicolinate reductase	4.97e-05	0.309185	0.756901	Age Regulated Only	13.1.3.5.2	[AT2G44040, dihydrodipicolinate reductase family protein];[AT3G59890, dihydrodipicolinate reductase family protein]
254535_at	At4g19710	1.15009	0.94163		0.858547	1.06549		0.669159	0.499532	0.757177	amino acid metabolism.synthesis.aspartate family.homoserine.bifunctional aspartate kinase/homoserine dehydrogenase	0.000121096	0.906797	0.142788	Age Regulated Only	13.1.3.6.1.10	AK-HSDH/AK-HSDH II; aspartate kinase/ homoserine dehydrogenase
Secondary metabolism
252117_at	At3g51430	0.757405	0.940658		1.01928	0.948429		1.65129	2.22222	1.66493	N alkaloid-like	6.09e-05	0.775498	0.554768	Age Regulated Only	16.4.1	YLS2 (yellow-leaf-specific gene 2); strictosidine synthase
Hormone metabolism
248466_at	At5g50720	0.860293	0.781118		0.711028	0.98394		1.87212	1.5473	2.35822	abscisic acid.induced-regulated-responsive-activated	1.89e-05	0.0969691	0.155333	Age Regulated Only	17.1.3	ATHVA22E (Arabidopsis thaliana HVA22 homologue E)
253874_at	At4g27450	1.20856	1.09074		0.879349	1.22243		1.92112	1.39782	2.15306	auxin.induced-regulated-responsive-activated	9.07e-05	0.304214	0.161159	Age Regulated Only	17.2.3	similar to unknown protein [Arabidopsis thaliana] (TAIR:AT3G15450.1); similar to unknown [Glycine max] (GB:AAG00940.1); contains domain no description (G3D.3.60.20.10); contains domain N-terminal nucleophile aminohydrolases (Ntn hydrolases) (SSF56235)
251342_at	At3g60690	0.724437	1.06828		1.03388	1.04034		1.44088	2.05636	1.40319	auxin.induced-regulated-responsive-activated	1.07e-06	0.092664	0.0720357	Age Regulated Only	17.2.3	auxin-responsive family protein
267461_at	At2g33830	1.0352	0.630383		0.78066	0.666782		4.45132	3.35681	4.70834	auxin.induced-regulated-responsive-activated	0.000101083	0.326584	0.594542	Age Regulated Only	17.2.3	dormancy/auxin associated family protein
253579_at	At4g30610	1.08162	1.05595		1.03634	0.986506		0.52116	0.499344	0.486884	brassinosteroid.signal transduction.other	2.54e-07	0.724394	0.843693	Age Regulated Only	17.3.2.99	BRS1 (BRI1 SUPPRESSOR 1)
257053_at	At3g15210	0.839372	1.18012		1.63864	1.28681		1.7457	3.408	1.90353	ethylene.signal transduction	4.33e-05	0.189176	0.0635152	Age Regulated Only	17.5.2	ATERF-4/ATERF4/ERF4/RAP2.5 (ETHYLENE RESPONSIVE ELEMENT BINDING FACTOR 4); DNA binding / protein binding / transcription factor/ transcriptional repressor
249125_at	At5g43450	0.773281	0.811312		0.718651	0.791897		2.47294	2.29823	2.41376	ethylene.synthesis-degradation	7.26e-05	0.199885	0.642309	Age Regulated Only	17.5.1	2-oxoglutarate-dependent dioxygenase, putative
261768_at	At1g15550	0.945727	0.813939		0.729356	1.07296		0.438168	0.33792	0.577607	gibberelin.synthesis-degradation.GA3 oxidase	2.41e-05	0.614918	0.325842	Age Regulated Only	17.6.1.12	GA4 (GA REQUIRING 4); gibberellin 3-beta-dioxygenase
255895_at	At1g18020;At1g17990	1.02052	0.699608		0.825695	1.00179		1.69626	1.37243	2.42891	jasmonate.synthesis-degradation.12-Oxo-PDA-reductase	6.8e-05	0.527837	0.136787	Age Regulated Only	17.7.1.5	[AT1G18020, 12-oxophytodienoate reductase, putative];[AT1G17990, 12-oxophytodienoate reductase, putative]
Stress
248337_at	At5g52310	0.678734	0.877102		1.12027	0.963027		2.24076	3.69843	2.46027	abiotic.cold	1.29e-06	0.868633	0.294502	Age Regulated Only	20.2.2	COR78 (COLD REGULATED 78)
263497_at	At2g42540	1.01557	0.749392		0.785376	1.04931		2.73484	2.11496	3.82935	abiotic.cold	2.09e-05	0.619192	0.29449	Age Regulated Only	20.2.2	COR15A (COLD-REGULATED 15A)
253125_at	At4g36040	0.671001	0.712478		1.12449	0.951998		1.44252	2.41743	1.92747	abiotic.heat	0.000102761	0.499724	0.263985	Age Regulated Only	20.2.1	DNAJ heat shock N-terminal domain-containing protein (J11)
248582_at	At5g49910	1.12637	0.933868		0.704369	1.03454		0.657836	0.411374	0.72875	abiotic.heat	0.000132197	0.934072	0.109111	Age Regulated Only	20.2.1	cpHSC70-2 (HEAT SHOCK PROTEIN 70-7); ATP binding / unfolded protein binding
261901_at	At1g80920	1.06124	0.685593		1.04497	1.14007		1.682	1.65623	2.797	abiotic.heat	2.54e-06	0.703523	0.0885174	Age Regulated Only	20.2.1	J8; heat shock protein binding / unfolded protein binding
261144_s_at	At1g19660;At1g75380	0.971131	0.674151		0.991088	0.900433		1.59059	1.62327	2.12448	abiotic.touch/wounding	6.13e-05	0.172999	0.787242	Age Regulated Only	20.2.4	[AT1G19660, wound-responsive family protein];[AT1G75380, wound-responsive protein-related]
261749_at	At1g76180	1.29953	1.17085		0.910788	1.29371		1.95225	1.36825	2.1571	abiotic.unspecified	1.41e-05	0.086665	0.0574798	Age Regulated Only	20.2.99	ERD14 (EARLY RESPONSE TO DEHYDRATION 14)
260568_at	At2g43570	0.448248	0.755723		0.852702	0.859788		3.23029	6.14498	3.67512	biotic	0.000209558	0.603983	0.959481	Age Regulated Only	20.1	chitinase, putative
258000_at	At3g28940	1.21959	1.05572		1.02069	1.11792		1.92032	1.60714	2.03346	biotic	8.34e-06	0.600653	0.531918	Age Regulated Only	20.1	avirulence-responsive protein, putative / avirulence induced gene (AIG) protein, putative
258537_at	At3g04210	0.832593	0.773423		1.10476	0.765254		1.63053	2.16354	1.61331	biotic.PR-proteins	0.000532336	0.191664	0.404825	Age Regulated Only	20.1.7	disease resistance protein (TIR-NBS class), putative
258897_at	At3g05730	0.932376	0.947485		0.93177	1.32251		0.426399	0.426122	0.595173	biotic.PR-proteins.plant defensins	0.000106454	0.707524	0.65722	Age Regulated Only	20.1.7.12	Encodes a defensin-like (DEFL) family protein.
Redox
260943_at	At1g45145	0.797835	0.957584		1.06815	1.12557		2.69775	3.61176	3.17101	thioredoxin	7.77e-06	0.861358	0.792123	Age Regulated Only	21.1	ATTRX5 (thioredoxin H-type 5); thiol-disulfide exchange intermediate
258534_at	At3g06730	1.0152	1.03266		0.715219	0.877626		0.706732	0.4979	0.600632	thioredoxin	2.18e-05	0.456658	0.372454	Age Regulated Only	21.1	thioredoxin family protein
253382_at	At4g33040	1.04285	1.072		1.36542	0.999465		2.03176	2.6602	1.89428	glutaredoxins	0.000353201	0.400134	0.412437	Age Regulated Only	21.4	glutaredoxin family protein
264809_at	At1g08830	0.900954	1.19501		1.04096	0.833229		2.63417	3.04352	1.83669	dismutases and catalases	4.76e-05	0.889785	0.364917	Age Regulated Only	21.6	CSD1 (copper/zinc superoxide dismutase 1); copper, zinc superoxide dismutase
Nucleotide metabolism
267421_at	At2g35040	1.27351	1.20065		0.922711	1.20679		0.667219	0.483428	0.670629	synthesis.purine.AICAR transformylase and IMP synthase	1.27e-06	0.0580056	0.0573277	Age Regulated Only	23.1.2.9	AICARFT/IMPCHase bienzyme family protein
C1-metabolism
246595_at	At5g14780	0.888431	0.869644		1.20954	1.18703		1.60352	2.18308	2.18874	formate dehydrogenase	1.98e-05	0.774953	0.32847	Age Regulated Only	25.10	FDH (FORMATE DEHYDROGENASE); NAD binding / cofactor binding / oxidoreductase, acting on the CH-OH group of donors, NAD or NADP as acceptor
Miscelleneous
247362_at	At5g63140	1.03967	1.2462		0.885571	0.81606		0.756454	0.644331	0.495354	acid and other phosphatases	2.99e-05	0.613237	0.0790955	Age Regulated Only	26.13	ATPAP29/PAP29 (purple acid phosphatase 29); acid phosphatase/ protein serine/threonine phosphatase
256100_at	At1g13750	0.872453	1.06319		1.00481	0.841345		2.00941	2.31426	1.59013	acid and other phosphatases	4.79e-06	0.687375	0.221958	Age Regulated Only	26.13	calcineurin-like phosphoesterase family protein
262830_at	At1g14700	0.999346	1.01765		1.05831	0.871268		0.515763	0.546195	0.441573	acid and other phosphatases	1.05e-05	0.898814	0.787428	Age Regulated Only	26.13	ATPAP3/PAP3 (purple acid phosphatase 3); acid phosphatase/ protein serine/threonine phosphatase
251625_at	At3g57260	0.56968	1.12414		1.01405	0.749138		3.01362	5.36435	2.00831	beta 1,3 glucan hydrolases	0.000232339	0.777678	0.337145	Age Regulated Only	26.4	BGL2 (PATHOGENESIS-RELATED PROTEIN 2); glucan 1,3-beta-glucosidase/ hydrolase, hydrolyzing O-glycosyl compounds
249718_at	At5g35740	1.18571	0.940832		0.842496	1.03654		0.615128	0.437073	0.677703	beta 1,3 glucan hydrolases	0.000761202	0.874102	0.33671	Age Regulated Only	26.4	glycosyl hydrolase family protein 17
252629_at	At3g44970	1.12465	0.829035		1.24521	1.27508		0.491958	0.544692	0.756648	cytochrome P450	1.01e-05	0.126171	0.0698799	Age Regulated Only	26.10	cytochrome P450 family protein
246620_at	At5g36220	1.09157	1.17876		1.31063	1.33795		2.0056	2.40808	2.27645	cytochrome P450	0.000157138	0.355036	0.632522	Age Regulated Only	26.10	CYP81D1 (CYTOCHROME P450 91A1); oxygen binding
267500_s_at	At2g45510;At2g44890	1.17838	1.29539		0.877382	1.05885		3.03657	2.26093	2.48208	cytochrome P450	2.71e-05	0.610654	0.700632	Age Regulated Only	26.10	[AT2G45510, CYP704A2 (cytochrome P450, family 704, subfamily A, polypeptide 2); oxygen binding];[AT2G44890, CYP704A1 (cytochrome P450, family 704, subfamily A, polypeptide 1); oxygen binding]
255517_at	At4g02290	0.84085	1.01343		0.840426	0.789457		0.631189	0.63087	0.491693	gluco-, galacto- and mannosidases	0.000301991	0.434312	0.570532	Age Regulated Only	26.3	glycosyl hydrolase family 9 protein
254549_at	At4g19880	1.25796	1.13678		0.921207	0.975787		2.10579	1.54207	1.80757	glutathione S transferases	3.55e-06	0.932631	0.33587	Age Regulated Only	26.9	similar to unknown protein [Arabidopsis thaliana] (TAIR:AT5G45020.1); similar to Glutathione S-transferase, C-terminal-like [Medicago truncatula] (GB:ABC75353.1); contains InterPro domain Thioredoxin-like fold; (InterPro:IPR012336); contains InterPro doma
258034_at	At3g21300	1.54177	1.22881		1.01821	1.37808		0.611904	0.404112	0.686234	misc2	0.000373621	0.154151	0.136688	Age Regulated Only	26.1	RNA methyltransferase family protein
262573_at	At1g15390	1.25495	1.24286		0.827528	1.01803		0.744568	0.490978	0.609876	misc2	3.4e-05	0.376376	0.132332	Age Regulated Only	26.1	PDF1A (PEPTIDE DEFORMYLASE 1A); peptide deformylase
256288_at	At3g12270	1.29998	1.06783		0.96664	1.24697		0.590422	0.439027	0.689476	O- methyl transferases	0.000131629	0.429718	0.195125	Age Regulated Only	26.6	methyltransferase
261453_at	At1g21130	0.810741	0.972297		1.32543	1.12418		1.67116	2.73208	1.9322	O- methyl transferases	0.000186322	0.747144	0.300486	Age Regulated Only	26.6	O-methyltransferase, putative
266687_at	At2g19670	1.31212	1.29558		0.733913	1.1599		0.740926	0.414425	0.663333	O- methyl transferases	0.000240709	0.224299	0.125158	Age Regulated Only	26.6	protein arginine N-methyltransferase, putative
265119_at	At1g62570	1.22762	1.05994		1.02778	1.32014		1.6348	1.36868	2.03612	oxidases - copper, flavone etc.	1.77e-05	0.122823	0.0737517	Age Regulated Only	26.7	flavin-containing monooxygenase family protein / FMO family protein
267472_at	At2g02850	1.03989	1.24046		0.908454	0.709148		2.20103	1.92282	1.25829	plastocyanin-like	0.00021014	0.596475	0.102993	Age Regulated Only	26.19	ARPN (PLANTACYANIN); copper ion binding
263847_at	At2g36970	1.0432	1.10163		1.38162	1.20802		1.60953	2.13167	1.76496	UDP glucosyl and glucoronyl transferases	0.000156257	0.279482	0.381249	Age Regulated Only	26.2	UDP-glucoronosyl/UDP-glucosyl transferase family protein
RNA
254080_at	At4g25630	0.977246	1.29365		0.904386	0.99441		0.580096	0.536846	0.445912	processing	1.27e-06	0.0622091	0.125366	Age Regulated Only	27.1	FIB2 (FIBRILLARIN 2)
263864_at	At2g04530	1.35842	1.30772		0.783927	1.02839		0.856147	0.494072	0.673274	processing.ribonucleases	0.000262271	0.293898	0.0581915	Age Regulated Only	27.1.19	CPZ
266957_at	At2g34640	1.3102	1.09431		0.72093	0.994608		0.748321	0.411759	0.68014	regulation of transcription	0.000113067	0.857814	0.0520477	Age Regulated Only	27.3	PTAC12 (PLASTID TRANSCRIPTIONALLY ACTIVE12)
259364_at	At1g13260	0.847441	1.19342		1.43998	1.2364		1.58444	2.69228	1.64151	regulation of transcription.AP2/EREBP, APETALA2/Ethylene-responsive element binding protein family	0.000308473	0.396579	0.186327	Age Regulated Only	27.3.3	RAV1 (Related to ABI3/VP1 1); DNA binding / transcription factor
261315_at	At1g53170	1.01686	0.787521		1.13293	1.28898		1.45887	1.62539	2.38782	regulation of transcription.AP2/EREBP, APETALA2/Ethylene-responsive element binding protein family	0.000700334	0.830797	0.290797	Age Regulated Only	27.3.3	ATERF-8/ATERF8 (ETHYLENE RESPONSE ELEMENT BINDING FACTOR 4); DNA binding / transcription factor/ transcriptional repressor
253043_at	At4g37540	0.995418	1.24423		0.828147	1.24264		0.554011	0.460914	0.553302	regulation of transcription.AS2,Lateral Organ Boundaries Gene Family	0.000236309	0.158999	0.891304	Age Regulated Only	27.3.37	LOB domain protein 39 / lateral organ boundaries domain protein 39 (LBD39)
249457_s_at	At1g66040;At1g66050;At5g39550	1.1437	1.14992		0.688119	1.00035		0.798419	0.480375	0.694574	regulation of transcription.C2H2 zinc finger family	0.000234622	0.395433	0.133718	Age Regulated Only	27.3.11	[AT1G66040, zinc finger (C3HC4-type RING finger) family protein];[AT1G66050, zinc finger (C3HC4-type RING finger) family protein];[AT5G39550, zinc finger (C3HC4-type RING finger) family protein]
258089_at	At3g14740	1.16163	1.10049		0.72867	0.894495		0.736362	0.461908	0.598527	regulation of transcription.C2H2 zinc finger family	0.000159514	0.954325	0.239232	Age Regulated Only	27.3.11	PHD finger family protein
253722_at	At4g29190	0.885083	0.909656		1.32315	1.07524		2.26634	3.38805	2.67888	regulation of transcription.C3H zinc finger family	1.51e-05	0.524866	0.353089	Age Regulated Only	27.3.12	zinc finger (CCCH-type) family protein
266253_at	At2g27840	1.21637	1.27167		0.82143	1.19606		0.636009	0.429506	0.59819	regulation of transcription.HDA	1.71e-05	0.129302	0.247121	Age Regulated Only	27.3.55	HDT4 (histone deacetylase 13)
267538_at	At2g41870	0.881691	0.981988		1.22455	1.47511		1.38553	1.92432	2.08129	regulation of transcription.putative transcription regulator	0.000241945	0.228139	0.20416	Age Regulated Only	27.3.67	remorin family protein
253735_at	At4g29160	0.763122	0.800682		1.25216	1.04312		1.2411	2.03644	1.61689	regulation of transcription.SNF7	0.000153139	0.628732	0.0955156	Age Regulated Only	27.3.71	SNF7 family protein
250445_at	At5g10760	0.479313	0.924246		0.833209	0.456436		2.97122	5.16499	1.46733	regulation of transcription.unclassified	0.000536725	0.127783	0.10612	Age Regulated Only	27.3.99	aspartyl protease family protein
254276_at	At4g22820	0.779738	0.833384		1.1436	1.33191		1.35656	1.9896	2.16805	regulation of transcription.unclassified	6.27e-05	0.507311	0.131466	Age Regulated Only	27.3.99	zinc finger (AN1-like) family protein
256890_at	At3g23830	1.1168	1.09977		0.729403	1.02854		0.72569	0.473961	0.678688	RNA binding	6.01e-05	0.494368	0.184192	Age Regulated Only	27.4	GR-RBP4/GRP4 (GLYCINE-RICH RNA-BINDING PROTEIN 4); RNA binding / double-stranded DNA binding / single-stranded DNA binding
DNA
253566_at	At4g31210	1.28167	1.2912		0.836754	1.11301		0.760024	0.496192	0.655138	synthesis/chromatin structure	0.000115913	0.191095	0.154967	Age Regulated Only	28.1	DNA topoisomerase family protein
256797_at	At3g18600	1.19027	1.20486		0.819259	1.10255		0.681452	0.469041	0.623588	synthesis/chromatin structure	1.51e-06	0.134488	0.0957852	Age Regulated Only	28.1	DEAD/DEAH box helicase, putative
265960_at	At2g37470	1.14026	1.05319		0.690449	0.995108		0.805487	0.487737	0.761064	synthesis/chromatin structure.histone	0.000151286	0.59185	0.0561685	Age Regulated Only	28.1.3	histone H2B, putative
256858_at	At3g15140	1.38237	1.2433		0.907924	1.19212		0.672722	0.441835	0.64503	unspecified	4.72e-05	0.18259	0.117575	Age Regulated Only	28.99	exonuclease family protein
Protein
246509_at	At5g16715	1.14337	0.916156		0.765255	1.01536		0.726007	0.485915	0.804619	aa activation. valine-tRNA ligase	0.000685498	0.92649	0.114914	Age Regulated Only	29.1.9	EMB2247 (EMBRYO DEFECTIVE 2247); ATP binding / aminoacyl-tRNA ligase
260772_at	At1g49050	0.775913	0.876381		1.1405	0.823321		1.53802	2.2607	1.4449	degradation.aspartate protease	0.000331499	0.384272	0.191794	Age Regulated Only	29.5.4	aspartyl protease family protein
254346_at	At4g21980	1.0529	0.978288		0.963906	1.14783		1.81994	1.66612	2.13535	degradation.autophagy	3e-07	0.40972	0.180005	Age Regulated Only	29.5.2	APG8A (autophagy 8A)
248487_at	At5g51070	0.927851	0.916791		1.28774	1.30189		1.42188	1.97339	2.01914	degradation.serine protease	4.13e-05	0.432788	0.1909	Age Regulated Only	29.5.5	ERD1 (EARLY RESPONSIVE TO DEHYDRATION 1); ATP binding / ATPase
260317_at	At1g63800	1.16766	0.930851		0.993213	1.11991		2.03132	1.72784	2.44389	degradation.ubiquitin.E2	6.55e-05	0.911579	0.543622	Age Regulated Only	29.5.11.3	UBC5 (ubiquitin-conjugating enzyme 37); ubiquitin-protein ligase
245197_at	At1g67800	0.703438	1.03206		1.15459	1.06603		1.84328	3.02549	1.90394	degradation.ubiquitin.E3.RING	0.000323979	0.940479	0.511365	Age Regulated Only	29.5.11.4.2	copine-related
251084_at	At5g01520	1.23196	0.891866		1.26843	1.40582		2.04725	2.10785	3.22702	degradation.ubiquitin.E3.RING	8.07e-06	0.238939	0.185229	Age Regulated Only	29.5.11.4.2	zinc finger (C3HC4-type RING finger) family protein
262758_at	At1g10780	0.870864	1.03479		0.809626	0.612261		0.703157	0.653713	0.416042	degradation.ubiquitin.E3.SCF.FBOX	8.33e-05	0.267453	0.156557	Age Regulated Only	29.5.11.4.3.2	F-box family protein
254076_at	At4g25340	1.13342	1.15795		0.644618	0.980784		0.873128	0.496579	0.739537	folding	0.000889726	0.269151	0.0947475	Age Regulated Only	29.6	immunophilin-related / FKBP-type peptidyl-prolyl cis-trans isomerase-related
250061_at	At5g17710	1.19159	1.02827		0.786747	1.05556		0.731914	0.483248	0.75134	folding	0.000118243	0.918395	0.0869319	Age Regulated Only	29.6	EMB1241 (EMBRYO DEFECTIVE 1241); adenyl-nucleotide exchange factor/ chaperone binding / protein binding / protein homodimerization
253453_at	At4g31860	1.20222	0.952877		0.93547	1.1066		1.79233	1.39465	2.08147	postranslational modification	0.000302208	0.928152	0.36049	Age Regulated Only	29.4	protein phosphatase 2C, putative / PP2C, putative
253780_at	At4g28400	0.820373	0.981795		1.08303	0.965481		1.57191	2.07518	1.54579	postranslational modification	0.000151556	0.96993	0.467603	Age Regulated Only	29.4	protein phosphatase 2C, putative / PP2C, putative
247514_at	At5g61640	0.886429	1.14759		1.19521	1.04951		1.70482	2.29868	1.55913	postranslational modification	0.000121251	0.779742	0.348556	Age Regulated Only	29.4	PMSR1 (PEPTIDEMETHIONINE SULFOXIDE REDUCTASE 1); protein-methionine-S-oxide reductase
247602_at	At5g60900	0.929683	0.797515		0.799838	0.744299		2.36496	2.03466	2.20716	postranslational modification	5.03e-05	0.211998	0.582992	Age Regulated Only	29.4	RLK1 (RECEPTOR-LIKE PROTEIN KINASE 1); carbohydrate binding / kinase
255148_at	At4g08470	0.827369	0.840738		1.09709	0.778314		1.75469	2.3267	1.6244	postranslational modification	0.00022371	0.277439	0.337685	Age Regulated Only	29.4	MAPKKK10 (Mitogen-activated protein kinase kinase kinase 10); kinase
263804_at	At2g40270	0.839518	0.930487		0.986613	0.856518		1.86619	2.19317	1.71784	postranslational modification.kinase.receptor like cytoplasmatic kinase I	3.95e-05	0.60274	0.606424	Age Regulated Only	29.4.1.51	protein kinase family protein
261526_at	At1g14370	0.998857	1.1198		1.24072	0.981368		1.68107	2.08812	1.47325	postranslational modification.kinase.receptor like cytoplasmatic kinase VII	6.17e-05	0.424355	0.224021	Age Regulated Only	29.4.1.57	APK2A (PROTEIN KINASE 2A); kinase
250304_at	At5g12110	1.22813	1.0689		0.864724	1.14463		0.625345	0.440302	0.669648	synthesis.elongation	5.12e-06	0.51791	0.0790972	Age Regulated Only	29.2.4	elongation factor 1B alpha-subunit 1 (eEF1Balpha1)
254300_at	At4g22780	0.657441	0.926193		1.17892	1.14518		1.33173	2.38804	1.6466	synthesis.elongation	0.000956475	0.814336	0.282337	Age Regulated Only	29.2.4	ACR7 (ACT Domain Repeat 7)
245886_at	At5g09510	1.02915	1.14687		0.636721	0.940527		0.803968	0.497402	0.659319	synthesis.ribosomal eukaryotic.40S subunit.S15	0.000396521	0.17427	0.258501	Age Regulated Only	29.2.1.2.1.15	40S ribosomal protein S15 (RPS15D)
258410_at	At3g16780	1.12939	1.20546		0.70291	1.12755		0.762741	0.474717	0.713444	synthesis.ribosomal eukaryotic.60S subunit.L19	0.000123812	0.0927411	0.149747	Age Regulated Only	29.2.1.2.2.19	60S ribosomal protein L19 (RPL19B)
266981_at	At2g39460	1.08559	1.05187		0.679085	0.999818		0.797443	0.498834	0.757985	synthesis.ribosomal eukaryotic.60S subunit.L23A	9.12e-05	0.29907	0.0696583	Age Regulated Only	29.2.1.2.2.523	ATRPL23A (RIBOSOMAL PROTEIN L23A); RNA binding / structural constituent of ribosome
256065_at	At1g07070	1.14724	1.12567		0.661487	0.96443		0.820554	0.473124	0.703021	synthesis.ribosomal eukaryotic.60S subunit.L35A	0.000330434	0.486159	0.105283	Age Regulated Only	29.2.1.2.2.535	60S ribosomal protein L35a (RPL35aA)
267349_at	At2g40008;At2g40010	1.26071	1.26094		0.981715	1.12076		0.567568	0.441964	0.50447	synthesis.ribosomal eukaryotic.60S subunit.P0	3.54e-05	0.345593	0.487052	Age Regulated Only	29.2.1.2.2.80	[AT2G40010, 60S acidic ribosomal protein P0 (RPP0A)]
249945_at	At5g22440	1.12732	1.08349		0.7118	1.10838		0.704614	0.444899	0.720797	synthesis.ribosomal prokaryotic.unknown organellar.50S subunit.L10A	0.000108262	0.423638	0.145483	Age Regulated Only	29.2.1.1.3.2.510	60S ribosomal protein L10A (RPL10aC)
253358_at	At4g32940	0.757607	0.818524		1.46198	1.04018		2.38591	4.60417	3.03201	targeting.secretory pathway.vacuole	0.000424092	0.580744	0.380472	Age Regulated Only	29.3.4.3	GAMMA-VPE (Vacuolar processing enzyme gamma); cysteine-type endopeptidase
Signalling
265460_at	At2g46600	1.08898	1.29428		1.13102	1.13003		1.94702	2.02219	1.69993	calcium	4.71e-05	0.397149	0.85648	Age Regulated Only	30.3	calcium-binding protein, putative
256144_at	At1g48630	1.16463	1.12601		0.736094	0.973011		0.696349	0.440119	0.601731	G-proteins	1.36e-05	0.71181	0.141646	Age Regulated Only	30.5	guanine nucleotide-binding family protein / activated protein kinase C receptor, putative / RACK, putative
262086_at	At1g56050	1.10112	1.03966		0.915507	1.08638		0.597995	0.497192	0.624868	G-proteins	8.82e-07	0.751198	0.344856	Age Regulated Only	30.5	GTP-binding protein-related
245731_at	At1g73500	1.20668	1.0371		1.34281	1.36944		1.81299	2.01754	2.39397	MAP kinases	0.000103667	0.244386	0.463599	Age Regulated Only	30.6	ATMKK9 (Arabidopsis thaliana MAP kinase kinase 9); kinase
249486_at	At5g39030	0.636071	0.794847		0.874716	0.653502		2.41385	3.31949	1.9846	receptor kinases.Catharanthus roseus-like RLK1	5.21e-06	0.0554397	0.182901	Age Regulated Only	30.2.16	protein kinase family protein
254265_s_at	At4g23140;At4g23160	0.460667	1.18008		1.10773	0.717532		2.54553	6.12106	1.54777	receptor kinases.DUF 26	0.000370576	0.781414	0.119879	Age Regulated Only	30.2.17	[AT4G23140, CRK6 (CYSTEINE-RICH RLK 6); kinase];[AT4G23160, protein kinase family protein]
255502_at	At4g02410	0.81656	1.04855		1.18639	0.94221		1.66516	2.41934	1.49629	receptor kinases.legume-lectin	5.2e-05	0.848665	0.14381	Age Regulated Only	30.2.19	lectin protein kinase family protein
246633_at	At1g29720	0.94074	0.627058		1.04031	0.867006		1.5989	1.76813	2.21073	receptor kinases.leucine rich repeat VIII-2	0.000280273	0.172051	0.883509	Age Regulated Only	30.2.8.2	protein kinase family protein
261339_at	At1g35710	0.579518	0.73703		0.714034	0.512996		2.5048	3.08621	1.74342	receptor kinases.leucine rich repeat XII	0.000529203	0.0552521	0.265409	Age Regulated Only	30.2.12	leucine-rich repeat transmembrane protein kinase, putative
256366_at	At1g66880	0.749534	1.13656		0.927237	0.631525		2.48828	3.07821	1.3826	receptor kinases.wheat LRK10 like	0.000103631	0.330178	0.0793269	Age Regulated Only	30.2.20	serine/threonine protein kinase family protein
Cell
261660_at	At1g18370	0.729437	0.890793		0.863237	0.725477		0.558077	0.660444	0.454508	organisation	9.53e-06	0.0532707	0.198296	Age Regulated Only	31.1	HIK (HINKEL); microtubule motor
261780_at	At1g76310	1.08772	1.07851		0.745902	1.08705		0.708592	0.485914	0.714206	cycle	0.000776642	0.559541	0.396429	Age Regulated Only	31.3	CYCB2;4 (CYCLIN B2;4); cyclin-dependent protein kinase regulator
252053_at	At3g52400	0.890198	0.929469		1.03557	1.18081		1.70452	1.98288	2.16546	vesicle transport	0.000678211	0.8173	0.73653	Age Regulated Only	31.4	SYP122 (syntaxin 122); t-SNARE
Development
245038_at	At2g26560	0.672051	0.693762		0.870385	0.805307		3.02142	3.9131	3.50721	storage proteins	0.000112914	0.539157	0.938942	Age Regulated Only	33.1	PLP2 (PHOSPHOLIPASE A 2A); nutrient reservoir
251678_at	At3g56990	1.2598	1.16436		0.89124	1.23016		0.644196	0.455734	0.680598	unspecified	0.000441694	0.44986	0.337343	Age Regulated Only	33.99	EDA7 (embryo sac development arrest 7)
252234_at	At3g49780	0.912363	1.21534		0.794949	1.04179		2.082	1.81407	1.7847	unspecified	0.000203659	0.202653	0.735915	Age Regulated Only	33.99	ATPSK4 (PHYTOSULFOKINE 4 PRECURSOR); growth factor
255957_at	At1g22160	0.832808	0.668618		1.24615	0.888896		2.40042	3.59182	3.19125	unspecified	3.66e-05	0.317724	0.452923	Age Regulated Only	33.99	senescence-associated protein-related
256225_at	At1g56220	0.999592	0.738837		0.787129	0.927121		1.68862	1.32971	2.11895	unspecified	3.5e-06	0.111558	0.0537427	Age Regulated Only	33.99	dormancy/auxin associated family protein
258921_at	At3g10500	0.664829	0.940027		1.19426	0.96283		1.40269	2.51971	1.43672	unspecified	0.000814791	0.945783	0.158541	Age Regulated Only	33.99	ANAC053 (Arabidopsis NAC domain containing protein 53); transcription factor
260156_at	At1g52880	0.729846	1.06067		1.21975	0.960123		1.66523	2.78301	1.50738	unspecified	2.03e-05	0.931875	0.0578195	Age Regulated Only	33.99	NAM (Arabidopsis NAC domain containing protein 18); transcription factor
263584_at	At2g17040	0.799316	1.2959		0.964562	0.878336		2.49731	3.01359	1.69263	unspecified	0.00028341	0.879683	0.515912	Age Regulated Only	33.99	ANAC036 (Arabidopsis NAC domain containing protein 36); transcription factor
267460_at	At2g33815;At2g33810	1.15409	0.769092		0.791643	0.78896		2.77112	1.90084	2.84271	unspecified	2.05e-05	0.315457	0.388915	Age Regulated Only	33.99	[AT2G33810, SPL3 (SQUAMOSA PROMOTER BINDING PROTEIN-LIKE 3); transcription factor]
Transport
246260_at	At1g31820	0.998464	1.22604		0.82316	0.820878		2.15356	1.77545	1.44188	amino acids	4.01e-05	0.507635	0.198468	Age Regulated Only	34.3	amino acid permease family protein
249346_at	At5g40780	0.542601	0.720088		1.15058	0.654985		2.13016	4.51697	1.93757	amino acids	0.000765109	0.303632	0.225498	Age Regulated Only	34.3	LHT1 (LYSINE HISTIDINE TRANSPORTER 1); amino acid permease/ amino acid transporter
246302_at	At3g51860	0.608508	1.55149		1.28607	1.15887		2.4099	5.09328	1.80005	calcium or metal	0.000801521	0.612707	0.386534	Age Regulated Only	34.21	CAX3 (cation exchanger 3); cation:cation antiporter
263776_s_at	At2g46430;At2g46440	0.749183	0.809819		1.06394	0.647155		2.23254	3.17051	1.7841	cyclic nucleotide or calcium regulated channels	5.51e-05	0.114425	0.14664	Age Regulated Only	34.22	[AT2G46430, ATCNGC3 (CYCLIC NUCLEOTIDE GATED CHANNEL 3); calmodulin binding / cyclic nucleotide binding / ion channel];[AT2G46440, ATCNGC11 (cyclic nucleotide gated channel 11); calmodulin binding / cyclic nucleotide binding / ion channel]
253776_at	At4g28390	0.629326	1.01388		0.950619	0.852632		1.94349	2.93571	1.6344	metabolite transporters at the mitochondrial membrane	0.000342761	0.612314	0.484901	Age Regulated Only	34.9	AAC3 (ADP/ATP CARRIER 3); ATP:ADP antiporter/ binding
259980_at	At1g76520	1.28607	1.1313		0.927887	0.803927		2.5335	1.82789	1.80036	misc	0.000125684	0.643884	0.470849	Age Regulated Only	34.99	auxin efflux carrier family protein
245671_at	At1g28230	0.959835	0.627318		1.02567	0.879345		1.43132	1.52949	2.00636	nucleotides	0.000540535	0.114239	0.767939	Age Regulated Only	34.10	PUP1 (PURINE PERMEASE 1); purine transporter
246783_at	At5g27360	1.31511	1.30462		0.846318	1.28731		0.709256	0.456431	0.699848	sugars	0.000363752	0.131285	0.204963	Age Regulated Only	34.2	SFP2 (SFP2); carbohydrate transporter/ sugar porter
246831_at	At5g26340	0.648429	0.578774		0.797911	0.693153		2.22531	2.7383	2.66508	sugars	3.01e-05	0.0549091	0.82118	Age Regulated Only	34.2	MSS1 (SUGAR TRANSPORT PROTEIN 13); carbohydrate transporter/ hexose:hydrogen symporter/ high-affinity hydrogen:glucose transporter/ sugar porter
264654_s_at	At1g08890;At1g08900	1.19002	1.01984		0.936237	1.15295		1.96318	1.54452	2.21941	sugars	2.37e-05	0.638611	0.274269	Age Regulated Only	34.2	[AT1G08890, sugar transporter family protein];[AT1G08900, carbohydrate transporter]
248970_at	At5g45380	0.861736	0.874955		1.10463	0.602577		2.5234	3.23466	1.73785	unspecified cations	0.000717362	0.218253	0.250357	Age Regulated Only	34.14	sodium:solute symporter family protein
Not assigned
254952_at	At4g10955;At4g10960	0.860718	0.926188		1.34427	1.41682		1.64105	2.563	2.51037	disagreeing hits	9.37e-05	0.454178	0.253804	Age Regulated Only	35.3	[AT4G10955, lipase class 3 family protein];[AT4G10960, UGE5 (UDP-D-glucose/UDP-D-galactose 4-epimerase 5); UDP-glucose 4-epimerase/ protein dimerization]
251739_at	At3g56170	0.768902	1.0917		1.01781	0.992662		1.74655	2.31193	1.5881	no ontology	7.75e-06	0.565239	0.385326	Age Regulated Only	35.1	CAN (CA-2+ DEPENDENT NUCLEASE); nuclease
245749_at	At1g51090	0.801619	0.797511		0.878148	0.911789		1.87267	2.05145	2.14102	no ontology	6e-07	0.163665	0.956448	Age Regulated Only	35.1	heavy-metal-associated domain-containing protein
246293_at	At3g56710	0.592438	0.68177		0.854504	0.680908		2.04462	2.94906	2.04203	no ontology	0.00022939	0.133544	0.613561	Age Regulated Only	35.1	SIB1 (SIGMA FACTOR BINDING PROTEIN 1); binding
247140_at	At5g66250	0.926741	0.927645		1.37663	1.11896		1.36599	2.02912	1.64771	no ontology	0.000301159	0.360548	0.208634	Age Regulated Only	35.1	kinectin-related
248327_at	At5g52750	0.94483	1.06089		0.97258	0.897898		2.26543	2.33196	1.91737	no ontology	0.000705046	0.962772	0.87148	Age Regulated Only	35.1	heavy-metal-associated domain-containing protein
248868_at	At5g46780	1.43829	1.35298		0.975507	0.925042		2.09883	1.42351	1.43498	no ontology	0.000183097	0.563519	0.297866	Age Regulated Only	35.1	VQ motif-containing protein
249237_at	At5g42050	0.778176	1.19698		1.35223	1.27016		1.59033	2.7635	1.68757	no ontology	2.32e-05	0.225902	0.102756	Age Regulated Only	35.1	similar to unknown protein [Arabidopsis thaliana] (TAIR:AT3G27090.1); similar to N-rich protein [Glycine max] (GB:CAI44933.1); contains domain KELCH-RELATED PROTEINS (PTHR23230); contains domain no description (SM00767); contains domain gb def: Hypothetic
255278_at	At4g04940	1.04335	1.19362		0.678951	1.06921		0.749663	0.487836	0.671528	no ontology	0.000313855	0.110887	0.367774	Age Regulated Only	35.1	transducin family protein / WD-40 repeat family protein
256862_at	At3g23940	1.28937	1.15504		0.850477	1.16517		0.646492	0.42643	0.652159	no ontology	5.29e-06	0.266536	0.0613221	Age Regulated Only	35.1	dehydratase family
257700_at	At3g12740	0.847844	0.978129		1.21041	1.07836		1.43265	2.0453	1.57946	no ontology	0.000936068	0.914095	0.444157	Age Regulated Only	35.1	LEM3 (ligand-effect modulator 3) family protein / CDC50 family protein
257860_at	At3g13062	0.665452	0.752385		1.0463	0.868818		1.35888	2.1366	1.56917	no ontology	2.86e-05	0.124869	0.131766	Age Regulated Only	35.1	similar to unknown protein [Arabidopsis thaliana] (TAIR:AT1G55960.1); similar to Lipid-binding START [Medicago truncatula] (GB:ABE91086.1); contains InterPro domain Lipid-binding START; (InterPro:IPR002913)
258259_s_at	At3g26820;At3g26840	0.916228	1.33825		1.23593	1.27726		1.79768	2.42496	1.71575	no ontology	0.000164037	0.233965	0.551345	Age Regulated Only	35.1	[AT3G26820, esterase/lipase/thioesterase family protein];[AT3G26840, esterase/lipase/thioesterase family protein]
258505_at	At3g06530	1.00755	1.17166		0.955164	0.893809		0.597396	0.566337	0.455729	no ontology	4.84e-05	0.785267	0.454577	Age Regulated Only	35.1	BAP28-related
259102_at	At3g11660	0.824088	0.926051		1.19025	0.826302		1.5835	2.28708	1.41294	no ontology	4.32e-05	0.220699	0.0654521	Age Regulated Only	35.1	NHL1 (NDR1/HIN1-like 1)
259789_at	At1g29395	0.988532	0.611463		1.04953	0.981871		2.33361	2.4776	3.74724	no ontology	8.78e-05	0.67743	0.859406	Age Regulated Only	35.1	COR414-TM1 (cold regulated 414 thylakoid membrane 1)
259977_at	At1g76590	1.08685	1.20182		1.23974	1.00319		2.32126	2.64779	1.93762	no ontology	4.2e-05	0.513784	0.487916	Age Regulated Only	35.1	zinc-binding family protein
260211_at	At1g74440	0.762387	1.00424		0.873555	0.737441		1.94327	2.22662	1.427	no ontology	0.000254126	0.333266	0.312874	Age Regulated Only	35.1	similar to unknown protein [Arabidopsis thaliana] (TAIR:AT1G18720.1); similar to YGL010w-like protein [Picea mariana] (GB:AAC32136.1); contains InterPro domain Protein of unknown function DUF962; (InterPro:IPR009305)
261711_at	At1g32700	0.818683	0.801287		1.23574	0.978367		1.4662	2.21312	1.79022	no ontology	0.000808235	0.601286	0.40374	Age Regulated Only	35.1	zinc-binding family protein
262164_at	At1g78070	0.948612	1.26556		1.14171	1.34373		1.90203	2.28921	2.01952	no ontology	4.64e-05	0.145184	0.663497	Age Regulated Only	35.1	WD-40 repeat family protein
262772_at	At1g13210	0.957905	0.882857		1.2664	0.786857		1.58981	2.10181	1.41694	no ontology	0.000249268	0.066636	0.133138	Age Regulated Only	35.1	haloacid dehalogenase-like hydrolase family protein
262803_at	At1g21000	0.715769	1.02428		1.43093	0.972324		1.66698	3.33253	1.58243	no ontology	0.000549893	0.618011	0.105459	Age Regulated Only	35.1	zinc-binding family protein
264968_at	At1g67360	1.00246	1.18372		1.2342	1.12435		2.38449	2.93572	2.26489	no ontology	9.23e-06	0.546541	0.565984	Age Regulated Only	35.1	rubber elongation factor (REF) family protein
265680_at	At2g32150	1.15055	1.27523		1.43105	1.59245		1.60179	1.9923	2.00024	no ontology	0.000476258	0.0935062	0.41659	Age Regulated Only	35.1	haloacid dehalogenase-like hydrolase family protein
246976_s_at	At5g24810	0.762291	0.836073		1.17913	0.88902		1.36203	2.10682	1.44829	no ontology.ABC1 family protein	9.74e-05	0.302617	0.0906831	Age Regulated Only	35.1.1	ABC1 family protein
264893_at	At1g23140	1.14896	0.993059		0.824665	0.77329		2.11479	1.51789	1.64677	no ontology.C2 domain-containing protein	1.96e-06	0.139278	0.0744265	Age Regulated Only	35.1.19	C2 domain-containing protein
265344_at	At2g22660	0.800389	0.918893		1.20326	0.991412		1.51977	2.28473	1.63971	no ontology.glycine rich proteins	2.23e-05	0.742653	0.148833	Age Regulated Only	35.1.40	similar to glycine-rich protein [Arabidopsis thaliana] (TAIR:AT4G37900.1); similar to Protein of unknown function DUF1399 [Medicago truncatula] (GB:ABE84186.1); contains InterPro domain Protein of unknown function DUF1399; (InterPro:IPR009836)
257122_at	At3g20250	1.03578	1.12486		0.907575	0.909967		2.59793	2.27636	2.10162	no ontology.pumilio/Puf RNA-binding domain-containing protein	3.03e-05	0.92718	0.777669	Age Regulated Only	35.1.12	APUM5 (ARABIDOPSIS PUMILIO 5); RNA binding
251669_at	At3g57180	1.0738	0.995591		0.869709	1.2492		0.578211	0.468313	0.725499	unknown	4.1e-06	0.48265	0.114635	Age Regulated Only	35.2	GTP binding
251937_at	At3g53400	1.38508	1.06289		0.77477	0.823611		2.02087	1.13041	1.56593	unknown	0.000392797	0.611824	0.0512648	Age Regulated Only	35.2	similar to unknown protein [Arabidopsis thaliana] (TAIR:AT5G03190.1); similar to conserved hypothetical protein [Medicago truncatula] (GB:ABD32814.1); contains domain ARM repeat (SSF48371); contains domain no description (G3D.3.40.50.1860)
252976_s_at	At4g38550	0.821511	0.867085		1.04272	0.842523		1.8022	2.28747	1.75115	unknown	0.000665588	0.638894	0.669052	Age Regulated Only	35.2	similar to unknown protein [Arabidopsis thaliana] (TAIR:AT2G20950.3); similar to pEARLI 4 gene product (GB:AAC37472.1); contains InterPro domain Arabidopsis phospholipase-like; (InterPro:IPR007942)
253228_at	At4g34630	0.707663	0.931404		1.14298	0.788533		1.43492	2.31762	1.21482	unknown	0.000537395	0.393148	0.0549549	Age Regulated Only	35.2	similar to unknown protein [Arabidopsis thaliana] (TAIR:AT5G48420.1); similar to hypothetical protein MtrDRAFT_AC149637g23v1 [Medicago truncatula] (GB:ABE88368.1)
253854_at	At4g27900	1.08191	1.05356		1.42255	1.0249		1.57508	2.071	1.53223	unknown	0.000238814	0.122509	0.21318	Age Regulated Only	35.2	similar to unknown protein [Arabidopsis thaliana] (TAIR:AT5G53420.1); similar to CCT [Medicago truncatula] (GB:ABE82748.1); contains InterPro domain CCT; (InterPro:IPR010402)
253992_at	At4g26060	0.986691	0.982498		1.38129	1.0463		1.93747	2.71231	2.06328	unknown	0.000149025	0.378902	0.366829	Age Regulated Only	35.2	similar to unknown protein [Arabidopsis thaliana] (TAIR:AT5G57060.1); similar to conserved hypothetical protein [Medicago truncatula] (GB:ABE79016.1); contains domain 60S RIBOSOMAL PROTEIN L18A (PTHR10052); contains domain 60S RIBOSOMAL PROTEIN L18A, PLAN
246018_at	At5g10695	0.982968	1.25217		1.20705	1.2688		1.67595	2.058	1.69821	unknown	6.05e-05	0.177857	0.597457	Age Regulated Only	35.2	similar to unknown protein [Arabidopsis thaliana] (TAIR:AT5G57123.1); similar to conserved hypothetical protein [Medicago truncatula] (GB:ABD28467.1); contains domain Glucocorticoid receptor-like (DNA-binding domain) (SSF57716)
247903_at	At5g57340	1.02566	0.914802		0.884854	1.1664		1.69021	1.45817	2.15507	unknown	0.000970635	0.689996	0.393979	Age Regulated Only	35.2	similar to unknown protein [Arabidopsis thaliana] (TAIR:AT5G67390.2); similar to conserved hypothetical protein [Medicago truncatula] (GB:ABE83997.1)
248581_at	At5g49900	1.24802	1.11834		0.875322	0.846704		2.01392	1.4125	1.52475	unknown	0.000100628	0.776721	0.246031	Age Regulated Only	35.2	similar to unknown protein [Arabidopsis thaliana] (TAIR:AT1G33700.2); similar to unknown protein [Arabidopsis thaliana] (TAIR:AT4G10060.1); similar to unknown protein [Arabidopsis thaliana] (TAIR:AT3G24180.2); similar to unknown protein [Oryza sativa] (GB
249021_at	At5g44820	0.793657	1.35269		1.01292	0.892479		2.12877	2.7169	1.40452	unknown	2e-05	0.715447	0.113509	Age Regulated Only	35.2	similar to unknown protein [Arabidopsis thaliana] (TAIR:AT4G19970.1); similar to H0307D04.3 [Oryza sativa (indica cultivar-group)] (GB:CAH66858.1); contains domain (Trans)glycosidases (SSF51445); contains domain PENTATRICOPEPTIDE REPEAT-CONTAINING PROTEIN
249920_at	At5g19260	0.869916	0.992501		1.22944	0.952704		0.514616	0.727299	0.493981	unknown	0.000561409	0.9889	0.413468	Age Regulated Only	35.2	similar to unknown protein [Arabidopsis thaliana] (TAIR:AT3G06020.1); similar to hypothetical protein 12 [Plantago major] (GB:CAJ34820.1)
249929_at	At5g22340	1.11521	0.834111		0.76453	0.853247		0.710585	0.487139	0.726886	unknown	5.82e-05	0.192306	0.0815967	Age Regulated Only	35.2	similar to Os03g0322600 [Oryza sativa (japonica cultivar-group)] (GB:NP_001049968.1)
254574_at	At4g19430	1.41074	1.58311		1.43713	1.50996		3.03796	3.09479	2.8976	unknown	0.000394128	0.278622	0.726874	Age Regulated Only	35.2	unknown protein
254624_at	At4g18580	1.3492	0.979307		0.702147	0.904738		2.61485	1.36081	2.41574	unknown	4.06e-05	0.642698	0.0650861	Age Regulated Only	35.2	unknown protein
254850_at	At4g12000	0.805002	1.16692		1.0516	0.968217		1.60264	2.09358	1.32974	unknown	6.29e-05	0.677435	0.191213	Age Regulated Only	35.2	similar to unknown protein [Arabidopsis thaliana] (TAIR:AT4G22850.1); similar to At1g12450-related [Medicago truncatula] (GB:ABE81486.1); contains domain UNCHARACTERIZED (PTHR12677)
255243_at	At4g05590	1.14866	1.1194		0.963016	0.951333		2.77652	2.32779	2.35964	unknown	3.92e-06	0.991629	0.841913	Age Regulated Only	35.2	similar to unknown protein [Arabidopsis thaliana] (TAIR:AT4G22310.1); similar to Protein of unknown function UPF0041 [Medicago truncatula] (GB:ABD28486.1); contains InterPro domain Protein of unknown function UPF0041; (InterPro:IPR005336)
255671_at	At4g00355	0.829986	0.797501		1.33008	1.026		1.3118	2.1022	1.68765	unknown	2.64e-05	0.185654	0.052787	Age Regulated Only	35.2	similar to unknown protein [Arabidopsis thaliana] (TAIR:AT2G45980.1); similar to conserved hypothetical protein [Medicago truncatula] (GB:ABE80179.1)
256061_at	At1g07040	1.16854	1.0406		0.85672	0.887575		2.09145	1.53336	1.78389	unknown	3.85e-06	0.750608	0.232159	Age Regulated Only	35.2	similar to unknown protein [Arabidopsis thaliana] (TAIR:AT1G27030.1); similar to unknown protein [Oryza sativa (japonica cultivar-group)] (GB:AAN05517.1); similar to Os10g0463800 [Oryza sativa (japonica cultivar-group)] (GB:NP_001064789.1)
256096_at	At1g13650	1.03989	0.959712		0.746356	1.01501		0.545762	0.391706	0.577209	unknown	3.32e-05	0.87073	0.475698	Age Regulated Only	35.2	similar to 18S pre-ribosomal assembly protein gar2-related [Arabidopsis thaliana] (TAIR:AT2G03810.3); similar to hypothetical protein [Trypanosoma cruzi strain CL Brener] (GB:XP_813437.1)
256569_at	At3g19550	0.924681	0.817304		0.686299	0.616744		2.75435	2.04428	2.07845	unknown	5.92e-05	0.062934	0.184655	Age Regulated Only	35.2	similar to expressed protein [Oryza sativa (japonica cultivar-group)] (GB:ABA98694.1); similar to Os12g0507700 [Oryza sativa (japonica cultivar-group)] (GB:NP_001066848.1)
256752_at	no_match	1.19678	1.14505		0.740752	1.00354		0.748073	0.463024	0.65562	unknown	8.08e-05	0.655277	0.132809	Age Regulated Only	35.2	no_match
257063_s_at	At4g21460;At3g18240	1.01887	0.8798		1.33798	0.944424		0.459185	0.603002	0.492914	unknown	0.00024232	0.379331	0.821154	Age Regulated Only	35.2	[AT4G21460, similar to unknown protein [Arabidopsis thaliana] (TAIR:AT3G18240.2); similar to Os08g0513300 [Oryza sativa (japonica cultivar-group)] (GB:NP_001062225.1); similar to Protein involved in high osmolarity signaling pathway (ISS) [Ostreococcus ta
257154_at	At3g27210	0.989885	1.2582		1.36656	1.32523		2.07392	2.86309	2.18439	unknown	6.25e-07	0.0676212	0.169024	Age Regulated Only	35.2	similar to unknown protein [Arabidopsis thaliana] (TAIR:AT5G40860.1); similar to Os04g0380200 [Oryza sativa (japonica cultivar-group)] (GB:NP_001052596.1); similar to OSJNBb0089B03.11 [Oryza sativa (japonica cultivar-group)] (GB:CAE03997.1); similar to Os
258201_at	At3g13910	0.891287	1.11213		1.25484	0.964835		1.65064	2.32394	1.43203	unknown	1.51e-05	0.490396	0.0587254	Age Regulated Only	35.2	similar to unknown protein [Arabidopsis thaliana] (TAIR:AT2G19460.1); similar to hypothetical protein MtrDRAFT_AC152551g19v1 [Medicago truncatula] (GB:ABE86249.1)
258419_at	At3g16670	0.967952	0.842821		0.875503	1.01348		0.516252	0.466945	0.620783	unknown	0.000687197	0.817421	0.683683	Age Regulated Only	35.2	similar to unknown protein [Arabidopsis thaliana] (TAIR:AT3G16660.1); similar to Phylloplanin precursor (T-phylloplanin) (GB:Q56S59)
259278_at	At3g01160	0.904019	1.17543		0.832163	1.04144		0.563547	0.518754	0.499307	unknown	1.19e-05	0.106399	0.586747	Age Regulated Only	35.2	similar to unknown protein [Arabidopsis thaliana] (TAIR:AT3G28770.1); similar to conserved hypothetical protein [Medicago truncatula] (GB:ABE90093.1); contains domain RNA-binding domain, RBD (SSF54928); contains domain UNCHARACTERIZED (PTHR12202); contain
259661_at	At1g55265	1.02223	1.01925		1.06718	0.818703		2.31607	2.41793	1.86037	unknown	1.55e-05	0.411328	0.403911	Age Regulated Only	35.2	similar to unknown protein [Arabidopsis thaliana] (TAIR:AT5G19860.1); similar to Protein of unknown function DUF538 [Medicago truncatula] (GB:ABE78678.1); contains InterPro domain Protein of unknown function DUF538; (InterPro:IPR007493)
259765_at	At1g64370	0.853323	0.873577		1.28634	0.98478		1.40778	2.12215	1.58699	unknown	0.000231452	0.412995	0.186227	Age Regulated Only	35.2	similar to hypothetical protein FG03565.1 [Gibberella zeae PH-1] (GB:XP_383741.1)
259766_at	At1g64360	1.02485	0.516567		0.686249	0.551606		4.68781	3.139	5.00578	unknown	3.36e-05	0.0733604	0.245371	Age Regulated Only	35.2	unknown protein
261026_at	At1g01240	1.31083	0.882075		1.29518	1.13255		1.59802	1.57894	2.0518	unknown	0.000121309	0.0740741	0.6271	Age Regulated Only	35.2	similar to unknown protein [Arabidopsis thaliana] (TAIR:AT2G46550.1); similar to Os09g0363500 [Oryza sativa (japonica cultivar-group)] (GB:NP_001062992.1); similar to Os08g0400300 [Oryza sativa (japonica cultivar-group)] (GB:NP_001061754.1); similar to hy
261056_at	At1g01360	0.7169	0.964114		1.12055	0.913334		1.63859	2.56118	1.55228	unknown	0.00014185	0.874422	0.228096	Age Regulated Only	35.2	similar to unknown protein [Arabidopsis thaliana] (TAIR:AT4G01026.1); similar to CAPIP1 [Capsicum annuum] (GB:AAT35532.1); contains domain Bet v1-like (SSF55961); contains domain no description (G3D.3.30.530.20)
261221_at	At1g19960	0.857923	0.460337		0.784508	0.685921		2.06131	1.88492	3.07145	unknown	0.000548865	0.0886613	0.822477	Age Regulated Only	35.2	similar to transmembrane receptor [Arabidopsis thaliana] (TAIR:AT2G32140.1)
262232_at	At1g68600	1.03012	0.713147		0.992739	0.913166		3.21169	3.09513	4.11248	unknown	7.18e-05	0.775075	0.997316	Age Regulated Only	35.2	similar to unknown protein [Arabidopsis thaliana] (TAIR:AT1G25480.1); similar to unknown protein [Arabidopsis thaliana] (TAIR:AT2G17470.1); similar to Putative expressed protein [Brassica oleracea] (GB:AAW81734.1); contains InterPro domain Protein of unkn
262452_at	At1g11210	0.87369	1.19776		1.35674	1.39122		1.79576	2.7886	2.0858	unknown	2.82e-05	0.185194	0.27281	Age Regulated Only	35.2	similar to unknown protein [Arabidopsis thaliana] (TAIR:AT1G11220.1); similar to fiber expressed protein [Gossypium hirsutum] (GB:AAY85179.1); similar to cotton fiber expressed protein 1 [Gossypium hirsutum] (GB:AAC33276.1); contains InterPro domain Prote
262607_at	At1g13990	0.836637	0.724824		0.887523	0.983992		2.10435	2.23234	2.85677	unknown	3.65e-05	0.654529	0.767104	Age Regulated Only	35.2	similar to Os03g0168200 [Oryza sativa (japonica cultivar-group)] (GB:NP_001049088.1)
263255_at	At1g10490	0.935928	1.05714		0.908151	0.749599		0.659182	0.639618	0.467415	unknown	3.45e-05	0.702271	0.300707	Age Regulated Only	35.2	Identical to UPF0202 protein At1g10490 [Arabidopsis Thaliana] (GB:Q9XIK4); similar to unknown protein [Arabidopsis thaliana] (TAIR:AT3G57940.1); similar to DEAD/DEAH box helicase, N-terminal [Medicago truncatula] (GB:ABE87709.1); similar to PREDICTED: sim
263574_at	At2g16990	0.879096	0.687759		1.04342	1.08373		1.45744	1.72986	2.29655	unknown	5.83e-05	0.773152	0.305049	Age Regulated Only	35.2	tetracycline transporter
263805_at	At2g40400	1.21307	1.0523		0.66634	1.15546		0.496142	0.27253	0.544782	unknown	1.28e-05	0.833057	0.152121	Age Regulated Only	35.2	similar to unknown protein [Arabidopsis thaliana] (TAIR:AT3G56140.1); similar to Trimeric LpxA-like [Medicago truncatula] (GB:ABE84885.1); similar to unknown protein [Oryza sativa (japonica cultivar-group)] (GB:AAU44243.1); similar to Os01g0826900 [Oryza
264958_at	At1g76960	0.827114	0.626197		0.896941	0.712586		3.12394	3.38767	3.55491	unknown	4.41e-06	0.137237	0.667749	Age Regulated Only	35.2	unknown protein
265837_at	At2g14560	0.842206	0.598003		0.661303	0.594164		2.7418	2.15287	2.72419	unknown	0.000226263	0.0629667	0.377072	Age Regulated Only	35.2	similar to unknown protein [Arabidopsis thaliana] (TAIR:AT1G33840.1); similar to Protein of unknown function DUF567 [Medicago truncatula] (GB:ABE88873.1); contains InterPro domain Protein of unknown function DUF567; (InterPro:IPR007612)
265895_at	At2g15000	1.2185	1.26664		0.953032	1.25958		0.638215	0.499172	0.63466	unknown	2.9e-05	0.0938723	0.409027	Age Regulated Only	35.2	similar to unknown protein [Arabidopsis thaliana] (TAIR:AT4G34265.2)
266007_at	At2g37380	0.869127	0.960651		0.857472	0.739622		0.624964	0.616584	0.48117	unknown	8.36e-05	0.384088	0.611385	Age Regulated Only	35.2	similar to unknown protein [Arabidopsis thaliana] (TAIR:AT2G39370.1); similar to Os01g0836900 [Oryza sativa (japonica cultivar-group)] (GB:NP_001044734.1); similar to hypothetical protein [Oryza sativa (japonica cultivar-group)] (GB:AAT39179.1)
267036_at	At2g38465	1.01203	0.714057		0.741529	0.879575		1.9232	1.40915	2.369	unknown	0.000156952	0.289227	0.245129	Age Regulated Only	35.2	unknown protein
Table S1B. Transcriptional response to increased CO2 at the early and late vegetative growth stages. Transcripts that showed at least 2 fold increase or decrease during any treatment were significant at p > 0.001 presented.
		Early vegetative stage (1.09 life stage)			Late vegetative stage (1.14 life stage)			Age affect on CO2 response
		CO2 levels			CO2 levels			400	1200	4000	ppm CO2
AffyID	MIPS	1200 vs 400	4000 vs 400		1200 vs 400	4000 vs 400		1.14/1.09	1.14/1.09	1.14/1.09	Life stages	P values of the mixed model analysis
Photosynthesis		Less than 1 is decrease and more than 1 is increase										Age	CO2	Age and CO2 Interaction		Mapman Bin Code	Description
244963_at	AtCg00570	0.439165	0.982455		1.76956	1.03723		0.506589	2.04124	0.534831	photosystem II.PSII polypeptide subunits	3.03e-05	0.0251271	3.2e-09	Significant Only by Age and CO2 and Interaction	1.1.1.2	PSII cytochrome b559
244964_at	AtCg00580	0.390719	1.01336		3.03479	1.03933		0.384872	2.98938	0.394732	photosystem II.PSII polypeptide subunits	0.00221956	0.188913	4.33e-09	Significant Only byAge and Interaction	1.1.1.2	PSII cytochrome b559. There have been many speculations about the function of Cyt b559, but the most favored at present is that it plays a protective role by acting as an electron acceptor or electron donor under conditions when electron flow through PSII
244972_at	AtCg00680	0.0949222	0.558349		3.8576	1.36234		0.120932	4.91462	0.295066	photosystem II.PSII polypeptide subunits	0.000493884	0.0104354	1.37e-05	Significant Only by Age and CO2 and Interaction	1.1.1.2	encodes for CP47, subunit of the photosystem II reaction center.
244974_at	AtCg00700	3.16508	0.649916		0.228754	1.05234		2.65643	0.191991	4.30126	photosystem II.PSII polypeptide subunits	0.122788	0.864821	8.89e-06	Significant Only by Interaction	1.1.1.2	PSII low MW protein
244975_at	AtCg00710	0.400622	1.10448		2.75354	1.0735		0.403989	2.77667	0.392655	photosystem II.PSII polypeptide subunits	0.0217112	0.715442	4.37e-06	Significant Only byAge and Interaction	1.1.1.2	Encodes a 8 kD phosphoprotein that is a component of the photosystem II oxygen evolving core. Its exact molecular function has not been determined but it may play a role in mediating electron transfer between the secondary quinone acceptors, QA and QB, as
245002_at	AtCg00270	0.185959	0.676161		2.64334	1.18513		0.18519	2.6324	0.324589	photosystem II.PSII polypeptide subunits	4.79e-09	2.53e-06	2.95e-10	Significant Only by Age and CO2 and Interaction	1.1.1.2	PSII D2 protein
245003_at	AtCg00280	0.205012	0.86046		3.05677	1.24131		0.207754	3.09766	0.29971	photosystem II.PSII polypeptide subunits	4.81e-08	0.000308345	5.92e-10	Significant Only by Age and CO2 and Interaction	1.1.1.2	chloroplast gene encoding a CP43 subunit of the photosystem II reaction center. promoter contains a blue-light responsive element.
245021_at	AtCg00550	0.670222	1.06309		2.00548	1.11639		0.673457	2.01516	0.707221	photosystem II.PSII polypeptide subunits	0.763654	0.0298074	1.21e-06	Significant Only byCO2 and Interaction	1.1.1.2	PSII component
245368_at	At4g15510	1.35753	0.905288		0.60511	0.972299		1.10495	0.492525	1.18674	photosystem II.PSII polypeptide subunits	0.0108621	0.547507	8.42e-06	Significant Only byAge and Interaction	1.1.1.2	photosystem II reaction center PsbP family protein
244932_at	AtCg01060	0.332583	0.872438		1.81804	0.990114		0.412608	2.25549	0.468261	photosystem I.PSI polypeptide subunits	0.000895795	0.0480187	3.35e-06	Significant Only by Age and CO2 and Interaction	1.1.2.2	Encodes the PsaC subunit of photosystem I.
245007_at	AtCg00350	0.230501	0.845505		2.69094	1.0153		0.285897	3.33765	0.343312	photosystem I.PSI polypeptide subunits	3.51e-06	0.00782948	1.59e-09	Significant Only by Age and CO2 and Interaction	1.1.2.2	Encodes psaA protein comprising the reaction center for photosystem I along with psaB protein; hydrophobic protein encoded by the chloroplast genome.
244966_at	AtCg00600	0.426763	1.1891		1.58051	1.00132		0.421191	1.55988	0.354678	cytochrome b6/f	1.18e-05	0.00483985	8.84e-06	Significant Only by Age and CO2 and Interaction	1.1.3	Cytochrome b6-f complex, subunit V. Disruption of homologous gene in Chlamydomonas results in disruption of cytochrome b6-f complex.
244995_at	AtCg00150	0.161833	0.651048		1.4582	0.793344		0.200021	1.8023	0.243738	ATP synthase	1.99e-05	0.000690107	8.13e-05	Significant Only by Age and CO2 and Interaction	1.1.4	Encodes a subunit of ATPase complex CF0, which is a proton channel that supplies the proton motive force to drive ATP synthesis by CF1 portion of the complex.
245025_at	AtCg00130	0.243455	0.938889		2.56498	0.884212		0.334316	3.52227	0.314847	ATP synthase	3.55e-05	0.0652546	5.87e-09	Significant Only byAge and Interaction	1.1.4	ATPase F subunit.
245026_at	AtCg00140	0.133758	0.725708		4.81695	1.08196		0.155611	5.60393	0.232001	ATP synthase	7.19e-07	0.00263706	1.47e-10	Significant Only by Age and CO2 and Interaction	1.1.4	ATPase III subunit
244936_at	AtCg01100	0.503958	0.961064		1.43761	0.896048		0.527677	1.50527	0.491979	cyclic electron flow-chlororespiration	2.7e-05	0.0314918	2.2e-06	Significant Only by Age and CO2 and Interaction	1.1.40	NADH dehydrogenase ND1
244937_at	AtCg01110	0.239166	0.800481		3.32732	0.936177		0.170413	2.37082	0.199301	cyclic electron flow-chlororespiration	4.35e-07	0.00802668	7.97e-08	Significant Only by Age and CO2 and Interaction	1.1.40	Encodes the 49KDa plastid NAD(P)H dehydrogenase subunit H protein. Its transcription is regulated by an ndhF-specific plastid sigma factor, SIG4.
248975_at	At5g45040	1.39766	0.841487		0.707313	0.975854		0.811646	0.410749	0.941248	other electron carrier (ox/red)	3.85e-06	0.028485	2.58e-05	Significant Only by Age and CO2 and Interaction	1.1.5	cytochrome c6 (ATC6)
245010_at	AtCg00420	0.374564	0.92703		1.90633	1.2752		0.397064	2.02085	0.54619	NADH DH	0.0104367	0.203852	0.000219662	Significant Only byAge and Interaction	1.1.6	Encodes NADH dehydrogenase subunit J. Its transcription is increased upon sulfur depletion.
245015_at	AtCg00490	0.100856	1.09672		4.58328	1.5176		0.149403	6.78942	0.206739	calvin cyle.rubisco large subunit	2.43e-05	0.00710608	2.25e-07	Significant Only by Age and CO2 and Interaction	1.3.1	large subunit of RUBISCO.
254502_at	At4g20130	1.30895	1.15506		0.573687	0.771033		0.951298	0.416935	0.635018	calvin cyle.rubisco interacting	0.000102011	0.859836	0.00586354	Significant Only byAge and Interaction	1.3.13	PTAC14 (PLASTID TRANSCRIPTIONALLY ACTIVE14)
265076_at	At1g55490	1.29367	1.03344		0.685889	1.03069		0.840114	0.445419	0.837884	calvin cyle.rubisco interacting	0.000504789	0.948154	0.0139175	Significant Only byAge and Interaction	1.3.13	CPN60B (CHAPERONIN 60 BETA); ATP binding / protein binding / unfolded protein binding
Carbohydrate metabolism
266357_at	At2g32290	0.935057	0.493285		0.865632	0.791778		1.65284	1.53012	2.65299	degradation.starch.starch cleavage	0.000193664	0.0448044	0.588259	No Interaction significant Age CO2	2.2.2.1	BMY5 (beta-amylase 5); beta-amylase
245346_at	At4g17090	1.03613	1.49328		1.31299	1.06339		1.63451	2.07127	1.16397	degradation.starch.starch cleavage	8.28e-08	0.00201885	0.00021056	Significant Only by Age and CO2 and Interaction	2.2.2.1	CT-BMY (BETA-AMYLASE 8); beta-amylase
251935_at	At3g54090	1.43498	1.16583		0.749021	1.22696		0.73291	0.382559	0.771338	degradation.sucrose.fructokinase	2.52e-05	0.185146	0.0054589	Significant Only byAge and Interaction	2.2.1.1	pfkB-type carbohydrate kinase family protein
245998_at	At5g20830	0.589896	0.831967		1.3265	0.793242		1.22701	2.75917	1.16989	degradation.sucrose.Susy	5.46e-07	0.00585047	1.08e-05	Significant Only by Age and CO2 and Interaction	2.2.1.5	SUS1 (SUCROSE SYNTHASE 1); UDP-glycosyltransferase/ sucrose synthase
263544_at	At2g21590	1.00176	1.19478		2.07896	2.37271		1.13479	2.35505	2.25357	synthesis.starch.AGPase	9.43e-06	0.00063326	0.0027186	Significant Only by Age and CO2 and Interaction	2.1.2.1	APL4 (large subunit of AGP 4); glucose-1-phosphate adenylyltransferase
261191_at	At1g32900	1.1998	1.4067		1.91788	1.49693		1.60402	2.56402	1.70691	synthesis.starch.starch synthase	5.53e-05	0.0104781	0.0495927	Significant Only by Age and CO2 and Interaction	2.1.2.2	starch synthase, putative
Glycolysis
257217_at	At3g14940	1.22998	0.875043		0.702088	0.76952		0.830156	0.473862	0.730046	PEPCase	3.77e-05	0.0664194	0.00863116	Significant Only byAge and Interaction	4.14	ATPPC3 (PHOSPHOENOLPYRUVATE CARBOXYLASE 3); phosphoenolpyruvate carboxylase
253971_at	At4g26530	0.615758	0.432143		1.07076	0.548191		0.872741	1.51764	1.10711	aldolase	0.0600834	9.21e-07	0.00159357	Significant Only byCO2 and Interaction	4.7	fructose-bisphosphate aldolase, putative
Fermentation
263157_at	At1g54100	1.10568	1.0352		1.35837	2.07745		1.3528	1.66198	2.7148	aldehyde dehydrogenase	1.79e-05	0.0031014	0.00360535	Significant Only by Age and CO2 and Interaction	5.10	ALDH7B4 (ALDEHYDE DEHYDROGENASE 7B4); 3-chloroallyl aldehyde dehydrogenase
248138_at	At5g54960	0.801595	1.09003		1.62231	1.10928		1.33187	2.69552	1.35539	PDC	0.00044857	0.240168	0.0224552	Significant Only byAge and Interaction	5.2	PDC2 (PYRUVATE DECARBOXYLASE-2); pyruvate decarboxylase
264953_at	At1g77120	1.09528	1.5237		1.42233	1.69741		1.69323	2.19881	1.88626	ADH	1.03e-07	6e-05	0.0336594	Significant Only by Age and CO2 and Interaction	5.3	ADH1 (ALCOHOL DEHYDROGENASE 1); alcohol dehydrogenase
Gluconeogenesis/glyoxylate cycle
263986_at	At2g42790	0.676168	0.991186		1.66702	1.07271		1.10398	2.72176	1.19479	citrate synthase	3.92e-07	0.0110398	1.93e-06	Significant Only by Age and CO2 and Interaction	6.1	CSY3 (CITRATE SYNTHASE 3); citrate (SI)-synthase
Mitochondrial electron transport/ATP synthesis
244929_at	AtMg00580	0.410004	1.15901		1.5773	1.12434		0.503417	1.93667	0.488356	NADH-DH.localisation not clear	0.00933392	0.0484401	0.000341086	Significant Only by Age and CO2 and Interaction	9.1.2	NADH dehydrogenase subunit 4
255259_at	At4g05020	0.688877	1.25571		1.55208	0.974317		1.03332	2.32812	0.80176	NADH-DH.type II.external	0.0193133	0.432498	0.000361335	Significant Only byAge and Interaction	9.2.2	NDB2 (NAD(P)H DEHYDROGENASE B2); disulfide oxidoreductase
257339_s_at	AtMg00040;At2g07671;AtMg01080	0.410342	1.18949		2.23149	0.975644		0.431624	2.34722	0.354027	F1-ATPase	0.000153192	0.153954	1.93e-07	Significant Only byAge and Interaction	9.9	[ATMG00040, hypothetical protein];[AT2G07671, H+-transporting two-sector ATPase, C subunit family protein];[ATMG01080, subunit 9 of mitochondrial F0-ATPase]
266012_s_at	AtMg00410;At2g07741;AtMg01170;At2g07699	0.39321	1.0585		1.80024	0.918633		0.405076	1.85457	0.351549	F1-ATPase	0.000407873	0.143056	5.13e-05	Significant Only byAge and Interaction	9.9	[ATMG00410, ATPase subunit 6];[AT2G07741, ATPase subunit 6, putative];[ATMG01170, ATPase subunit 6]
Cell wall
247189_at	At5g65390	0.928185	1.33341		1.47892	1.75333		0.36918	0.588232	0.485443	cell wall proteins.AGPs	5.66e-11	1.24e-06	0.0010885	Significant Only by Age and CO2 and Interaction	10.5.1	AGP7 (Arabinogalactan protein 7)
267260_at	At2g23130	1.85386	1.07478		0.380981	1.09892		1.04141	0.214017	1.0648	cell wall proteins.AGPs	8.42e-06	0.349171	2.64e-07	Significant Only byAge and Interaction	10.5.1	AGP17 (ARABINOGALACTAN PROTEIN 17)
263031_at	At1g24070	2.14943	1.9426		1.36347	1.79077		2.04676	1.29834	1.88678	cellulose synthesis	3.77e-06	2.49e-05	0.0274493	Significant Only by Age and CO2 and Interaction	10.2	ATCSLA10 (Cellulose synthase-like A10); transferase, transferring glycosyl groups
262109_at	At1g02730	0.807609	1.02296		0.883202	0.735156		0.621027	0.679155	0.446303	cellulose synthesis.cellulose synthase	4.34e-07	0.063187	0.0296123	Significant Only byAge and Interaction	10.2.1	ATCSLD5 (Cellulose synthase-like D5); cellulose synthase
253666_at	At4g30270	1.10099	2.15524		1.67082	1.75474		1.23619	1.876	1.00648	degradation.mannan-xylose-arabinose-fucose	0.0109478	0.000147291	0.0339953	Significant Only by Age and CO2 and Interaction	10.6.2	MERI5B (MERISTEM-5); hydrolase, acting on glycosyl bonds
245196_at	At1g67750	0.549778	0.994411		1.26898	0.785942		1.20856	2.78954	0.955194	degradation.pectate lyases and polygalacturonases	0.000735774	0.470517	0.000932274	Significant Only byAge and Interaction	10.6.3	pectate lyase family protein
250669_at	At5g06870	1.39041	1.68796		2.15151	2.08051		0.909586	1.40748	1.12112	degradation.pectate lyases and polygalacturonases	0.0925382	0.000262134	0.138356	CO2 Regulated only	10.6.3	PGIP2 (POLYGALACTURONASE INHIBITING PROTEIN 2); protein binding
257735_at	At3g27400	1.10712	1.45082		2.51322	1.55645		1.9418	4.40797	2.08319	degradation.pectate lyases and polygalacturonases	1.5e-08	1.75e-05	2.23e-05	Significant Only by Age and CO2 and Interaction	10.6.3	pectate lyase family protein
252563_at	At3g45970	1.18909	2.26785		2.38991	4.35461		0.633773	1.2738	1.21694	modification	0.475375	6.3e-05	0.231621	CO2 Regulated only	10.7	ATEXLA1 (ARABIDOPSIS THALIANA EXPANSIN-LIKE A1)
252607_at	At3g44990	0.741659	0.748922		0.815123	0.625696		0.440953	0.484631	0.3684	modification	8.91e-08	0.00337079	0.259541	No Interaction significant Age CO2	10.7	XTR8 (xyloglucan:xyloglucosyl transferase 8); hydrolase, acting on glycosyl bonds
253040_at	At4g37800	0.857832	1.16932		1.73346	1.13652		0.462558	0.93471	0.449584	modification	2.37e-06	0.158808	0.0008598	Significant Only byAge and Interaction	10.7	xyloglucan:xyloglucosyl transferase, putative / xyloglucan endotransglycosylase, putative / endo-xyloglucan transferase, putative
246682_at	At5g33290	0.983575	1.3441		1.6316	1.41868		1.43148	2.37461	1.51092	pectin synthesis	2.52e-05	0.015566	0.0287135	Significant Only by Age and CO2 and Interaction	10.4	XGD1 (XYLOGALACTURONAN DEFICIENT 1); catalytic
248263_at	At5g53370	0.708851	1.08394		1.22404	0.939906		1.63111	2.81658	1.41437	pectin*esterases.misc	4.8e-06	0.929479	0.0131416	Significant Only byAge and Interaction	10.8.99	pectinesterase family protein
255524_at	At4g02330	0.995558	2.36424		1.38955	1.38493		1.333	1.86054	0.780848	pectin*esterases.misc	0.128033	0.000338532	0.00489911	Significant Only byCO2 and Interaction	10.8.99	pectinesterase family protein
252740_at	At3g43270	0.850215	1.50661		2.12065	1.58794		0.973563	2.4283	1.02612	pectin*esterases.PME	0.00151404	0.00164758	0.000390201	Significant Only by Age and CO2 and Interaction	10.8.1	pectinesterase family protein
245052_at	At2g26440	0.648062	0.885649		1.38877	0.787943		1.90587	4.08419	1.69561	pectin*esterases.PME	6.44e-05	0.208448	0.0329543	Significant Only byAge and Interaction	10.8.1	pectinesterase family protein
Lipid metabolism
253309_at	At4g33790	1.48058	0.926899		0.644504	0.656162		2.22901	0.970299	1.57794	lipid degradation.beta-oxidation.acyl CoA reductase	1.69e-06	0.000814185	1.89e-05	Significant Only by Age and CO2 and Interaction	11.9.4.13	acyl CoA reductase, putative
249895_at	At5g22500	1.11985	1.18421		1.47695	2.49297		0.667014	0.879711	1.40418	lipid degradation.beta-oxidation.acyl CoA reductase	0.962054	0.000119466	0.00224232	Significant Only byCO2 and Interaction	11.9.4.13	acyl CoA reductase, putative / male-sterility protein, putative
258270_at	At3g15650	1.32189	1.18616		1.87147	1.35417		1.60488	2.27212	1.8322	lipid degradation.lysophospholipases.carboxylesterase	8.01e-05	0.00927128	0.0977278	No Interaction significant Age CO2	11.9.3.2	phospholipase/carboxylesterase family protein
258430_at	At3g16785	0.544427	0.884746		1.53466	0.910433		0.751207	2.11755	0.773018	lipid degradation.lysophospholipases.phospholipase D	0.281408	0.300587	9.67e-06	Significant Only by Interaction	11.9.3.1	PLDP1 (PHOSPHOLIPASE D ZETA1); phospholipase D
247717_at	At5g59320	1.59182	0.981814		1.748	2.56896		2.06363	2.26609	5.39958	lipid transfer proteins etc	3.99e-07	0.000643763	0.000534866	Significant Only by Age and CO2 and Interaction	11.6	LTP3 (LIPID TRANSFER PROTEIN 3); lipid binding
247718_at	At5g59310	1.62246	1.00113		4.94814	6.97804		2.60563	7.94659	18.1616	lipid transfer proteins etc	8.53e-09	4.01e-06	4.78e-06	Significant Only by Age and CO2 and Interaction	11.6	LTP4 (LIPID TRANSFER PROTEIN 4); lipid binding
258675_at	At3g08770	1.0985	0.876921		0.589054	0.859652		0.905539	0.485581	0.887707	lipid transfer proteins etc	6.73e-05	0.0402653	0.000842841	Significant Only by Age and CO2 and Interaction	11.6	LTP6 (Lipid transfer protein 6); lipid binding
257175_s_at	At3g23480;At3g23470	1.14931	1.04977		0.569702	0.714717		2.65103	1.31409	1.8049	Phospholipid synthesis.cyclopropane-fatty-acyl-phospholipid synthase	0.000131546	0.0926289	0.0300694	Significant Only byAge and Interaction	11.3.7	[AT3G23480, cyclopropane fatty acid synthase-related];[AT3G23470, cyclopropane-fatty-acyl-phospholipid synthase]
258125_s_at	At3g23530;At3g23510	0.563414	0.847284		1.33898	0.949201		0.433908	1.0312	0.486101	Phospholipid synthesis.cyclopropane-fatty-acyl-phospholipid synthase	7.15e-05	0.142723	0.00262644	Significant Only byAge and Interaction	11.3.7	[AT3G23530, cyclopropane fatty acid synthase, putative / CPA-FA synthase, putative];[AT3G23510, cyclopropane fatty acid synthase, putative / CPA-FA synthase, putative]
250556_at	At5g07920	0.649376	1.07157		1.47475	1.31669		1.03593	2.35263	1.27291	Phospholipid synthesis.diacylglycerol kinase	0.00085745	0.234219	0.0078639	Significant Only byAge and Interaction	11.3.5	DGK1 (DIACYLGLYCEROL KINASE 1, DIACYLGLYCEROL KINASE1); diacylglycerol kinase
248050_at	At5g56100	0.632222	0.72658		1.47605	1.10867		0.344345	0.803946	0.525427	TAG synthesis	6.97e-05	0.292351	0.0160594	Significant Only byAge and Interaction	11.4	glycine-rich protein / oleosin
Nirogen and amino acid metabolism
259681_at	At1g77760	0.436171	0.843905		0.984148	0.748378		0.708228	1.598	0.628059	N-metabolism.nitrate metabolism.NR	0.0348856	0.00141838	0.000524508	Significant Only by Age and CO2 and Interaction	12.1.1	NIA1 (NITRATE REDUCTASE 1)
256361_at	At1g66520	1.42966	1.06512		0.883301	1.1473		0.697073	0.43068	0.750852	degradation.aspartate family.methionine	9.56e-07	0.047629	0.00125318	Significant Only by Age and CO2 and Interaction	13.2.3.4	PDE194 (PIGMENT DEFECTIVE 194); formyltetrahydrofolate deformylase/ hydroxymethyl-, formyl- and related transferase
257315_at	At3g30775	0.844421	1.16252		2.25814	1.59322		0.856273	2.28983	1.17351	degradation.glutamate family.proline	0.000411444	0.00133624	0.000107427	Significant Only by Age and CO2 and Interaction	13.2.2.2	ERD5 (EARLY RESPONSIVE TO DEHYDRATION 5, PROLINE OXIDASE); proline dehydrogenase
263897_at	At2g21940	1.58456	1.05456		0.839343	0.966133		2.15153	1.13967	1.97112	synthesis.aromatic aa.chorismate.shikimate kinase	0.000113529	0.719129	0.041772	Significant Only byAge and Interaction	13.1.6.1.5	shikimate kinase, putative
258365_s_at	At5g11880;At3g14390	1.40694	1.10192		0.798822	1.22419		0.844356	0.479402	0.938044	synthesis.aspartate family.lysine.diaminopimelate decarboxylase	0.000161164	0.143632	0.0011874	Significant Only byAge and Interaction	13.1.3.5.5	[AT5G11880, diaminopimelate decarboxylase, putative / DAP carboxylase, putative];[AT3G14390, diaminopimelate decarboxylase, putative / DAP carboxylase, putative]
258322_at	At3g22740	1.50343	1.44447		1.3503	1.54455		2.13643	1.91883	2.28445	synthesis.aspartate family.methionine.homocysteine S-methyltransferase	9.77e-08	0.000688459	0.110752	No Interaction significant Age CO2	13.1.3.4.12	HMT3 (Homocysteine S-methyltransferase 3); homocysteine S-methyltransferase
246265_at	At1g31860	1.2218	1.05356		0.638875	0.87632		0.90379	0.47259	0.751743	synthesis.histidine.phosphoribosyl-ATP diphosphatase	9.53e-05	0.768756	0.00693323	Significant Only byAge and Interaction	13.1.7.2	AT-IE (Arabidopsis thaliana bifunctional HisI-HisE protein)
259403_at	At1g17745	0.555433	1.01383		1.63793	1.09162		1.52125	4.48606	1.63799	synthesis.serine-glycine-cysteine group.serine.phosphoglycerate dehydrogenase	2.66e-05	0.402742	0.00560717	Significant Only byAge and Interaction	13.1.5.1.1	PGDH (3-PHOSPHOGLYCERATE DEHYDROGENASE); phosphoglycerate dehydrogenase
254232_at	At4g23600	1.63421	1.62099		2.08908	2.48835		1.1989	1.53261	1.84041	transaminase. degradation.aromatic aa.tyrosine	0.00014294	5.56e-05	0.0239165	Significant Only by Age and CO2 and Interaction	13.2.6.2	CORI3 (CORONATINE INDUCED 1, JASMONIC ACID RESPONSIVE 2); transaminase
Metal handling
247604_at	At5g60950	0.664079	1.0605		1.42491	0.808376		1.99385	4.27818	1.51982	metal handling	0.000127515	0.34253	0.0311355	Significant Only byAge and Interaction	15	phytochelatin synthetase-related
246429_at	At5g17450	1.02641	0.683197		0.770652	0.98821		1.4673	1.10169	2.12238	binding, chelation and storage	0.000222069	0.247499	0.0266002	Significant Only byAge and Interaction	15.2	heavy-metal-associated domain-containing protein / copper chaperone (CCH)-related
259632_at	At1g56430	0.712249	1.08947		0.974742	0.839477		0.599523	0.820473	0.461954	binding, chelation and storage	9.09e-05	0.133479	0.0402025	Significant Only byAge and Interaction	15.2	nicotianamine synthase, putative
Secondary metabolism
256924_at	At3g29590	1.22435	1.09075		2.09957	1.44947		0.67667	1.16038	0.899206	flavonoids.anthocyanins.anthocyanin 5-aromatic acyltransferase	0.240547	0.000176906	0.0195369	Significant Only byCO2 and Interaction	16.8.1.21	AT5MAT; O-malonyltransferase/ transferase
260982_at	At1g53520	1.36907	0.962629		0.864727	1.29023		0.760066	0.480071	1.01873	flavonoids.chalcones	0.00010903	0.173865	0.000545145	Significant Only byAge and Interaction	16.8.2	chalcone-flavanone isomerase-related
248185_at	At5g54060	0.975572	1.15355		2.67177	1.3165		0.856814	2.34653	0.977847	flavonoids.dihydroflavonols	0.00904126	0.00160386	0.000631086	Significant Only by Age and CO2 and Interaction	16.8.3	UF3GT (UDP-GLUCOSE:FLAVONOID 3-O-GLUCOSYLTRANSFERASE); transferase, transferring glycosyl groups
250558_at	At5g07990	1.52271	1.4214		3.0671	1.71932		1.26059	2.53912	1.5248	flavonoids.dihydroflavonols.flavonoid 3'-monooxygenase	0.000790117	0.000972771	0.0135189	Significant Only by Age and CO2 and Interaction	16.8.3.3	TT7 (TRANSPARENT TESTA 7); flavonoid 3'-monooxygenase/ oxygen binding
252114_at	At3g51450	1.63733	1.44803		1.43382	1.62086		1.93142	1.69134	2.16195	N misc.alkaloid-like	6.46e-07	0.000446398	0.0940555	No Interaction significant Age CO2	16.4.1	strictosidine synthase family protein
263382_at	At2g40230	0.748519	1.07939		1.51019	0.915669		1.03357	2.08531	0.876799	phenylpropanoids	0.0044696	0.195598	0.000226709	Significant Only byAge and Interaction	16.2.99	transferase family protein
253277_at	At4g34230	0.825803	1.5905		1.88635	2.03457		1.22638	2.80137	1.56878	phenylpropanoids.lignin biosynthesis.CAD	0.000153271	0.00184217	0.0244967	Significant Only by Age and CO2 and Interaction	16.2.1.10	CAD5 (CINNAMYL ALCOHOL DEHYDROGENASE 5); cinnamyl-alcohol dehydrogenase
250837_at	At5g04620	1.50105	0.83188		0.63379	1.04184		0.979595	0.413617	1.22683	unspecified	0.00399321	0.294524	6.47e-05	Significant Only byAge and Interaction	16.99	ATBIOF; transaminase
Hormone metabolism
250279_at	At5g13200	0.925624	1.4349		1.34669	1.67931		1.86914	2.71942	2.18751	abscisic acid.induced-regulated-responsive-activated	1.17e-06	0.00237672	0.0975165	No Interaction significant Age CO2	17.1.3	GRAM domain-containing protein / ABA-responsive protein-related
246481_s_at	At5g15960;At5g15970	1.00809	0.729871		0.818426	0.908036		1.64849	1.33833	2.05089	abscisic acid.induced-regulated-responsive-activated	3.6e-07	0.0342802	0.0312015	Significant Only by Age and CO2 and Interaction	17.1.3	[AT5G15960, KIN1];[AT5G15970, KIN2 (COLD-RESPONSIVE 6.6)]
254564_at	At4g19170	0.430452	0.567017		1.35379	0.703675		0.898496	2.82582	1.11504	abscisic acid.synthesis-degradation.synthesis.9-cis-epoxycarotenoid dioxygenase	0.00341236	0.00434618	0.000446771	Significant Only by Age and CO2 and Interaction	17.1.1.1.10	NCED4 (NINE-CIS-EPOXYCAROTENOID DIOXYGENASE 4)
264016_at	At2g21220	1.29918	3.5905		0.967676	1.79812		1.21492	0.904919	0.608432	auxin.induced-regulated-responsive-activated	0.134489	0.000269041	0.0735656	CO2 Regulated only	17.2.3	auxin-responsive protein, putative
245971_at	At5g20730	0.584678	0.769357		1.40225	0.914566		0.873077	2.09393	1.03786	auxin.induced-regulated-responsive-activated	0.0104112	0.129549	0.000482311	Significant Only byAge and Interaction	17.2.3	NPH4 (NON-PHOTOTROPHIC HYPOCOTYL); transcription factor
248163_at	At5g54510	0.486222	0.896274		1.55886	1.02374		0.443431	1.42167	0.506496	auxin.induced-regulated-responsive-activated	0.000195805	0.131548	8.98e-05	Significant Only byAge and Interaction	17.2.3	DFL1 (DWARF IN LIGHT 1); indole-3-acetic acid amido synthetase
259128_at	At3g02260	0.425262	0.90729		1.59249	0.791848		0.569498	2.13262	0.497036	auxin.signal transduction	0.00549247	0.0622408	5.91e-07	Significant Only byAge and Interaction	17.2.2	BIG (DARK OVER-EXPRESSION OF CAB 1); binding / ubiquitin-protein ligase/ zinc ion binding
257938_at	At3g19820	0.769802	1.07912		1.23271	0.960966		0.558213	0.893882	0.497093	brassinosteroid.synthesis-degradation.sterols.DWF1	6.9e-06	0.412629	0.00443887	Significant Only byAge and Interaction	17.3.1.2.8	DWF1 (DIMINUTO 1); catalytic
251221_at	At3g62550	0.721816	0.486937		0.956145	0.702566		0.980306	1.29855	1.41441	ethylene.induced-regulated-responsive-activated	0.00905473	2.12e-05	0.077222	No Interaction significant Age CO2	17.5.3	universal stress protein (USP) family protein
264708_at	At1g09740	1.12579	1.01617		0.975175	1.44199		1.68333	1.45812	2.38872	ethylene.induced-regulated-responsive-activated	1.57e-06	0.0173579	0.00751948	Significant Only by Age and CO2 and Interaction	17.5.3	ethylene-responsive protein, putative
258727_at	At3g11930	0.775289	0.802564		1.48507	1.38167		0.493899	0.946064	0.85028	ethylene.induced-regulated-responsive-activated	1.15e-06	0.925343	1.25e-05	Significant Only byAge and Interaction	17.5.3	universal stress protein (USP) family protein
255437_at	At4g03060	1.67368	1.25735		0.593123	0.968942		2.21928	0.786476	1.71023	gibberelin.synthesis-degradation	2.44e-07	0.0333434	2.01e-07	Significant Only by Age and CO2 and Interaction	17.6.1	AOP2 (ALKENYL HYDROXALKYL PRODUCING 2); oxidoreductase, acting on paired donors, with incorporation or reduction of molecular oxygen, 2-oxoglutarate as one donor, and incorporation of one atom each of oxygen into both donors
259327_at	At3g16460	1.17409	1.72506		1.60612	2.01922		0.696638	0.95298	0.815431	jasmonate.induced-regulated-responsive-activated	0.0301616	0.000133101	0.446169	No Interaction significant Age CO2	17.7.3	jacalin lectin family protein
259382_s_at	At3g16430;At3g16420	1.05086	2.28133		1.24749	2.09059		0.515705	0.612198	0.472586	jasmonate.induced-regulated-responsive-activated	4.09e-05	3.11e-05	0.0238162	Significant Only by Age and CO2 and Interaction	17.7.3	[AT3G16430, jacalin lectin family protein];[AT3G16420, PBP1 (PYK10-BINDING PROTEIN 1)]
259383_at	At3g16470	1.25639	2.06417		2.19969	2.14823		0.944524	1.65367	0.982986	jasmonate.induced-regulated-responsive-activated	0.088489	7.96e-05	0.0288177	Significant Only byCO2 and Interaction	17.7.3	JR1 (Jacalin lectin family protein)
261037_at	At1g17420	1.29306	1.61559		2.25821	1.85168		0.934449	1.63193	1.071	jasmonate.synthesis-degradation.lipoxygenase	0.0352041	0.000461747	0.027875	Significant Only by Age and CO2 and Interaction	17.7.1.2	LOX3 (Lipoxygenase 3); iron ion binding / lipoxygenase
Co-factor and vitamine metabolism
267138_s_at	At2g38230;At2g38210	0.58969	0.932887		1.26964	0.581325		0.761039	1.63856	0.474239	Co-factor and vitamine metabolism	0.0942892	0.0900439	0.000431967	Significant Only by Interaction	18	[AT2G38230, ATPDX1.1 (PYRIDOXINE BIOSYNTHESIS 1.1); protein heterodimerization];[AT2G38210, ethylene-responsive protein, putative]
266888_s_at	At2g44750;At1g02880	1.40489	0.985237		0.715576	1.16214		2.10368	1.07151	2.4814	thiamine.thiamine diphosphokinase	2.38e-05	0.311399	0.00368181	Significant Only byAge and Interaction	18.2.1	[AT2G44750, thiamin pyrophosphokinase, putative];[AT1G02880, thiamin pyrophosphokinase, putative]
246565_at	At5g15530	0.862979	0.682495		0.700667	0.930258		0.602956	0.489549	0.821844	biotin	0.0001202	0.0489165	0.0857457	No Interaction significant Age CO2	18.6	BCCP2 (biotin carboxyl carrier protein 2); biotin binding
Tetrapyrrole synthesis
256728_at	At3g25660	1.59239	0.867954		0.708795	1.00127		0.906368	0.403437	1.04558	glu-tRNA synthetase	2.47e-06	0.00158284	5.85e-07	Significant Only by Age and CO2 and Interaction	19.1	glutamyl-tRNA(Gln) amidotransferase, putative
255826_at	At2g40490	1.35086	0.975351		0.67334	1.01461		0.962719	0.47987	1.00147	uroporphyrinogen decarboxylase	0.000264288	0.917597	8.96e-05	Significant Only byAge and Interaction	19.7	HEME2; uroporphyrinogen decarboxylase
Stress
263495_at	At2g42530	0.993615	0.614174		0.506694	0.656973		2.15818	1.10056	2.30857	abiotic.cold	7.48e-07	5.47e-05	0.000253573	Significant Only by Age and CO2 and Interaction	20.2.2	cold-responsive protein / cold-regulated protein (cor15b)
264389_at	At1g11960	1.51803	2.17811		1.57864	2.20229		1.23045	1.27958	1.24412	abiotic.drought/salt	0.00574903	3.64e-06	0.586252	No Interaction significant Age CO2	20.2.3	early-responsive to dehydration protein-related / ERD protein-related
249850_at	At5g23240;At5g23235	1.27458	0.691378		0.75477	0.693097		2.1652	1.28216	2.17058	abiotic.heat	5.45e-06	0.00538007	0.0219609	Significant Only by Age and CO2 and Interaction	20.2.1	[AT5G23240, DNAJ heat shock N-terminal domain-containing protein]
254592_at	At4g18880	0.538085	0.849761		1.44072	0.876686		1.32334	3.54325	1.36527	abiotic.heat	0.000396834	0.437391	0.0122582	Significant Only byAge and Interaction	20.2.1	AT-HSFA4A (Arabidopsis thaliana heat shock transcription factor A4A); DNA binding / transcription factor
263483_at	At2g04030	1.4071	1.11344		0.729721	1.22582		0.711346	0.368904	0.783145	abiotic.heat	0.000302659	0.48047	0.0282796	Significant Only byAge and Interaction	20.2.1	CR88 (EMBRYO DEFECTIVE 1956); ATP binding
259516_at	At1g20450	1.44567	1.64733		1.33246	1.70485		1.97705	1.82223	2.04608	abiotic.unspecified	1.06e-05	0.00208606	0.256242	No Interaction significant Age CO2	20.2.99	ERD10/LTI45 (EARLY RESPONSIVE TO DEHYDRATION 10)
259570_at	At1g20440	1.08622	1.42262		1.33657	1.76182		2.0344	2.50327	2.51947	abiotic.unspecified	5.07e-07	0.00140984	0.0515124	No Interaction significant Age CO2	20.2.99	COR47 (cold regulated 47)
252102_at	At3g50970	1.40578	2.1671		2.32587	3.77458		3.78509	6.26242	6.59273	abiotic.unspecified	1.32e-07	5.58e-05	0.000437613	Significant Only by Age and CO2 and Interaction	20.2.99	LTI30/XERO2 (LOW TEMPERATURE-INDUCED 30)
247095_at	At5g66400	0.819469	0.564148		2.60039	3.41213		1.96563	6.23746	11.8887	abiotic.unspecified	3.52e-05	0.0336925	0.0124596	Significant Only by Age and CO2 and Interaction	20.2.99	RAB18 (RESPONSIVE TO ABA 18)
258791_at	At3g04720	1.50933	2.20561		2.08051	2.11923		1.94011	2.67432	1.86413	biotic	4.32e-05	0.00110147	0.116321	No Interaction significant Age CO2	20.1	PR4 (PATHOGENESIS-RELATED 4)
260077_at	At1g73620	0.693289	0.960891		0.892395	1.06753		0.479994	0.617843	0.533263	biotic	5.15e-06	0.0265396	0.170969	No Interaction significant Age CO2	20.1	thaumatin-like protein, putative / pathogenesis-related protein, putative
245456_at	At4g16950	0.57539	0.937825		1.46044	0.987879		0.821486	2.08507	0.865331	biotic	0.0822758	0.869782	0.00011228	Significant Only by Interaction	20.1	RPP5 (RECOGNITION OF PERONOSPORA PARASITICA 5)
258544_at	At3g07040	0.582878	0.994321		1.36953	0.697177		0.677955	1.59293	0.475354	biotic	0.00271549	0.163217	9.42e-06	Significant Only byAge and Interaction	20.1	RPM1 (RESISTANCE TO P. SYRINGAE PV MACULICOLA 1)
259925_at	At1g75040	0.539942	1.21595		1.12952	0.538596		2.83851	5.93798	1.2573	biotic	0.000516643	0.380201	0.0448835	Significant Only byAge and Interaction	20.1	PR5 (PATHOGENESIS-RELATED GENE 5)
258893_at	At3g05660	0.978286	1.0165		1.54838	0.974062		1.57383	2.49097	1.50812	biotic.kinases	4.11e-06	0.00941208	0.00593051	Significant Only by Age and CO2 and Interaction	20.1.4	kinase/ protein binding
260312_at	At1g63880	0.64977	0.966346		1.78044	0.915353		0.838995	2.29894	0.794722	biotic.PR-proteins	0.00282957	0.00601745	4.55e-07	Significant Only by Age and CO2 and Interaction	20.1.7	disease resistance protein (TIR-NBS-LRR class), putative
265297_at	At2g14080	0.735358	0.980917		1.87215	0.991211		0.87398	2.22507	0.883152	biotic.PR-proteins	0.0074923	0.0142558	5.62e-05	Significant Only by Age and CO2 and Interaction	20.1.7	disease resistance protein (TIR-NBS-LRR class), putative
258894_at	At3g05650	0.697165	1.04755		1.13039	0.705409		2.03411	3.29812	1.36974	biotic.PR-proteins	3.76e-07	0.0827516	0.00136544	Significant Only byAge and Interaction	20.1.7	disease resistance family protein
249052_at	At5g44420	2.83403	3.44125		3.97044	2.71307		7.827	10.9655	6.17076	biotic.PR-proteins.plant defensins	1.65e-06	0.00100286	0.00372707	Significant Only by Age and CO2 and Interaction	20.1.7.12	PDF1.2 (Low-molecular-weight cysteine-rich 77)
260551_at	At2g43510	2.44854	3.44314		1.9209	3.32825		3.0746	2.41204	2.97201	biotic.PR-proteins.plant defensins	9.59e-08	6.67e-07	0.000580198	Significant Only by Age and CO2 and Interaction	20.1.7.12	ATTI1 (ARABIDOPSIS THALIANA TRYPSIN INHIBITOR PROTEIN 1)
257365_x_at	At2g26020	3.49638	2.99944		2.93305	1.80688		9.55206	8.01306	5.75422	biotic.PR-proteins.plant defensins	1.68e-06	0.0019203	0.0119072	Significant Only by Age and CO2 and Interaction	20.1.7.12	PDF1.2b (plant defensin 1.2b)
248994_at	At5g45250	0.746611	0.813095		1.52306	0.862718		1.05682	2.15588	1.12132	biotic.receptors	0.000915135	0.0201203	0.00170019	Significant Only by Age and CO2 and Interaction	20.1.2	RPS4 (RESISTANT TO P. SYRINGAE 4)
248995_at	At5g45260	0.613839	0.874504		1.19089	0.771192		1.13814	2.20808	1.00369	biotic.regulation of transcription	0.00071531	0.0921169	0.00132941	Significant Only byAge and Interaction	20.1.5	SLH1 (sensitive to low humidity 1); transcription factor
Redox
253708_at	At4g29210	0.821029	1.08848		1.34066	0.973761		1.23199	2.01172	1.10215	ascorbate and glutathione.glutathione	0.000275997	0.437236	0.00545231	Significant Only byAge and Interaction	21.2.2	GGT3 (GAMMA-GLUTAMYL TRANSPEPTIDASE 3); gamma-glutamyltransferase/ glutathione gamma-glutamylcysteinyltransferase
248493_at	At5g51100	1.30468	0.953239		0.696871	1.05198		0.75317	0.402293	0.831191	dismutases and catalases	5.23e-05	0.844433	0.0041998	Significant Only byAge and Interaction	21.6	FSD2 (FE SUPEROXIDE DISMUTASE 2); iron superoxide dismutase
250260_at	At5g13810	0.715214	0.903156		1.51179	1.02788		0.986281	2.08476	1.12249	glutaredoxins	0.000352861	0.156082	0.00029966	Significant Only byAge and Interaction	21.4	glutaredoxin family protein
258087_at	At3g26060	1.30687	0.743445		0.583667	0.828924		1.07288	0.479164	1.19624	peroxiredoxin	0.00126137	0.00117743	1.28e-06	Significant Only by Age and CO2 and Interaction	21.5	peroxiredoxin Q, putative
Nucleotide metabolism
251830_at	At3g55010	1.42411	1.24466		0.671149	1.15383		0.814908	0.384047	0.755436	synthesis.purine.AIR synthase	1.24e-05	0.100731	0.00187133	Significant Only byAge and Interaction	23.1.2.5	phosphoribosylformylglycinamidine cyclo-ligase, chloroplast / phosphoribosyl-aminoimidazole synthetase / AIR synthase (PUR5)
262274_at	At1g68720	0.546506	1.02058		2.02262	1.1078		0.469769	1.73862	0.509918	degradation	0.000644623	0.81648	2.68e-06	Significant Only byAge and Interaction	23.2	cytidine/deoxycytidylate deaminase family protein
247376_at	At5g63310	1.20732	0.92264		0.613455	0.979874		0.861064	0.437517	0.914479	phosphotransfer and pyrophosphatases.nucleoside diphosphate kinase	0.000189519	0.649461	0.00166433	Significant Only byAge and Interaction	23.4.10	NDPK2 (NUCLEOSIDE DIPHOSPHATE KINASE 2); ATP binding / nucleoside diphosphate kinase
255587_at	At4g01480	1.06731	1.35476		1.29892	1.17135		1.83895	2.23801	1.58999	phosphotransfer and pyrophosphatases.misc	9.82e-09	0.00396273	0.0198449	Significant Only by Age and CO2 and Interaction	23.4.99	inorganic pyrophosphatase, putative (soluble) / pyrophosphate phospho-hydrolase, putative / PPase, putative
C1-metabolism
260126_at	At1g36370	2.19615	1.27921		0.64944	1.77676		1.66537	0.492481	2.31312	glycine hydroxymethyltransferase	0.00230688	0.000217593	6.31e-07	Significant Only by Age and CO2 and Interaction	25.1	SHM7 (serine hydroxymethyltransferase 7); glycine hydroxymethyltransferase
255685_s_at	At4g00620;At4g00600	1.08577	1.37301		0.852574	1.37188		0.633618	0.497535	0.633098	Methylenetetrahydrofolate dehydrogenase & Methenyltetrahydrofolate cyclohydrolase	0.000155096	0.0201926	0.687696	No Interaction significant Age CO2	25.5	[AT4G00620, tetrahydrofolate dehydrogenase/cyclohydrolase, putative];[AT4G00600, tetrahydrofolate dehydrogenase/cyclohydrolase, putative]
258782_at	At3g11750	1.5167	1.11906		0.482683	0.775504		1.36017	0.432867	0.942595	dihydroneopterin aldolase	0.0643505	0.645664	0.000543315	Significant Only by Interaction	25.9	dihydroneopterin aldolase, putative
Miscelleneous
258158_at	At3g17790	0.70669	1.52966		1.64969	1.70308		1.20438	2.81149	1.34092	acid and other phosphatases	0.000920307	0.0100536	0.0381683	Significant Only by Age and CO2 and Interaction	26.13	ATACP5 (acid phosphatase 5); acid phosphatase/ protein serine/threonine phosphatase
260282_at	At1g80410	0.669207	1.08074		1.32112	0.95282		0.546301	1.07848	0.481639	acyl transferases	4.79e-09	0.00527853	1.6e-07	Significant Only by Age and CO2 and Interaction	26.5	EMB2753 (EMBRYO DEFECTIVE 2753); binding
253073_at	At4g37410	1.49788	3.71616		6.0697	5.6655		0.664552	2.69288	1.01315	cytochrome P450	0.0307505	1.78e-05	0.00476213	Significant Only by Age and CO2 and Interaction	26.10	CYP81F4 (cytochrome P450, family 81, subfamily F, polypeptide 4); oxygen binding
258063_at	At3g14620	0.67148	0.956038		1.02068	0.7072		1.58257	2.40557	1.17066	cytochrome P450	2.97e-05	0.0953311	0.0107946	Significant Only byAge and Interaction	26.10	CYP72A8 (cytochrome P450, family 72, subfamily A, polypeptide 8); oxygen binding
259058_at	At3g03470	0.71133	0.912714		1.49712	1.32672		1.82062	3.83181	2.64644	cytochrome P450	7.51e-07	0.261454	0.0265986	Significant Only byAge and Interaction	26.10	CYP89A9 (cytochrome P450, family 87, subfamily A, polypeptide 9); oxygen binding
266142_at	At2g39030	5.0373	10.151		8.09654	10.0532		2.1133	3.39674	2.09294	GCN5-related N-acetyltransferase	0.000197838	2.38e-05	0.0236609	Significant Only by Age and CO2 and Interaction	26.24	GCN5-related N-acetyltransferase (GNAT) family protein
256489_at	At1g31550	1.32941	1.56488		1.57492	1.30442		1.70759	2.02295	1.42337	GDSL-motif lipase	1.18e-05	0.0026968	0.0807307	No Interaction significant Age CO2	26.28	GDSL-motif lipase, putative
248118_at	At5g55050	0.845887	1.16896		1.39639	1.15509		1.38369	2.28419	1.36727	GDSL-motif lipase	7.25e-05	0.270474	0.0353178	Significant Only byAge and Interaction	26.28	GDSL-motif lipase/hydrolase family protein
259173_at	At3g03640	0.873176	1.69767		1.39291	1.56314		1.47862	2.35872	1.36144	gluco-, galacto- and mannosidases	0.000670966	0.00814678	0.226299	No Interaction significant Age CO2	26.3	GLUC (Beta-glucosidase homolog); hydrolase, hydrolyzing O-glycosyl compounds
262118_at	At1g02850	1.06526	1.31963		0.864947	1.45216		1.82154	1.47901	2.00447	gluco-, galacto- and mannosidases	0.000472635	0.0272216	0.23796	No Interaction significant Age CO2	26.3	glycosyl hydrolase family 1 protein
262230_at	At1g68560	0.662665	1.05818		1.69257	1.22863		0.487644	1.24553	0.566196	gluco-, galacto- and mannosidases	1.06e-05	0.1438	1.19e-05	Significant Only byAge and Interaction	26.3	ATXYL1/XYL1 (ALPHA-XYLOSIDASE 1); alpha-N-arabinofuranosidase/ hydrolase, hydrolyzing O-glycosyl compounds / xylan 1,4-beta-xylosidase
264898_at	At1g23205	1.21747	1.46751		0.951111	1.2176		0.562796	0.439669	0.466955	invertase/pectin methylesterase inhibitor family protein	1.09e-05	0.0495238	0.2946	No Interaction significant Age CO2	26.18	invertase/pectin methylesterase inhibitor family protein
266352_at	At2g01610	0.789056	0.882171		1.47187	1.1392		1.23169	2.29754	1.59055	invertase/pectin methylesterase inhibitor family protein	6.06e-06	0.151497	0.0042638	Significant Only byAge and Interaction	26.18	invertase/pectin methylesterase inhibitor family protein
267607_s_at	At2g26740;At2g26750	0.721472	1.14549		1.33868	1.01986		1.13362	2.10342	1.00929	misc2	1.14e-06	0.182122	1.73e-06	Significant Only byAge and Interaction	26.1	[AT2G26740, ATSEH (Arabidopsis thaliana soluble epoxide hydrolase); epoxide hydrolase];[AT2G26750, epoxide hydrolase, putative]
265053_at	At1g52000	2.49247	3.64604		2.41947	2.97496		1.91601	1.85989	1.56336	myrosinases-lectin-jacalin	4.38e-06	1.53e-07	0.0704	No Interaction significant Age CO2	26.16	jacalin lectin family protein
265058_s_at	At1g52030;At1g52040	2.26905	3.60731		3.0438	3.12407		1.9943	2.67524	1.72714	myrosinases-lectin-jacalin	3.71e-05	2.83e-05	0.0378533	Significant Only by Age and CO2 and Interaction	26.16	[AT1G52030, MBP2 (MYROSINASE-BINDING PROTEIN 2)];[AT1G52040, MBP1 (MYROSINASE-BINDING PROTEIN 1)]
266989_at	At2g39330	2.58357	3.00223		2.20703	2.70769		2.9514	2.52125	2.66185	myrosinases-lectin-jacalin	5.05e-07	1.64e-05	0.0185382	Significant Only by Age and CO2 and Interaction	26.16	jacalin lectin family protein
252677_at	At3g44320	1.38716	1.36055		1.64256	2.4005		0.624054	0.738951	1.10105	nitrilases, *nitrile lyases, berberine bridge enzymes, reticuline oxidases, troponine reductases	0.0567822	0.000640593	0.0789232	CO2 Regulated only	26.8	NIT3 (NITRILASE 3)
267123_at	At2g23560	1.48976	1.13989		1.16942	1.44417		0.61516	0.482884	0.779367	nitrilases, *nitrile lyases, berberine bridge enzymes, reticuline oxidases, troponine reductases	5.4e-05	0.0234372	0.0443328	Significant Only by Age and CO2 and Interaction	26.8	hydrolase, alpha/beta fold family protein
262376_at	At1g72970	0.788081	0.955761		1.43856	1.01458		0.495987	0.905374	0.526511	nitrilases, *nitrile lyases, berberine bridge enzymes, reticuline oxidases, troponine reductases	2.79e-07	0.855278	0.00038501	Significant Only byAge and Interaction	26.8	HTH (HOTHEAD); aldehyde-lyase
254833_s_at	At4g12290;At4g12280	0.870637	0.991114		1.14109	0.586868		2.42499	3.17828	1.43591	oxidases - copper, flavone etc.	8.73e-07	0.00704575	0.00270449	Significant Only by Age and CO2 and Interaction	26.7	[AT4G12290, copper amine oxidase, putative];[AT4G12280, copper amine oxidase family protein]
246602_at	At1g31710	0.581806	1.23323		1.58711	1.01601		0.787624	2.14855	0.648896	oxidases - copper, flavone etc.	0.920094	0.385227	0.000136616	Significant Only by Interaction	26.7	copper amine oxidase, putative
256578_at	At3g28200	0.775815	1.28678		1.21884	1.16618		0.548749	0.86211	0.497323	peroxidases	5.8e-06	0.00672132	0.0039852	Significant Only by Age and CO2 and Interaction	26.12	peroxidase, putative
248236_at	At5g53870	0.831545	1.24785		1.58657	2.42791		1.74142	3.32258	3.38822	plastocyanin-like	2.91e-05	0.00681479	0.0265301	Significant Only by Age and CO2 and Interaction	26.19	plastocyanin-like domain-containing protein
248062_at	At5g55450	0.400723	1.191		0.969188	0.533993		2.64824	6.40502	1.18735	protease inhibitor/seed storage/lipid transfer protein (LTP) family protein	6.61e-05	0.201874	0.0115599	Significant Only byAge and Interaction	26.21	protease inhibitor/seed storage/lipid transfer protein (LTP) family protein
245624_at	At4g14090	1.38289	1.39822		2.20113	1.37819		1.20725	1.92157	1.18996	UDP glucosyl and glucoronyl transferases	0.000701595	0.000324454	0.00870923	Significant Only by Age and CO2 and Interaction	26.2	UDP-glucoronosyl/UDP-glucosyl transferase family protein
262223_at	At1g74680	0.581807	0.715258		1.12375	0.695792		1.16811	2.25617	1.13632	UDP glucosyl and glucoronyl transferases	0.000103371	0.00274859	0.00150931	Significant Only by Age and CO2 and Interaction	26.2	exostosin family protein
260832_at	At1g06780	0.644549	0.961189		1.68332	1.02206		0.766302	2.00129	0.814827	UDP glucosyl and glucoronyl transferases	0.0937672	0.182286	2.95e-06	Significant Only by Interaction	26.2	GAUT6 (Galacturonosyltransferase 6); polygalacturonate 4-alpha-galacturonosyltransferase/ transferase, transferring glycosyl groups
252179_at	At3g50760	0.687193	1.16885		1.31921	1.0532		1.63462	3.13799	1.47289	UDP glucosyl and glucoronyl transferases	2.47e-06	0.592107	0.00739758	Significant Only byAge and Interaction	26.2	GATL2 (Galacturonosyltransferase-like 2); polygalacturonate 4-alpha-galacturonosyltransferase/ transferase, transferring glycosyl groups / transferase, transferring hexosyl groups
250264_at	At5g12890	0.802534	1.19834		1.28677	1.00066		1.47925	2.3718	1.23524	UDP glucosyl and glucoronyl transferases	3.71e-05	0.600088	0.0130919	Significant Only byAge and Interaction	26.2	UDP-glucoronosyl/UDP-glucosyl transferase family protein
RNA
253399_at	At4g32850	0.60538	1.1496		1.99712	1.11835		0.708596	2.33762	0.689332	processing	0.449257	0.198002	2.02e-05	Significant Only by Interaction	27.1	nPAP (NUCLEAR POLY(A) POLYMERASE); nucleotidyltransferase
246152_at	At5g20040	1.37347	0.983667		0.95469	1.21989		0.649709	0.45161	0.805736	processing	9.3e-05	0.20943	0.0270493	Significant Only byAge and Interaction	27.1	ATIPT9 (Arabidopsis thaliana isopentenyltransferase 9); ATP binding / tRNA isopentenyltransferase
261614_at	At1g49760	0.92471	1.21647		1.20122	1.01298		0.548976	0.713131	0.457144	processing	1.05e-06	0.196221	0.0255369	Significant Only byAge and Interaction	27.1	PAB8 (POLY(A) BINDING PROTEIN 8); RNA binding / translation initiation factor
266659_at	At2g25850	0.688456	0.869402		1.47422	0.911302		0.954937	2.04485	1.00096	processing	0.00512836	0.125902	0.000706449	Significant Only byAge and Interaction	27.1	nucleotidyltransferase family protein
250529_at	At5g08610	1.62423	1.33507		0.593138	0.95129		0.911717	0.332943	0.649633	processing.RNA helicase	5.87e-05	0.39077	0.00252379	Significant Only byAge and Interaction	27.1.2	DEAD box RNA helicase (RH26)
258434_at	At3g16770	1.24856	0.96151		1.1624	0.795528		2.15006	2.00169	1.7789	regulation of transcription.AP2/EREBP, APETALA2/Ethylene-responsive element binding protein family	1.97e-06	0.0130207	0.252923	No Interaction significant Age CO2	27.3.3	ATEBP/RAP2.3 (RELATED TO AP2 3); DNA binding / protein binding / transcription factor/ transcriptional activator
259793_at	At1g64380	1.83181	1.12367		1.34868	1.19491		1.94254	1.4302	2.0657	regulation of transcription.AP2/EREBP, APETALA2/Ethylene-responsive element binding protein family	2.32e-05	0.00382263	0.532693	No Interaction significant Age CO2	27.3.3	AP2 domain-containing transcription factor, putative
253405_at	At4g32800	0.974598	1.64029		1.50805	1.02488		1.41103	2.18337	0.881634	regulation of transcription.AP2/EREBP, APETALA2/Ethylene-responsive element binding protein family	0.000137145	0.00764615	9.71e-05	Significant Only by Age and CO2 and Interaction	27.3.3	AP2 domain-containing transcription factor TINY, putative
254066_at	At4g25480	0.914882	1.08935		1.24224	0.843391		2.13772	2.90263	1.65506	regulation of transcription.AP2/EREBP, APETALA2/Ethylene-responsive element binding protein family	1.5e-06	0.165831	0.0305156	Significant Only byAge and Interaction	27.3.3	DREB1A (DEHYDRATION RESPONSE ELEMENT B1A); DNA binding / transcription factor/ transcriptional activator
247468_at	At5g62000	0.641807	0.968089		1.37377	0.811234		1.03002	2.20472	0.863131	regulation of transcription.ARF, Auxin Response Factor family	0.000614559	0.10578	1.36e-05	Significant Only byAge and Interaction	27.3.4	ARF2 (AUXIN RESPONSE FACTOR 2); transcription factor
247508_at	At5g62000	0.453135	0.76569		1.9397	0.851512		0.576322	2.46702	0.640919	regulation of transcription.ARF, Auxin Response Factor family	0.828388	0.0388695	2.74e-06	Significant Only byCO2 and Interaction	27.3.4	ARF2 (AUXIN RESPONSE FACTOR 2); transcription factor
266078_at	At2g40670	1.07554	0.797992		0.638845	0.652494		2.12814	1.26406	1.74011	regulation of transcription.ARR	7.92e-05	0.0150099	0.0317438	Significant Only by Age and CO2 and Interaction	27.3.5	ARR16 (response regulator 16); transcription regulator/ two-component response regulator
263664_at	At1g04250	0.763668	1.02277		1.74397	1.43712		0.451209	1.03042	0.634007	regulation of transcription.Aux/IAA family	5.14e-06	0.107131	0.000183794	Significant Only byAge and Interaction	27.3.40	AXR3 (AUXIN RESISTANT 3); transcription factor
251575_at	At3g58120	0.879087	0.92227		1.462	1.25027		0.454534	0.75593	0.616187	regulation of transcription.bZIP transcription factor family	8.31e-07	0.669581	0.0181719	Significant Only byAge and Interaction	27.3.35	bZIP transcription factor family protein
262137_at	At1g77920	0.798601	0.803568		1.34662	1.03224		1.43696	2.42302	1.84586	regulation of transcription.bZIP transcription factor family	5.65e-06	0.206375	0.036785	Significant Only byAge and Interaction	27.3.35	bZIP family transcription factor
245428_at	At4g17570	0.609451	0.928312		1.46337	0.906793		0.870961	2.09129	0.850772	regulation of transcription.C2C2(Zn) GATA transcription factor family	0.0250228	0.377284	3.99e-05	Significant Only byAge and Interaction	27.3.9	zinc finger (GATA type) family protein
256916_at	At3g24050	1.76896	1.09488		0.459063	0.931736		2.01353	0.522531	1.7135	regulation of transcription.C2C2(Zn) GATA transcription factor family	0.00301994	0.289227	2.18e-06	Significant Only byAge and Interaction	27.3.9	GATA transcription factor 1 (GATA-1)
266695_at	At2g19810	0.618024	0.986151		1.35808	0.984302		1.20897	2.65665	1.2067	regulation of transcription.C3H zinc finger family	0.000895094	0.951721	0.0140566	Significant Only byAge and Interaction	27.3.12	zinc finger (CCCH-type) family protein
258198_at	At3g14020	1.93874	1.44677		0.867666	1.22572		2.29212	1.02582	1.94191	regulation of transcription.CCAAT box binding factor family, HAP2	0.000232822	0.112646	0.0158098	Significant Only byAge and Interaction	27.3.14	CCAAT-binding transcription factor (CBF-B/NF-YA) family protein
264936_at	At1g61140	0.543355	1.04123		1.51732	0.88533		0.787677	2.1996	0.669744	regulation of transcription.Chromatin Remodeling Factors	0.612341	0.931421	4.36e-05	Significant Only by Interaction	27.3.44	EDA16 (embryo sac development arrest 16); ATP binding / DNA binding / helicase/ protein binding / zinc ion binding
245930_at	At5g09240	1.53326	1.01353		0.687025	1.06376		1.11484	0.49954	1.17008	regulation of transcription.General Transcription	0.016269	0.446069	2.94e-05	Significant Only byAge and Interaction	27.3.50	transcriptional coactivator p15 (PC4) family protein
249309_at	At5g41410	0.711284	1.00053		1.73576	0.979592		0.919027	2.24272	0.899797	regulation of transcription.HB,Homeobox transcription factor family	0.00146521	0.0215968	1.46e-05	Significant Only by Age and CO2 and Interaction	27.3.22	BEL1 (BELL 1); DNA binding / transcription factor
251272_at	At3g61890	0.847393	1.04961		1.53297	2.0702		1.63381	2.95563	3.22246	regulation of transcription.HB,Homeobox transcription factor family	1.21e-06	0.00385572	0.00575442	Significant Only by Age and CO2 and Interaction	27.3.22	ATHB-12 (ARABIDOPSIS THALIANA HOMEOBOX PROTEIN 1); transcription factor
266327_at	At2g46680	1.04988	1.25647		1.79014	2.33981		1.87576	3.19834	3.49307	regulation of transcription.HB,Homeobox transcription factor family	1.02e-07	0.000230647	0.00122287	Significant Only by Age and CO2 and Interaction	27.3.22	ATHB-7 (ARABIDOPSIS THALIANA HOMEOBOX 7); transcription factor
263956_at	At2g35940	0.638423	1.20203		1.39496	0.858443		1.43426	3.13386	1.02429	regulation of transcription.HB,Homeobox transcription factor family	4.38e-05	0.623649	0.000377687	Significant Only byAge and Interaction	27.3.22	BLH1 (BLH1); DNA binding / transcription factor
252625_at	At3g44750	1.56636	1.38568		0.640098	1.14565		0.793574	0.324297	0.656109	regulation of transcription.HDA	3.89e-05	0.124926	0.00782315	Significant Only byAge and Interaction	27.3.55	HD2A (HISTONE DEACETYLASE 2A); nucleic acid binding / zinc ion binding
259992_at	At1g67970	0.84403	1.03037		0.905294	0.686609		2.01579	2.1621	1.34327	regulation of transcription.HSF,Heat-shock transcription factor family	5.77e-07	0.0342533	0.0101289	Significant Only by Age and CO2 and Interaction	27.3.23	AT-HSFA8 (Arabidopsis thaliana heat shock transcription factor A8); DNA binding / transcription factor
252534_at	At3g46130	1.30867	0.786851		0.491717	0.896879		1.22789	0.461365	1.39959	regulation of transcription.MYB domain transcription factor family	0.518643	0.20674	0.000408191	Significant Only by Interaction	27.3.25	MYB111 (myb domain protein 111); DNA binding / transcription factor
247696_at	At5g59780	1.59135	1.33066		0.694058	1.13286		2.42018	1.05554	2.06041	regulation of transcription.MYB domain transcription factor family	1.92e-05	0.0907455	0.003313	Significant Only byAge and Interaction	27.3.25	MYB59 (myb domain protein 59); DNA binding / transcription factor
260999_at	At1g26580	1.54122	1.06572		0.693927	0.984018		2.06122	0.928058	1.9032	regulation of transcription.MYB domain transcription factor family	0.000302459	0.921059	0.00460699	Significant Only byAge and Interaction	27.3.25	similar to myb family transcription factor / ELM2 domain-containing protein [Arabidopsis thaliana] (TAIR:AT2G03470.1); similar to Os03g0425800 [Oryza sativa (japonica cultivar-group)] (GB:NP_001050406.1); similar to expressed protein [Oryza sativa (japoni
247668_at	At5g60100	1.59105	0.87162		0.488714	0.851772		1.93479	0.5943	1.89073	regulation of transcription.Psudo ARR transcription factor family	0.000940141	0.10305	6.51e-06	Significant Only byAge and Interaction	27.3.66	APRR3 (PSEUDO-RESPONSE REGULATOR 3); transcription regulator
246809_s_at	At5g27140;At5g27120	0.852919	1.28416		1.13134	1.14172		0.532627	0.706495	0.473547	regulation of transcription.putative transcription regulator	5.19e-09	0.000247255	0.000549089	Significant Only by Age and CO2 and Interaction	27.3.67	[AT5G27140, SAR DNA-binding protein, putative];[AT5G27120, SAR DNA-binding protein, putative]
261324_at	At1g44770	0.769394	0.991271		1.48395	1.28314		1.21793	2.34905	1.57654	regulation of transcription.putative transcription regulator	7.07e-08	0.0281657	0.000136622	Significant Only by Age and CO2 and Interaction	27.3.67	similar to unknown protein [Arabidopsis thaliana] (TAIR:AT5G49710.3); similar to expressed protein [Oryza sativa (japonica cultivar-group)] (GB:ABF98409.1)
247630_at	At5g60410	0.542379	0.975145		1.85959	1.03415		0.639546	2.19274	0.678243	regulation of transcription.putative transcription regulator	0.808889	0.506699	1.19e-07	Significant Only by Interaction	27.3.67	ATSIZ1/SIZ1; DNA binding / SUMO ligase
257590_s_at	At3g24880;At3g24870	0.437749	0.790605		1.74956	1.03945		0.544862	2.17766	0.716359	regulation of transcription.putative transcription regulator	0.429938	0.494545	0.00018364	Significant Only by Interaction	27.3.67	[AT3G24880, DNA binding];[AT3G24870, DNA binding]
264460_at	At1g10170	0.62296	1.18213		1.91642	0.868825		0.641146	1.97237	0.47122	regulation of transcription.putative transcription regulator	0.0897521	0.47489	2.16e-05	Significant Only by Interaction	27.3.67	NF-X1 type zinc finger family protein
254778_at	At4g12750	0.710342	0.985159		1.32482	0.943962		0.515342	0.961133	0.493791	regulation of transcription.putative transcription regulator	0.000100053	0.701441	0.0104277	Significant Only byAge and Interaction	27.3.67	DNA binding / sequence-specific DNA binding / transcription factor
262798_at	At1g20980	0.60265	1.05383		1.7908	1.05039		0.743041	2.20797	0.74061	regulation of transcription.SBP,Squamosa promoter binding protein family	0.101253	0.154622	1.19e-07	Significant Only by Interaction	27.3.28	SPL14 (SQUAMOSA PROMOTER BINDING PROTEIN-LIKE 14); DNA binding / transcription factor
252402_s_at	At3g48060;At3g48050	0.436616	0.89586		2.13625	0.927128		0.503883	2.46537	0.52147	regulation of transcription.unclassified	0.103998	0.468502	2.25e-06	Significant Only by Interaction	27.3.99	[AT3G48060, bromo-adjacent homology (BAH) domain-containing protein];[AT3G48050, bromo-adjacent homology (BAH) domain-containing protein]
247693_at	At5g59730	0.731012	1.08145		1.46018	1.14865		1.19517	2.38733	1.26944	regulation of transcription.unclassified	2.55e-05	0.280474	0.0015617	Significant Only byAge and Interaction	27.3.99	ATEXO70H7 (EXOCYST SUBUNIT EXO70 FAMILY PROTEIN H7); protein binding
250554_at	At5g07900	1.19173	1.05783		0.732277	1.05008		0.780521	0.479605	0.774799	regulation of transcription.unclassified	3.81e-05	0.684714	0.0226656	Significant Only byAge and Interaction	27.3.99	mitochondrial transcription termination factor family protein / mTERF family protein
264954_at	At1g77060	2.35251	1.01996		0.489059	1.12537		1.6171	0.336176	1.78422	regulation of transcription.unclassified	0.538084	0.0461454	3.4e-08	Significant Only byCO2 and Interaction	27.3.99	mutase family protein
258229_at	At3g27700	0.574517	0.997067		1.6592	0.747785		0.649902	1.87691	0.487417	RNA binding	0.0462831	0.365671	1.06e-05	Significant Only byAge and Interaction	27.4	RNA recognition motif (RRM)-containing protein
263371_at	At2g20490	1.43206	1.43386		0.680697	1.12952		0.893664	0.424782	0.703982	RNA binding	0.000535316	0.0941231	0.0325006	Significant Only byAge and Interaction	27.4	EDA27/NOP10 (embryo sac development arrest 27); RNA binding
244997_at	AtCg00170	0.19406	0.895235		2.07669	0.739426		0.245221	2.62418	0.202542	transcription	2.37e-05	0.00717946	7.79e-06	Significant Only by Age and CO2 and Interaction	27.2	RNA polymerase beta' subunit-2
244998_at	AtCg00180	0.361669	0.878402		1.75169	0.983154		0.327469	1.58605	0.366521	transcription	1.67e-07	0.000884673	1.41e-07	Significant Only by Age and CO2 and Interaction	27.2	RNA polymerase beta' subunit-1
259908_at	At1g60850	1.4938	1.29511		0.780304	1.13841		0.915651	0.478302	0.804864	transcription	4.06e-05	0.0361153	0.00117096	Significant Only by Age and CO2 and Interaction	27.2	ATRPAC42 (Arabidopsis thaliana RNA polymerase I subunit 42); DNA binding / DNA-directed RNA polymerase
252292_at	At3g49000	1.98632	1.08663		0.440648	0.879062		1.85596	0.411728	1.50143	transcription	0.353157	0.781787	4.88e-07	Significant Only by Interaction	27.2	RNA polymerase III subunit RPC82 family protein
251593_at	At3g57660	0.676576	1.14843		1.11287	0.826159		0.528694	0.869628	0.380334	transcription	0.000195962	0.260047	0.0248228	Significant Only byAge and Interaction	27.2	NRPA1 (nuclear RNA polymerase A 1); DNA binding / DNA-directed RNA polymerase
265991_at	At2g24120	0.894089	1.21463		0.958664	0.815998		0.698783	0.749252	0.469448	transcription	1.66e-07	0.0805518	0.00111116	Significant Only byAge and Interaction	27.2	PDE319/SCA3 (PIGMENT DEFECTIVE 319, SCABRA 3); DNA binding / DNA-directed RNA polymerase
DNA
248555_at	At5g50340	1.58329	1.17966		0.607881	0.789822		2.12888	0.817353	1.42536	repair	5.83e-05	0.290802	1.9e-05	Significant Only byAge and Interaction	28.2	ATP binding / ATP-dependent peptidase/ damaged DNA binding / nucleoside-triphosphatase/ nucleotide binding / serine-type endopeptidase
257701_at	At3g12710	0.716342	1.01784		1.68768	0.945283		0.900446	2.12143	0.836255	repair	0.0217725	0.0885081	0.000115529	Significant Only byAge and Interaction	28.2	methyladenine glycosylase family protein
253975_at	At4g26600	0.824099	1.27669		1.1673	1.09279		0.509938	0.722305	0.436484	synthesis/chromatin structure	1.77e-08	0.00143088	0.000535117	Significant Only by Age and CO2 and Interaction	28.1	nucleolar protein, putative
247608_at	At5g60990	0.742294	1.18835		1.1332	0.891831		0.629861	0.961561	0.472697	synthesis/chromatin structure	2.23e-06	0.036516	0.000232413	Significant Only by Age and CO2 and Interaction	28.1	DEAD/DEAH box helicase, putative (RH10)
245575_at	At4g14760	0.638989	1.19509		1.65381	0.941898		0.804683	2.08265	0.634201	synthesis/chromatin structure	0.789876	0.605831	8.95e-05	Significant Only by Interaction	28.1	M protein repeat-containing protein
250774_at	At5g05450	1.99162	1.20543		0.541113	1.12546		1.68853	0.458767	1.57651	synthesis/chromatin structure	0.18862	0.106196	3.59e-07	Significant Only by Interaction	28.1	DEAD/DEAH box helicase, putative (RH18)
258931_at	At3g10010	0.576804	1.19268		1.45358	0.647894		0.814968	2.05376	0.442711	synthesis/chromatin structure	0.415161	0.922094	0.000530957	Significant Only by Interaction	28.1	HhH-GPD base excision DNA repair family protein
267489_s_at	At2g19120;At4g30100	0.59317	0.946548		1.76691	0.96205		0.719459	2.1431	0.731242	synthesis/chromatin structure	0.357736	0.214993	4.96e-06	Significant Only by Interaction	28.1	[AT2G19120, tRNA-splicing endonuclease positive effector-related];[AT4G30100, tRNA-splicing endonuclease positive effector-related]
248854_at	At5g46580	1.43622	1.1919		0.771255	1.08648		0.852988	0.458057	0.777544	synthesis/chromatin structure	0.000350641	0.362171	0.0174189	Significant Only byAge and Interaction	28.1	pentatricopeptide (PPR) repeat-containing protein
258554_at	At3g06980	1.39136	0.899304		0.656265	0.883364		0.892451	0.420945	0.876632	synthesis/chromatin structure	0.000507437	0.28335	0.0025353	Significant Only byAge and Interaction	28.1	DEAD/DEAH box helicase, putative
266226_at	At2g28740	1.11546	1.15732		0.555164	0.874832		0.966966	0.48126	0.730944	synthesis/chromatin structure.histone	0.000310998	0.0732832	0.0119798	Significant Only byAge and Interaction	28.1.3	HIS4 (Histone H4)
257798_at	At3g15950	1.0087	2.16443		0.980746	1.51143		0.656917	0.638715	0.458729	unspecified	2.39e-08	2.57e-08	1.83e-05	Significant Only by Age and CO2 and Interaction	28.99	(TSA1-LIKE); unknown protein
253273_at	At4g34180	0.75044	0.977184		1.27465	1.20807		1.31694	2.23687	1.6281	unspecified	1.06e-06	0.357607	0.0115581	Significant Only byAge and Interaction	28.99	cyclase family protein
258861_at	At3g02060	0.657508	1.05499		1.34809	0.898497		0.523484	1.0733	0.445831	unspecified	3.04e-05	0.376133	0.000718912	Significant Only byAge and Interaction	28.99	DEAD/DEAH box helicase, putative
Protein
266478_at	At2g31170	1.38875	1.00485		0.698807	1.0333		0.808752	0.406956	0.831656	aa activation.cysteine-tRNA ligase	1.28e-05	0.551873	0.000572753	Significant Only byAge and Interaction	29.1.16	tRNA synthetase class I (C) family protein
247319_at	At5g64050	1.3294	0.793544		0.756956	1.02408		0.770467	0.4387	0.994296	aa activation.glutamate-tRNA ligase	2.53e-06	0.0163082	1.76e-05	Significant Only by Age and CO2 and Interaction	29.1.17	ATERS/ERS/OVA3 (OVULE ABORTION 3); glutamate-tRNA ligase
252404_at	At3g48110	1.4436	0.95907		0.679125	1.01161		0.927799	0.436473	0.978622	aa activation.glycine-tRNA ligase	3.05e-05	0.294195	2.1e-05	Significant Only byAge and Interaction	29.1.14	EDD1 (EMBRYO-DEFECTIVE-DEVELOPMENT 1)
246801_at	At5g26830	1.805	1.09964		0.531996	1.02617		1.52378	0.449111	1.42198	aa activation.threonine-tRNA ligase	0.963149	0.479511	1.49e-08	Significant Only by Interaction	29.1.3	threonyl-tRNA synthetase / threonine--tRNA ligase (THRRS)
253256_at	At4g34360	0.719164	0.837206		1.0182	0.632856		0.642601	0.909801	0.485752	degradation	6.21e-06	0.0028945	0.0041723	Significant Only by Age and CO2 and Interaction	29.5	protease-related
247157_at	At5g65770	0.464885	0.803647		1.66138	1.06943		0.508227	1.81627	0.676306	degradation	0.0882909	0.459237	0.000520008	Significant Only by Interaction	29.5	nuclear matrix constituent protein-related
253005_at	At4g38100	1.31266	1.23093		0.788051	1.16267		0.735544	0.441583	0.694755	degradation	1.46e-06	0.0537619	0.00835789	Significant Only byAge and Interaction	29.5	threonine endopeptidase
244971_at	AtCg00670	0.482922	0.95058		1.73229	1.11103		0.463587	1.66294	0.541835	degradation	0.000457862	0.222544	9.57e-06	Significant Only byAge and Interaction	29.5	Encodes the only ClpP (caseinolytic protease) encoded within the plastid genome. Contains a highly conserved catalytic triad of Ser-type proteases (Ser-His-Asp). Part of the 350 kDa chloroplast Clp complex. The name reflects nomenclature described in Ada
262130_at	At1g02890	0.58673	0.976103		1.76386	1.06618		0.766728	2.30498	0.837486	degradation.AAA type	0.167627	0.67981	0.000658258	Significant Only by Interaction	29.5.9	AAA-type ATPase family protein
247235_at	At5g64580	1.33214	1.04196		0.853366	0.893023		0.760106	0.486923	0.651458	degradation.AAA type	1.6e-06	0.108593	0.00893949	Significant Only byAge and Interaction	29.5.9	AAA-type ATPase family protein
259507_at	At1g43910	0.686099	1.41296		1.43647	1.05956		1.55408	3.25373	1.16538	degradation.AAA type	0.000577702	0.470209	0.0198111	Significant Only byAge and Interaction	29.5.9	AAA-type ATPase family protein
245262_at	At4g16563	0.715253	1.36538		2.00211	1.02534		0.413899	1.15857	0.310819	degradation.aspartate protease	4.8e-08	0.00650166	4.59e-07	Significant Only by Age and CO2 and Interaction	29.5.4	aspartyl protease family protein
255283_at	At4g04620	1.57614	1.12627		0.599207	1.32828		2.24016	0.851651	2.64197	degradation.autophagy	4.25e-06	0.0048074	4.06e-05	Significant Only by Age and CO2 and Interaction	29.5.2	ATG8B (AUTOPHAGY 8B); microtubule binding
251393_at	At3g60640	1.68251	1.32256		0.817337	0.862729		2.31749	1.1258	1.51174	degradation.autophagy	0.000642319	0.75798	0.0474743	Significant Only byAge and Interaction	29.5.2	ATG8G (AUTOPHAGY 8G); microtubule binding
264828_at	At1g03380	0.71798	0.871785		1.26399	1.05864		1.19892	2.11067	1.45589	degradation.autophagy	2.66e-05	0.866382	0.0142258	Significant Only byAge and Interaction	29.5.2	AtATG18g (Arabidopsis thaliana homolog of yeast autophagy 18 (ATG18) g)
252309_at	At3g49340	1.21595	0.992071		2.53549	1.44085		1.87267	3.90487	2.71979	degradation.cysteine protease	1.93e-05	0.00336065	0.0103494	Significant Only by Age and CO2 and Interaction	29.5.3	cysteine proteinase, putative
245483_at	At4g16190	0.645336	0.802214		1.29537	0.858015		1.23051	2.46996	1.3161	degradation.cysteine protease	1.87e-06	0.0253013	0.00025417	Significant Only by Age and CO2 and Interaction	29.5.3	cysteine proteinase, putative
255590_at	At4g01610	0.665142	0.898768		1.38005	1.17041		1.40291	2.91077	1.82691	degradation.cysteine protease	1.49e-05	0.776952	0.0298453	Significant Only byAge and Interaction	29.5.3	cathepsin B-like cysteine protease, putative
255842_at	At2g33530	0.469585	0.900623		1.54719	0.877427		0.897349	2.9566	0.874238	degradation.serine protease	0.00371624	0.407394	3.3e-05	Significant Only byAge and Interaction	29.5.5	SCPL46 (serine carboxypeptidase-like 46); serine carboxypeptidase
253218_at	At4g34980	0.669287	1.0619		1.67117	0.854815		1.01204	2.52701	0.814681	degradation.subtilases	3.8e-05	0.00403672	1.96e-07	Significant Only by Age and CO2 and Interaction	29.5.1	SLP2 (subtilisin-like serine protease 2); subtilase
256997_at	At3g14067	0.578409	0.894494		1.8137	0.92854		1.06255	3.33182	1.103	degradation.subtilases	0.000936613	0.115532	0.000830805	Significant Only byAge and Interaction	29.5.1	subtilase family protein
252392_s_at	At3g47890;At3g47910	0.62561	1.08226		1.31957	0.631942		0.722952	1.52489	0.42214	degradation.ubiquitin	0.00300524	0.344466	2.49e-05	Significant Only byAge and Interaction	29.5.11	[AT3G47890, ubiquitin carboxyl-terminal hydrolase-related];[AT3G47910, binding / nucleic acid binding / ubiquitin thiolesterase/ zinc ion binding]
264335_s_at	At1g55860;At1g70320	0.486142	0.749409		1.61615	0.7614		0.59539	1.97934	0.604916	degradation.ubiquitin.E3.HECT	0.0942828	0.00697565	2.57e-06	Significant Only byCO2 and Interaction	29.5.11.4.1	[AT1G55860, UPL1 (UBIQUITIN-PROTEIN LIGASE 1); ubiquitin-protein ligase];[AT1G70320, UPL2 (UBIQUITIN-PROTEIN LIGASE 2); ubiquitin-protein ligase]
253806_at	At4g28270	0.684051	0.772735		1.15461	0.737841		1.37565	2.32196	1.31353	degradation.ubiquitin.E3.RING	0.000115188	0.0464376	0.0265336	Significant Only by Age and CO2 and Interaction	29.5.11.4.2	zinc finger (C3HC4-type RING finger) family protein
245684_at	At5g22000	0.671922	1.03642		1.67808	1.08696		0.891543	2.22657	0.935021	degradation.ubiquitin.E3.RING	0.00275732	0.186189	3.07e-05	Significant Only byAge and Interaction	29.5.11.4.2	CIC7E11; protein binding / zinc ion binding
259012_at	At3g07360	0.627612	1.00267		1.68381	1.21575		1.02023	2.73715	1.23703	degradation.ubiquitin.E3.RING	0.000611264	0.40842	0.00182082	Significant Only byAge and Interaction	29.5.11.4.2	armadillo/beta-catenin repeat family protein / U-box domain-containing protein
261852_at	At1g50440	1.70933	0.943952		0.670006	1.01582		2.3136	0.906863	2.48974	degradation.ubiquitin.E3.RING	0.000191739	0.990426	0.00291697	Significant Only byAge and Interaction	29.5.11.4.2	zinc finger (C3HC4-type RING finger) family protein
263870_at	At2g22010	0.526073	1.09305		1.60566	1.08073		0.871937	2.6613	0.862104	degradation.ubiquitin.E3.RING	0.03421	0.721837	0.00035496	Significant Only byAge and Interaction	29.5.11.4.2	zinc finger (C3HC4-type RING finger) family protein
264091_at	At1g79110	1.43137	1.00942		0.691602	0.726439		2.0932	1.01139	1.5064	degradation.ubiquitin.E3.RING	0.00028581	0.13751	0.00511543	Significant Only byAge and Interaction	29.5.11.4.2	protein binding / zinc ion binding
257476_at	At1g80960	0.688978	0.895823		1.54055	1.26839		1.20382	2.69175	1.70449	degradation.ubiquitin.E3.SCF.FBOX	0.000202428	0.557315	0.0292647	Significant Only byAge and Interaction	29.5.11.4.3.2	F-box protein-related
245100_at	At2g40930	0.495382	0.942065		1.49515	0.700018		0.655751	1.97918	0.487268	degradation.ubiquitin.ubiquitin protease	0.16084	0.403266	0.000449041	Significant Only by Interaction	29.5.11.5	UBP5 (UBIQUITIN-SPECIFIC PROTEASE 5); ubiquitin-specific protease
247838_at	At5g57990	0.547486	1.05736		1.70955	0.916762		0.424159	1.32445	0.367758	degradation.ubiquitin.ubiquitin protease	3.35e-07	0.134371	7.13e-07	Significant Only byAge and Interaction	29.5.11.5	UBP23 (UBIQUITIN-SPECIFIC PROTEASE 23); ubiquitin-specific protease
249977_at	At5g18820	1.09704	1.42314		1.25426	1.48667		0.47906	0.547719	0.500449	folding	4.45e-05	0.0381513	0.598062	No Interaction significant Age CO2	29.6	EMB3007 (EMBRYO DEFECTIVE 3007); ATP binding / protein binding / unfolded protein binding
260125_at	At1g36390	1.49726	0.91971		0.498856	0.921746		1.24379	0.414404	1.24654	folding	0.132758	0.682264	0.000169929	Significant Only by Interaction	29.6	co-chaperone grpE family protein
251425_at	At3g60210	1.40981	0.984477		0.713976	1.03399		0.946154	0.479164	0.993736	folding	0.00064251	0.577969	0.000361331	Significant Only byAge and Interaction	29.6	chloroplast chaperonin 10, putative
248094_at	At5g55220	1.20069	0.947007		0.776254	1.13564		0.666317	0.430776	0.799037	folding	1.81e-05	0.934335	0.0142478	Significant Only byAge and Interaction	29.6	trigger factor type chaperone family protein
256983_at	At3g13470	1.51428	1.16098		0.675863	1.2162		0.693162	0.309376	0.72613	folding	8.94e-06	0.215682	0.00240394	Significant Only byAge and Interaction	29.6	chaperonin, putative
254662_at	At4g18270	1.12149	0.844268		0.498883	0.711854		1.69394	0.753536	1.42827	glycosylation	0.00087203	0.000524374	7.49e-05	Significant Only by Age and CO2 and Interaction	29.7	ATTRANS11 (Arabidopsis thaliana translocase 11); catalytic
264895_at	At1g23100	1.25142	1.4634		0.79261	1.57648		0.620409	0.392949	0.668351	postranslational modification	0.000793779	0.0365884	0.44534	No Interaction significant Age CO2	29.4	10 kDa chaperonin, putative
251017_at	At5g02760	1.01141	0.761435		2.9153	1.50267		0.318239	0.917298	0.628037	postranslational modification	3.17e-06	3.95e-05	0.000337068	Significant Only by Age and CO2 and Interaction	29.4	protein phosphatase 2C family protein / PP2C family protein
261713_at	At1g32640	1.21406	1.89501		2.00666	1.62916		1.18198	1.95364	1.01616	postranslational modification	0.00475501	0.000547176	0.00906548	Significant Only by Age and CO2 and Interaction	29.4	ATMYC2 (JASMONATE INSENSITIVE 1); DNA binding / transcription factor
267422_at	At2g35050	0.851406	0.995547		1.51172	0.905404		1.12729	2.00158	1.02522	postranslational modification	0.000145704	0.00891936	0.000243342	Significant Only by Age and CO2 and Interaction	29.4	protein kinase family protein
249678_at	At5g35980	0.513995	0.893672		1.72993	0.947203		0.596504	2.00763	0.632235	postranslational modification	0.121986	0.440062	2.01e-06	Significant Only by Interaction	29.4	protein kinase family protein
246756_at	At5g27930	0.742165	0.901801		1.14962	0.995367		1.51149	2.34132	1.66832	postranslational modification	2.17e-09	0.624956	0.0018636	Significant Only byAge and Interaction	29.4	protein phosphatase 2C, putative / PP2C, putative
260562_at	At2g43850	1.54674	1.2542		0.725035	0.839804		2.62447	1.23022	1.75733	postranslational modification	1.72e-05	0.853672	0.0114113	Significant Only byAge and Interaction	29.4	ankyrin protein kinase, putative (APK1)
260118_s_at	At5g18700;At1g33940	0.698574	0.756373		1.35869	1.07296		0.424659	0.825942	0.602403	postranslational modification	6.6e-05	0.314404	0.0192038	Significant Only byAge and Interaction	29.4	[AT5G18700, EMB3013 (EMBRYO DEFECTIVE 3013); kinase];[AT1G33940, similar to EMB3013 (EMBRYO DEFECTIVE 3013), kinase [Arabidopsis thaliana] (TAIR:AT5G18700.1); similar to Os01g0259400 [Oryza sativa (japonica cultivar-group)] (GB:NP_001042639.1); similar to
263076_at	At2g17520	0.626466	1.13396		1.11137	0.827911		1.45916	2.58859	1.06534	postranslational modification	2.15e-05	0.540853	0.00120624	Significant Only byAge and Interaction	29.4	IRE1A (Yeast endoribonuclease/protein kinase IRE1-like gene); kinase
265661_at	At2g24360	0.775127	1.04183		1.41405	1.05729		1.20033	2.18975	1.21814	postranslational modification	4.86e-05	0.343114	0.00233778	Significant Only byAge and Interaction	29.4	serine/threonine/tyrosine kinase, putative
267490_at	At2g19130	0.773101	1.08006		1.33341	0.924873		1.69477	2.92306	1.45126	postranslational modification	8.6e-05	0.552259	0.0487113	Significant Only byAge and Interaction	29.4	S-locus lectin protein kinase family protein
253147_at	At4g35600	0.748271	0.978042		1.17515	0.954073		1.31809	2.07004	1.28579	postranslational modification.kinase.receptor like cytoplasmatic kinase VII	0.000119993	0.916455	0.0458712	Significant Only byAge and Interaction	29.4.1.57	CONNEXIN 32; kinase
244993_s_at	AtCg01000;AtCg01130	0.491483	1.00299		1.30009	0.837933		0.442371	1.17018	0.369572	protein assembly and cofactor ligation	1.27e-07	0.00143193	2.38e-06	Significant Only by Age and CO2 and Interaction	29.8	[ATCG01000, hypothetical protein];[ATCG01130, hypothetical protein]
245008_at	AtCg00360	0.39312	0.693945		1.35492	1.14035		0.268712	0.926135	0.441571	protein assembly and cofactor ligation	0.000104878	0.0296904	0.00408266	Significant Only by Age and CO2 and Interaction	29.8	Encodes a protein required for photosystem I assembly and stability. In Chlamydomonas reinhardtii, this protein seems to act as a PSI specific chaperone facilitating the assembly of the complex by interacting with PsaA and PsaD. A loss of function mutatio
245018_at	AtCg00520	0.228531	0.828919		3.23725	0.974321		0.229313	3.24833	0.269537	protein assembly and cofactor ligation	1.47e-06	0.0212658	3.11e-09	Significant Only by Age and CO2 and Interaction	29.8	Encodes a protein required for photosystem I assembly and stability. In cyanobacteria, loss of function mutation in this gene increases PSII/PSI ratio without any influence on photoautotrophic growth.
258674_at	At3g08740	1.18309	0.942967		0.671792	0.978292		0.817006	0.463918	0.847612	synthesis.elongation	0.000160168	0.818121	0.00949772	Significant Only byAge and Interaction	29.2.4	elongation factor P (EF-P) family protein
248146_at	At5g54940	1.52405	1.08098		0.719146	0.929443		2.16071	1.01956	1.85781	synthesis.initiation	3.73e-06	0.91778	0.000501464	Significant Only byAge and Interaction	29.2.3	eukaryotic translation initiation factor SUI1, putative
251193_at	At3g62910	1.41796	0.984442		0.715358	1.00408		0.935921	0.472171	0.954593	synthesis.release	0.000224137	0.427248	0.000263641	Significant Only byAge and Interaction	29.2.5	APG3 (ALBINO AND PALE GREEN); translation release factor
258922_at	At3g10610	1.17363	1.10452		0.653503	0.953891		0.812285	0.452297	0.701509	synthesis.ribosomal eukaryotic.40S subunit.S17	7.15e-05	0.56147	0.0409551	Significant Only byAge and Interaction	29.2.1.2.1.17	40S ribosomal protein S17 (RPS17C)
253202_at	At4g34555	1.17825	0.962533		0.597736	0.867875		0.897711	0.455417	0.809427	synthesis.ribosomal eukaryotic.40S subunit.S25	0.000882906	0.536941	0.0183556	Significant Only byAge and Interaction	29.2.1.2.1.25	40S ribosomal protein S25, putative
263016_at	At1g23410	1.58262	1.26442		0.679008	0.93977		0.685322	0.294032	0.509361	synthesis.ribosomal eukaryotic.40S subunit.S27	3.3e-06	0.248967	0.00713785	Significant Only byAge and Interaction	29.2.1.2.1.27	ubiquitin extension protein, putative / 40S ribosomal protein S27A (RPS27aA)
263372_at	At2g20450	1.26813	1.08892		0.716826	1.0675		0.70147	0.396515	0.687674	synthesis.ribosomal eukaryotic.60S subunit.L14	3.49e-06	0.642658	0.0116878	Significant Only byAge and Interaction	29.2.1.2.2.14	60S ribosomal protein L14 (RPL14A)
245355_at	At4g17390	1.21891	1.03483		0.706794	1.08349		0.819987	0.475477	0.858543	synthesis.ribosomal eukaryotic.60S subunit.L15	9.89e-07	0.339303	0.000144871	Significant Only byAge and Interaction	29.2.1.2.2.15	60S ribosomal protein L15 (RPL15B)
251783_at	At3g55280	1.15267	1.1159		0.71184	0.996096		0.75859	0.468471	0.677146	synthesis.ribosomal eukaryotic.60S subunit.L23A	8.34e-06	0.428575	0.0467108	Significant Only byAge and Interaction	29.2.1.2.2.523	60S ribosomal protein L23A (RPL23aB)
265210_at	At2g36620	1.22618	1.03491		0.739796	0.992134		0.807701	0.487313	0.774317	synthesis.ribosomal eukaryotic.60S subunit.L24	2.79e-06	0.963328	0.0022168	Significant Only byAge and Interaction	29.2.1.2.2.24	RPL24A (RIBOSOMAL PROTEIN L24); structural constituent of ribosome
251007_at	At5g02610	1.23274	1.18923		0.669056	0.953015		0.861453	0.467543	0.690346	synthesis.ribosomal eukaryotic.60S subunit.L35	7.44e-06	0.295899	0.00534199	Significant Only byAge and Interaction	29.2.1.2.2.35	60S ribosomal protein L35 (RPL35D)
262594_at	At1g15250	1.22794	1.36824		0.601783	0.919907		0.96706	0.473934	0.650182	synthesis.ribosomal eukaryotic.60S subunit.L37	0.00012454	0.0607296	0.00993729	Significant Only byAge and Interaction	29.2.1.2.2.37	60S ribosomal protein L37 (RPL37A)
263289_at	At2g36170	1.18048	1.04492		0.751877	1.08082		0.773955	0.49295	0.800544	synthesis.ribosomal eukaryotic.60S subunit.L40	5.94e-05	0.653804	0.0268896	Significant Only byAge and Interaction	29.2.1.2.2.40	ubiquitin extension protein 2 (UBQ2) / 60S ribosomal protein L40 (RPL40A)
261911_at	At1g80750	1.24752	1.02877		0.684095	0.986573		0.893971	0.49022	0.857307	synthesis.ribosomal eukaryotic.60S subunit.L7	0.000723805	0.948178	0.0111487	Significant Only byAge and Interaction	29.2.1.2.2.7	60S ribosomal protein L7 (RPL7A)
267213_at	At2g44120	1.34801	1.05608		0.652349	1.01251		0.961038	0.465082	0.921393	synthesis.ribosomal eukaryotic.60S subunit.L7	8.13e-05	0.832981	0.000123659	Significant Only byAge and Interaction	29.2.1.2.2.7	60S ribosomal protein L7 (RPL7C)
254980_at	At4g10450	1.22158	1.11986		0.601047	1.12928		0.793372	0.390358	0.800045	synthesis.ribosomal eukaryotic.60S subunit.L9	4.63e-05	0.152297	0.00678305	Significant Only byAge and Interaction	29.2.1.2.2.9	60S ribosomal protein L9 (RPL90D)
254030_at	At4g25890	1.31453	1.24306		0.679765	1.03431		0.902548	0.466721	0.750983	synthesis.ribosomal eukaryotic.60S subunit.P3	0.000208082	0.254494	0.0135502	Significant Only byAge and Interaction	29.2.1.2.2.83	60S acidic ribosomal protein P3 (RPP3A)
244979_at	AtCg00750	0.309973	0.860139		2.16909	0.80892		0.316642	2.21575	0.297787	synthesis.ribosomal prokaryotic.chloroplast.30S subunit.S11	2.8e-07	0.00289794	6.74e-09	Significant Only by Age and CO2 and Interaction	29.2.1.1.1.1.11	30S chloroplast ribosomal protein S11
244940_at	AtCg01230;AtCg00905	0.207641	0.665424		2.57684	0.975546		0.252871	3.13814	0.370722	synthesis.ribosomal prokaryotic.chloroplast.30S subunit.S12	0.00632796	0.0962453	6.74e-05	Significant Only byAge and Interaction	29.2.1.1.1.1.12	[ATCG01230, chloroplast gene encoding ribosomal protein s12. The gene is located in three distinct loci on the chloroplast genome and is transpliced to make one transcript.];[ATCG00905, chloroplast gene encoding ribosomal protein s12. The gene is located
245049_at	AtCg00050	0.486141	1.35385		1.25486	1.42915		0.320104	0.826274	0.337909	synthesis.ribosomal prokaryotic.chloroplast.30S subunit.S16	6.61e-07	0.000128262	0.000302844	Significant Only by Age and CO2 and Interaction	29.2.1.1.1.1.16	Homologous to the bacterial ribosomal protein S16
244986_at	AtCg00820	0.522674	1.04598		1.00381	0.902942		0.547617	1.05171	0.472731	synthesis.ribosomal prokaryotic.chloroplast.30S subunit.S19	9.05e-05	0.0069618	0.00280353	Significant Only by Age and CO2 and Interaction	29.2.1.1.1.1.19	Encodes a 6.8-kDa protein of the small ribosomal subunit.
244996_at	AtCg00160	0.330193	0.819587		2.12013	0.954167		0.259594	1.66682	0.30222	synthesis.ribosomal prokaryotic.chloroplast.30S subunit.S2	2.47e-07	0.0031445	2.26e-07	Significant Only by Age and CO2 and Interaction	29.2.1.1.1.1.2	Chloroplast ribosomal protein S2
245009_at	AtCg00380	0.507693	0.891289		1.42537	1.0403		0.460436	1.29269	0.537413	synthesis.ribosomal prokaryotic.chloroplast.30S subunit.S4	8.15e-05	0.058004	0.000116472	Significant Only byAge and Interaction	29.2.1.1.1.1.4	Chloroplast encoded ribosomal protein S4
244992_s_at	AtCg00900;AtCg01240	0.298361	0.859379		2.20614	1.37145		0.364225	2.69315	0.581252	synthesis.ribosomal prokaryotic.chloroplast.30S subunit.S7	0.0770936	0.38053	0.000357401	Significant Only by Interaction	29.2.1.1.1.1.7	[ATCG00900, encodes a chloroplast ribosomal protein S7, a constituent of the small subunit of the ribosomal complex];[ATCG01240, 30S chloroplast ribosomal protein S7]
244981_at	AtCg00770	0.200713	0.943721		2.30931	0.983006		0.233796	2.68995	0.243529	synthesis.ribosomal prokaryotic.chloroplast.30S subunit.S8	2.07e-09	3.86e-06	3.06e-10	Significant Only by Age and CO2 and Interaction	29.2.1.1.1.1.8	chloroplast 30S ribosomal protein S8
244982_at	AtCg00780	0.213893	0.815434		2.08929	1.10017		0.216533	2.11508	0.292143	synthesis.ribosomal prokaryotic.chloroplast.50S subunit.L14	4.41e-08	3.09e-05	2.96e-08	Significant Only by Age and CO2 and Interaction	29.2.1.1.1.2.14	encodes a chloroplast ribosomal protein L14, a constituent of the large subunit of the ribosomal complex
244983_at	AtCg00790	0.23487	0.912651		1.96062	1.65561		0.246896	2.06101	0.447886	synthesis.ribosomal prokaryotic.chloroplast.50S subunit.L16	0.00029242	0.00600454	0.000138448	Significant Only by Age and CO2 and Interaction	29.2.1.1.1.2.16	chloroplast gene encoding a ribosomal protein L16, which is a constituent of 50S large ribosomal subunit
245357_at	At4g17560	1.59432	0.930193		0.483146	0.885569		1.20348	0.364705	1.14575	synthesis.ribosomal prokaryotic.chloroplast.50S subunit.L19	0.000157573	0.127722	5.84e-08	Significant Only byAge and Interaction	29.2.1.1.1.2.19	ribosomal protein L19 family protein
244985_at	AtCg00810	0.349674	0.910915		1.92055	0.983459		0.277009	1.52144	0.29907	synthesis.ribosomal prokaryotic.chloroplast.50S subunit.L22	7.03e-09	0.000206872	1.97e-08	Significant Only by Age and CO2 and Interaction	29.2.1.1.1.2.22	encodes a chloroplast ribosomal protein L22, a constituent of the large subunit of the ribosomal complex
244980_at	AtCg00760	0.231167	0.888816		3.06908	0.957339		0.222961	2.96014	0.24015	synthesis.ribosomal prokaryotic.chloroplast.50S subunit.L36	6.86e-07	0.0128982	9.62e-09	Significant Only by Age and CO2 and Interaction	29.2.1.1.1.2.36	encodes a chloroplast ribosomal protein L36, a constituent of the large subunit of the ribosomal complex
246339_at	At3g44890	1.23889	0.870102		0.677817	0.948631		0.857709	0.469265	0.935119	synthesis.ribosomal prokaryotic.chloroplast.50S subunit.L9	1.38e-05	0.225006	0.000111497	Significant Only byAge and Interaction	29.2.1.1.1.2.9	RPL9 (ribosomal protein L9); structural constituent of ribosome
244944_s_at	AtMg00080;AtMg00090	0.322111	1.22989		1.84863	1.57694		0.397111	2.27906	0.50917	synthesis.ribosomal prokaryotic.mitochondrion.30S subunit.S3	0.0107266	0.00980997	0.000566299	Significant Only by Age and CO2 and Interaction	29.2.1.1.2.1.3	[ATMG00080, encodes a mitochondrial ribosomal protein L16, which is a constituent of the large ribosomal subunit];[ATMG00090, ribosomal protein S3]
261507_at	At1g71720	1.57049	0.992704		0.561309	0.851507		1.14666	0.409829	0.983568	synthesis.ribosomal prokaryotic.unknown organellar.30S subunit.S1	0.000437281	0.216724	8.04e-06	Significant Only byAge and Interaction	29.2.1.1.3.1.1	S1 RNA-binding domain-containing protein
257891_at	At3g17170	1.41178	1.13976		0.619472	1.16411		0.846974	0.371641	0.865072	synthesis.ribosomal prokaryotic.unknown organellar.30S subunit.S6	0.000662794	0.438512	0.00667233	Significant Only byAge and Interaction	29.2.1.1.3.1.6	RFC3 (REGULATOR OF FATTY-ACID COMPOSITION 3); structural constituent of ribosome
248295_at	At5g53070	1.93944	0.957701		0.386568	0.995052		1.40319	0.279682	1.45791	synthesis.ribosomal prokaryotic.unknown organellar.50S subunit.L9	0.043693	0.81683	9.55e-07	Significant Only byAge and Interaction	29.2.1.1.3.2.9	ribosomal protein L9 family protein
260815_at	At1g06950	1.29389	1.18255		0.789024	1.08665		0.695146	0.423906	0.638769	targeting.chloroplast	5.66e-06	0.330946	0.0414702	Significant Only byAge and Interaction	29.3.3	ATTIC110/TIC110 (TRANSLOCON AT THE INNER ENVELOPE MEMBRANE OF CHLOROPLASTS 110)
247632_at	At5g60460	1.52953	1.19949		0.796823	1.21614		2.14529	1.11761	2.17507	targeting.secretory pathway.unspecified	5.84e-06	0.0858609	0.00292522	Significant Only byAge and Interaction	29.3.4.99	sec61beta family protein
252576_s_at	At3g45450;At3g48870	0.521689	1.20491		1.86732	1.03422		0.352475	1.26164	0.302544	targeting.unknownor degredation	5.67e-07	0.0177618	4.69e-06	Significant Only by Age and CO2 and Interaction	29.3.99	[AT3G45450, Clp amino terminal domain-containing protein];[AT3G48870, ATCLPC (CASEINOLYTIC PROTEASE C); ATP binding / ATPase]
Signalling
255795_at	At2g33380	1.04423	1.49576		1.44531	1.78378		1.98507	2.74752	2.3673	calcium	9.09e-07	0.00174749	0.0699779	No Interaction significant Age CO2	30.3	RD20 (RESPONSIVE TO DESSICATION 20); calcium ion binding
259609_at	At1g52410	1.0748	1.77181		3.11489	2.23887		0.909076	2.6346	1.14871	calcium	0.00010731	1.41e-05	5.53e-05	Significant Only by Age and CO2 and Interaction	30.3	TSA1 (TSK-ASSOCIATING PROTEIN 1); calcium ion binding / protein binding
259137_at	At3g10300	1.63405	1.34091		0.575849	0.954569		2.71651	0.957312	1.93384	calcium	0.000341371	0.322644	0.00775272	Significant Only byAge and Interaction	30.3	calcium-binding EF hand family protein
266371_at	At2g41410	0.74935	1.44332		1.24742	1.06721		1.46974	2.44663	1.08674	calcium	0.000703505	0.210817	0.0245958	Significant Only byAge and Interaction	30.3	calmodulin, putative
253163_at	At4g35750	0.523659	0.953068		1.73523	1.20377		0.857636	2.84192	1.08324	G-proteins	0.00432209	0.739883	0.00046245	Significant Only byAge and Interaction	30.5	Rho-GTPase-activating protein-related
258545_at	At3g07050	1.50534	1.47437		0.76827	1.19016		0.861757	0.43981	0.695638	G-proteins	0.000425455	0.0651403	0.0405104	Significant Only byAge and Interaction	30.5	GTP-binding family protein
261301_at	At1g48570	1.37934	1.11013		0.68016	1.11872		0.752141	0.370885	0.757958	G-proteins	3.11e-06	0.368354	0.00102819	Significant Only byAge and Interaction	30.5	zinc finger (Ran-binding) family protein
247280_at	At5g64260	0.955539	1.25521		1.50036	1.15396		1.41136	2.21609	1.29752	in sugar and nutrient physiology	9.35e-05	0.0862797	0.0242446	Significant Only byAge and Interaction	30.1.1	phosphate-responsive protein, putative
249425_at	At5g39790	1.50161	1.02951		0.661606	1.0641		1.10552	0.487089	1.14265	in sugar and nutrient physiology	0.00436577	0.554789	7.58e-06	Significant Only byAge and Interaction	30.1.1	5'-AMP-activated protein kinase beta-1 subunit-related
267364_at	At2g40080	0.821869	0.576807		0.611038	0.487749		2.17411	1.61639	1.83843	light	0.000180339	0.00184974	0.100807	No Interaction significant Age CO2	30.11	ELF4 (EARLY FLOWERING 4)
258321_at	At3g22840	0.738846	0.703519		1.98004	1.81593		1.19878	3.21262	3.09432	light	4.97e-05	0.138815	0.0127414	Significant Only byAge and Interaction	30.11	ELIP1 (EARLY LIGHT-INDUCABLE PROTEIN); chlorophyll binding
263779_at	At2g46340	0.353877	1.01174		1.85693	0.852618		0.564076	2.95993	0.475359	light	0.046423	0.303535	5.28e-08	Significant Only byAge and Interaction	30.11	SPA1 (SUPPRESSOR OF PHYA-105 1); signal transducer
263333_at	At2g03890	0.615998	0.896785		1.43596	1.12939		0.867612	2.0225	1.09265	phosphinositides	0.00549149	0.99436	0.000449443	Significant Only byAge and Interaction	30.4	phosphatidylinositol 3- and 4-kinase family protein
262540_at	At1g34260	0.60593	1.01061		1.64964	0.937978		0.793193	2.15946	0.736184	phosphinositides.phosphatidylinositol-4-phosphate 5-kinase	0.166038	0.44608	7.75e-06	Significant Only by Interaction	30.4.1	phosphatidylinositol-4-phosphate 5-kinase family protein
263218_at	At1g30570	0.871497	0.874022		1.99721	1.37856		0.452159	1.03621	0.713172	receptor kinases.Catharanthus roseus-like RLK1	0.000991788	0.0936694	0.0062003	Significant Only byAge and Interaction	30.2.16	protein kinase family protein
252549_at	At3g45860	0.596271	0.900932		0.832038	0.495096		4.01702	5.60537	2.2075	receptor kinases.DUF 26	2.28e-06	0.0249261	0.0275443	Significant Only by Age and CO2 and Interaction	30.2.17	receptor-like protein kinase, putative
254256_at	At4g23180	0.666636	0.830985		1.14527	0.813021		1.30491	2.24182	1.2767	receptor kinases.DUF 26	2.49e-05	0.0818757	0.00772287	Significant Only byAge and Interaction	30.2.17	CRK10 (CYSTEINE-RICH RLK10); kinase
254247_at	At4g23260	0.77753	0.932638		0.735016	0.568028		2.36703	2.23761	1.44165	receptor kinases.DUF 26. stress too	5.88e-05	0.0299061	0.0701459	No Interaction significant Age CO2	30.2.17	protein kinase family protein
267550_at	At2g32800	0.737311	0.830727		1.36102	1.09175		1.16763	2.15535	1.53451	receptor kinases.legume-lectin	0.000357093	0.6544	0.0464308	Significant Only byAge and Interaction	30.2.19	AP4.3A; ATP binding / protein kinase
247684_at	At5g59670	0.546257	0.547493		0.753879	0.307768		3.42532	4.72721	1.92551	receptor kinases.leucine rich repeat I	3.7e-05	0.00303101	0.0258873	Significant Only by Age and CO2 and Interaction	30.2.1	leucine-rich repeat protein kinase, putative
245644_at	At1g25320	0.618882	0.95199		1.53913	0.787371		0.817951	2.0342	0.67651	receptor kinases.leucine rich repeat III	0.286159	0.0574225	2.98e-06	Significant Only by Interaction	30.2.3	leucine-rich repeat transmembrane protein kinase, putative
255428_at	At4g03390	0.423968	1.00644		2.21399	0.996152		0.421853	2.20295	0.417538	receptor kinases.leucine rich repeat V	2.68e-08	0.232779	5.49e-12	Significant Only byAge and Interaction	30.2.5	leucine-rich repeat transmembrane protein kinase, putative
251714_at	At3g56370	0.631847	1.05857		1.30136	0.911102		0.545992	1.12453	0.469929	receptor kinases.leucine rich repeat VII	8.53e-06	0.10713	9.97e-05	Significant Only byAge and Interaction	30.2.7	leucine-rich repeat transmembrane protein kinase, putative
264663_at	At1g09970	0.433848	0.893689		2.25693	1.35716		0.686247	3.56993	1.04214	receptor kinases.leucine rich repeat XI	0.0298104	0.580458	0.00065757	Significant Only byAge and Interaction	30.2.11	leucine-rich repeat transmembrane protein kinase, putative
265844_at	At2g35620	1.64382	0.865171		0.561995	1.01512		1.76697	0.604099	2.07321	receptor kinases.leucine rich repeat XIII	5.76e-05	0.625452	1.54e-07	Significant Only byAge and Interaction	30.2.13	leucine-rich repeat transmembrane protein kinase, putative
260345_at	At1g69270	0.830625	1.22245		1.26444	0.979852		1.51244	2.30235	1.2123	receptor kinases.misc	0.000114067	0.666812	0.0281968	Significant Only byAge and Interaction	30.2.99	RPK1 (RECEPTOR-LIKE PROTEIN KINASE 1); kinase
254416_at	At4g21380	0.639675	0.729982		0.784198	0.473148		2.14118	2.62494	1.38784	receptor kinases.S-locus glycoprotein like	0.000527839	0.0217559	0.134336	No Interaction significant Age CO2	30.2.24	ARK3 (Arabidopsis Receptor Kinase 3); kinase
260419_at	At1g69730	0.743345	1.17612		1.4454	0.65247		1.42901	2.77864	0.792767	receptor kinases.wall associated kinase	0.00118898	0.094536	0.000627319	Significant Only byAge and Interaction	30.2.25	protein kinase family protein
Cell
260506_at	At1g47210	0.661447	1.03496		1.04672	0.68033		0.586175	0.927606	0.385322	cycle	0.000345675	0.269224	0.02187	Significant Only byAge and Interaction	31.3	CYCA3;2; cyclin-dependent protein kinase
258386_at	At3g15520	1.1514	0.819729		0.722921	0.997894		0.790206	0.496139	0.961954	cycle.peptidylprolyl isomerase	0.000200505	0.382622	0.00316578	Significant Only byAge and Interaction	31.3.1	peptidyl-prolyl cis-trans isomerase TLP38, chloroplast / thylakoid lumen PPIase of 38 kDa / cyclophilin / rotamase
257813_at	At3g25100	0.657459	0.999532		0.760819	0.762868		0.609395	0.705198	0.465105	division	1.79e-05	0.00943891	0.0729393	No Interaction significant Age CO2	31.2	CDC45 (CELL DIVISION CYCLE 45)
259978_at	At1g76540	0.979602	0.924332		0.549768	0.976886		0.87829	0.49291	0.928226	division	0.000831316	0.016161	0.010308	Significant Only by Age and CO2 and Interaction	31.2	CDKB2;1 (CYCLIN-DEPENDENT KINASE B2;1); kinase
266616_at	At2g29680	1.06328	0.742706		0.645302	0.908108		0.736074	0.446721	0.9	division	1.85e-05	0.037806	0.00194714	Significant Only by Age and CO2 and Interaction	31.2	CDC6 (CDC6)
248105_at	At5g55280	1.61953	1.05832		0.638254	0.963131		1.1669	0.459874	1.06195	division	0.011664	0.482634	0.000115536	Significant Only byAge and Interaction	31.2	FTSZ1-1 (FtsZ1-1); structural molecule
251172_at	At3g63190	1.21096	0.829456		0.75326	1.08731		0.762507	0.474305	0.99955	division	2.01e-05	0.463871	0.000213254	Significant Only byAge and Interaction	31.2	ribosome recycling factor, chloroplast, putative / ribosome releasing factor, chloroplast, putative
245265_at	At4g14400	0.672412	0.549399		0.726972	0.443415		2.10854	2.27963	1.70178	organisation	0.000147348	0.00218996	0.156847	No Interaction significant Age CO2	31.1	ACD6 (ACCELERATED CELL DEATH 6); protein binding
246081_s_at	At5g20470;At5g20490	0.531714	1.03342		1.81116	1.07309		0.632056	2.15295	0.656317	organisation	0.543824	0.85906	1.94e-05	Significant Only by Interaction	31.1	[AT5G20470, myosin, putative];[AT5G20490, XIK (Myosin-like protein XIK); motor/ protein binding]
247603_at	At5g60930	0.588742	0.799426		1.08916	1.04908		0.439814	0.813646	0.577166	organisation	9.44e-05	0.0694602	0.0274959	Significant Only byAge and Interaction	31.1	chromosome-associated kinesin, putative
261285_at	At1g35720	0.853389	1.12429		1.27726	1.06824		1.35987	2.0353	1.29207	organisation	4.26e-07	0.182307	0.00166107	Significant Only byAge and Interaction	31.1	ANNAT1 (ANNEXIN ARABIDOPSIS 1); calcium ion binding / calcium-dependent phospholipid binding
265510_at	At2g05630	1.30599	0.877088		0.606847	1.05145		2.25987	1.05008	2.70912	organisation	8.37e-07	0.0599992	0.000194088	Significant Only byAge and Interaction	31.1	ATG8D (autophagy gene 8-related); microtubule binding
254329_at	At4g22540	0.729641	0.886875		1.44977	0.907496		1.02189	2.03046	1.04565	vesicle transport	9.2e-05	0.0165042	4.44e-05	Significant Only by Age and CO2 and Interaction	31.4	oxysterol-binding family protein
Development
247109_at	At5g65870	0.983476	1.23489		1.22768	1.33989		1.98703	2.48043	2.156	unspecified	7.54e-08	0.0199859	0.200895	No Interaction significant Age CO2	33.99	ATPSK5 (PHYTOSULFOKINE 5 PRECURSOR); growth factor
248676_at	At5g48850	2.49911	3.01482		2.1396	3.38856		1.71547	1.46869	1.92814	unspecified	0.00142022	0.000101197	0.101756	No Interaction significant Age CO2	33.99	male sterility MS5 family protein
255127_at	At4g08300	0.58727	0.556695		0.999812	0.620183		1.42485	2.42577	1.58735	unspecified	0.000241204	0.00706054	0.141592	No Interaction significant Age CO2	33.99	nodulin MtN21 family protein
259871_at	At1g76800	0.740325	0.532508		0.744242	0.576874		1.93228	1.9425	2.09327	unspecified	0.000463697	0.0173434	0.652751	No Interaction significant Age CO2	33.99	nodulin, putative
253872_at	At4g27410	0.831859	1.00514		1.55512	2.49697		0.986377	1.84399	2.45036	unspecified	0.000283129	0.00294184	0.00409164	Significant Only by Age and CO2 and Interaction	33.99	RD26 (RESPONSIVE TO DESSICATION 26); transcription factor
256548_at	At3g14770	1.29122	1.32943		0.828254	1.42651		0.635273	0.407497	0.68166	unspecified	8.19e-07	0.00267658	0.0265612	Significant Only by Age and CO2 and Interaction	33.99	nodulin MtN3 family protein
260448_at	At1g72410	0.685213	1.11931		2.11682	1.28145		0.547605	1.69171	0.626927	unspecified	0.111058	0.253615	0.00045862	Significant Only by Interaction	33.99	COP1-interacting protein-related
262514_at	At1g34190	0.621144	1.06645		1.6982	0.942176		0.8544	2.33592	0.754834	unspecified	0.101866	0.483739	0.000194589	Significant Only by Interaction	33.99	ANAC017 (Arabidopsis NAC domain containing protein 17); transcription factor
263220_at	At1g30610	1.57657	1.00899		0.627201	0.991863		1.25031	0.497405	1.22909	unspecified	0.0977073	0.671666	8.98e-06	Significant Only by Interaction	33.99	EMB2279 (EMBRYO DEFECTIVE 2279); binding
245401_at	At4g17670	0.58091	1.20222		1.53324	0.895664		1.6903	4.46133	1.25929	unspecified	0.000752512	0.625447	0.0226809	Significant Only byAge and Interaction	33.99	senescence-associated protein-related
249739_at	At5g24520	0.684178	0.873091		1.49051	1.04344		1.02084	2.22395	1.22002	unspecified	1.06e-05	0.110648	4.12e-05	Significant Only byAge and Interaction	33.99	TTG1 (TRANSPARENT TESTA GLABRA 1); nucleotide binding
250192_at	At5g14520	0.903854	1.24423		1.23513	1.00082		0.585513	0.800113	0.470969	unspecified	4.82e-07	0.0822121	0.00248237	Significant Only byAge and Interaction	33.99	pescadillo-related
255791_at	At2g33430	1.31803	1.08499		0.75278	1.11536		0.79988	0.456843	0.822272	unspecified	2.98e-05	0.454869	0.00371663	Significant Only byAge and Interaction	33.99	plastid developmental protein DAG, putative
259013_at	At3g07430	1.17998	1.02495		0.804074	1.1136		0.641718	0.437285	0.697221	unspecified	8.02e-07	0.712082	0.0218235	Significant Only byAge and Interaction	33.99	EMB1990 (EMBRYO DEFECTIVE 1990)
262170_at	At1g74940	0.54718	0.957403		1.99371	1.10973		0.794066	2.89327	0.920405	unspecified	0.0169979	0.295888	0.000197575	Significant Only byAge and Interaction	33.99	senescence-associated protein-related
263212_at	At1g10510	1.25887	1.05174		0.690319	1.08246		0.836855	0.458901	0.861301	unspecified	0.000406882	0.712467	0.0115216	Significant Only byAge and Interaction	33.99	EMB2004 (EMBRYO DEFECTIVE 2004); protein binding
264444_at	At1g27360	1.61574	0.925284		0.617925	0.778145		2.12141	0.811313	1.78407	unspecified	0.000105464	0.0828216	9.86e-05	Significant Only byAge and Interaction	33.99	squamosa promoter-binding protein-like 11 (SPL11)
264211_at	At1g22770	0.577259	0.943086		1.58966	0.819168		0.780621	2.14969	0.67805	unspecified	0.196809	0.0340514	1.05e-07	Significant Only byCO2 and Interaction	33.99	GI (GIGANTEA)
Transport
251785_at	At3g55130	0.728354	1.23677		1.29171	0.961317		1.41448	2.50853	1.09945	ABC transporters and multidrug resistance systems	0.000388228	0.78894	0.0113654	Significant Only byAge and Interaction	34.16	ATWBC19 (WHITE-BROWN COMPLEX HOMOLOG 19); ATPase, coupled to transmembrane movement of substances
248619_at	At5g49630	0.616679	0.791867		0.988968	0.824408		1.26882	2.03481	1.32096	amino acids	6.84e-05	0.0346743	0.0555188	No Interaction significant Age CO2	34.3	AAP6 (AMINO ACID PERMEASE 6); amino acid permease
250054_at	At5g17860	1.00099	1.38973		1.53058	1.87404		1.72219	2.63334	2.32236	calcium	3.52e-05	0.0139679	0.128343	No Interaction significant Age CO2	34.21	cation exchanger, putative (CAX7)
246303_at	At3g51870	1.33675	1.35019		0.488189	0.720744		0.845442	0.30876	0.451305	calcium	2.13e-05	0.646292	0.0115747	Significant Only byAge and Interaction	34.21	mitochondrial substrate carrier family protein
264400_at	At1g61800	1.2119	2.37044		2.38122	2.31172		1.73528	3.40958	1.69229	metabolite transporters at the envelope membrane	1.03e-06	1.83e-05	0.00225437	Significant Only by Age and CO2 and Interaction	34.8	GPT2 (glucose-6-phosphate/phosphate translocator 2); antiporter/ glucose-6-phosphate transporter
251078_at	At5g01990	1.20737	0.818389		0.671363	0.970287		1.90936	1.06171	2.26375	misc	0.000282215	0.457381	0.0246135	Significant Only byAge and Interaction	34.99	auxin efflux carrier family protein
264835_at	At1g03550	1.76866	0.842338		0.881847	0.949072		2.16994	1.08192	2.4449	misc	0.000156063	0.158244	0.0257884	Significant Only byAge and Interaction	34.99	secretory carrier membrane protein (SCAMP) family protein
264348_at	At1g12110	0.901843	1.19052		1.73499	0.902158		1.18154	2.27308	0.89535	nitrate	0.00165449	0.015107	0.00056917	Significant Only by Age and CO2 and Interaction	34.4	NRT1.1 (nitrate transporter 1.1); transporter
248037_at	At5g55930	0.866337	0.929218		1.65129	0.767884		1.54173	2.93863	1.27405	peptides and oligopeptides	0.000269917	0.0197799	0.00891492	Significant Only by Age and CO2 and Interaction	34.13	ATOPT1 (oligopeptide transporter 1); oligopeptide transporter
260410_at	At1g69870	0.740364	1.08775		1.25817	1.03086		1.30553	2.2186	1.23725	peptides and oligopeptides	3.17e-06	0.689054	0.00141481	Significant Only byAge and Interaction	34.13	proton-dependent oligopeptide transport (POT) family protein
257939_at	At3g19930	0.803232	1.01159		1.65243	1.07573		1.0017	2.06071	1.06521	sugars	0.000435658	0.0294345	0.000226732	Significant Only by Age and CO2 and Interaction	34.2	STP4 (SUGAR TRANSPORTER 4); carbohydrate transporter/ sugar porter
257805_at	At3g18830	0.740025	1.2497		1.61238	1.18893		1.1893	2.59126	1.13146	sugars	0.000887907	0.203583	0.00564372	Significant Only byAge and Interaction	34.2	ATPLT5 (POLYOL TRANSPORTER 5); D-ribose transporter/ D-xylose transporter/ carbohydrate transporter/ galactose transporter/ glucose transporter/ glycerol transporter/ hydrogen:sugar symporter/ mannitol transporter/ monosaccharide transporter/ myo-inositol
262797_at	At1g20840	1.82363	0.943672		0.663118	1.0522		1.92664	0.700576	2.14822	sugars	0.00089176	0.804571	0.000102714	Significant Only byAge and Interaction	34.2	TMT1 (TONOPLAST MONOSACCHARIDE TRANSPORTER1); carbohydrate transporter/ nucleoside transporter/ sugar porter
264992_at	At1g67300	1.54009	0.914986		0.593485	0.957509		2.08251	0.802506	2.17929	sugars	0.000136609	0.553849	0.000331389	Significant Only byAge and Interaction	34.2	hexose transporter, putative
246310_at	At3g51895	0.610526	0.74919		1.291	0.790072		1.4191	3.00077	1.49653	sulphate	1.01e-06	0.012862	0.000749801	Significant Only by Age and CO2 and Interaction	34.6	SULTR3;1 (SULFATE TRANSPORTER 1); sulfate transporter
248756_at	At5g47560	0.738055	1.20199		1.5461	1.66346		0.992668	2.07948	1.37377	unspecified cations	3.51e-05	0.000495684	0.00101167	Significant Only by Age and CO2 and Interaction	34.14	ATSDAT/ATTDT (TONOPLAST DICARBOXYLATE TRANSPORTER); malate transporter/ sodium:dicarboxylate symporter
Not assigned
244912_at	At2g07783;AtMg00830	0.295739	1.07031		3.18688	1.34268		0.249361	2.68712	0.312819	disagreeing hits	8.72e-05	0.11962	1.12e-06	Significant Only byAge and Interaction	35.3	[ATMG00830, cytochrome c biogenesis orf382]
245016_at	AtCg00500	0.316393	1.03197		2.06183	1.0162		0.337061	2.19652	0.331909	no ontology	2.44e-05	0.0197464	1.29e-06	Significant Only by Age and CO2 and Interaction	35.1	Encodes the carboxytransferase beta subunit of the Acetyl-CoA carboxylase (ACCase) complex in plastids. This complex catalyzes the carboxylation of acetyl-CoA to produce malonyl-CoA, the first committed step in fatty acid synthesis.
263605_at	At2g16480	0.364324	1.03439		1.94943	0.969237		0.448413	2.39938	0.420168	no ontology	0.00412064	0.266155	8.75e-06	Significant Only byAge and Interaction	35.1	SWIB complex BAF60b domain-containing protein / plus-3 domain-containing protein
257025_at	At3g19190	0.393016	0.629087		1.61866	0.763676		0.657468	2.70782	0.798129	unknown	0.384178	0.0403213	0.000302158	Significant Only byCO2 and Interaction	35.2	similar to unnamed protein product; gene_id:MVI11.11 unknown protein-related [Medicago truncatula] (GB:ABE80517.1); similar to Os06g0267600 [Oryza sativa (japonica cultivar-group)] (GB:NP_001057350.1); contains domain FAMILY NOT NAMED (PTHR13190); contain
245019_at	AtCg00530	0.409862	0.891678		2.02091	1.08436		0.396417	1.95462	0.482077	unknown	8.13e-05	0.184791	3.67e-07	Significant Only byAge and Interaction	35.2	hypothetical protein
265779_at	At2g07360	0.411507	0.8201		2.07054	0.844475		0.499194	2.51174	0.514032	no ontology	0.0224357	0.027281	2.75e-08	Significant Only by Age and CO2 and Interaction	35.1	SH3 domain-containing protein
255616_at	At4g01290	0.413409	0.971053		1.94278	0.822589		0.501504	2.35677	0.424829	unknown	0.0136497	0.644977	4.75e-06	Significant Only byAge and Interaction	35.2	similar to unknown [Oryza sativa] (GB:AAF00138.1); similar to Os06g0105900 [Oryza sativa (japonica cultivar-group)] (GB:NP_001056560.1)
257334_at	AtMg01370	0.44289	1.48474		1.49799	1.04843		0.52723	1.78325	0.372297	unknown	7.28e-06	5.29e-05	4.25e-07	Significant Only by Age and CO2 and Interaction	35.2	hypothetical protein
266748_at	no_match	0.455924	1.17038		2.54081	1.12146		0.514337	2.86634	0.492838	unknown	0.315417	0.328535	4.39e-06	Significant Only by Interaction	35.2	no_match
253649_at	At4g29790	0.456667	0.859966		1.25634	0.675575		0.797573	2.19421	0.626561	unknown	0.870362	0.00586933	5.78e-06	Significant Only byCO2 and Interaction	35.2	similar to unknown protein [Arabidopsis thaliana] (TAIR:AT2G19390.1); similar to Os01g0967100 [Oryza sativa (japonica cultivar-group)] (GB:NP_001045507.1); similar to unknown protein [Oryza sativa (japonica cultivar-group)] (GB:AAU44129.1); similar to Os0
258444_at	At3g22380	0.494432	0.912045		1.72355	0.818686		0.72454	2.52569	0.650375	unknown	0.261962	0.0975265	5.69e-07	Significant Only by Interaction	35.2	similar to unknown protein [Arabidopsis thaliana] (TAIR:AT3G63180.1); similar to Os07g0571100 [Oryza sativa (japonica cultivar-group)] (GB:NP_001060049.1); similar to unknown protein [Oryza sativa (japonica cultivar-group)] (GB:BAC84664.1)
264471_at	At1g67120	0.496396	1.18502		1.19496	0.872698		0.5002	1.20411	0.368368	no ontology	0.000625789	0.0574297	0.00384957	Significant Only byAge and Interaction	35.1	midasin-related
259488_at	At1g15780	0.501215	0.918332		1.73073	1.00051		0.660232	2.27983	0.719315	unknown	0.783781	0.80065	8.19e-06	Significant Only by Interaction	35.2	similar to unknown protein [Arabidopsis thaliana] (TAIR:AT2G10440.1); similar to Globin-like [Medicago truncatula] (GB:ABE79971.1); similar to Os08g0564800 [Oryza sativa (japonica cultivar-group)] (GB:NP_001062533.1); similar to CTV.22 [Poncirus trifoliat
263165_at	At1g03060	0.504398	1.03132		1.35037	0.705932		0.889723	2.38197	0.609008	no ontology	0.384857	0.372138	7.05e-05	Significant Only by Interaction	35.1	WD-40 repeat family protein / beige-related
262505_at	At1g21680	0.50794	0.82563		1.41652	0.706667		0.932374	2.60016	0.79803	no ontology	0.000203252	0.000822322	2.08e-07	Significant Only by Age and CO2 and Interaction	35.1	similar to unknown protein [Arabidopsis thaliana] (TAIR:AT1G21670.1); similar to WD40 domain protein beta Propeller [Solibacter usitatus Ellin6076] (GB:YP_828764.1); similar to Os03g0840200 [Oryza sativa (japonica cultivar-group)] (GB:NP_001051846.1); sim
266436_at	At2g43160	0.530026	1.2327		2.43026	1.00359		0.510619	2.34128	0.415714	no ontology.epsin N-terminal homology (ENTH) domain-containing protein	0.109195	0.496368	0.00011225	Significant Only by Interaction	35.1.21	epsin N-terminal homology (ENTH) domain-containing protein
255475_at	no_match	0.531244	1.06161		1.45552	0.968703		0.452649	1.24018	0.413034	unknown	0.000440606	0.212837	0.0020658	Significant Only byAge and Interaction	35.2	no_match
264772_at	At1g22930	0.53785	0.943162		1.66674	1.00709		1.13347	3.5125	1.2103	no ontology	0.000504534	0.469348	0.00190965	Significant Only byAge and Interaction	35.1	T-complex protein 11
259117_at	At3g01320	0.538289	0.953992		1.63277	0.909103		0.758102	2.29953	0.722431	no ontology.paired amphipathic helix repeat-containing protein	0.364182	0.696244	0.000102522	Significant Only by Interaction	35.1.25	similar to paired amphipathic helix repeat-containing protein [Arabidopsis thaliana] (TAIR:AT1G70060.1); similar to ATSIN3/SIN3 (Arabidopsis thaliana sin3 homolog) [Arabidopsis thaliana] (TAIR:AT1G24190.1); similar to unknown protein [Arabidopsis thaliana
246567_at	At5g14950	0.556313	0.89182		1.7534	0.973368		0.664938	2.09576	0.725739	no ontology	0.861941	0.421979	2.67e-05	Significant Only by Interaction	35.1	ATGMII/GMII (GOLGI ALPHA-MANNOSIDASE II); alpha-mannosidase
253849_at	At4g28080	0.569186	0.949192		1.39763	0.710592		0.525238	1.28972	0.393208	unknown	3.1e-07	0.0160898	4.18e-07	Significant Only by Age and CO2 and Interaction	35.2	binding
265698_at	At2g32160	0.570793	0.559648		0.687164	0.524611		2.06117	2.48139	1.93213	unknown	9.89e-05	0.00398633	0.329533	No Interaction significant Age CO2	35.2	similar to unknown protein [Arabidopsis thaliana] (TAIR:AT2G32170.1); similar to Os05g0511300 [Oryza sativa (japonica cultivar-group)] (GB:NP_001056014.1); similar to unnamed protein product [Tetraodon nigroviridis] (GB:CAF92601.1); contains InterPro doma
264314_at	At1g70420	0.573107	0.696159		1.43848	0.849276		0.876863	2.20089	1.06972	unknown	0.000496119	0.002521	1.44e-05	Significant Only by Age and CO2 and Interaction	35.2	similar to unknown protein [Arabidopsis thaliana] (TAIR:AT1G23710.1); similar to Protein of unknown function DUF1645 [Medicago truncatula] (GB:ABE93113.1); contains InterPro domain Protein of unknown function DUF1645; (InterPro:IPR012442)
257912_at	At3g25500	0.57347	1.10866		1.62293	0.836969		0.628226	1.77789	0.474271	no ontology.formin homology 2 domain-containing protein	0.00362697	0.928061	2.82e-06	Significant Only byAge and Interaction	35.1.20	AFH1 (FORMIN HOMOLOGY 1); actin binding
247194_at	At5g65480	0.585774	0.872143		1.70639	1.18203		0.701177	2.04257	0.950317	unknown	0.220747	0.86017	0.0005032	Significant Only by Interaction	35.2	similar to unknown protein [Arabidopsis thaliana] (TAIR:AT4G38060.2); similar to unknown [Lycopersicon esculentum] (GB:AAK84476.1)
259104_at	At3g02170	0.586779	0.697111		1.57243	0.814642		0.751927	2.01499	0.8787	unknown	0.194292	0.0195106	0.000367457	Significant Only byCO2 and Interaction	35.2	LNG2 (LONGIFOLIA2)
251145_at	At3g63500	0.60085	0.887321		1.43161	0.862388		0.867191	2.0662	0.842824	unknown	0.0941294	0.338954	0.000593891	Significant Only by Interaction	35.2	similar to unknown protein [Arabidopsis thaliana] (TAIR:AT1G14740.1); similar to hypothetical protein [Malus x domestica] (GB:CAJ44362.1); contains InterPro domain Arabidopsis thaliana 130.7kDa hypothetical protein; (InterPro:IPR004082)
253209_at	At4g34830	0.601867	0.888662		1.4023	0.790709		0.466726	1.08743	0.415281	no ontology.pentatricopeptide (PPR) repeat-containing protein	8.74e-07	0.0553033	2.82e-05	Significant Only byAge and Interaction	35.1.5	binding
249134_at	At5g43150	0.602511	0.766878		1.30731	1.07338		1.04579	2.26913	1.46377	unknown	0.000789864	0.769804	0.0183239	Significant Only byAge and Interaction	35.2	similar to hypothetical protein MtrDRAFT_AC141109g4v1 [Medicago truncatula] (GB:ABE79896.1)
247488_at	At5g61820	0.616175	0.793475		1.15206	1.10174		1.13987	2.13121	1.58271	unknown	7.49e-06	0.362083	0.0068472	Significant Only byAge and Interaction	35.2	similar to hypothetical protein [Trifolium pratense] (GB:BAE71234.1); contains InterPro domain Stress up-regulated Nod 19; (InterPro:IPR011692)
261053_at	At1g01320	0.620125	0.894384		1.26639	0.768199		0.581422	1.18735	0.499391	no ontology.pentatricopeptide (PPR) repeat-containing protein	1.98e-06	0.00967991	5.66e-06	Significant Only by Age and CO2 and Interaction	35.1.5	tetratricopeptide repeat (TPR)-containing protein
246562_at	At5g15580	0.623104	0.996893		1.32501	0.98535		1.0106	2.14902	0.9989	unknown	0.00199296	0.948743	0.000566462	Significant Only byAge and Interaction	35.2	LNG1 (LONGIFOLIA1)
251372_at	At3g60520	0.627117	0.924113		1.27712	0.838367		1.16228	2.36697	1.05443	unknown	3.52e-05	0.166803	0.00013883	Significant Only byAge and Interaction	35.2	zinc ion binding
263900_at	At2g36290	0.635616	1.0635		1.64068	1.00009		0.780592	2.0149	0.734056	no ontology	0.457303	0.678962	7.36e-05	Significant Only by Interaction	35.1	hydrolase, alpha/beta fold family protein
256353_at	At1g55000	0.642733	0.84666		1.42039	0.976468		0.925412	2.04509	1.06729	no ontology	4.26e-06	0.0208638	2.52e-07	Significant Only by Age and CO2 and Interaction	35.1	peptidoglycan-binding LysM domain-containing protein
264516_at	At1g10090	0.643385	0.97964		1.94516	1.27883		0.824158	2.4917	1.07586	unknown	0.00010462	0.017011	2.22e-06	Significant Only by Age and CO2 and Interaction	35.2	similar to RXW8 [Arabidopsis thaliana] (TAIR:AT1G58520.1); similar to Os12g0633600 [Oryza sativa (japonica cultivar-group)] (GB:NP_001067352.1); similar to Protein of unknown function DUF221 [Medicago truncatula] (GB:ABE86757.1); similar to Os03g0673800 [
266410_at	At2g38770	0.644536	1.0309		1.7945	0.878337		0.510791	1.42213	0.435199	unknown	0.000264233	0.816215	3.77e-05	Significant Only byAge and Interaction	35.2	similar to LBA1/UPF1 (LOW-LEVEL BETA-AMYLASE 1), RNA helicase [Arabidopsis thaliana] (TAIR:AT5G47010.1); similar to putative aquarius [Oryza sativa (japonica cultivar-group)] (GB:AAT78813.1); similar to expressed protein [Oryza sativa (japonica cultivar-g
267503_at	At2g45600	0.647622	0.657773		1.39674	0.893996		1.16415	2.51075	1.58223	unknown	0.000216673	0.0735765	0.0139843	Significant Only byAge and Interaction	35.2	similar to unknown protein [Arabidopsis thaliana] (TAIR:AT2G45610.1); similar to CXE carboxylesterase [Malus pumila] (GB:ABB89004.1); contains InterPro domain Esterase/lipase/thioesterase; (InterPro:IPR000379); contains InterPro domain Alpha/beta hydrolas
258167_at	At3g21560	0.654159	1.30702		2.21177	1.405		0.674943	2.28204	0.725543	no ontology	0.425508	0.00592553	5.22e-06	Significant Only byCO2 and Interaction	35.1	UGT84A2; UDP-glycosyltransferase/ sinapate 1-glucosyltransferase
259072_at	At3g11700	0.658609	1.18762		2.04924	1.22553		0.536035	1.66785	0.553144	no ontology	0.000107597	0.00658053	5.47e-08	Significant Only by Age and CO2 and Interaction	35.1	beta-Ig-H3 domain-containing protein / fasciclin domain-containing protein
256041_at	At1g07230	0.659809	1.08369		1.51814	1.10966		1.20144	2.76436	1.23023	no ontology	1.33e-05	0.322584	0.000329169	Significant Only byAge and Interaction	35.1	phosphoesterase family protein
253647_at	At4g29950	0.659985	1.0607		1.55337	1.07521		0.921282	2.16838	0.933886	unknown	0.00835251	0.56102	0.000224471	Significant Only byAge and Interaction	35.2	microtubule-associated protein
249122_at	At5g43850	0.660395	0.865485		1.36417	1.177		0.974499	2.01302	1.32526	no ontology	0.000942647	0.976101	0.0060892	Significant Only byAge and Interaction	35.1	ATARD4; acireductone dioxygenase (Fe2+-requiring)/ metal ion binding
264458_at	At1g10410	0.667897	0.956822		1.24514	1.16273		1.10329	2.05684	1.34071	unknown	4.86e-08	0.0660001	1.79e-05	Significant Only byAge and Interaction	35.2	similar to CW14 [Arabidopsis thaliana] (TAIR:AT1G59650.1); similar to expressed protein [Oryza sativa (japonica cultivar-group)] (GB:ABF98316.1); contains InterPro domain Protein of unknown function DUF1336; (InterPro:IPR009769)
249010_at	At5g44580	0.674922	0.804477		0.750465	0.597677		2.10637	2.34213	1.5649	unknown	0.000171876	0.0377843	0.246539	No Interaction significant Age CO2	35.2	similar to unknown protein [Arabidopsis thaliana] (TAIR:AT5G44582.1)
258946_at	At3g10650	0.685451	1.04314		1.63432	0.873646		0.560428	1.33623	0.469367	unknown	2.4e-05	0.767295	4.45e-06	Significant Only byAge and Interaction	35.2	similar to structural constituent of nuclear pore [Arabidopsis thaliana] (TAIR:AT2G45000.1); similar to Os03g0788300 [Oryza sativa (japonica cultivar-group)] (GB:NP_001051501.1); similar to expressed protein [Oryza sativa (japonica cultivar-group)] (GB:AB
245941_at	At5g19820	0.687925	1.01974		1.18455	0.868217		0.533549	0.918728	0.454267	no ontology	1.58e-06	0.129943	0.00075363	Significant Only byAge and Interaction	35.1	EMB2734 (EMBRYO DEFECTIVE 2734); lyase
259752_at	At1g71040	0.688997	0.962495		0.987874	0.763417		1.40352	2.01235	1.11323	no ontology	0.00042474	0.185574	0.0437318	Significant Only byAge and Interaction	35.1	multi-copper oxidase type I family protein
264310_at	At1g62030	0.691459	1.02111		1.77133	0.656343		0.577325	1.47895	0.371088	no ontology	0.00602637	0.255945	0.00040222	Significant Only byAge and Interaction	35.1	DC1 domain-containing protein
247780_at	At5g58770	0.693178	0.591514		0.428839	0.544047		1.60166	0.990879	1.47314	no ontology	0.00229625	3.55e-05	0.0214791	Significant Only by Age and CO2 and Interaction	35.1	dehydrodolichyl diphosphate synthase, putative / DEDOL-PP synthase, putative
248059_at	At5g55540	0.708654	0.920879		1.38735	0.624329		0.652679	1.27777	0.442497	unknown	1.07e-05	0.00185524	1.71e-06	Significant Only by Age and CO2 and Interaction	35.2	TRN1 (LOPPED 1, TORNADO 1)
259222_at	At3g03680	0.714676	1.10267		1.42881	0.776991		0.622297	1.24412	0.4385	no ontology.C2 domain-containing protein	0.000380132	0.96627	0.000279485	Significant Only byAge and Interaction	35.1.19	C2 domain-containing protein
260663_at	At1g19525	0.734521	1.0533		1.11782	0.727715		0.666256	1.01393	0.460309	unknown	0.000287908	0.441286	0.00587813	Significant Only byAge and Interaction	35.2	pentatricopeptide (PPR) repeat-containing protein
257708_at	At3g13330	0.742582	0.975357		1.26338	0.797034		1.23813	2.10648	1.01176	unknown	0.000218816	0.136711	0.00120613	Significant Only byAge and Interaction	35.2	binding
260670_at	At1g19520	0.74794	1.14663		1.36405	1.03095		0.538577	0.982223	0.48424	no ontology.pentatricopeptide (PPR) repeat-containing protein	8.99e-05	0.352875	0.00603879	Significant Only byAge and Interaction	35.1.5	NFD5 (NUCLEAR FUSION DEFECTIVE 5); transcription factor
264989_at	At1g27200	0.764956	1.2533		1.80825	1.10695		1.39181	3.29003	1.22929	unknown	2e-05	0.0326019	0.000470499	Significant Only by Age and CO2 and Interaction	35.2	similar to zinc finger (C3HC4-type RING finger) family protein [Arabidopsis thaliana] (TAIR:AT3G27330.1); similar to Os08g0121900 [Oryza sativa (japonica cultivar-group)] (GB:NP_001060883.1); similar to zinc finger (C3HC4-type RING finger) protein family-
245385_at	At4g14020	0.771213	0.832695		1.68593	1.1474		1.15126	2.51675	1.58637	no ontology	4.7e-05	0.0574225	0.00344993	Significant Only byAge and Interaction	35.1	rapid alkalinization factor (RALF) family protein
253238_at	At4g34480	0.77145	1.07943		1.57551	0.894195		1.08536	2.21661	0.899109	no ontology	0.000371403	0.0275211	3.88e-05	Significant Only by Age and CO2 and Interaction	35.1	glycosyl hydrolase family 17 protein
267044_at	At2g34357	0.779591	1.21253		1.21931	0.816558		0.661602	1.03477	0.445545	unknown	0.000670268	0.650701	0.00662764	Significant Only byAge and Interaction	35.2	binding
253446_at	At4g32620	0.78474	1.19454		1.59973	0.780236		0.759348	1.54797	0.495981	unknown	0.0126526	0.114783	4.11e-06	Significant Only byAge and Interaction	35.2	nucleic acid binding
259021_at	At3g07540	0.793399	1.46969		1.24202	0.686821		0.950016	1.4872	0.443965	no ontology.formin homology 2 domain-containing protein	0.0681627	0.644964	0.000175	Significant Only by Interaction	35.1.20	formin homology 2 domain-containing protein / FH2 domain-containing protein
258925_at	At3g10420	0.800941	0.835436		1.53551	1.13741		1.07458	2.06012	1.46301	no ontology	0.000222232	0.139203	0.0089422	Significant Only byAge and Interaction	35.1	sporulation protein-related
255460_at	At4g02800	0.809415	1.01769		0.553325	0.820891		0.6597	0.450978	0.532127	unknown	2.21e-05	0.0196742	0.661981	No Interaction significant Age CO2	35.2	similar to unknown protein [Arabidopsis thaliana] (TAIR:AT5G01970.1); similar to Os04g0228100 [Oryza sativa (japonica cultivar-group)] (GB:NP_001052288.1); similar to H0209A05.2 [Oryza sativa (indica cultivar-group)] (GB:CAH66085.1)
258207_at	At3g14050	0.811174	1.14954		2.03984	1.48283		1.08754	2.73481	1.40286	no ontology	0.000312961	0.0329228	0.00406256	Significant Only by Age and CO2 and Interaction	35.1	RSH2 (RELA-SPOT HOMOLOG); catalytic
261445_at	At1g28380	0.814306	1.10316		1.49228	1.03075		1.14443	2.09725	1.06931	unknown	0.00037066	0.163841	0.00142547	Significant Only byAge and Interaction	35.2	NSL1 (NECROTIC SPOTTED LESIONS 1)
263159_at	At1g54130	0.815585	0.770632		1.48442	1.19256		1.13299	2.06212	1.75332	no ontology	0.000296287	0.287224	0.0427343	Significant Only byAge and Interaction	35.1	RSH3 (RELA/SPOT HOMOLOG 3); catalytic
257734_at	At3g18370	0.82502	0.970296		1.35718	0.89962		1.30789	2.15151	1.21262	no ontology.C2 domain-containing protein	0.000311837	0.200521	0.018394	Significant Only byAge and Interaction	35.1.19	C2 domain-containing protein
263931_at	At2g36220	0.830681	0.877424		2.03155	1.30651		1.24515	3.0452	1.85407	unknown	0.000677045	0.0936442	0.0320536	Significant Only byAge and Interaction	35.2	similar to unknown protein [Arabidopsis thaliana] (TAIR:AT3G52710.1); similar to Os11g0153300 [Oryza sativa (japonica cultivar-group)] (GB:NP_001065777.1); similar to calcium/calmodulin protein kinase 1 [Nicotiana tabacum] (GB:AAN71903.1)
258668_at	no_match	0.845985	1.14003		1.83661	0.930067		0.925489	2.00921	0.755038	unknown	0.104348	0.0403584	0.000846523	Significant Only byCO2 and Interaction	35.2	no_match
253022_at	At4g38060	0.847309	1.15648		1.69864	1.12138		1.04769	2.10034	1.01589	unknown	0.00161503	0.0429634	0.000900513	Significant Only by Age and CO2 and Interaction	35.2	similar to unknown protein [Arabidopsis thaliana] (TAIR:AT5G65480.1); similar to unknown [Lycopersicon esculentum] (GB:AAK84476.1)
246125_at	At5g19875	0.856915	1.35644		1.5234	1.36841		1.29	2.29333	1.30139	unknown	0.000296339	0.0435146	0.034111	Significant Only by Age and CO2 and Interaction	35.2	similar to oxidoreductase/ transition metal ion binding [Arabidopsis thaliana] (TAIR:AT2G31940.1); similar to conserved hypothetical protein [Medicago truncatula] (GB:ABE77569.1)
262766_at	At1g13160	0.861545	1.34293		1.0331	0.949037		0.642222	0.770104	0.453853	no ontology	3.34e-07	0.00423957	0.00077266	Significant Only by Age and CO2 and Interaction	35.1	SDA1 family protein
250277_at	At5g12940	0.891233	1.05037		1.78728	0.960641		1.27967	2.56625	1.17036	no ontology	5.64e-05	0.00474621	0.000604545	Significant Only by Age and CO2 and Interaction	35.1	leucine-rich repeat family protein
254667_at	At4g18280	0.918139	1.88461		1.69557	2.38887		1.11417	2.0576	1.41228	no ontology.glycine rich proteins	0.000572844	2.45e-05	0.0541294	No Interaction significant Age CO2	35.1.40	glycine-rich cell wall protein-related
266668_at	At2g29760	0.960172	1.40165		0.903494	0.982648		0.644455	0.606414	0.451803	no ontology.pentatricopeptide (PPR) repeat-containing protein	1.13e-06	0.00863029	0.017446	Significant Only by Age and CO2 and Interaction	35.1.5	pentatricopeptide (PPR) repeat-containing protein
265083_at	At1g03820	0.987322	1.50969		1.76084	1.43024		1.59387	2.84259	1.51	no ontology	3.11e-09	1.3e-05	2.01e-05	Significant Only by Age and CO2 and Interaction	35.1	similar to unknown protein [Arabidopsis thaliana] (TAIR:AT2G33850.1); similar to arabinogalactan-protein; AGP [Pyrus communis] (GB:AAB35283.1)
249174_at	At5g42900	1.03307	0.752199		0.793684	0.513484		2.11447	1.6245	1.44343	unknown	1.64e-06	9.86e-05	0.00632316	Significant Only by Age and CO2 and Interaction	35.2	similar to unknown protein [Arabidopsis thaliana] (TAIR:AT4G33980.1); similar to hypothetical protein MtrDRAFT_AC151424g24v1 [Medicago truncatula] (GB:ABE88920.1)
266170_at	At2g39050	1.06874	1.00411		1.76259	1.38679		1.44609	2.38493	1.99721	no ontology.hydroxyproline rich proteins	6.07e-07	0.00200775	0.00502493	Significant Only by Age and CO2 and Interaction	35.1.41	hydroxyproline-rich glycoprotein family protein
259009_at	At3g09260	1.0857	2.34807		0.959308	1.20987		0.304636	0.269172	0.156967	no ontology	1.58e-06	0.00140701	0.00318672	Significant Only by Age and CO2 and Interaction	35.1	PYK10 (phosphate starvation-response 3.1); hydrolase, hydrolyzing O-glycosyl compounds
267524_at	At2g30600	1.08953	1.11314		1.74824	1.47325		0.386066	0.619476	0.510963	no ontology.BTB/POZ domain-containing protein	1.58e-07	0.0193243	0.274308	No Interaction significant Age CO2	35.1.9	BTB/POZ domain-containing protein
256062_at	At1g07090	1.10462	1.51272		1.61224	1.64295		1.51072	2.20495	1.64078	unknown	4.83e-05	0.0053597	0.129198	No Interaction significant Age CO2	35.2	similar to unknown protein [Arabidopsis thaliana] (TAIR:AT5G58500.1); similar to hypothetical protein [Oryza sativa (japonica cultivar-group)] (GB:BAB68109.1); contains InterPro domain Protein of unknown function DUF640; (InterPro:IPR006936)
264160_at	At1g65450	1.16047	1.21571		1.54347	1.313		1.50817	2.00593	1.62886	no ontology	4.93e-05	0.0289222	0.164433	No Interaction significant Age CO2	35.1	transferase family protein
245937_at	At5g19750	1.17495	0.979713		0.642274	0.931619		0.840124	0.459244	0.798882	no ontology	0.000154462	0.705061	0.0137105	Significant Only byAge and Interaction	35.1	peroxisomal membrane 22 kDa family protein
265776_at	At2g07340	1.20619	1.01143		0.549731	1.07942		1.01715	0.463575	1.08552	no ontology	0.0038566	0.0438228	0.000114435	Significant Only by Age and CO2 and Interaction	35.1	prefoldin-related KE2 family protein
264636_at	At1g65490	1.21334	2.25444		1.17117	1.47319		1.39409	1.34564	0.910988	unknown	0.0413081	3.94e-06	0.0244617	Significant Only by Age and CO2 and Interaction	35.2	similar to unknown protein [Arabidopsis thaliana] (TAIR:AT1G65500.1)
255255_at	At4g05070	1.2224	0.9055		0.589382	1.0958		2.24552	1.08269	2.71744	unknown	0.000105193	0.14897	0.01111	Significant Only byAge and Interaction	35.2	similar to wound induced protein-like [Vitis vinifera] (GB:AAO12870.1)
253635_at	At4g30620	1.23052	1.07492		0.593305	0.953903		0.841231	0.405605	0.746527	unknown	0.000575933	0.758627	0.0372833	Significant Only byAge and Interaction	35.2	similar to unknown protein [Arabidopsis thaliana] (TAIR:AT2G24020.1); similar to Conserved hypothetical protein 103 [Medicago truncatula] (GB:ABE78786.1); contains InterPro domain Conserved hypothetical protein 103; (InterPro:IPR004401)
251119_at	At3g63510	1.25126	0.910359		0.736193	0.951288		0.785092	0.461917	0.820389	no ontology	2.67e-05	0.420065	0.00377208	Significant Only byAge and Interaction	35.1	FAD binding / oxidoreductase
251371_at	At3g60360	1.26351	1.23438		0.700226	1.12079		0.83489	0.462689	0.758062	unknown	0.000186505	0.139521	0.0329422	Significant Only byAge and Interaction	35.2	EDA14/UTP11 (U3 SMALL NUCLEOLAR RNA-ASSOCIATED PROTEIN 11, embryo sac development arrest 14)
247414_at	At5g63050	1.27941	0.987796		0.692278	0.954852		0.919749	0.497667	0.889075	unknown	0.000207816	0.899209	0.0014124	Significant Only byAge and Interaction	35.2	EMB2759 (EMBRYO DEFECTIVE 2759)
254794_at	At4g12970	1.28293	0.96937		0.657652	0.975015		0.856653	0.439136	0.861642	unknown	0.000734474	0.954979	0.0103401	Significant Only byAge and Interaction	35.2	similar to Os01g0914400 [Oryza sativa (japonica cultivar-group)] (GB:NP_001045180.1); similar to hypothetical protein [Oryza sativa (japonica cultivar-group)] (GB:BAC75419.1)
266889_at	At2g44640	1.28919	1.04859		0.73817	1.04784		0.794311	0.454809	0.793737	unknown	3.69e-05	0.802006	0.00704774	Significant Only byAge and Interaction	35.2	similar to PDE320 (PIGMENT DEFECTIVE 320) [Arabidopsis thaliana] (TAIR:AT3G06960.1); similar to Os01g0251000 [Oryza sativa (japonica cultivar-group)] (GB:NP_001042598.1); similar to unknown protein [Oryza sativa (japonica cultivar-group)] (GB:BAD81221.1)
262738_at	At1g28530	1.3279	1.05432		0.72982	0.955761		0.85284	0.468724	0.773115	unknown	0.00055343	0.863579	0.0279611	Significant Only byAge and Interaction	35.2	similar to hypothetical protein [Oryza sativa (japonica cultivar-group)] (GB:BAD07831.1)
245776_at	At1g30260	1.32965	0.60878		0.855721	0.692548		1.86528	1.20044	2.12195	unknown	1.66e-05	0.000660178	0.0444649	Significant Only by Age and CO2 and Interaction	35.2	AGL79 (AGAMOUS-LIKE 79)
247386_at	At5g63420	1.34801	1.00422		0.778669	0.909895		0.821267	0.4744	0.744125	no ontology	5.1e-05	0.317039	0.00947635	Significant Only byAge and Interaction	35.1	EMB2746 (EMBRYO DEFECTIVE 2746); catalytic
264831_at	At1g03687	1.3481	0.977148		0.755531	0.947522		0.856003	0.47974	0.83005	no ontology	3.04e-05	0.292471	0.00126153	Significant Only byAge and Interaction	35.1	similar to COG3148: Uncharacterized conserved protein [Yersinia intermedia ATCC 29909] (GB:ZP_00833766.1); similar to Os06g0342600 [Oryza sativa (japonica cultivar-group)] (GB:NP_001057573.1); contains InterPro domain DTW; (InterPro:IPR005636)
245426_at	At4g17540	1.35754	1.17779		0.689252	1.08904		0.884766	0.449214	0.818095	unknown	4.78e-05	0.225694	0.00168137	Significant Only byAge and Interaction	35.2	similar to Os10g0563400 [Oryza sativa (japonica cultivar-group)] (GB:NP_001065401.1)
247862_at	At5g58250	1.36132	0.967467		0.632499	0.984144		0.955057	0.44374	0.971519	unknown	0.000177485	0.888996	0.000107603	Significant Only byAge and Interaction	35.2	similar to expressed protein [Oryza sativa (japonica cultivar-group)] (GB:ABF95764.1)
258501_at	At3g06780	1.36376	0.902715		0.886492	1.22581		1.82274	1.18485	2.47513	no ontology.glycine rich proteins	0.000179188	0.702607	0.0392259	Significant Only byAge and Interaction	35.1.40	glycine-rich protein
261296_at	At1g48460	1.36679	1.30207		0.768187	1.08174		0.877632	0.493261	0.729128	unknown	5.11e-05	0.0937301	0.0106027	Significant Only byAge and Interaction	35.2	similar to unknown protein [Arabidopsis thaliana] (TAIR:AT5G63040.2); similar to Os01g0704200 [Oryza sativa (japonica cultivar-group)] (GB:NP_001044004.1); similar to hypothetical protein MtrDRAFT_AC124952g33v1 [Medicago truncatula] (GB:ABE93586.1); conta
256577_at	At3g28220	1.38322	2.73516		4.30616	4.25209		0.545263	1.69748	0.84767	no ontology	0.891242	0.000118653	0.0370963	Significant Only byCO2 and Interaction	35.1	meprin and TRAF homology domain-containing protein / MATH domain-containing protein
260585_at	At2g43650	1.40581	1.24778		0.835738	0.981222		0.803526	0.477686	0.631874	no ontology	2.29e-05	0.260745	0.0263685	Significant Only byAge and Interaction	35.1	Sas10/U3 ribonucleoprotein (Utp) family protein
263209_at	At1g10522	1.41583	1.36514		0.911956	1.21493		0.688009	0.443156	0.612306	unknown	6.38e-06	0.0348544	0.0558074	No Interaction significant Age CO2	35.2	similar to conserved hypothetical protein [Medicago truncatula] (GB:ABE91480.1); similar to Os09g0382400 [Oryza sativa (japonica cultivar-group)] (GB:NP_001063064.1)
248679_at	At5g48830	1.41703	0.895023		0.554576	0.758784		1.13233	0.443155	0.959973	unknown	0.000177266	0.00974337	3.41e-06	Significant Only by Age and CO2 and Interaction	35.2	similar to unknown protein [Oryza sativa (japonica cultivar-group)] (GB:BAD22996.1)
261882_at	At1g80770	1.42258	1.05426		0.564237	0.960786		1.11598	0.442632	1.01703	no ontology	0.00100158	0.815293	1.54e-05	Significant Only byAge and Interaction	35.1	PDE318 (PIGMENT DEFECTIVE 318); GTP binding
247555_at	At5g61020	1.43444	1.15996		0.647844	1.04648		1.07511	0.485558	0.96992	no ontology	0.000696713	0.263986	5.75e-05	Significant Only byAge and Interaction	35.1	ECT3 (evolutionary conserved C-terminal 3)
260586_at	At2g43630	1.46612	0.967347		0.603234	1.02534		1.01602	0.418039	1.07693	unknown	0.00325849	0.903294	0.000207691	Significant Only byAge and Interaction	35.2	similar to glycine-rich protein [Arabidopsis thaliana] (TAIR:AT3G59640.2); similar to glycine-rich protein, related [Medicago truncatula] (GB:ABE86768.1)
254137_at	At4g24930	1.46869	0.909359		0.575014	1.01772		1.10343	0.43201	1.23492	no ontology	0.00574439	0.812147	3.9e-06	Significant Only byAge and Interaction	35.1	thylakoid lumenal 17.9 kDa protein, chloroplast
249365_at	At5g40600	1.4705	0.96092		0.561114	1.03826		1.30192	0.496787	1.4067	unknown	0.834298	0.795744	6.06e-05	Significant Only by Interaction	35.2	EMB1875 (EMBRYO DEFECTIVE 1875)
258424_at	At3g16750	1.47434	0.905666		0.495206	0.755693		1.48502	0.498793	1.23911	unknown	0.832352	0.022127	4.01e-06	Significant Only byCO2 and Interaction	35.2	similar to shell matrix protein [Pinctada fucata] (GB:BAD00044.1)
251355_at	At3g61100	1.48812	1.52644		0.741416	1.19483		0.881013	0.43894	0.689616	unknown	2.57e-05	0.00630948	0.00570586	Significant Only by Age and CO2 and Interaction	35.2	similar to unknown protein [Arabidopsis thaliana] (TAIR:AT3G61090.1); contains InterPro domain Protein of unknown function DUF537; (InterPro:IPR007491)
253283_at	At4g34090	1.4912	0.955746		0.599976	0.81104		1.20618	0.485297	1.02356	unknown	0.0180086	0.181306	0.00012796	Significant Only byAge and Interaction	35.2	similar to unknown protein [Arabidopsis thaliana] (TAIR:AT2G23370.1); similar to Hypothetical protein [Oryza sativa (japonica cultivar-group)] (GB:AAN61482.1); similar to Os03g0109700 [Oryza sativa (japonica cultivar-group)] (GB:NP_001048710.1); contains
267523_at	At2g30600	1.4999	1.07835		0.925644	1.2278		0.707753	0.43678	0.805842	no ontology.BTB/POZ domain-containing protein	1.55e-06	0.0134728	0.000543328	Significant Only by Age and CO2 and Interaction	35.1.9	BTB/POZ domain-containing protein
247854_at	At5g58200	1.5002	0.951649		0.67099	0.891066		2.12929	0.952362	1.99374	unknown	4.29e-05	0.560563	0.00128706	Significant Only byAge and Interaction	35.2	similar to Metallophosphoesterase [Crocosphaera watsonii WH 8501] (GB:ZP_00514094.1); similar to Os06g0182400 [Oryza sativa (japonica cultivar-group)] (GB:NP_001056984.1); contains domain Metallo-dependent phosphatases (SSF56300)
261540_at	At1g63610	1.50388	0.93991		0.700278	1.02499		1.04196	0.485188	1.13628	unknown	0.000589404	0.115615	3.17e-06	Significant Only byAge and Interaction	35.2	similar to unknown protein [Arabidopsis thaliana] (TAIR:AT2G14910.1); similar to Os02g0833400 [Oryza sativa (japonica cultivar-group)] (GB:NP_001048635.1); similar to expressed protein [Oryza sativa (japonica cultivar-group)] (GB:AAR87215.1)
245771_at	no_match	1.51329	0.425531		0.845663	0.886411		2.40291	1.3428	5.00543	unknown	3.76e-06	0.0419003	0.0197131	Significant Only by Age and CO2 and Interaction	35.2	no_match
251307_at	At3g61200	1.51402	1.04861		0.814231	1.34616		1.62845	0.875768	2.09053	no ontology	1.04e-05	0.0152749	2.92e-05	Significant Only by Age and CO2 and Interaction	35.1	thioesterase family protein
257207_at	At3g14900	1.51707	1.63654		0.78301	1.33619		0.730048	0.376802	0.596063	unknown	7.51e-05	0.0173738	0.0682829	No Interaction significant Age CO2	35.2	similar to zinc finger protein-related [Arabidopsis thaliana] (TAIR:AT5G63740.1); similar to unknown protein [Arabidopsis thaliana] (TAIR:AT3G17160.1); similar to Os04g0497900 [Oryza sativa (japonica cultivar-group)] (GB:NP_001053209.1); similar to OSIGBa
250537_at	At5g08565	1.51749	1.04489		0.519079	0.780674		1.45366	0.497244	1.08608	unknown	0.34914	0.3492	7.7e-05	Significant Only by Interaction	35.2	positive transcription elongation factor/ zinc ion binding
245064_at	At2g39725	1.52645	1.07622		0.904624	1.81561		1.35935	0.805594	2.29326	no ontology	0.00356705	0.0109617	0.000873299	Significant Only by Age and CO2 and Interaction	35.1	complex 1 family protein / LVR family protein
256017_at	At1g19180	1.52873	2.18253		2.07821	2.6636		1.31317	1.78517	1.60262	unknown	0.00165698	0.000281842	0.201708	No Interaction significant Age CO2	35.2	similar to unknown protein [Arabidopsis thaliana] (TAIR:AT1G74950.1); similar to PnFL-2 [Ipomoea nil] (GB:AAG49896.1); contains InterPro domain ZIM; (InterPro:IPR010399)
262572_at	At1g15140	1.53694	0.997795		0.73587	1.0258		0.972361	0.465555	0.999652	no ontology	1.45e-05	0.0275862	2.92e-06	Significant Only by Age and CO2 and Interaction	35.1	oxidoreductase NAD-binding domain-containing protein
263763_at	At2g21385	1.53724	0.865101		0.52903	0.953272		1.11295	0.383015	1.22638	unknown	0.000534012	0.17688	3.54e-07	Significant Only byAge and Interaction	35.2	similar to Os09g0531100 [Oryza sativa (japonica cultivar-group)] (GB:NP_001063753.1); similar to conserved hypothetical protein [Medicago truncatula] (GB:ABE89529.1)
265330_at	At2g18440	1.54254	1.1145		0.510113	0.908179		2.12219	0.701801	1.72931	no ontology	0.00302459	0.297002	0.000906118	Significant Only byAge and Interaction	35.1	GUT15 (GENE WITH UNSTABLE TRANSCRIPT 15)
261112_at	At1g75420	1.54898	1.00936		0.610016	1.10083		1.92367	0.757579	2.098	no ontology	5.27e-07	0.0423383	3.2e-07	Significant Only by Age and CO2 and Interaction	35.1	glycosyl transferase family 1 protein
263637_at	At2g11890	1.56547	1.18015		0.584994	0.90904		1.33086	0.497322	1.02512	unknown	0.00958613	0.861957	1.19e-06	Significant Only byAge and Interaction	35.2	adenylate cyclase
252362_at	At3g48500	1.57372	1.29803		0.697701	1.33179		0.818029	0.362669	0.839305	unknown	0.000462385	0.096424	0.00729304	Significant Only byAge and Interaction	35.2	PDE312/PTAC10 (PIGMENT DEFECTIVE 312); RNA binding
265831_at	At2g14460	1.58222	1.1257		0.433428	0.918684		1.7104	0.468542	1.39586	unknown	0.161283	0.0746598	2.26e-06	Significant Only by Interaction	35.2	unknown protein
264222_at	At1g60230	1.58362	0.793951		0.629701	0.899288		1.01524	0.403692	1.14994	no ontology	0.00163639	0.0258772	4.63e-05	Significant Only by Age and CO2 and Interaction	35.1	radical SAM domain-containing protein
252034_at	At3g52040	1.58423	1.13451		0.484491	1.08615		1.37301	0.419897	1.31449	unknown	0.475489	0.228508	5.27e-05	Significant Only by Interaction	35.2	similar to unknown [Hyacinthus orientalis] (GB:AAS20983.1)
265902_at	At2g25590	1.58915	0.971864		0.782899	1.09055		2.28746	1.12692	2.56679	no ontology.agenet domain-containing protein	1.16e-06	0.811426	0.000937432	Significant Only byAge and Interaction	35.1.2	agenet domain-containing protein
254779_at	At4g12760	1.61897	1.16336		0.513536	0.969415		2.08578	0.661608	1.73805	unknown	8.41e-05	0.0612169	4.56e-06	Significant Only byAge and Interaction	35.2	similar to Os05g0417300 [Oryza sativa (japonica cultivar-group)] (GB:NP_001055562.1)
245816_at	At1g26210	1.61999	1.26902		0.712057	1.0777		0.865149	0.380271	0.734716	unknown	0.000711612	0.341273	0.0172445	Significant Only byAge and Interaction	35.2	similar to unknown protein [Arabidopsis thaliana] (TAIR:AT1G68870.1); similar to PREDICTED: similar to Mystery 45A CG8070-PA isoform 1 [Apis mellifera] (GB:XP_624659.1); similar to Os08g0486700 [Oryza sativa (japonica cultivar-group)] (GB:NP_001062097.1)
257773_at	At3g29185	1.65131	0.97963		0.724275	0.982082		1.11678	0.489827	1.11958	unknown	0.00187632	0.0185286	5.56e-06	Significant Only by Age and CO2 and Interaction	35.2	similar to hypothetical protein MtrDRAFT_AC147482g2v1 [Medicago truncatula] (GB:ABD32485.1)
249727_at	At5g35490	1.65167	1.72648		1.05963	1.42766		2.01702	1.29402	1.66791	unknown	1.95e-05	0.00121746	0.129492	No Interaction significant Age CO2	35.2	unknown protein
254208_at	At4g24175	1.65602	1.14352		0.580415	1.12945		0.853726	0.29922	0.843217	unknown	2.2e-05	0.246855	0.000143105	Significant Only byAge and Interaction	35.2	similar to OSJNBa0024J22.22 [Oryza sativa (japonica cultivar-group)] (GB:CAD37109.2); similar to Os04g0250700 [Oryza sativa (japonica cultivar-group)] (GB:NP_001052315.1); contains domain KINESIN HEAVY CHAIN (PTHR16012); contains domain KINESIN MOTOR PROT
250292_at	At5g13220	1.68585	2.4539		1.78342	2.42775		1.05611	1.11724	1.04486	unknown	0.612027	0.00085409	0.969213	CO2 Regulated only	35.2	similar to unknown protein [Arabidopsis thaliana] (TAIR:AT5G20900.1); similar to P0482D04.10 [Oryza sativa (japonica cultivar-group)] (GB:BAB89663.1); similar to Os04g0395800 [Oryza sativa (japonica cultivar-group)] (GB:NP_001052661.1); similar to Os10g03
249026_at	At5g44785	1.69508	1.23466		0.578188	1.02626		1.29775	0.442661	1.0787	unknown	0.0752136	0.524158	0.000336332	Significant Only by Interaction	35.2	single-stranded DNA binding
260656_at	At1g19380	1.7051	1.87316		1.31355	1.64851		2.00853	1.5473	1.76764	unknown	8.33e-07	3.61e-05	0.230376	No Interaction significant Age CO2	35.2	similar to unknown protein [Arabidopsis thaliana] (TAIR:AT5G65650.1); similar to unknown [Vitis pseudoreticulata] (GB:ABC69762.1); contains InterPro domain Protein of unknown function DUF1195; (InterPro:IPR010608)
245253_at	At4g15440	1.72038	1.44267		1.49398	1.5396		2.13065	1.85025	2.27381	no ontology	3.9e-07	0.000663236	0.194561	No Interaction significant Age CO2	35.1	HPL1 (HYDROPEROXIDE LYASE 1); heme binding / iron ion binding / monooxygenase
266320_at	At2g46640	1.72644	1.26404		0.890329	1.33179		2.05744	1.06103	2.16771	unknown	0.000108789	0.0835175	0.0107865	Significant Only byAge and Interaction	35.2	unknown protein
247098_at	At5g66470	1.73512	0.997988		0.53734	0.994658		1.25094	0.387397	1.24676	unknown	0.138854	0.818806	0.000846137	Significant Only by Interaction	35.2	GTP binding / RNA binding / nucleic acid binding
263488_at	At2g31840	1.74865	1.314		0.667036	1.16571		1.10823	0.422743	0.98316	unknown	0.00816009	0.134524	0.000943886	Significant Only byAge and Interaction	35.2	similar to unknown protein [Arabidopsis thaliana] (TAIR:AT4G28590.1); similar to Os05g0417200 [Oryza sativa (japonica cultivar-group)] (GB:NP_001055561.1); similar to unknown protein [Oryza sativa (japonica cultivar-group)] (GB:AAT77387.1); contains Inter
256115_at	At1g16880	1.75271	0.801204		0.547745	0.871969		1.42751	0.446116	1.5536	no ontology	0.471316	0.00192816	1.92e-08	Significant Only byCO2 and Interaction	35.1	uridylyltransferase-related
252269_at	At3g49580	1.76971	2.48296		1.86205	2.24486		1.49206	1.56992	1.34898	unknown	0.0023676	8.94e-05	0.584881	No Interaction significant Age CO2	35.2	similar to unknown protein [Arabidopsis thaliana] (TAIR:AT3G49570.1); similar to unknown protein [Brassica rapa subsp. pekinensis] (GB:AAQ92331.1)
253233_at	At4g34290	1.78262	1.13646		0.461043	1.07847		1.09066	0.282079	1.03501	no ontology	3.45e-05	0.293442	8.22e-07	Significant Only byAge and Interaction	35.1	SWIB complex BAF60b domain-containing protein
255786_at	At1g19670	1.79456	2.08689		2.22697	2.43444		1.37146	1.70192	1.59986	no ontology	0.000127107	2.45e-05	0.0944327	No Interaction significant Age CO2	35.1	ATCLH1 (CORONATINE-INDUCED PROTEIN 1)
262050_at	At1g80130	1.79822	2.00962		1.73605	1.84247		3.14207	3.03344	2.88072	unknown	1.07e-05	0.0115363	0.280602	No Interaction significant Age CO2	35.2	binding
260429_at	At1g72450	1.85794	2.17776		1.72135	2.15221		1.51878	1.40713	1.50096	unknown	3.75e-08	1.14e-09	0.0112529	Significant Only by Age and CO2 and Interaction	35.2	similar to unknown protein [Arabidopsis thaliana] (TAIR:AT1G17380.1); similar to PnFL-2 [Ipomoea nil] (GB:AAG49896.1); similar to Os07g0615200 [Oryza sativa (japonica cultivar-group)] (GB:NP_001060268.1); similar to Os03g0402800 [Oryza sativa (japonica cu
256603_at	At3g28270	1.86314	1.48994		1.27506	1.62282		1.90953	1.3068	2.07983	no ontology	5.03e-05	0.0033185	0.0714753	No Interaction significant Age CO2	35.1	similar to AT14A [Arabidopsis thaliana] (TAIR:AT3G28290.1); similar to AT14A [Arabidopsis thaliana] (TAIR:AT3G28300.1); similar to Protein of unknown function DUF677 [Medicago truncatula] (GB:ABE78510.1); contains InterPro domain Protein of unknown functi
254163_s_at	At4g24340;At4g24350	1.89054	2.18655		1.45784	1.84734		1.94257	1.49796	1.64122	no ontology	0.000306355	0.000672445	0.623704	No Interaction significant Age CO2	35.1	[AT4G24340, phosphorylase family protein];[AT4G24350, phosphorylase family protein]
266977_at	At2g39420	2.01202	2.09119		1.32012	1.43379		3.08478	2.02397	2.11503	no ontology	2.21e-07	0.000950465	0.840572	No Interaction significant Age CO2	35.1	esterase/lipase/thioesterase family protein
256601_s_at	At3g28290;At3g28300	2.08075	3.59746		3.12512	3.54964		1.709	2.56678	1.68628	no ontology	0.000124519	2.94e-05	0.0523354	No Interaction significant Age CO2	35.1	[AT3G28290, AT14A];[AT3G28300, AT14A]
246285_at	At4g36980	2.16984	0.821749		0.528632	0.879549		2.64948	0.645484	2.83583	unknown	0.000141367	0.356107	2.51e-05	Significant Only byAge and Interaction	35.2	similar to peptidyl-prolyl cis-trans isomerase cyclophilin-type family protein [Arabidopsis thaliana] (TAIR:AT4G32420.1); similar to Unknown protein [Oryza sativa (japonica cultivar-group)] (GB:AAK52566.1); similar to Os03g0395900 [Oryza sativa (japonica
260935_at	At1g45110	2.19764	1.70613		0.866142	1.26864		1.0184	0.401374	0.757257	no ontology	0.000222393	0.00316716	0.00104896	Significant Only by Age and CO2 and Interaction	35.1	tetrapyrrole methylase family protein
246884_at	At5g26220	2.60297	2.40896		1.46923	2.00287		2.12109	1.19723	1.76352	no ontology	0.000203191	7.8e-05	0.0864715	No Interaction significant Age CO2	35.1	ChaC-like family protein
259617_at	At1g47970	2.61827	1.27585		0.420465	0.977592		3.0187	0.484769	2.31301	unknown	0.00160155	0.773428	1.88e-05	Significant Only byAge and Interaction	35.2	similar to unknown protein [Arabidopsis thaliana] (TAIR:AT3G17160.1); similar to conserved hypothetical protein [Bacillus weihenstephanensis KBAB4] (GB:ZP_01184818.1); similar to Os01g0332900 [Oryza sativa (japonica cultivar-group)] (GB:NP_001042934.1)
252308_at	At3g49310	2.90397	1.12568		0.379462	1.00147		3.18124	0.415693	2.83021	unknown	0.000439039	0.896631	1.26e-06	Significant Only byAge and Interaction	35.2	similar to unknown protein [Arabidopsis thaliana] (TAIR:AT1G64650.1); similar to unknown protein [Arabidopsis thaliana] (TAIR:AT4G27720.1); similar to expressed protein [Oryza sativa (japonica cultivar-group)] (GB:ABF93637.1); similar to Os03g0114800 [Ory
260205_at	At1g70700	3.16759	2.09731		1.31337	1.97663		2.24932	0.932631	2.1199	unknown	0.000557469	0.000231217	0.00354238	Significant Only by Age and CO2 and Interaction	35.2	similar to unknown protein [Arabidopsis thaliana] (TAIR:AT1G48500.1); similar to hypothetical protein [Solanum tuberosum] (GB:BAE46411.1); contains InterPro domain ZIM; (InterPro:IPR010399)
