# Supplementary material for: Transcriptional and Metabolic Insights into the Differential Physiological Responses of Arabidopsis to Optimal and Supraoptimal Atmospheric CO2
Source: PLoS One. 2012 Aug 20;7(8):e43583. doi: 10.1371/journal.pone.0043583 (PMC3423350; doi:10.1371/journal.pone.0043583)
Supplement: Table S3 — CO2 responsive transcripts with biotic abiotic, hormone, and sugar regulation. The transcripts in Table S2 are compared to publicly available microarray data sets. (XLSX) [file pone.0043583.s003.xlsx]

## Sheet: SupplementaryTable5_biotic_Abi_
Table S3. Transcriptional response to CO2 and hormone (abscisic acid, jasmonic acid, brassinolide), sugar signalling and stress. Transcripts in Table S1B are used for comparisons to literature for hormone and stress regulation.
		Early vegetative stage (1.09 life stage)			Late vegetative stage (1.14 life stage)			Age affect on CO2 response
		CO2 levels			CO2 levels			400	1200	4000	ppm CO2
AffyID	MIPS	1200 vs 400	4000 vs 400		1200 vs 400	4000 vs 400		1.14/1.09	1.14/1.09	1.14/1.09	Life stages	Hormone regulated			Sugar regulated	Abiotic stress regulated			Biotic stress regulated
												ABA	JA	BR	Glucose	Cold	Osmatic	Salt	Phytophthora infestans	Botrytis cinerea
																24h	24h	24h			description
259058_at	At3g03470	0.71133	0.912714		1.99473	1.32672		1.82062	3.83181	2.64644		up25	up26		down20		up	up			CYP89A9 (cytochrome P450, family 87, subfamily A, polypeptide 9); oxygen binding
257939_at	At3g19930	0.803232	1.01159		0.990218	1.07573		1.0017	2.06071	1.06521			down26	up29	down20						STP4 (SUGAR TRANSPORTER 4); carbohydrate transporter/ sugar porter
260205_at	At1g70700	3.16759	2.09731		1.07248	1.97663		2.24932	0.932631	2.1199			up25		down20						similar to unknown protein [Arabidopsis thaliana] (TAIR:AT1G48500.1); similar to hypothetical protein [Solanum tuberosum] (GB:BAE46411.1); contains InterPro domain ZIM; (InterPro:IPR010399)
253666_at	At4g30270	1.10099	2.15524		0.573575	1.75474		1.23619	1.876	1.00648			up26, 28		down20		up				MERI5B (MERISTEM-5); hydrolase, acting on glycosyl bonds
257315_at	At3g30775	0.844421	1.16252		0.736567	1.59322		0.856273	2.28983	1.17351			up26		down20	down	up	down			ERD5 (EARLY RESPONSIVE TO DEHYDRATION 5, PROLINE OXIDASE); proline dehydrogenase
247280_at	At5g64260	0.955539	1.25521		1.1244	1.15396		1.41136	2.21609	1.29752			up26		down20	up	up				phosphate-responsive protein, putative
250669_at	At5g06870	1.39041	1.68796		0.538866	2.08051		0.909586	1.40748	1.12112			up26		down20	down	down	down			PGIP2 (POLYGALACTURONASE INHIBITING PROTEIN 2); protein binding
253163_at	At4g35750	0.523659	0.953068		0.899868	1.20377		0.857636	2.84192	1.08324					down20		up				Rho-GTPase-activating protein-related
264772_at	At1g22930	0.53785	0.943162		1.20178	1.00709		1.13347	3.5125	1.2103					down20		up				T-complex protein 11
248050_at	At5g56100	0.632222	0.72658		0.473926	1.10867		0.344345	0.803946	0.525427					down20	down				down	glycine-rich protein / oleosin
253647_at	At4g29950	0.659985	1.0607		0.868563	1.07521		0.921282	2.16838	0.933886					down20	up	up				microtubule-associated protein
251221_at	At3g62550	0.721816	0.486937		2.01321	0.702566		0.980306	1.29855	1.41441					down20	up	up				universal stress protein (USP) family protein
248756_at	At5g47560	0.738055	1.20199		0.825851	1.66346		0.992668	2.07948	1.37377					down20		up	up			ATSDAT/ATTDT (TONOPLAST DICARBOXYLATE TRANSPORTER); malate transporter/ sodium:dicarboxylate symporter
254247_at	At4g23260	0.77753	0.932638		2.538	0.568028		2.36703	2.23761	1.44165					down20	down	down	down			protein kinase family protein
258207_at	At3g14050	0.811174	1.14954		0.946069	1.48283		1.08754	2.73481	1.40286					down20	up	up			up	RSH2 (RELA-SPOT HOMOLOG); catalytic
248037_at	At5g55930	0.866337	0.929218		1.65917	0.767884		1.54173	2.93863	1.27405					down20	down	up				ATOPT1 (oligopeptide transporter 1); oligopeptide transporter
249174_at	At5g42900	1.03307	0.752199		2.81105	0.513484		2.11447	1.6245	1.44343					down20	up		down			similar to unknown protein [Arabidopsis thaliana] (TAIR:AT4G33980.1); similar to hypothetical protein MtrDRAFT_AC151424g24v1 [Medicago truncatula] (GB:ABE88920.1)
252563_at	At3g45970	1.18909	2.26785		0.279459	4.35461		0.633773	1.2738	1.21694					down20	up	up	up			ATEXLA1 (ARABIDOPSIS THALIANA EXPANSIN-LIKE A1)
255255_at	At4g05070	1.2224	0.9055		2.47987	1.0958		2.24552	1.08269	2.71744					down20	up					similar to wound induced protein-like [Vitis vinifera] (GB:AAO12870.1)
256548_at	At3g14770	1.29122	1.32943		0.477852	1.42651		0.635273	0.407497	0.68166					down20		down	down			nodulin MtN3 family protein
258501_at	At3g06780	1.36376	0.902715		2.01918	1.22581		1.82274	1.18485	2.47513					down20		up	up			glycine-rich protein
267523_at	At2g30600	1.4999	1.07835		0.656328	1.2278		0.707753	0.43678	0.805842					down20		up	down			BTB/POZ domain-containing protein
260656_at	At1g19380	1.7051	1.87316		1.07227	1.64851		2.00853	1.5473	1.76764					down20		up	up			similar to unknown protein [Arabidopsis thaliana] (TAIR:AT5G65650.1); similar to unknown [Vitis pseudoreticulata] (GB:ABC69762.1); contains InterPro domain Protein of unknown function DUF1195; (InterPro:IPR010608)
266327_at	At2g46680	1.04988	1.25647		1.49288	2.33981		1.87576	3.19834	3.49307		up25, 27			up20	up	up	up		up	ATHB-7 (ARABIDOPSIS THALIANA HOMEOBOX 7); transcription factor
247717_at	At5g59320	1.59182	0.981814		2.10185	2.56896		2.06363	2.26609	5.39958		up25, 27			up20		up	up			LTP3 (LIPID TRANSFER PROTEIN 3); lipid binding
263544_at	At2g21590	1.00176	1.19478		0.94979	2.37271		1.13479	2.35505	2.25357		up25			up20	up	up	up			APL4 (large subunit of AGP 4); glucose-1-phosphate adenylyltransferase
254232_at	At4g23600	1.63421	1.62099		0.739611	2.48835		1.1989	1.53261	1.84041			up25, 27, 28		up20	up	up	up		up	CORI3 (CORONATINE INDUCED 1, JASMONIC ACID RESPONSIVE 2); transaminase
259403_at	At1g17745	0.555433	1.01383		1.50051	1.09162		1.52125	4.48606	1.63799			up28		up20	down	up	up	up	up	PGDH (3-PHOSPHOGLYCERATE DEHYDROGENASE); phosphoglycerate dehydrogenase
252625_at	At3g44750	1.56636	1.38568		0.572696	1.14565		0.793574	0.324297	0.656109			up26		up20	up	down	down			HD2A (HISTONE DEACETYLASE 2A); nucleic acid binding / zinc ion binding
263483_at	At2g04030	1.4071	1.11344		0.638872	1.22582		0.711346	0.368904	0.783145				down29	up20		down				CR88 (EMBRYO DEFECTIVE 1956); ATP binding
245346_at	At4g17090	1.03613	1.49328		1.09458	1.06339		1.63451	2.07127	1.16397				up29	up20	up	down				CT-BMY (BETA-AMYLASE 8); beta-amylase
255842_at	At2g33530	0.469585	0.900623		0.996365	0.877427		0.897349	2.9566	0.874238					up20	down	down				SCPL46 (serine carboxypeptidase-like 46); serine carboxypeptidase
245401_at	At4g17670	0.58091	1.20222		1.40599	0.895664		1.6903	4.46133	1.25929					up20						senescence-associated protein-related
249134_at	At5g43150	0.602511	0.766878		1.3637	1.07338		1.04579	2.26913	1.46377					up20						similar to hypothetical protein MtrDRAFT_AC141109g4v1 [Medicago truncatula] (GB:ABE79896.1)
245575_at	At4g14760	0.638989	1.19509		0.673322	0.941898		0.804683	2.08265	0.634201					up20	down					M protein repeat-containing protein
258167_at	At3g21560	0.654159	1.30702		0.5164	1.405		0.674943	2.28204	0.725543					up20	up				up	UGT84A2; UDP-glycosyltransferase/ sinapate 1-glucosyltransferase
251593_at	At3g57660	0.676576	1.14843		0.460364	0.826159		0.528694	0.869628	0.380334					up20	up					NRPA1 (nuclear RNA polymerase A 1); DNA binding / DNA-directed RNA polymerase
255259_at	At4g05020	0.688877	1.25571		0.822894	0.974317		1.03332	2.32812	0.80176					up20	up	up	up	up	up	NDB2 (NAD(P)H DEHYDROGENASE B2); disulfide oxidoreductase
258158_at	At3g17790	0.70669	1.52966		0.787351	1.70308		1.20438	2.81149	1.34092					up20	up	up	up	up	up	ATACP5 (acid phosphatase 5); acid phosphatase/ protein serine/threonine phosphatase
252607_at	At3g44990	0.741659	0.748922		0.588784	0.625696		0.440953	0.484631	0.3684					up20	down	down		down		XTR8 (xyloglucan:xyloglucosyl transferase 8); hydrolase, acting on glycosyl bonds
267044_at	At2g34357	0.779591	1.21253		0.545637	0.816558		0.661602	1.03477	0.445545					up20		down	down			binding
262376_at	At1g72970	0.788081	0.955761		0.518945	1.01458		0.495987	0.905374	0.526511					up20	down	down	down	down	down	HTH (HOTHEAD); aldehyde-lyase
253277_at	At4g34230	0.825803	1.5905		0.771063	2.03457		1.22638	2.80137	1.56878					up20	up	up	up	up	up	CAD5 (CINNAMYL ALCOHOL DEHYDROGENASE 5); cinnamyl-alcohol dehydrogenase
250554_at	At5g07900	1.19173	1.05783		0.73785	1.05008		0.780521	0.479605	0.774799					up20		down				mitochondrial transcription termination factor family protein / mTERF family protein
261191_at	At1g32900	1.1998	1.4067		1.14027	1.49693		1.60402	2.56402	1.70691					up20	down					starch synthase, putative
264400_at	At1g61800	1.2119	2.37044		0.732049	2.31172		1.73528	3.40958	1.69229					up20	up	up	up		up	GPT2 (glucose-6-phosphate/phosphate translocator 2); antiporter/ glucose-6-phosphate transporter
261911_at	At1g80750	1.24752	1.02877		0.868975	0.986573		0.893971	0.49022	0.857307					up20	up	down				60S ribosomal protein L7 (RPL7A)
253005_at	At4g38100	1.31266	1.23093		0.597552	1.16267		0.735544	0.441583	0.694755					up20						threonine endopeptidase
258270_at	At3g15650	1.32189	1.18616		1.35301	1.35417		1.60488	2.27212	1.8322					up20	down		up			phospholipase/carboxylesterase family protein
252677_at	At3g44320	1.38716	1.36055		0.458677	2.4005		0.624054	0.738951	1.10105					up20	down					NIT3 (NITRILASE 3)
264091_at	At1g79110	1.43137	1.00942		2.07368	0.726439		2.0932	1.01139	1.5064					up20		up	up			protein binding / zinc ion binding
259908_at	At1g60850	1.4938	1.29511		0.707004	1.13841		0.915651	0.478302	0.804864					up20		down				ATRPAC42 (Arabidopsis thaliana RNA polymerase I subunit 42); DNA binding / DNA-directed RNA polymerase
253073_at	At4g37410	1.49788	3.71616		0.178828	5.6655		0.664552	2.69288	1.01315					up20	down		down			CYP81F4 (cytochrome P450, family 81, subfamily F, polypeptide 4); oxygen binding
256983_at	At3g13470	1.51428	1.16098		0.597048	1.2162		0.693162	0.309376	0.72613					up20	down	down				chaperonin, putative
252034_at	At3g52040	1.58423	1.13451		1.21023	1.08615		1.37301	0.419897	1.31449					up20	up					similar to unknown [Hyacinthus orientalis] (GB:AAS20983.1)
262050_at	At1g80130	1.79822	2.00962		1.56351	1.84247		3.14207	3.03344	2.88072					up20	up	up	up			binding
261713_at	At1g32640	1.21406	1.89501		0.62373	1.62916		1.18198	1.95364	1.01616		up27	up26, 27								ATMYC2 (JASMONATE INSENSITIVE 1); DNA binding / transcription factor
260345_at	At1g69270	0.830625	1.22245		1.23722	0.979852		1.51244	2.30235	1.2123		up27				up	up	up			RPK1 (RECEPTOR-LIKE PROTEIN KINASE 1); kinase
259570_at	At1g20440	1.08622	1.42262		1.43003	1.76182		2.0344	2.50327	2.51947		up25, 27	down28, up26			up	up	up			COR47 (cold regulated 47)
247718_at	At5g59310	1.62246	1.00113		2.60268	6.97804		2.60563	7.94659	18.1616		up25, 27	up26				up	up		up	LTP4 (LIPID TRANSFER PROTEIN 4); lipid binding
247095_at	At5g66400	0.819469	0.564148		3.48425	3.41213		1.96563	6.23746	11.8887		up25, 27				up	up	up			RAB18 (RESPONSIVE TO ABA 18)
251272_at	At3g61890	0.847393	1.04961		1.55659	2.0702		1.63381	2.95563	3.22246		up25, 27				up	up	up			ATHB-12 (ARABIDOPSIS THALIANA HOMEOBOX PROTEIN 1); transcription factor
255795_at	At2g33380	1.04423	1.49576		1.32713	1.78378		1.98507	2.74752	2.3673		up25, 27				up	up	up		up	RD20 (RESPONSIVE TO DESSICATION 20); calcium ion binding
259516_at	At1g20450	1.44567	1.64733		1.20015	1.70485		1.97705	1.82223	2.04608		up25, 27				up	up	up			ERD10/LTI45 (EARLY RESPONSIVE TO DEHYDRATION 10)
263495_at	At2g42530	0.993615	0.614174		3.51395	0.656973		2.15818	1.10056	2.30857		up25	down28			up	up	up			cold-responsive protein / cold-regulated protein (cor15b)
263157_at	At1g54100	1.10568	1.0352		1.30679	2.07745		1.3528	1.66198	2.7148		up25	up26				up	up	up	up	ALDH7B4 (ALDEHYDE DEHYDROGENASE 7B4); 3-chloroallyl aldehyde dehydrogenase
245998_at	At5g20830	0.589896	0.831967		1.47482	0.793242		1.22701	2.75917	1.16989		up25				up	up	up		up	SUS1 (SUCROSE SYNTHASE 1); UDP-glycosyltransferase/ sucrose synthase
247488_at	At5g61820	0.616175	0.793475		1.43656	1.10174		1.13987	2.13121	1.58271		up25				up	up	up		up	similar to hypothetical protein [Trifolium pratense] (GB:BAE71234.1); contains InterPro domain Stress up-regulated Nod 19; (InterPro:IPR011692)
248236_at	At5g53870	0.831545	1.24785		1.39553	2.42791		1.74142	3.32258	3.38822		up25				up	up	up			plastocyanin-like domain-containing protein
253872_at	At4g27410	0.831859	1.00514		0.981334	2.49697		0.986377	1.84399	2.45036		up25				up	up	up			RD26 (RESPONSIVE TO DESSICATION 26); transcription factor
252740_at	At3g43270	0.850215	1.50661		0.646195	1.58794		0.973563	2.4283	1.02612		up25						up			pectinesterase family protein
250279_at	At5g13200	0.925624	1.4349		1.30262	1.67931		1.86914	2.71942	2.18751		up25				up	up	up		up	GRAM domain-containing protein / ABA-responsive protein-related
266170_at	At2g39050	1.06874	1.00411		1.44016	1.38679		1.44609	2.38493	1.99721		up25					up	up		up	hydroxyproline-rich glycoprotein family protein
264953_at	At1g77120	1.09528	1.5237		1.11126	1.69741		1.69323	2.19881	1.88626		up25				up	up	up			ADH1 (ALCOHOL DEHYDROGENASE 1); alcohol dehydrogenase
252102_at	At3g50970	1.40578	2.1671		1.74661	3.77458		3.78509	6.26242	6.59273		up25				up	up	up			LTI30/XERO2 (LOW TEMPERATURE-INDUCED 30)
264636_at	At1g65490	1.21334	2.25444		0.618376	1.47319		1.39409	1.34564	0.910988			down25				down				similar to unknown protein [Arabidopsis thaliana] (TAIR:AT1G65500.1)
245265_at	At4g14400	0.672412	0.549399		3.8379	0.443415		2.10854	2.27963	1.70178			down28	up29		down					ACD6 (ACCELERATED CELL DEATH 6); protein binding
253849_at	At4g28080	0.569186	0.949192		0.553353	0.710592		0.525238	1.28972	0.393208			down28			down	down	down			binding
250260_at	At5g13810	0.715214	0.903156		1.09204	1.02788		0.986281	2.08476	1.12249			down26								glutaredoxin family protein
258321_at	At3g22840	0.738846	0.703519		1.70398	1.81593		1.19878	3.21262	3.09432			down26			up	up	up			ELIP1 (EARLY LIGHT-INDUCABLE PROTEIN); chlorophyll binding
257938_at	At3g19820	0.769802	1.07912		0.517285	0.960966		0.558213	0.893882	0.497093			down26			down	down				DWF1 (DIMINUTO 1); catalytic
261614_at	At1g49760	0.92471	1.21647		0.451284	1.01298		0.548976	0.713131	0.457144			down26				down				PAB8 (POLY(A) BINDING PROTEIN 8); RNA binding / translation initiation factor
246339_at	At3g44890	1.23889	0.870102		0.985756	0.948631		0.857709	0.469265	0.935119			down26				down	down	down		RPL9 (ribosomal protein L9); structural constituent of ribosome
261037_at	At1g17420	1.29306	1.61559		0.578396	1.85168		0.934449	1.63193	1.071			up27				up			up	LOX3 (Lipoxygenase 3); iron ion binding / lipoxygenase
259383_at	At3g16470	1.25639	2.06417		0.45758	2.14823		0.944524	1.65367	0.982986			up25, 27, 28							up	JR1 (Jacalin lectin family protein)
267123_at	At2g23560	1.48976	1.13989		0.539665	1.44417		0.61516	0.482884	0.779367			up25	up29			down				hydrolase, alpha/beta fold family protein
259609_at	At1g52410	1.0748	1.77181		0.513076	2.23887		0.909076	2.6346	1.14871			up25							up	TSA1 (TSK-ASSOCIATING PROTEIN 1); calcium ion binding / protein binding
256489_at	At1g31550	1.32941	1.56488		1.0912	1.30442		1.70759	2.02295	1.42337			up25			down	down				GDSL-motif lipase, putative
256577_at	At3g28220	1.38322	2.73516		0.199354	4.25209		0.545263	1.69748	0.84767			up25				down				meprin and TRAF homology domain-containing protein / MATH domain-containing protein
258322_at	At3g22740	1.50343	1.44447		1.47904	1.54455		2.13643	1.91883	2.28445			up25			down	up				HMT3 (Homocysteine S-methyltransferase 3); homocysteine S-methyltransferase
252114_at	At3g51450	1.63733	1.44803		1.33383	1.62086		1.93142	1.69134	2.16195			up25			down				up	strictosidine synthase family protein
250292_at	At5g13220	1.68585	2.4539		0.430382	2.42775		1.05611	1.11724	1.04486			up25							up	similar to unknown protein [Arabidopsis thaliana] (TAIR:AT5G20900.1); similar to P0482D04.10 [Oryza sativa (japonica cultivar-group)] (GB:BAB89663.1); similar to Os04g0395800 [Oryza sativa (japonica cultivar-group)] (GB:NP_001052661.1); similar to Os10g03
245253_at	At4g15440	1.72038	1.44267		1.47688	1.5396		2.13065	1.85025	2.27381			up25								HPL1 (HYDROPEROXIDE LYASE 1); heme binding / iron ion binding / monooxygenase
256603_at	At3g28270	1.86314	1.48994		1.28161	1.62282		1.90953	1.3068	2.07983			up25			down	up	up			similar to AT14A [Arabidopsis thaliana] (TAIR:AT3G28290.1); similar to AT14A [Arabidopsis thaliana] (TAIR:AT3G28300.1); similar to Protein of unknown function DUF677 [Medicago truncatula] (GB:ABE78510.1); contains InterPro domain Protein of unknown functi
263031_at	At1g24070	2.14943	1.9426		1.05362	1.79077		2.04676	1.29834	1.88678			up25			down					ATCSLA10 (Cellulose synthase-like A10); transferase, transferring glycosyl groups
265053_at	At1g52000	2.49247	3.64604		0.525505	2.97496		1.91601	1.85989	1.56336			up25			down					jacalin lectin family protein
266989_at	At2g39330	2.58357	3.00223		0.983071	2.70769		2.9514	2.52125	2.66185			up25			down	down	down		up	jacalin lectin family protein
266142_at	At2g39030	5.0373	10.151		0.208186	10.0532		2.1133	3.39674	2.09294			up25				up	up	up	up	GCN5-related N-acetyltransferase (GNAT) family protein
255786_at	At1g19670	1.79456	2.08689		0.657177	2.43444		1.37146	1.70192	1.59986			up25, 28			down	down	down		up	ATCLH1 (CORONATINE-INDUCED PROTEIN 1)
264663_at	At1g09970	0.433848	0.893689		0.767881	1.35716		0.686247	3.56993	1.04214			up28			up	up	up	up	up	leucine-rich repeat transmembrane protein kinase, putative
266371_at	At2g41410	0.74935	1.44332		1.0183	1.06721		1.46974	2.44663	1.08674			up28				up			up	calmodulin, putative
245385_at	At4g14020	0.771213	0.832695		1.38257	1.1474		1.15126	2.51675	1.58637			up28			down	up				rapid alkalinization factor (RALF) family protein
258791_at	At3g04720	1.50933	2.20561		0.879626	2.11923		1.94011	2.67432	1.86413			up28			down	up		up	up	PR4 (PATHOGENESIS-RELATED 4)
248138_at	At5g54960	0.801595	1.09003		1.22187	1.10928		1.33187	2.69552	1.35539			up28, down26			up	up		up	up	PDC2 (PYRUVATE DECARBOXYLASE-2); pyruvate decarboxylase
262230_at	At1g68560	0.662665	1.05818		0.460835	1.22863		0.487644	1.24553	0.566196			up26				down	down			ATXYL1/XYL1 (ALPHA-XYLOSIDASE 1); alpha-N-arabinofuranosidase/ hydrolase, hydrolyzing O-glycosyl compounds / xylan 1,4-beta-xylosidase
253273_at	At4g34180	0.75044	0.977184		1.34768	1.20807		1.31694	2.23687	1.6281			up26				up	up	up	up	cyclase family protein
264348_at	At1g12110	0.901843	1.19052		0.992453	0.902158		1.18154	2.27308	0.89535			up26			down					NRT1.1 (nitrate transporter 1.1); transporter
259327_at	At3g16460	1.17409	1.72506		0.403834	2.01922		0.696638	0.95298	0.815431			up26			down	down	down			jacalin lectin family protein
258434_at	At3g16770	1.24856	0.96151		2.23613	0.795528		2.15006	2.00169	1.7789			up26								ATEBP/RAP2.3 (RELATED TO AP2 3); DNA binding / protein binding / transcription factor/ transcriptional activator
259137_at	At3g10300	1.63405	1.34091		2.02588	0.954569		2.71651	0.957312	1.93384			up26			up	up	up			calcium-binding EF hand family protein
259681_at	At1g77760	0.436171	0.843905		0.839227	0.748378		0.708228	1.598	0.628059				down29		up		down			NIA1 (NITRATE REDUCTASE 1)
264936_at	At1g61140	0.543355	1.04123		0.75649	0.88533		0.787677	2.1996	0.669744				up29							EDA16 (embryo sac development arrest 16); ATP binding / DNA binding / helicase/ protein binding / zinc ion binding
254416_at	At4g21380	0.639675	0.729982		2.9332	0.473148		2.14118	2.62494	1.38784				up29							ARK3 (Arabidopsis Receptor Kinase 3); kinase
245483_at	At4g16190	0.645336	0.802214		1.53389	0.858015		1.23051	2.46996	1.3161				up29			up	up			cysteine proteinase, putative
253806_at	At4g28270	0.684051	0.772735		1.78024	0.737841		1.37565	2.32196	1.31353				up29		down	down	down		down	zinc finger (C3HC4-type RING finger) family protein
252179_at	At3g50760	0.687193	1.16885		1.39849	1.0532		1.63462	3.13799	1.47289				up29		up	up	up			GATL2 (Galacturonosyltransferase-like 2); polygalacturonate 4-alpha-galacturonosyltransferase/ transferase, transferring glycosyl groups / transferase, transferring hexosyl groups
267550_at	At2g32800	0.737311	0.830727		1.40555	1.09175		1.16763	2.15535	1.53451				up29		up	up	up			AP4.3A; ATP binding / protein kinase
253147_at	At4g35600	0.748271	0.978042		1.34768	0.954073		1.31809	2.07004	1.28579				up29		down					CONNEXIN 32; kinase
263664_at	At1g04250	0.763668	1.02277		0.441164	1.43712		0.451209	1.03042	0.634007				up29		down	down	down			AXR3 (AUXIN RESISTANT 3); transcription factor
253238_at	At4g34480	0.77145	1.07943		1.0055	0.894195		1.08536	2.21661	0.899109				up29			up	up			glycosyl hydrolase family 17 protein
267490_at	At2g19130	0.773101	1.08006		1.56915	0.924873		1.69477	2.92306	1.45126				up29							S-locus lectin protein kinase family protein
253040_at	At4g37800	0.857832	1.16932		0.395578	1.13652		0.462558	0.93471	0.449584				up29		down	down		down		xyloglucan:xyloglucosyl transferase, putative / xyloglucan endotransglycosylase, putative / endo-xyloglucan transferase, putative
255524_at	At4g02330	0.995558	2.36424		0.563818	1.38493		1.333	1.86054	0.780848				up29		up	up	up			pectinesterase family protein
264016_at	At2g21220	1.29918	3.5905		0.338371	1.79812		1.21492	0.904919	0.608432				up29		down	down				auxin-responsive protein, putative
260551_at	At2g43510	2.44854	3.44314		0.892964	3.32825		3.0746	2.41204	2.97201				up29			up		up	up	ATTI1 (ARABIDOPSIS THALIANA TRYPSIN INHIBITOR PROTEIN 1)
