# Supplementary material for: Transcriptional and Metabolic Insights into the Differential Physiological Responses of Arabidopsis to Optimal and Supraoptimal Atmospheric CO2
Source: PLoS One. 2012 Aug 20;7(8):e43583. doi: 10.1371/journal.pone.0043583 (PMC3423350; doi:10.1371/journal.pone.0043583)
Supplement: Table S4 — The raw data for transcript profiling. n = 3 biological experiments. (XLSX) [file pone.0043583.s004.xlsx]

## Sheet: MicroarrayCO2_Present_complete_
Table S4. Transcript profile (microarray) raw data. First colum is Affymetrix ID.
	Control			Elevated CO2			SE CO2			Control			Elevated CO2			SE CO2
CO2 Treatment	400 ppm			1200 ppm			4000 ppm			400 ppm			1200 ppm			4000 ppm
Developmental Stage	Early vegatative stage (1.08 leaf stage)			Early vegatative stage (1.08 leaf stage)			Early vegatative stage (1.08 leaf stage)			Late vegatative stage (1.14 leaf stage)			Late vegatative stage (1.14 leaf stage)			Late vegatative stage (1.14 leaf stage)
Biological Experiments	1	2	3	1	2	3	1	2	3	1	2	3	1	2	3	1	2	3
AFFX-BioB-5_at	264.5	322.9	452	468.6	478.1	709.4	276.7	221.3	225.2	533.6	615	823.5	250.6	289.5	418.6	727.2	604.6	710.6
AFFX-BioB-M_at	289	273.1	489	429.1	459.2	665.3	321.6	276.4	237.6	552.3	575.7	657.9	236.2	270.2	339.6	566.3	527.9	727.7
AFFX-BioB-3_at	257.3	244.4	413.2	349.1	465.2	593.6	257.4	204.9	230	453.4	450.1	629.4	224.4	221.8	290	566.2	408.5	583
AFFX-BioC-5_at	959.2	916.2	1260	1153.9	1167.6	1869.2	871	812.1	801.4	1406.5	1494.9	1747.5	800.7	851	909.6	1591.8	1455.4	1849.1
AFFX-BioC-3_at	626.9	571.6	1023.5	885.8	781.3	1296.6	596.3	572	583.7	1101.2	960.4	1235.5	538.6	551.5	657.6	1153.1	1093.2	1335.7
AFFX-BioDn-5_at	1740.6	1675	2717.9	2113.3	1843.6	3322.5	1692.8	1531.4	1599.6	2845.5	2661	3253.9	1528.5	1469.5	1765.8	2702.4	2460.6	3457.8
AFFX-BioDn-3_at	3266	2804.3	4553.4	4162.6	4005.1	5912.2	2696.7	2526.1	2745.6	5020	4823.7	5976.8	2827.7	2758.8	3194	5031.5	4348.1	6200.7
AFFX-CreX-5_at	7419.3	7269.3	12038.2	9591.7	11729.2	13211.6	7762.4	6414.9	7403.8	13376.7	11543	13074	6462.6	6990.3	7847.5	11009.9	10438.5	13375.4
AFFX-CreX-3_at	11908.2	8823.2	13555.9	16780.9	20375.9	17743.1	10517.8	9201.3	10338.5	21161.9	15408.9	17559.4	9704.6	8226.1	10764.2	15748.7	16202.3	18118.3
AFFX-r2-Ec-bioB-5_at	299.6	323.2	522.1	578.4	567.8	676.3	318	304.6	320.6	677.1	651.5	757.3	355	319.9	352	654.4	602.2	777.1
AFFX-r2-Ec-bioB-M_at	355.5	378.4	605.3	479.4	588.7	625.7	382	331.2	371.7	728.8	659.5	748.1	329.5	367.9	364.6	681.3	637.6	768.2
AFFX-r2-Ec-bioB-3_at	254.4	281.7	457.2	492.4	493.4	450.3	312	288.5	291.4	616	517.3	503.3	234.4	267.8	301.7	607.7	495.4	519.3
AFFX-r2-Ec-bioC-5_at	1191.2	1273.2	1966.7	1833.7	2066.6	1958.9	1140.5	1077.3	1132	2214.7	1941.6	1866.4	1211.6	973.8	1252.5	2024.5	1856.8	2139.6
AFFX-r2-Ec-bioC-3_at	1120.4	1281.5	2025.4	1758.6	1734.3	2395.8	1192.9	1083.2	1178.7	1948.4	1844.3	2311.5	1061.5	1176	1198.6	2182.4	1981.7	2424.8
AFFX-r2-Ec-bioD-5_at	3038	2741.5	4120.9	4385	5483.2	4178.9	2800.8	2691.8	2697.7	5853.2	4892.6	4474.6	2249.1	2482	2598.6	5267.4	5179.1	4902.9
AFFX-r2-Ec-bioD-3_at	4389.1	4080.9	5903.5	5158.9	6545.9	7193.7	3978.3	3557.8	3675.7	7329.5	6744	6656.2	4084.4	3740.2	4515	6651.4	5928.1	7780.6
AFFX-r2-P1-cre-5_at	14817.9	13456.5	20413	24035.6	25631.2	26512.6	14376.6	12351	13944.5	23849	21869.6	20801.5	13843.8	11435	16334.1	20340.9	23597.5	23808
AFFX-r2-P1-cre-3_at	16745.7	16272	25078.6	22200.7	29391.5	20332.1	16963.7	15194.9	14335.4	25681.6	24631.7	21065.4	14369.3	15101.2	16003.3	24133.5	24197.6	23355.4
AFFX-r2-At-Actin-5_s_at	5944.1	6995.4	6471.1	3919.2	4953.9	4425.6	6353.9	6357.2	6430.5	4998.9	4932.9	4802.6	5933.5	6279.7	5737.9	5047.4	5282.9	4627.3
AFFX-r2-At-Actin-M_s_at	9203.6	9534.4	8765.3	8183.3	8295	8351.8	9185.6	9221.3	9166.9	7496.3	8235.3	9140.1	10380.4	9237.8	9662.1	7630.7	7762.4	8430
AFFX-r2-At-Actin-3_s_at	12926.2	12047.4	13740.6	11374.7	13269.6	14289.3	13638	12580.9	13722.4	13463.6	12638.3	14298.6	13285.8	12737.5	14243.6	11244.6	13377.5	14726.6
AFFX-r2-At-GAPDH-5_s_at	14039.2	13499.8	12671.1	11978.7	12497.8	13528.2	15411.5	13120.2	14903.9	11961.4	12520.9	11938	15680.6	12912.2	12646.7	12980.7	13955.4	13200.9
AFFX-r2-At-GAPDH-3_s_at	15196.9	12867.7	12764.9	11485.6	12365.5	13407	15342.3	13699.9	14468.9	12232.6	12580.4	13308.4	14277.9	12442.6	11948.3	12747.2	14216.5	12737.3
AFFX-r2-At-Ubq-5_x_at	15755	13129.3	14050.1	11842.7	14938.5	11072.7	14738.6	13338.1	13932.7	14805.7	13448.5	14576.1	14948.1	15135.3	16503.4	13565.1	16325.5	15488.5
AFFX-r2-At-Ubq-3_x_at	18349.7	15856.3	17293.1	18268.5	19674.5	19030.6	16879.3	15713.1	16783.2	19150.2	18272.7	20781.1	21372	17488.4	19407.7	17118.2	18666.2	20697.2
AFFX-Athal-5SrRNA_at	94	94	188.3	113	166.9	78.7	74.3	81.8	85.6	134.2	150.1	150.1	95.6	74.8	59.8	115.5	97.7	102.8
AFFX-Athal-Actin_3_f_at	4661.3	6271.7	6411.1	6594.3	7021.7	6520.9	6678.7	5991.1	6523.6	6751.9	7029.1	6264.1	6022	6973.3	6462.5	6692.2	6828.6	7364.1
AFFX-Athal-Actin_5_r_at	601.7	857.9	496.6	478	288.1	548.9	754.2	659.1	688.7	309.1	460.2	719	855.6	802.1	1182.3	461.3	476.6	467.8
AFFX-Athal-Actin_M_at	3911.8	3898.3	4238.7	3187.5	3720.7	3329.5	4308.9	4145	4027.8	3707.9	3891.5	3860.8	3544.3	4017.3	4206	3695.9	3525.8	4180.9
AFFX-Athal-GAPDH_3_s_at	5291	5556.4	4793.9	5456.7	5833.1	5028.8	6861.4	5731	5280.4	6554.5	6327.7	5300.4	4541.6	4422.3	4104.2	6793.1	5335.5	5122.2
AFFX-Athal-GAPDH_5_s_at	4969.6	5419.5	5232.5	3963.7	4483.1	4446	5896.7	5468.6	5630.5	4170	4387.1	3824.9	5332	5520	4129	4108.2	4190.2	4188.9
AFFX-Athal-GAPDH_M_s_at	10975.1	10359.9	10563.4	10019.3	10280.1	9167.8	10788.2	10082.1	10078.4	10567.2	9967.7	11733.6	11295.5	10105.4	9724.7	9821.3	10098.3	8914
AFFX-Athal-Ubq_3_f_at	19734.3	19006.6	17982.3	13400.7	17883.3	16192.1	19501.2	17811.8	15719.6	19113.3	20362.3	17957.1	21380.2	19048.6	20782.9	17244.9	16768.7	22146.6
AFFX-Athal-Ubq_5_f_at	6858.3	5448.4	5689.1	4780.1	5833.2	4763.7	6219.8	6238.4	5783.2	5985.8	6570.1	6286	6330.1	7147.1	7707.1	6968.2	6710	7218.7
AFFX-Athal-Ubq_M_f_at	4313.9	3856.8	6634.1	2964.9	4805.1	2726.1	4607.8	4263.6	4652.9	5304.3	5105.7	4386.3	3429.1	4834.6	4344.4	6450.3	5479	3768.8
267625_at	152.1	158.3	137.1	136.6	165.2	194.1	123.6	139.9	129.3	156.1	139.4	135.2	182.6	207	108.6	208.7	110.7	146.9
267627_at	149.4	114.7	158.7	169.3	129	130.1	112	95.7	105.1	152.4	195.8	168.1	122.9	187.3	175.4	141.2	151.2	167.4
267628_at	213.5	168.7	240.3	259.7	175.7	264.9	187.9	236.4	247.8	119.8	153.3	152.7	118.4	151.3	208	153.7	172.9	143.6
267629_at	235.4	250.3	272.8	227.6	189	225.8	189.8	217.7	263.4	200.6	189.6	197.5	160.5	248.2	176.5	228	188.9	150
267630_at	1475.5	1719.9	1661.4	1955.2	2018.9	1944.6	1460.6	1603.4	1628.5	1563.5	1446.9	1586.5	1292.8	1190.4	1198.9	1570.3	1598.1	1423.7
267632_at	77.8	96.5	116.9	122.1	71.6	111	69.1	103	114.4	115	140.7	123.5	134	75.6	100.7	127.6	155.4	134.6
267635_at	6241.6	7652.5	7125.7	9194.5	9388.8	8967.4	7605.8	6537.5	6770.8	7007	6903.6	5424.3	7005.5	5983.6	4889.6	7228.6	7095.4	6640.8
267637_at	389.6	372.6	482.2	415.7	597.5	450	492.3	391.1	388.6	489.6	488.8	489.6	269.2	411	408.9	505.4	436.7	535
267638_at	4121.7	4555.7	5082.9	4856.2	5764.7	5013.4	4166.4	4227.6	4537.6	4937.1	4604.5	3882.9	4224.9	3529	3983.1	4910.8	4786.9	4480.2
267639_at	196.1	262.5	218.4	224.8	257.3	326.6	122.6	155.7	165.5	333.3	482.8	387.5	195.7	247.7	262.9	312.2	269.6	237.3
267640_at	646.4	714.3	621.5	546.7	591.6	588.5	647.8	645.8	681.2	616.9	715.8	795.9	643.7	800.9	534.1	589.9	666.6	651.8
267642_at	623.2	542.3	553.2	490.2	536.8	430.2	547.8	605.8	587.7	700.3	477.6	337.8	537.4	552.7	704.1	512.5	525.5	509
267644_s_at	487.7	481.5	607.3	441.2	392.4	359.7	428.6	375.6	432	511	444.9	375.1	368.2	352.8	411	455.1	313.2	248.1
267645_at	500.5	456.9	567.9	620	560.9	669.5	259.4	346.6	360.3	636.9	567.3	794.8	293.2	361.7	574	687.5	497.5	608.1
267596_s_at	260.8	366.3	283.3	306.4	229.2	241	362.7	334.7	387.2	295.3	437.9	410.2	495.1	403.4	644.5	353.3	403.1	494.4
267599_at	372.1	348.1	407.4	245.3	349.2	357.7	407.3	357.9	398.6	264.5	335.5	301.4	417.1	463.4	447.3	336.8	363.6	302.1
267600_at	6129.6	6738	8071.7	7769.8	8375.3	6992.5	6766.5	6394.4	5712.1	6723.2	6736.2	6798	6571.3	6645.2	5801.8	7828.4	6824.1	6551.7
267601_at	464.6	429.8	425	425.2	488.3	712.1	483.5	533.2	511.8	590	549.1	622.5	675.5	545	668.8	433.9	544.4	679.6
267602_at	243	244.3	256.4	263.1	204.2	209.1	273.5	274.3	283.1	208	260.4	259.7	287.3	325.9	300.2	238.9	274.8	312.4
267603_at	245.6	206.9	214.7	173.2	182.2	184.8	172.4	182.4	160.9	227.3	268	285.3	249.6	225.3	282.7	235.9	231.6	219.9
267605_at	1136.2	1172.4	978.5	868.9	821.1	835.3	1201.9	1346.9	1084.9	1128.1	1020.6	850.7	945.7	1086	1019.4	1055.6	981.6	844
267606_at	526	575.3	655.4	495.4	421.4	468.7	613.8	586.3	574.8	432.7	410.3	413.7	518.2	478.4	437.6	448.2	393.6	366.6
267607_s_at	1843.6	1874.5	1909.7	1170.9	1529	1360.4	2209.7	2229.3	2007.6	1951.3	2059.8	2368.7	2910.8	2924.3	2705.4	2134.2	2255.7	2116.6
267608_at	540.8	550.7	559.9	536.9	521.1	593	515.2	603.4	572.8	571	596.6	679.2	559.3	633.3	659.1	609.9	538.2	644.3
267609_at	714.3	604.8	489.1	415.6	332.3	284.9	541.5	603.9	449.9	419.8	442.9	315.4	515.1	504.9	623.3	395.6	447.6	361.7
267611_at	463	611.2	577.2	500.4	647.8	664.8	546.3	449.5	511.6	543.7	502.1	633.5	484.4	585.9	540.4	557.6	615.5	590.6
267612_at	1374.8	1502.3	1562.2	1151.2	1171.7	1043.6	1353	1538.8	1362.5	1312.5	1041.8	970.9	1332.8	1211	1219.5	1182.5	1114.7	1081.7
267616_at	267	358.6	224.3	330	207	166.5	314.7	314.7	261.8	171.5	225	184.4	297	255.3	291.7	232.4	219.6	200.7
267617_at	1953.8	2750.1	2672.2	2568.8	2447.4	2032.8	2638.4	2432.5	2274.4	2913.1	3024.4	3255.7	2319.4	2383.2	2369.9	3065	2916.5	3273.6
267619_at	722.6	747.6	712.3	532.2	438.4	540.1	735.3	700	723	501.5	561	413.6	735.1	740.9	731.9	578.3	440.8	500.2
267623_at	221	104.3	115.4	86.3	197.7	88.6	136.4	130.4	141	163	157.5	96	105.6	123.7	121.5	131.7	172.9	110.8
267624_at	436.2	398.1	384.1	345.1	383.1	363.9	426.3	467.7	471	488.5	374.5	482.5	484.1	506.5	464.7	481.4	450.9	444.6
267590_at	792.2	867.1	875.6	782.2	687.7	889.6	955.5	812.7	846.1	896.2	884.8	1155.2	1355.7	1181.3	1328.4	892.1	1006.3	1220.2
267592_at	544.4	473.6	403.7	412.8	359.2	258.9	419.6	450.3	435.2	441.1	541.5	522	550.7	456.7	519.5	363.5	392.5	405.9
267562_at	1286.3	1928.1	1827.5	2071.6	2062.5	2143.4	1753.9	1931	1794.5	1357.3	1262.5	1259.8	1149.8	1156.8	985.8	1486.7	1346.8	1048.3
267564_at	267.5	191.1	240.3	192.6	227.8	205.8	245.2	228.7	257.4	189	196.6	117.2	211	198.1	178.1	164.8	225.1	196.9
267569_at	173.9	185.3	171.9	307.9	308.3	348.1	232.3	231.3	266.5	265.5	219.8	215.2	248	190.8	175.9	301.3	293.6	260
267570_at	117.1	150.7	171.1	136.8	85.5	108.7	137.7	121.2	162.8	103	128.9	97.2	185.2	143.9	219.3	133.4	113.9	139.7
267577_at	459.7	508.1	510.2	731.2	678.5	600.5	408	499.3	440	654.6	659.2	835.2	651.5	688.4	638.3	649.9	626.1	663.6
267578_at	619.6	918.2	933	1031.1	1083.7	1033	833.1	807.1	943.1	805.2	938	718.7	564.8	697.2	538.5	983	566.6	821.5
267581_at	310	331.6	255.1	330	319	349.2	309.2	300.9	317	353.1	291.2	333.5	286.2	349.8	351.1	270.1	347.2	309.8
267583_at	523.6	416.5	379.4	344.3	262.3	353.7	417.6	398.5	384.5	262.5	299.4	350.9	461.5	485.7	565.8	268.8	261.1	244.5
267586_at	1741.5	2025	2147.3	2126.7	2337.2	2101.7	2129	2171.7	1895.6	1984.9	1950.7	1609.6	1213	1652.3	1256.1	2095.4	1715.7	1404.1
267587_at	246.6	274.2	285.2	281.6	340.6	309	227.4	257.4	192.5	266.3	218.5	234.3	236	268.1	242.3	236.2	318.4	191.6
267530_at	176.3	141.4	174.7	166.3	167.8	156.1	205.4	193.6	147	148.4	160.3	221.7	190.5	171.8	186.6	144.5	100.9	157.7
267532_at	169.2	142.9	147.3	226.8	239.7	184.5	158.6	200.5	171.3	225.5	200.9	281.1	186.7	167.8	205.7	253.9	226.7	220.5
267533_at	1123.2	1265	1001	1367.4	1288.2	1260.6	967.2	1028	1016.1	1266.2	1244	1189.1	1195.9	911.4	915.3	1284.9	1140.7	1053.7
267534_at	489.5	361.4	318.2	375.5	353.6	243	335.4	452.9	366.6	473.6	366.6	426.5	414.9	491.3	517.5	444.1	353	402
267535_at	783.4	622.9	710.8	1192.5	628.7	644.7	761.8	742.7	786.2	884.5	864.7	798.6	826.6	609	862.2	816.9	609.3	736.7
267537_at	325.4	192.5	196.6	290.1	217.4	202.1	175.5	236.4	250.6	342.1	264.9	314.7	320.8	219.9	353.5	259.9	253.4	365.9
267538_at	442.1	206	329	340.7	300	220.8	324	340.9	294.6	398.7	443.2	511.9	499.7	557.1	601	494.4	627.1	875.5
267539_at	453.4	423.8	446.8	404	470.2	372.8	480.6	470.5	448.9	449.6	465.3	368.9	371.1	346.1	443.6	458.4	355.5	371.2
267540_at	177	275.5	257.1	251	251.7	267.1	226.4	214.4	213.9	263.5	303.7	333.2	266.4	222.6	233.5	209.7	233.4	273.7
267543_at	1070	982.5	1036.2	1153.2	868.5	909.8	930.3	888.4	1029.6	917.6	875.8	945.2	923.3	983.5	940.2	884.8	631	929.8
267544_at	481.9	452.7	458.2	432.1	519.2	521.1	531.1	490.1	589.1	597.1	555.2	500.7	579	399.3	464.7	433.7	574.7	582.4
267549_at	638.7	635.2	684	818.2	748.4	635.4	467.7	576.7	502.8	573.3	698.4	474.3	434.4	615.3	506.5	570.1	501.4	401.3
267550_at	342.2	166	220.8	171.6	215.2	150.7	224.4	166.4	214.8	303.5	250.5	297.2	337	434.2	387.3	342.8	332.1	254.4
267553_s_at	1844.4	2530.5	2450.5	2593.1	3186	2124.5	2759.3	2622.1	2619.5	2186.7	2074	1308.6	1253.8	1485	1327.6	1962.9	2118.7	1525.4
267555_at	124.9	197.3	254.2	187.9	240.3	223.4	173.9	170.4	192.8	135.4	162	146.8	153.5	124.3	84.4	168.9	220.8	144.3
267556_at	1346.4	1095.8	1274.1	1017.5	1004.8	1014.5	1067.3	1300.8	1279.5	979.7	1088.3	937.1	1241.3	1153	1337.6	1003.4	787.3	848.1
267558_at	601	647.6	709.2	725.3	605.1	680.2	615.4	596.1	649.6	723.3	688.7	704.5	720.9	715.5	791.8	714.2	774.8	726.9
267561_at	629.1	528.8	502.2	522.3	381.3	518.4	538.9	560.6	661.8	504.3	482	499.4	609.8	655.5	711.1	364.6	481.2	398.1
267498_at	291.5	335.9	347.2	335.2	431.1	254.7	347.6	363.6	330.6	320.1	336.4	357.6	411.1	500.1	531.9	163.6	337.8	393.6
267500_s_at	171.6	82.5	60.4	125.3	108.8	136.5	125.5	131.9	150	252.8	258.8	443.4	270.2	283	284.7	275	303.2	433
267501_at	602.4	494.7	536.2	403.3	386.8	307.6	515.8	467.8	475.8	409.6	447.5	430.1	592.8	500.9	615.2	361.1	350	280.3
267503_at	235.3	240.4	213.9	139.3	136.1	171.2	132.9	192.2	128.5	221.9	270.1	310.8	368.4	309.6	443.3	179	219	319.7
267504_at	195.7	287.3	225.6	130	185.3	208.3	200.8	218.3	216.3	250.7	224.8	220.9	250.5	250.8	382.9	222.2	210.2	309.9
267505_at	890.8	1050.4	881.9	858.2	788.6	832	658.8	781.2	723.6	796.6	1200.8	955.4	808.8	817.3	776.9	752	642.4	680.9
267506_at	620.4	614.6	635.1	950.8	891.1	1058.9	706.4	697.1	708.3	856.6	869.4	998.3	669	829.2	573.9	961.2	945.6	935.4
267507_at	1618.9	2035.6	1842.7	2064.8	1953.4	2199	2059.2	2070.3	2255.6	1423	1583.4	1527.3	1313.5	1502.7	1283.2	1856	1731.1	1366.7
267508_at	258.8	274.9	229.7	241.4	215	278.7	258.9	276.8	259.3	266.4	217	205.1	253.8	160.5	238.9	198.2	246.1	177.3
267509_at	204.5	136.5	162.6	190.2	232.7	207.3	150	117	97	287.2	266.1	237	192.6	198.6	215.7	178.1	188.1	204.5
267510_at	1044.4	1029.1	1073.6	1160.8	1157.1	1131	1149.6	1133.7	1165.9	950.6	1275.3	1017.9	849.2	886.2	905.4	1398.4	1331.8	1149.1
267511_at	567.2	686.1	626	407.5	585.9	492.6	595.4	606.4	582.3	436.7	481.2	406	523.6	629.9	562	561.5	550.2	542.7
267512_at	316.7	150.7	250.2	201.3	236.7	155.3	157.1	158.5	124.7	240.4	247.6	236.3	149	148.8	196.2	224.4	245.6	218.8
267513_at	668.5	541.5	647.2	578	497.9	538.5	610.9	638	665	623.5	656.4	638.4	617.7	736.9	936.7	625.2	622.3	652.5
267515_at	135.5	103.4	120.1	151.4	128.8	117.2	119.7	87.3	180	134.9	124.4	109.5	150.7	92.4	137.3	107.5	149.9	89.9
267516_at	732	673.8	641	334	350.4	448.3	564.2	533.4	559.9	433.5	344.9	340.5	695.9	468.9	529.1	391.1	379.2	386.2
267517_at	1739.1	1552.6	1387.5	1648.6	1178.9	1391	1469.8	1236.5	1540.4	1455.9	1181.9	1433.8	1787.5	1135.8	1474.3	1181.2	1306.6	1112.3
267518_at	261.1	171.5	195.4	195.8	207.9	183.3	238	241.2	196.5	186.6	235.5	173.8	158.9	222.9	202	340.4	286	422.5
267520_at	353	331.9	370.3	329.7	339.7	306.7	394.2	396.7	391.9	315.6	464.5	332.9	393.5	362.6	391.2	281.5	307.4	378.9
267523_at	761.2	895.7	908.4	1323.6	1229.3	1294.8	935.1	922.6	908.6	697	563.8	554.8	541.1	597.6	541.9	890.5	808.9	529.8
267524_at	888.8	1045.4	1077.2	932.5	1147	1201.5	1173.5	1172.1	1006.5	359.1	464.1	339.4	760.7	708.3	563.5	642.1	612.6	458.1
267526_at	16314.1	15549.9	15523.3	17638	19374	17507.2	14217.3	13922.8	13437.3	15482.4	16513	16637.7	16530.4	13230.8	14963.8	13020.4	15432.4	14786.6
267492_at	3384.9	3739.5	3697.7	4374.9	4403	4456.5	2924.3	3484.9	3496.7	4475.2	3679.3	4186.6	3356.4	3348.5	3703.6	3823.6	3832.8	4368.3
267494_at	2221.5	2003.1	2153.6	2223.6	2156.3	2851.8	2197.8	2001.4	1934.9	2299.9	2239.2	2562.2	2222.8	2190.1	2250.4	2091.3	2394.5	2775.5
267496_at	449.4	259.9	235.8	208.6	291.1	329.3	340.4	386.7	426.7	282.3	329	421.9	483	409.3	453.2	359.9	385.9	421.6
267467_at	115.9	103.7	118.7	90.1	106	113.1	90.6	111.5	126.7	123.3	131.5	107.2	118.3	91.8	122.4	121.4	132.6	147.6
267468_at	255.4	224.1	183.7	152.9	203.3	226.8	247.6	213.6	224.9	261.1	253.7	291.1	240.6	259.4	312.2	185.4	248.4	271
267469_at	244.5	290.1	306.7	291.9	280.9	229.7	274.1	241.9	313.8	307.7	290.5	343.6	250	274.8	333.9	247.9	293.5	279.4
267470_at	1256.5	1189.9	999.3	1380.5	1243.5	1349.8	1458.4	1422.2	1444.4	1172.9	1272.4	1554.9	1809.3	1504.3	1504.5	1445.8	1657.4	1762.8
267471_at	2282.2	2094.3	2303.9	2125.1	2227.5	1655.4	1493.3	1791.9	1796.1	2102.8	2280.7	1860.8	1769.2	1893.7	1733.2	1601.4	1678.7	1424.4
267472_at	263.1	177	201.6	281.6	135.3	250.4	273.1	278.4	244.5	440.1	477.8	494.5	520.2	400.1	362.8	203.5	447.3	350.8
267474_at	401.1	458.1	387.5	496.4	543.6	707.4	611.4	633	597	562.8	400.5	322.7	271.2	305.1	159.6	537.7	537	335
267477_at	479.5	368.8	479.5	562.4	499.3	490.7	357.5	418.9	333.1	591.4	618.4	655.3	450.8	536.3	441.2	680.8	402.9	442.9
267481_at	167.1	145.3	178.8	238.4	256.5	191.2	179.3	196.3	173.2	183.6	264.9	170.7	154.1	200.5	183.6	185.6	205.5	212.7
267482_s_at	62.9	80.4	60.6	81.8	86.3	51.8	57.8	64.9	68.8	81.9	88.9	112.6	73.1	38.1	67.4	71	91.5	73.2
267483_at	529.8	290.3	291.7	401.3	325.3	383.7	371.3	341.7	366.2	379.5	340.9	558.4	380.2	351.4	359.5	348.6	336.2	225
267484_at	5963.7	5523.2	4991.2	5668.6	6850.8	6187.3	5022.3	5446.6	5114.6	5205.8	6467.7	5374.3	6048.7	6525.8	6548.7	5757.3	6342.4	5450.7
267486_at	1191.6	901.7	977.1	968.7	872.7	1057.7	892.9	913.1	964.3	1041.1	1099.9	1159.4	1108.5	1129.6	1341.3	929.2	1002.3	1109.8
267489_s_at	357.9	426.5	427.9	223.7	212.8	282.6	375.5	416	356	306.9	287	278.3	479.8	463.4	597.9	316.9	241.5	280.7
267490_at	370	175.2	208	182.7	209.6	190	293.9	303.6	216	373.5	464.5	438.5	426.2	673.2	602.7	304.1	389.2	487.3
267465_at	253.7	332.4	372.3	269.9	232.1	274.3	326.3	274	321.3	219.7	271.4	216.2	308.2	269.4	319.7	245.6	215.8	224.8
267442_at	441.3	428.3	515.2	442.2	496.9	463	547	545.4	595.4	474.1	732.3	563.5	495.9	508.9	499.1	521	616.8	525.5
267444_at	126.8	202.2	193.7	272.7	118.5	198.6	192.5	154.8	174.4	249.2	230.4	274.6	263.7	224.9	229.6	201.4	185.9	221.2
267446_s_at	542.1	543.8	589.1	458.9	574.9	528	734.6	846.6	712.4	441.6	382.5	330.2	460.5	579.4	508.8	498.5	429.1	365.3
267452_at	266.8	304.2	270.8	273.2	387.6	218.1	309.2	236.3	280.9	368.2	251	344.3	363.8	247.3	252.7	258.9	376	346.4
267454_at	978.5	701.7	795.6	731.7	650.7	777.9	832	882.9	926.1	838.9	856.3	892.3	878	1064.3	951.9	820.1	817.8	961.4
267456_at	499	536.2	533.1	407	356.6	242.8	437.9	466.5	310.1	621	481.5	359.1	745	454	1025.3	408.8	284.8	373.6
267459_at	2133.4	1669.1	1333.6	1278	1899.9	1274.8	1497.8	2265.8	1686.9	2297	2175.8	2228	1747.8	1588.7	2446.3	2266.5	1974.1	2761.7
267460_at	173.8	155.7	114.4	148.7	173.3	190.3	120	116	105.4	338.9	368.6	522.6	296	223.7	454.1	301.6	314.7	354.2
267461_at	663.8	438.6	525.5	552.1	595.7	537.4	396.7	331.3	298.2	2044.6	1556.7	3645	1972	1639.2	2045.7	1206.8	1126.8	2498.1
267462_at	171	143.1	100.7	103.9	128.4	178.8	100.7	121.5	124.4	135.1	127.8	124.9	105.3	103.3	73.8	141.7	114.1	103.6
267463_at	614.3	518	483.1	617.8	562.4	777.3	545.2	564.5	552.7	662.3	656	785.2	529.3	607.4	580	677.2	687.9	693.2
267435_at	10839.1	11188.4	10334.2	14963.6	12579.2	15739	10794.7	9747.7	9518.6	10487.7	10491.5	10788.5	9378.3	8661.9	7024.8	10218.2	10743.5	10428
267405_at	638.1	551.6	670.7	552.6	622.9	588	588.7	695.6	600.5	568.6	611.1	532.1	689	844.9	672.8	595.5	926.6	757.4
267406_at	167.7	172.8	201.2	157.3	141.4	150.6	255.8	198.1	212.1	133.9	127.2	133.4	200.6	194.8	137.4	174.5	137.5	126.5
267410_at	109.9	99.5	77.9	64.7	101.1	90.2	120.8	102.4	83.3	129.1	90.2	86.2	74.8	63.4	104.9	40.2	73.5	93.5
267415_at	371.8	372.3	394.3	334.8	299	437.8	306.3	457.4	441.3	282.1	263.1	353.4	361.3	365.9	314.2	344.2	284	403.5
267419_at	623.6	596.6	678.7	647.1	749.6	794.6	570.9	675.6	593.5	598.5	638.4	549.4	511.6	574.7	505.9	782.9	706.4	637.5
267421_at	1786.7	2253.1	2413.7	2738.3	2804.6	2675.7	2450.5	2503	2794.9	1382.5	1662.4	1261	1352.9	1447.4	1172.8	2060.3	1793.7	1342.3
267422_at	1481.6	1156.4	1089.6	1173.2	1044.2	956.3	1118.5	1345.6	1246.9	1390.2	1248	1563.9	2229.1	1838.8	2284.5	1234.9	1342.7	1227
267423_at	385.5	437.1	480.8	509.5	512.1	416	465.9	547.5	510.2	435	462	547.4	522.4	570.9	614.3	512.3	565.2	636.3
267425_at	331.4	226.6	225.5	334	346.2	293.3	423.1	526.4	385.7	297.6	229.5	277	514.4	826.4	504.3	502.5	545.7	461.6
267428_at	180.4	194.2	183.1	127.9	275.1	148.9	219.2	287.5	243.8	262.3	232.6	300.8	271.2	208.2	246.2	280.1	230.8	272.7
267430_at	3857.6	5603.6	5052.1	5071.8	4911.7	4960.4	4849.8	4612.8	4495.1	4264.6	5329	4200.3	4837.3	4395.2	4270.8	4562.6	4762.4	4392.4
267432_at	792.1	796.7	836.4	775.9	773.7	713.4	708.7	663.5	801.2	859	783.5	934.1	746.4	753.3	850.1	839.7	950.6	795.7
267434_at	239.9	200.8	312.1	234.5	203.7	309.8	222.1	183.3	224.7	174.7	245.6	253.4	182.6	196.5	144.1	233	156.2	213
267400_at	1396.4	965	789.5	1052.6	1077.1	1298.8	933.5	987	988.6	1568.7	1425.6	1974.5	1283	1276	1531.6	1411.8	1331.1	1801
267401_at	277.2	300.2	308.8	307.4	295	436	248.3	221.4	255.2	357.6	412.3	533	294.3	359.8	349.7	448.3	454.1	464.9
267402_at	161	260.2	251.8	250.4	232.3	166.7	207.1	191.6	275.2	232.7	173.5	210	152.4	119.8	182.4	153.9	181.1	125.2
267373_at	454.7	456	449.4	434.6	375.9	269.3	497.7	452.1	533.3	356.7	535.2	249.6	486.7	550.3	547.2	309.6	446.7	472.4
267374_at	845.9	698.6	711.9	854.5	754.5	622	859	784.7	705.9	1165	1159	1125.1	977.5	1039	1196.2	1038.2	825	1159.8
267375_at	253.7	219.8	206.1	210.1	218	191.7	218.1	231.3	243.1	269.3	257.1	263.3	304.9	343.7	360.7	262.6	255.3	290.1
267376_at	1168.8	1427.8	1301.7	1098.5	970.1	1163.1	1157.5	1258.8	1280.4	1155.1	1227.4	1245.1	1322.6	796.1	1118.1	890.3	934.3	1044.2
267377_at	2320.1	2333.8	2535.9	1965.2	1862.6	1982.4	2461.5	2427.4	2399.3	1631.2	1787.1	1604.3	2294.3	2050.9	2132.8	1729.4	1767	1761.7
267378_at	335.1	411.8	383.4	333.2	403.9	418.3	298.4	340.6	373	343	332.1	335.8	279.8	316.8	364.7	352.5	334.4	359.9
267379_at	2182.8	2080.8	1962.3	2740.6	2446.1	2764.3	1706.5	1643.7	1590.6	2245.6	2138.9	2048.4	2063.2	1543	1787.4	2098.4	2280.6	2018.2
267380_at	236.6	207.8	197	215.1	206.9	237.6	162.6	202.2	166.6	229.9	227.5	245.1	230.3	200.2	241.1	183.6	184	186.3
267381_at	669.6	241.2	247	285.9	226.4	325.1	472.7	347.2	432.5	436.5	633.3	591.8	697.5	561.4	711.8	368.1	294.1	416.4
267382_at	186.4	251.3	320.6	224.8	195.1	195.8	180.3	192.3	290.8	175.9	218.2	313.7	215.7	178.6	152.6	244	212.5	212.5
267383_at	709.4	657.6	727.5	753.3	853.5	846.9	764	683.1	684.5	915.5	858.5	842.2	810.8	859.3	873.7	867.9	992.5	1044
267387_at	199.8	182.6	227.2	206.7	190.3	213.5	196.6	176.1	220.5	183.4	178	216.7	214.8	155.8	180.4	162.1	173.7	210.4
267388_at	84.8	141.6	179.2	100.9	100.4	119	115.2	124	124.1	88.7	67.4	80.2	111.7	112.9	76.6	82.2	93.6	90
267392_at	3448.3	2965	3165.5	3438	3035	3224.5	3297.7	3291.9	3330.5	3924.6	4208	5219.2	4861.4	4978.3	5499.8	3809.2	3652.3	4813.4
267393_at	257.6	123	154.6	98.9	103	134.2	169.2	204.6	182.5	166	148.4	148.5	216.4	244	232.7	183.1	171.8	185.4
267396_at	208	291.9	275.9	285.4	284.3	383.2	281.3	316.4	292.7	254.1	223.4	259	215.7	230.1	237	262.8	236.9	318.7
267397_at	89.4	112.9	79.8	117.1	129.2	161	110.3	88.9	95.7	149.9	125.8	139.8	118.9	109.4	103.2	145.7	138.8	165.1
267365_at	511.8	575.1	377.7	702.6	334.9	587	431.5	492.5	470.7	609.7	598.4	623	664.6	618.2	672.1	650.9	626.3	806.8
267366_at	3140.1	3195.3	3377.5	2954.9	3018.5	3362.8	3077	3156	3041.5	3722.3	3908.3	3955.8	3288.5	3641.9	3671.3	3323.1	3409.7	3843.8
267367_at	2215.6	2221.5	1876.9	2547.2	2105.8	2219.7	2512.1	2397.1	2333.6	2085.9	2410.8	2305.9	3120.9	2895	2815.9	2124	2014.6	2333.6
267368_at	2735.7	2499.2	2488.6	2765	2478.3	2804.3	2965	3023.7	3088.7	2684.3	2347	2602.7	3305.9	2982.3	2899.4	2726.9	2904.6	2859.6
267369_at	122.1	125.4	113.2	157.3	106.4	109.1	38.2	109.3	99.2	156	146	161.6	159	86.4	92.4	125.3	121.1	182
267297_at	498.9	481.7	461.2	448.1	332.2	516.6	480.7	454.8	486.2	574.8	583.6	642.3	567.2	627.5	626.5	573.4	583.4	834.5
267298_at	496.8	635.2	671.1	505.8	483	710.6	628.5	560.4	617.4	444.2	503.3	570.7	604.2	666.7	683.5	531.4	505.6	643
267299_at	487.3	496.8	483.9	531.4	529.7	599.3	532.5	596.1	566.4	493.1	587.4	422.7	397.5	418.9	457.7	489.9	554.3	393.6
267300_at	871.3	220.2	205.7	359.7	304.7	328.7	499.8	478.5	541.4	581.1	539.6	666.4	665.6	715.3	498.5	666.4	629.1	705.4
267301_at	1826.7	1833.4	2098.1	1707.2	1597.2	1403.9	1730.2	1627	1733.1	1518.6	1766.9	1735	2027.3	2018	1879.9	1640.4	1545.1	1640.1
267302_at	637.8	595	619.6	625.2	594.9	659.9	476.4	532.9	503.3	627.1	564.9	562.2	662.2	511.2	539	605.6	631.9	615.1
267305_at	254	280.2	308.5	261.2	267.9	230	245.3	247.5	244.9	236.5	214.5	193.9	182.9	233.4	212.5	192.1	184.4	163
267306_at	2120.1	2098.1	1953.9	1438.1	1711.5	1600.9	2276	1946	2272	1544.3	1838.6	1451.9	2259.9	2212.4	2120.1	1634.1	1830.8	1906.8
267308_at	1393.3	1544.9	1588.6	1945.5	1566.6	1621	1482.3	1355.8	1484.4	1138.6	1106.7	1007	1040.8	1002.7	967.7	1319.2	1176.8	965.3
267274_at	361.3	454.6	498.1	368.1	302.9	432.5	431.7	434.7	375.3	291.7	288.3	265.5	449.5	256	280.7	276.7	323.8	240.7
267277_at	735.7	987.1	911.3	809.7	887.4	809.1	879.2	872.1	877.2	793.8	721.7	729.5	673.9	835.2	738	846.2	974.6	752.6
267246_at	213.4	84.7	114.8	147.9	119.8	124.1	160.4	154.8	125	197.2	216.1	342.3	219.4	249.5	276.1	319.2	215.3	308.7
267247_at	1294.1	1449.5	1402.3	1536.4	1790.4	1665.4	1135.1	1265.5	1137.5	1353.5	1756.5	1440.5	1228.1	1177.1	1147.5	1470.8	1718.9	1472.7
267251_at	2589.1	2833.4	2896.3	2873.1	2932.3	2309.1	2852.7	2793.8	2781.5	2635.5	2552.5	2102.3	2759.9	2483.3	2351.7	2423.4	2493.9	2276.5
267370_at	817.4	796	855.7	876.3	852.5	926	735.9	891.6	864.8	1057.3	994.8	823.7	918.1	779.2	970.8	840.2	990	1011.2
267371_at	99.2	146	139.4	132.6	125.8	130.6	108.8	136	88.8	139.2	115	58.8	72.4	88.6	56.9	136.2	113.4	73.1
267341_at	273.1	171.5	206.1	114.1	245.4	152.8	186.5	214	200.5	211	232.3	222.4	219.4	264.3	277.1	248.4	234.2	308.4
267342_at	579.4	474.8	533.7	763.9	601.8	582.7	513.8	517.8	680.6	687.8	603	541.6	486.1	612.8	648.3	640.2	628	698.1
267344_at	176.1	172.9	156.9	172.2	191.1	200.4	159.8	199	178.6	171.3	131.9	112.1	164.1	188.7	104.7	189.1	184.4	144.9
267346_at	383.8	382.3	332.1	300.6	301.1	259.7	340.6	480.6	443.8	370.1	442.7	399.1	385.7	486.9	408.8	320.8	399.3	392.4
267347_at	216.1	214.4	191.7	239.7	205	236.6	179.3	238	205.7	273	257.6	227.9	258.4	299.6	324.4	180.8	226.2	256.4
267348_at	1342.9	1841.7	1336.7	1558.6	771	740	1836.2	1660	1428.6	1578.3	1872	601.7	2029.6	1490.7	1904.5	1049.1	1470.2	715.4
267349_at	330.1	487.6	521.7	691.5	417.4	579.7	527.7	603.4	557.8	254.3	209	296.9	292	303.4	150.9	327.9	326.6	197.5
267351_at	146	131.4	173.6	122	105.3	118.8	119.3	117.4	149.6	115.3	123.7	168.2	150.1	106.2	140.7	97.1	97.5	63.9
267353_at	431.1	325.2	413.5	423.6	310.7	530.7	390.4	309.7	426.9	383.3	392.7	449.2	436.5	460.4	446.4	312.8	262.7	329.3
267355_at	1725.3	2250.3	2735.9	2125.7	2192.1	2581	1883.3	1865.4	1722.1	2014.8	2223.5	2605.3	1888.8	2080.8	1603.8	1885.9	1827.5	2393.7
267356_at	1002.8	1104.3	997.4	1084.7	1113.4	1071.8	880.8	887.7	931.4	1091.1	1417.8	1388.9	1163.6	1078.1	1254	1093.9	1238.8	1524
267357_at	189.8	98	53.8	60.9	104.8	97.3	83.4	87.5	71.1	204.5	117.6	218.5	105.3	158.7	211.2	179.8	154.2	161.3
267358_at	457	508.4	337.5	522	450.9	508.4	404.9	470.2	423.6	611.6	699.6	654.6	531.9	515.4	651.8	592.2	652.4	657.1
267359_at	166.5	144.8	199	174.4	224.4	254.8	130.6	159.5	144.1	195.8	165.8	177	140	167.6	119.6	138.6	219.8	210.3
267360_at	1210.8	1147.6	1082.8	1176	1137.9	1084.6	947.1	1076.1	1041.1	1151.2	1381.1	1295	1115	1021.6	1163.5	1158.5	1219.3	1412.6
267361_at	1316.1	1151.9	1227	1247.4	1178.2	1037	850.2	912.5	865.3	1804.8	1947.9	2014	1865.5	1591.1	1771.5	1431.8	1421.5	1796.3
267362_at	166.1	131.4	183.9	252.8	182.1	229.5	139.2	144.1	158.2	205.2	199.6	238.1	155.6	167.7	169.8	158.9	227.5	217.3
267363_at	580.3	503.6	588.2	664	583.6	895.9	676.5	588.5	588.8	589.7	611.7	853.9	1084.9	689.5	702.6	717.1	776.9	831.8
267364_at	611.7	613.9	662.9	425.7	451.5	674.9	357.2	396.1	336	1019.9	1342.7	1743.2	640.2	920.9	947.7	723.8	525.2	753.6
267337_at	192.1	115.1	113.8	156.7	238.5	176.6	84.1	135.4	122.7	87.5	77.5	165.7	82.5	167.5	113.5	129.8	149.7	153.4
267338_at	1740.7	2010.5	2084.7	2067.8	1659.9	1916.1	2296.5	2164.9	2078.2	1613.4	1506.7	1473.1	1799.8	1552.6	1414.9	1769	1724.2	1434.9
267339_at	306.1	394.5	335	275.9	189.9	310.1	319.9	322.2	380.4	298.6	297.1	252.9	209.9	202.1	215.3	210.9	204.5	220.6
267340_at	1943.1	1635.2	1578.5	1849.1	1794.5	1762.5	1706.7	1764.9	1781.2	2208	1636.9	2442.5	1977.2	1625.7	2009.1	1896.3	2220.5	2350.4
267310_at	882	1028.4	980.2	980.3	652.1	940.1	994.5	967.8	1084.6	802.1	777.9	828	886.4	948.5	1112.7	847.8	838.7	802.9
267312_at	1097.5	1375.8	1302.3	1537.9	1374.3	1789.4	1517.5	1349.5	1433.1	1413.5	1219.7	1173.3	1302.5	862.1	1032.7	1262	1191.5	1158.2
267314_at	129.1	113.3	208.3	128.7	119	104.5	160	166.7	121.7	151.9	104.9	99.5	95.8	137	127.4	109.4	173.6	126.8
267315_at	198.7	194.1	284.3	184.6	204.5	284.8	281.5	279.8	291.5	336.7	396.9	712.5	479.6	353.3	692.8	369	438.5	831.3
267316_at	193.4	306.8	254.4	257.2	208.4	186.8	188.6	205.9	231	170.3	114.3	198.9	145.2	165.1	187.7	129.3	184.5	156.9
267318_at	984.6	1174.8	1101.4	1059.3	849.6	1305.2	924.4	900	809.8	1038.5	1095	1446.2	886.8	1007.4	1028.4	1076	877.7	1052.9
267319_at	386.5	426.8	383.3	311.1	256.6	342.3	361.3	424.9	372.8	338	426.6	459.4	479.7	558.2	652.8	259.9	356.7	373.3
267323_at	448.6	384.5	415.4	538.5	334.8	448.6	440.3	415.2	335.2	392.5	432.6	442.3	422.9	528	408.7	344.9	431.3	429.1
267330_at	335.6	442.9	396	389	456.5	434.8	436.4	440.5	373.4	386.3	527.4	437.6	307	454.3	375.2	452.5	511.8	558.3
267331_at	126.2	113.6	126.1	84.9	118.4	105.3	89.3	119.2	167.8	79.9	97.4	113.2	101.7	64	89.8	96.2	67.2	82
267333_at	385.8	369.6	355.1	380.4	456.3	422.3	364	378.3	336.4	382.5	359.2	380.9	347.2	331.7	346.1	320.1	333.1	325.5
267335_s_at	175	124.1	139.7	234.2	225	117.3	192.1	204.4	227.5	218.1	234.6	226.4	96.4	127.8	119.9	216.1	175.2	177.9
267336_at	791.5	632.6	493.3	571.5	598.8	581.2	545.2	551	560.1	868.8	691.8	917.9	951.2	798.5	869.4	626.4	681	963.3
267309_at	298.5	441.5	494.8	393.9	347.9	601.4	457.1	465.1	604.9	285.3	349.1	334.9	302.2	240.1	236.8	403.4	410.3	384.4
267278_at	314.6	221.8	246.7	211.2	280.9	362.1	230.5	284.8	310.3	428.3	307.3	418.3	253.7	350	340.9	407.2	332	376.2
267279_at	296.9	285	314.4	199.1	264.4	207.7	252.9	287.9	250.6	276.2	238.3	283.7	291.4	280.2	337.5	232.3	259.8	305.7
267280_at	745.9	730.8	575.2	872.4	795	904.5	687.4	699.3	793.7	827.1	820.6	930.4	878	807	807.2	764.2	831.6	699.3
267290_at	284.1	294.8	299.8	316.3	201.3	328.2	261	293.1	273.3	225.9	220.9	266.2	308.1	252.5	262.2	270.8	247	278.7
267291_at	197.8	342.1	266	185.3	241.9	148.8	318	254.6	295.7	177	178.5	107.8	281.3	212.5	248	156.6	180.4	141
267293_at	1463.1	570.8	536.7	818.4	741.9	808.7	952.3	899.1	1027.8	1510.9	1210.1	1211.6	1246	1249	1193.7	1356.2	1611.2	1498.6
267294_at	4096.3	4702.6	4042.7	4555.5	5366.2	5061.4	4310	4310.3	4323.5	3850.5	3880.5	3897.1	2484.5	3706.1	3020.1	3939	3913.2	3882.1
267256_s_at	1192.4	1404.8	1338.8	1322.4	1520.8	1124.3	1579.6	1618.7	1265.6	803.2	736	478.6	984.5	1091.1	662.1	976.8	1019.3	788.6
267257_at	346	332.1	330.1	277	336.5	376	323.1	296.9	299.8	440.4	459.3	462.8	407	338.6	433.6	408.9	406.6	438.4
267258_at	216.5	202	214.9	249.8	284.1	252.7	205.7	198.7	251.4	272.6	226.4	263.2	241.2	195.7	217.2	204.8	253.7	288.5
267259_at	4301.8	3934.7	5409.9	4239.3	4542.3	4494.5	4732.3	4325.4	4437	4996.1	4719.9	5293.8	4879.7	4697.2	5613.1	4707.1	4607	5064.9
267127_at	1211.6	1553.9	1477.2	1565.5	1679.9	1711	1802.3	1729.9	1307.9	1600	1443.5	1592	1852.6	1934.1	1832.8	1694	1999.2	2200.3
267130_at	1200.9	1467.9	1320	1372.4	1347.5	1369.2	1109	1067.4	1149.7	1718	1801.2	1434.9	1014.1	1086.7	1155.5	1522.1	1368.1	1274
267132_at	391.1	517.2	417.7	315.1	366.2	361.9	326.1	405.5	339.2	381.5	413.5	461.4	425.5	456.8	594.7	415.8	423.6	390.6
267134_at	383.3	300	214.9	214.2	203.6	201.7	168	322.3	260.9	295.9	290.3	355.2	372.1	385.8	444.7	253.7	326.9	383.1
267135_at	170.7	69	164.6	173.1	213.6	177.1	176.1	179	138.3	120.9	184.7	216.4	130	194.7	177.9	213.2	215.5	180
267136_at	571.8	549.3	560	474.7	416.5	474.4	555.2	584.1	495.6	466.3	438.2	457.8	595	599.2	589	345.8	420.3	422.4
267138_s_at	2817.7	2948.8	3473.1	1590.8	1543.6	2314.1	2336.3	2909.1	3374.1	2016	2130.8	2884.9	2616.4	3523.9	2787.4	1589.4	1300.3	1198
267142_at	571.9	257.5	393	457.6	376.3	511.9	670.9	548.2	612	533.2	511.8	592.1	503.8	547.9	765.6	662.7	579.1	738.5
267144_at	173.2	152.5	136	138.4	141.2	119.3	161.3	152.4	155.1	156.9	170.1	168.2	197.1	211.6	256.5	126.7	134	166.7
267145_at	444.1	316	521.4	496.3	377.1	449.4	435.9	424	447.4	406.9	450.4	628.7	508.5	421.7	501	465.3	506.8	538.5
267088_at	5073.6	6172	6023.9	6930.9	6529.8	5583.7	4953.3	4044.5	4735.3	4449.3	4690.3	3781.8	3186.3	3709.6	3159.1	4438.7	4725.8	4215.8
267090_at	2294.6	2734.7	2398.7	2541.1	2493.3	2414.3	2464.5	2560.5	2462.2	2396.9	1895.1	1985.9	1964	1940.3	1820.4	1798.2	1916.1	1654
267092_at	985.5	1034.3	1129.2	933	773.9	1018	844.5	943.1	864.9	849.4	996.6	895.2	967.4	993.9	1070.7	794.5	720.9	802.1
267093_at	5273	3057	2430.2	4652.9	4174.8	6213.4	7304.2	7175.9	6354.9	4800.2	4642.2	4345.3	6079	6680.1	4017.4	7175.6	6473.7	4787.3
267094_at	218.9	292.2	273.2	312.3	198.7	233.4	218.9	195.1	270.8	229.7	254.8	324.8	204.5	194	213.4	169.8	236.1	230.2
267095_at	1092.2	868.7	1241	970.1	779.2	470.5	1181.3	1086	1054.2	905.7	830	684.1	1014.7	849	966.1	718.6	626.3	555.8
267096_at	140.6	122.9	118.8	167.3	157.8	175	168.1	184.1	172	161.3	155.9	226.8	112.4	163.3	130.4	268	209.4	232.6
266789_at	1519.2	1469.3	1324.9	1561.5	1394.4	1676.1	1435.6	1628	1463.1	1596.3	1677.2	1836.8	1744.6	1573.1	1568.4	1413.4	1833.6	1930
266790_at	2641.3	2496.4	2459.7	2341.9	2030.8	2646.7	2868.4	3137.5	3311.2	2464.9	2565.9	3035.3	2838.3	2883.8	2971.9	2245.4	2271.5	2573.5
266791_at	307.3	320.8	305.8	418.6	337.6	435.7	341.3	359.3	312.3	461.3	413.6	632	467.1	392.4	463.5	426.6	448.1	566.2
266792_at	273.2	283.7	284	317	289	202.3	291.9	247.6	285	272.2	293.7	300.8	285.9	251.7	286.9	245.1	320.4	368.7
266796_at	173.6	189.6	255.2	202.7	302.1	263.1	192.7	247.4	248.3	247	198.3	153.2	155.3	173.1	191.3	207	221.4	199.3
266770_at	332.4	374	360	375.4	378.2	341.8	357.5	351	378.4	331.8	289.7	333.5	275.8	217.1	227.8	260.6	338.1	259.8
267260_at	509.8	562.9	506.6	969.7	914.9	1043.2	581.1	476.1	640.2	513.3	655	476.4	220.7	208	197.9	646.6	651.6	509.2
267261_at	4760.3	5247.4	5727.7	5220.8	6355	5658.3	5526.2	6258	5152.4	6909.9	6304.4	7263.5	7528.1	7669.2	6996.1	9333.1	8485.1	8917.6
267262_at	4013	3977.5	4694.6	3412.9	2796.7	3193.8	3565.9	3457.1	3480.6	3589.8	3447	2464	2750.9	3230.1	2705.2	3550.6	3266.9	2675.6
267264_at	135.7	138.8	124	151.9	175.9	136.8	159.1	188.4	166.4	210.9	274.6	307.6	217.7	265	221.4	243.1	293.2	250.6
267265_at	382.1	477.5	485.8	639.9	750.2	658.8	341	376.8	357.6	719.7	732.1	772.1	352.5	386.6	381.1	659.7	587.8	463.2
267266_at	203.4	209.7	160.1	235.2	172	264.5	255.7	250.3	271.2	236.3	206.9	227.8	228.4	284.4	215.7	248.9	361.9	279.3
267268_at	655.1	575.4	642.9	476.7	671.1	401.8	679.1	617.3	624	534.3	705.4	700.1	483.4	618.6	731.7	591.8	718.6	581.8
267269_at	669.8	784.3	833.5	520.5	402.4	530.6	703.7	715.4	794.9	496.1	521.9	460.6	776.8	788.7	748	451.7	442.5	394.6
267239_at	2470.8	2706.3	2885.6	2359.5	2249.3	3051.9	2967.9	2640.9	2167.7	2426.7	2725.1	2758.9	2582.8	3152.2	2370.2	3088.5	2495.2	3205.3
267219_at	304.1	329.5	273.3	359.4	412.8	436.7	282.2	329.5	327.2	330.2	303.4	290.8	241.6	250.4	214.9	361.1	300.6	275.1
267220_at	1707.4	1848.8	2226	2206.8	2414.1	1500.5	1401.6	1710.2	1516.8	1748.9	1441.5	1278.9	1206.8	877.4	1012.9	1623.3	1041.5	1231.3
267221_at	100.5	154.3	203.8	164.1	135.6	105.3	128.3	130.6	157.3	127.7	105.2	127	135.4	106	123.3	109.9	139.1	91.2
267223_at	258.6	199.4	257	336.6	216.7	285.5	245.2	224.1	291.2	272	264.1	262.6	343.3	268.2	238.6	268.2	246	239.2
267229_s_at	154	130	189.5	119.2	160.9	128.3	199.5	176.7	167.8	116.6	195.6	116.9	150.9	157.9	134.5	152.6	118.2	142
267230_at	260.1	95.7	110.3	97.9	165.4	135.3	94.3	148.1	117.9	163.1	102	131.2	155.9	138.2	282.2	177.1	163.7	161.4
267232_at	72.7	77	133.9	89.3	80.6	88.8	58.5	88.6	98.6	75.9	51.6	66.6	58	49.6	68.7	50.4	62.8	45.2
267233_s_at	1758.1	3017.2	2776.9	2539.5	3172.8	1785.6	2754.2	2615.5	2422.7	3000.5	2851.3	2421.7	2431.8	2394.9	3121.1	2727.3	2392.4	2645.1
267235_at	414.8	297.7	218.2	234.9	291.4	273.9	310	338.3	296.8	419.7	322.8	523.3	363	250.8	310.4	338.7	291.2	298.4
267236_at	3311.9	3249.9	2208.8	3118.5	2873.6	2192.1	2721	3134.6	2998	3228	3468.6	3142	3642.1	3455.9	3770.4	3660.6	3310.8	2978.2
267237_s_at	523.7	869.6	613.7	692.9	673.7	625.8	694.2	797.6	666.3	373	406.4	278.7	389.8	264.8	195.6	567.3	474.6	263.9
267238_at	291.9	262.1	262.1	219.9	274.8	224.8	248.7	241	269.8	253.9	199.7	189.9	303.1	193.4	257.5	237.6	156.3	196.4
267211_at	958.8	780.1	841	901.5	975.1	1043.7	1052.5	819.9	1022.4	789.4	858.5	740.2	798.4	934.9	754.1	899.1	800.3	719.1
267212_at	3932.5	3069.9	2810	3132	3023.4	3377.6	3456.1	3476.1	3487.7	3513.7	3657.5	3849.6	3605.2	3883.3	3977.6	3373.3	4029.1	4197.5
267213_at	6762.8	7061.1	7838.4	10708.4	9611.7	8880.8	7896.1	7196	7785	7770.2	6799.2	6248.9	5167.6	4661.3	3751.9	7938	7067.7	6073.1
267214_at	2409	1848.1	1969.7	2592.2	2367.2	2692.2	1908.9	1914.7	1968.6	2830.5	2596.2	2631.3	1675.8	2441.7	2174.2	2631.9	2180.3	2677.5
267183_at	227.5	290	304	192	227.6	157.2	272.8	279.8	244.3	191.2	179.4	165.9	212.2	198.6	218.3	210.7	191.6	133.3
267184_at	272.3	345.2	359.5	364	348.8	329.2	276.8	298.2	304	395.7	272.1	476.6	332.6	373.8	308.4	337.7	330.4	345.5
267185_at	684.8	660.2	714.5	730.6	606.8	745.7	700.5	699.4	654.8	701.2	684.9	723.8	500.7	535.2	607.1	663.7	598.7	549.7
267186_at	394.3	480	483.6	322.9	307.2	265.4	418.3	400.4	421.4	348.8	254.9	331.6	421.5	488.1	366	267	395	352.6
267187_s_at	1956.1	2252.4	2296.1	2325.6	2743.6	1975	2250.7	2219.4	2244.8	2324.8	2249.1	1688	1957.5	1865.5	1880.7	2093.5	2547.6	2163.3
267188_at	1743.7	2486	2350.6	2794.8	2597.8	3148.1	2453	2407.6	2727.4	2408.5	2298.7	2295.2	1635.6	1797.1	1655.9	2675.1	2183.2	2444.6
267189_at	1250	541.9	591.7	569	585.8	570.5	647.6	740.2	728.7	1294.7	1027.9	932.7	1040.2	1018.5	1291.4	820.1	1002.7	746.2
267192_at	184.4	201	222.2	189.4	164.8	126.8	182	152.3	171.1	198.2	207.1	200.4	95.6	139.2	129	151.7	155.1	110.9
267194_s_at	190.3	328.4	220.4	213.6	289.1	228.6	198.4	234.7	225	258.1	295.2	177.6	235.3	211.9	224.3	321.7	399.9	279.1
267196_at	14147.1	12890.2	14401.2	10603.1	11822.6	10854.4	12925.2	11278	10617.9	10966.5	11422.7	10959.1	10636.5	11380.2	14213.5	8780.7	10148.6	10298.7
267199_at	374.3	406.3	415.7	475.9	453.1	432.5	525.8	530.6	466	512.9	463	499.5	386	540.7	526.9	519.4	500.1	626.9
267201_at	117.2	130.4	129.4	175	147.3	174	135.6	164.7	100.4	140.2	115.9	106.4	103.4	108.4	119.8	163.4	163.7	119.2
267208_at	1121.8	1278.1	1068.7	1216.9	1322.8	1164	1157.9	1064.4	1192.1	1216.9	1217.2	1227.7	1404.2	1160.9	1212.2	1150.9	1069.9	1219.5
267209_at	450	415.7	495	402.4	409.1	487.6	460.6	515.4	605.6	511.8	465.3	600.9	748.3	712.1	813	503.5	599.9	793.6
267210_at	222.7	241.2	218	238.9	255.2	233.8	168.2	159.5	199.2	196.5	215.5	182.1	244.5	190.7	200.7	219	258.3	210.3
267151_at	3028.1	2984.6	3017	2794.5	3290.1	2953.3	3787.4	3616.9	3871.3	2384.7	2346	1663.5	2701.7	2590.1	2323.9	2329.8	2605.8	1774.1
267152_at	4663.8	5643.8	5498.7	6137.4	7422.8	6215.7	4064.8	3878.8	3886.2	6664.7	7021.7	7216.5	4412.9	5315.5	5136.9	5925.5	5131	6662.3
267153_at	24374	23346.7	25856.6	27610.2	28179.1	28735.2	24867.4	21573.7	22675.1	30982.6	28217.6	32272.8	29196.1	23875.5	25454.1	26049.4	26672	31105.2
267154_at	6910.4	5936.1	5960.6	7299.4	8106.1	7845.2	8428	7737	7920.2	9307.4	9433.7	8430.1	10766.1	11039.3	11951.1	11279.6	11449.6	14822.7
267157_at	466.7	594.6	592.8	583.5	482.6	465	560.2	540.5	737.6	559.8	590.9	505.7	499	530	455.9	455.7	445.4	435.8
267158_at	568.6	619.6	535.2	393.9	403.3	544.8	555.3	591.3	452.3	448.9	490	540.8	527.7	591.6	488.7	462.2	492.1	611.5
267161_at	374.5	381.3	321	335.9	348.1	381	337.4	363.4	312.5	425	365.6	555.6	294.8	381.3	303.7	461.9	425	430.2
267162_s_at	294.6	370.7	263.6	446.3	329.4	340.4	449.3	507.1	526.1	219.8	267.7	198.7	158.8	228.7	204.1	319.3	243.8	255.8
267163_at	252	234.3	196.7	281.3	185.9	249.6	268.5	263.5	278.2	233.7	254.2	307.8	278.4	312.8	271.2	190.2	239.7	194.4
267165_at	2279.5	991.3	965.3	612.7	721.2	842.2	1209.7	1204.6	1400.1	1526	1756.8	2134	2176	2972.4	3267	1185.6	1258.3	2080.2
267169_at	1013.4	927.7	788	972	753.2	848.8	897.1	907.5	855.6	1363.5	1434.5	1374.4	1134.9	1025.6	1120.5	976.1	880.1	903.5
267170_at	214.9	236.5	234.5	286.8	327.4	342.9	203.5	227	243.8	282	278.5	386.9	328.5	229	236.3	287.8	271.6	281.9
267172_at	11715.9	12565.6	12354.4	14551.1	13967.6	11633.5	10812.4	11103.2	10790.3	11262.2	12198.1	10687.7	9741.9	8222.9	7303.7	11428.6	12170.3	7722.4
267173_at	190.7	215.4	182.9	186.7	182.6	229.1	214.9	195	196.1	146.7	167.8	153.3	148.2	163.3	164.6	117.6	169.8	115.9
267174_at	891.9	1180.9	1324.5	1297.5	1345.7	1259.9	1389.5	1371.3	1349	979.5	1006.7	775.5	607.2	739.9	630.6	1387.6	1101.9	844.7
267175_s_at	968.8	1098.5	1081.4	1108.4	1115.8	1008.1	1200.9	1221.7	1355.7	889.4	774	647	901.6	929.1	826.5	1052.1	1011	878.4
267177_at	157.2	147.7	126.8	196.5	171.1	160.3	186.6	161	202.3	179.4	219.6	241.7	177.4	256.1	291.2	199.5	178.1	225.9
267179_at	308.7	428.4	353.2	337.3	495.4	371.8	425.9	432.7	421	391.1	408.4	394.2	333.1	484.8	461.3	499.6	406.7	501.5
267180_at	510.4	459.2	483.3	456	380.1	440.3	535.9	476.9	520.3	453.7	456.7	541.8	595.6	645.5	579.7	431.1	428.8	498.7
267181_at	645.5	530.8	473.2	550.2	537.2	404.2	662.5	661.1	640.2	614.6	624.1	629.5	568	700.5	384.8	792.5	1054.1	756.5
267182_at	148.9	134.7	157.7	157.2	116	125.6	132.7	153.4	111	81.3	138.1	143.8	82.8	135.3	128.7	121.8	65	116.4
267123_at	186.2	254.8	276.7	339.2	307.8	422.2	226.9	295.2	296	170.6	140.3	130.6	163.4	190.7	162.2	181.6	249.1	206.9
267126_s_at	3849.9	3637.3	4740.2	6054.9	6753.3	4557.4	3385.8	3714.5	3085.7	7356.9	5782.1	4580.7	3181.6	3444	3876	6883.7	6409.9	5077.5
267099_at	189.1	208.6	177.1	186.7	231.6	192	192.7	163.4	173.3	252.2	223.9	302.1	218.5	214.8	190.6	247.5	191.2	228.7
267102_at	320.1	403.7	308.3	350.1	250.3	388.4	356.8	419.4	389	331.8	307.6	295.9	299.6	304.8	348.1	296.2	271.1	384.2
267103_at	378.3	228	252.2	359.7	341.7	256.4	269.7	306.6	365.1	375.6	340.5	435.5	390.3	378.4	253.6	261.4	279.2	271.6
267104_at	7414	5293.1	6173.1	5715.9	6728.6	5403.3	5923.1	6158.9	5540.8	8295.3	7566.9	8737.6	8420.9	7815.1	9400.6	7736.5	8058	9033.2
267106_s_at	1749.1	1366.3	1108.6	1442.2	1341.1	1006.6	1296.4	1322.5	1387.3	1643.6	1842.8	1456.5	1687.5	1915.3	1295.1	1928.1	2118	1156.8
267112_at	2588.4	2366.9	2665	2693.1	2891.9	2486.3	2817.5	2901.4	3185.4	3208.4	2863.2	2858.5	3134.8	3058.2	3564.3	2955.2	3373.6	4039.8
267113_at	136.2	256.1	201.7	170.5	217.1	124.2	223	159.2	179.9	134.9	155.4	202.5	153.8	165.1	183.7	157	118.8	185.1
267114_at	463	460	540.3	454.9	362.9	445.9	469.7	582.7	506	396.7	559.4	488.4	510.8	644.8	607.9	471.4	466.5	544.7
267115_s_at	178.7	332.9	241.2	345	436.5	383.5	286.5	251.7	203.4	290.4	299	202.3	101	174.3	180.4	328.4	243.9	161.8
267116_at	799.5	661.1	565.1	623.4	599.8	696.7	736.2	713.3	705.4	490.6	513.7	691.8	921.8	924.1	701.4	583.9	573.5	670.6
267057_at	1287.3	1476.1	1288	1612.9	1605.4	1495.8	1053.1	1113.8	1052.8	1503.5	1538.4	1298.8	1064.7	1033.3	1009.5	1290.6	1282.2	1172.1
267059_at	1703.7	1373.3	1337.9	1960.5	1760.7	1805.8	1842.4	1817.3	1939.6	1987.1	1640.5	2187.5	2242.9	1794.7	1731.1	1933.2	2227	2098.1
267060_at	1019.2	1085.2	1035.7	1132.8	1265.2	1224.5	1106.4	1230.7	1196.9	1185.8	1245.4	1421.1	1457.1	1413.9	1481.2	1447.1	1519	1671.6
267061_at	2681.5	2743.9	1709.6	2909.7	3363.1	1657.4	2764.4	2577.2	2011.7	3154.3	3081.8	2166.7	2893	2369.4	2792.8	2675.9	2070	1945
267062_at	395.5	454.5	385.7	552.3	590	369.2	404.2	516.1	451.9	422.2	538.8	466.5	415.7	406.7	493.6	541.2	497.5	407.2
267063_at	362.6	368.7	375.7	359.1	425.5	309.9	370.1	264.2	235.5	393.4	405.6	319.7	262.8	272.6	239.2	366.3	312.9	299.6
267064_at	717.4	540.4	483.9	582.1	589.8	637.3	838.7	738.4	807.8	662.2	664	661.1	617.7	687	689	1013.6	863	725.4
267065_at	158.7	166.4	144.9	142.1	153	176.7	156	159	177.3	148.5	185.9	155.1	160.5	182.3	197.9	120.8	129.3	139.7
267066_at	361.4	247.1	327.3	375.5	410	340.5	254	222.9	246.8	521.4	519.1	459	227.1	403.1	421.4	356.1	266.3	449.6
267068_at	137.9	137.5	117.2	112.4	113.3	159.4	91.6	85.1	144.6	87.4	130.6	105.1	107.2	121.7	90.7	109.7	100.9	115.8
267071_at	309.3	320.1	306.5	291.9	290.8	308.6	325.7	311.6	389.9	290.2	244.5	369.9	337.2	286.2	350.3	191.1	218.8	295.6
267073_at	324.2	228.9	263.3	319.4	319.4	323.3	354.9	293.6	254	351.8	387.6	316.7	285.3	359.5	378.1	345.8	434.1	392.5
267076_at	21431.6	11861.5	10340.5	12381.8	15635.3	10178.7	9160.8	7932.4	10209.7	24798.2	19124.2	19116.5	15790.4	13220.4	20183.3	13758.7	12562.4	15870.1
267077_at	140	137.8	124.2	97.7	115.1	131.7	113.4	171.5	84.1	146.4	112.8	167.7	254.9	155.1	193.2	162.6	185.8	232.8
267078_at	223.7	344.3	233.9	434.8	350.6	378.5	266.9	312.6	273	250.6	364.9	280.2	251.8	304.1	241.3	398.2	300.5	355.9
267079_at	157.9	166.4	175.8	184.5	174.7	174.6	156.7	131	137.9	167.2	166.6	223	205.5	112.2	142.9	216.5	117.3	206.5
267080_at	185.4	183.9	177.2	202.2	194.6	160.2	112.8	195.3	137	217.1	258.3	308.2	830.9	764.2	330.2	570.2	1354.8	693.6
267082_at	455.1	437.6	513.9	296.3	373.4	389.2	481.6	481	563.3	424.5	401	535.4	480.7	481.3	720.6	294.4	479.4	368.4
267083_at	5374.7	971.4	882.4	1675.6	1460.2	2030.6	2958.7	2488.9	2718.1	3566.2	3156.4	4745.9	4333.8	4026.9	4518.5	4201.8	3129.4	3611.8
267084_at	1175	860.7	681.3	1024.8	1320	1005.1	1046.7	1124.7	1191.7	1472.6	1306.3	1346.7	1380.6	1517.6	2010.1	1332.4	1716.5	2359.7
267050_at	204.8	154.1	88.8	104	147	97.8	138.3	160.8	125.4	190.8	154.1	155.1	148.1	133.4	180.7	161.1	142.9	150.2
267052_at	248.7	206.3	286.3	218.8	180.3	260.5	179.9	212.5	245.1	229.2	227.1	383	174.6	275.8	174.9	230.7	221.8	234
267055_at	982.1	626.5	640	958.7	817.2	765.4	719.2	766.8	740.3	845.4	878.4	663.3	817.5	899	803.6	746.2	774.9	905.9
267027_at	734.8	867.2	709.7	923.7	893.4	1129.7	551.4	654.1	633	574.8	914.3	875.6	579.4	708.1	657.3	788.9	935	797.6
267029_at	334.5	524.7	376.4	512.1	438.5	407.3	293.1	307.1	278.3	424.1	385.6	503.3	338	327.2	412.8	368.8	354.2	309.9
267030_at	718.5	640.9	718.2	646.3	510.6	592.2	566.6	651.6	660.9	488.8	478.3	553.2	700.9	772.1	783.8	436	490.1	478.1
267033_at	803.3	981.5	1294.7	663.4	877.5	919.2	1125.9	995.2	1053.1	789.9	730.8	708.5	858.6	711.6	943	760.2	921.6	788
267034_at	1575.5	1140.2	1009.3	1467.4	1364.7	1368.1	1713.6	1630	1556.8	1164.1	932	1078.4	1298.4	1366.1	1601.4	1172.4	985.3	1309.4
267035_at	207.5	177.1	173.9	325.1	189.7	215.6	184.5	187.9	257.4	280.2	225.7	302	296.9	347	313.6	368.9	276.6	334.2
267036_at	146.8	184.3	167.6	167.7	215.7	121.3	106.2	106.9	143	372.3	303.7	283.1	230.5	173.9	306.8	362.5	217	264.1
267038_at	150.8	179.9	142.8	171.9	155.4	216.2	151.7	185.9	187.2	156.7	153.3	114	128.3	159.9	158.1	162.5	170.7	173.3
267040_at	549.7	436.5	505.9	442.6	522.5	478.3	553.6	639.6	597.9	596.6	519.9	491.3	568.6	690.9	612.1	559.8	569.3	625.1
267044_at	280	383.1	403.1	252.7	263.4	315.1	363.7	488.6	440.5	238	275	192.4	232.3	360.6	267.2	242.5	183	150.5
267048_at	101.3	134.6	152.3	134	152.4	83.1	141.5	132.6	121.4	156.8	175.5	172	95.5	161	120.6	182.5	145	186.1
267023_at	3294.3	2668.6	2658.9	2984.9	2314.8	2788.5	2855.2	2757.2	2944	2743.4	2606.2	3163.2	2865.9	2929.3	2634.9	2609.7	2390.7	2619.1
266996_at	221.2	263.2	294.6	189.3	178.5	145.7	259.7	350.7	290.2	177.3	175.4	150.6	290.6	229.3	251.7	160.8	172.3	123.6
266997_at	264.8	206	178.4	130.5	130.2	203.2	193.6	252.1	247.9	201.1	146	159.7	241.8	183.5	309	133.1	228.7	184.6
267000_at	956.3	924.9	1076.8	904	1067.2	1051.5	922.3	871.9	855	1088	1047.7	1027.3	981.7	1154.8	961.7	1038.1	1237.2	1212.5
267001_at	1625.4	1441.4	1691.8	1347.3	1406.7	1206.9	1166.6	1280.3	1319.6	1873	1823.6	1992	1953.7	1685.2	2311.4	1478.3	1656.3	1768.5
267002_s_at	35173.1	33070.9	38757.2	36384.7	41025	40745.6	32211.7	28138.8	29168.4	38628.4	38563.1	41005.3	34595.7	27767	32366	34386.9	29516.5	35587.2
267004_at	553.4	566.7	543.8	980.6	750.6	808.2	668	645.4	744.7	605.7	559.3	553.2	510.4	438.5	407.1	676.2	565.4	618.9
267005_at	3759.8	3127.3	3175.8	3545.5	3359	3292.2	2974.8	2893.8	2763.8	3546.7	2960.3	3304.5	2766.8	2354.9	2669.7	2891.9	2935.1	2922.1
267006_at	196	185.4	255.4	211.7	129.5	174.4	132.1	202.6	182.3	100.2	146.8	146.8	168.2	74.7	125.7	133.6	129.8	116.7
267007_at	13765.5	15118.9	16725.9	16707.3	13121.4	16567.7	16242.6	13655.8	16522.8	13141.5	11028.5	10840.4	12965.1	10694.5	9952.9	12162	11192.3	10291.3
267009_at	293	228.4	213.1	170.7	158	156.8	186.4	213.3	277.6	159.9	168.1	108.2	197.5	158.7	284.9	104.2	155.4	116.2
267010_at	152.6	175.8	194.1	224.6	262.3	212.5	165.1	171.5	190.7	257	201.4	132.2	169.3	147.5	132.7	226.7	204.7	157.5
267012_at	377.3	361.3	333.3	292.4	274.7	351.6	334.1	429.6	297.4	366.8	362.2	300.7	409.2	468.7	360	366	437.6	468.7
267014_at	398	377.7	334.7	321.6	327.9	322	317.7	306.9	324.2	461.6	414.4	424.4	270	370.3	356.6	457	460.4	519.9
267015_at	373.3	428.1	391.9	333.4	302.4	362.4	370.7	392.6	372.6	394.8	349.3	344.1	448.5	428.7	440.2	380.3	322.3	327.7
267017_at	152.4	178.4	197	221.4	248.6	363.1	192.7	254.5	155.2	217.9	219.5	179.9	71.9	135.8	92.3	364.9	260.6	257.5
267018_at	736.6	981.1	741.4	1415.3	830.7	916.1	859.2	871.1	877.1	618.8	688.9	593.5	689.8	674.8	614.5	771.8	617.6	471.5
267019_at	308.6	351.8	371.3	413.7	458.9	452.8	421	458.6	453	409.1	308.4	322.6	287.3	305.8	183.3	399.6	299.2	324.6
266989_at	244.2	153.7	141.2	472.6	490.5	429.7	504.4	635.8	478.3	554.7	485.8	550.6	1146.8	1397.3	967.5	1148.6	1553.6	1606
266990_at	768.3	1001.6	886.4	553	830.6	781	759.7	685.5	740.6	621	706.4	638.8	630.9	779.4	615.6	593.3	676.8	593.3
266991_at	814.7	851.7	823.9	1112.3	867.5	772.8	947.3	814.7	869.3	932.2	995.5	969.6	813.7	879.6	794.5	887.5	1038.9	879.5
266993_at	804.7	172	138.1	265.6	270.7	224.5	478.2	363.8	404.5	503.9	409.3	535.6	775.8	801	748.4	471.3	349.2	371.8
266963_at	687.6	822.8	922.2	628.2	668.8	664.9	651.4	690.7	621.6	725.6	842	1105.2	803.6	747.3	840.1	663.1	739	877
266964_at	317.4	277.1	294	221.1	206.9	246.8	292.7	292.2	314.9	203.9	279.7	233	310.5	341	414.7	235.3	239.4	256
266968_at	196.5	147.7	107.4	149.8	158.2	157.8	240.1	178.9	207.2	127.3	198.9	164.5	143.7	230.2	171.9	183.6	149.9	157.5
266971_at	248.2	244.3	243.6	176.1	110.4	160.5	221.7	239.7	198.2	190.6	193	266.8	255.4	203.3	249.5	211.5	176.2	210.3
266977_at	312.9	139.7	171.4	360.8	436.5	458.2	456.2	464.9	383.8	651.2	483.8	789.9	829.3	965.6	746.2	955.6	904.9	899.4
266979_at	2720.7	3210.4	3600.2	3571.2	3615.1	3041.2	2463.4	2305.1	2029.3	3348.8	3333.7	3149	2727	2512.3	2422.1	2725.5	2846	2682.7
266980_at	1991.7	2633.1	2913.6	2637.7	2791.2	2522.6	2818.7	2889.5	2965.2	1829.4	1817.6	1367.8	1368.8	1447.3	1339.9	2458	2168.3	1424
266981_at	6199.6	8397.2	9508	8730.3	7625.4	9812.3	8621.7	8232.6	8500.7	6507.9	6908.4	5805.9	4094.3	4731.7	4227.5	7724.6	6006.5	5487.6
266982_at	123.4	193.4	298.5	142.3	250	173.4	147.7	212.3	187.7	193.2	151.9	123.3	128.4	172.5	127.5	253.9	166.7	166.2
266983_at	283.4	178.9	140.6	217.6	212.3	238.8	171.1	146.9	185.3	225.4	317.5	459.1	261.4	320.8	260.2	316.8	402.4	345.3
266984_at	542.6	573.9	564.2	696.7	559.4	458.4	475.6	453.1	453.2	604.4	560.6	616	533.1	551.2	552.9	475.7	547.7	578
266985_at	316.2	257.1	252.1	286.1	264.1	283.1	252	184.2	244.8	291.6	312.7	373.8	291.8	341.6	306.1	301.9	305.2	341.9
266986_at	359.8	275.7	326.8	406.6	411	332.4	269.2	276.5	428.5	468	422.1	421.5	289.6	408.7	399.5	399.5	365.2	487
266959_at	242.1	294.3	316.2	258.7	269.2	187	266.9	282.5	270.5	199.3	200.4	173.6	165.8	199.7	153.5	142.1	188.6	150.7
266934_at	308.4	478.1	361.9	494.5	342.5	403.5	414.6	454.3	468.6	271.5	237.5	133	194.9	212.7	212.9	325	278.4	257
266938_at	487.9	566.2	421.7	671.1	551.3	697.7	489.1	462.9	438.6	488.3	574.2	751.3	398.3	498.5	569.1	590.2	641.7	770.6
266939_at	8772.6	8026.4	8526.1	6391	6306.6	6815.3	8295.7	7694.4	7969.8	6664	6458.4	7351	8242.7	8759.1	8519.5	5581.9	6312.1	6306.4
266942_at	412.5	386.2	450.5	458.5	441.9	441.7	456.2	458	440.8	363.6	320.1	289.6	417.7	363.2	289.5	324.6	296.1	345.5
266946_at	319.3	365.2	368.7	402.7	372.3	413.6	361.1	340.3	297.1	227	354.5	373.6	425	307.5	358.9	249.5	280.7	288.2
266948_at	216.7	174.2	237.1	245.3	240.7	174.3	193	201.8	156.1	209.5	228.5	206.1	197	135.1	183.1	224.1	208	162.5
266949_s_at	806.7	667.6	596.3	422.9	446.2	548.6	694.4	746.7	694.8	599.7	621.7	499.2	820.6	769.7	706.8	575.1	733.7	472.9
266950_at	478.8	520.1	567.8	594.5	566.6	717.1	547.2	545.7	565.2	515.7	567.1	670.3	584.8	662	679.4	557.6	585	770.8
266951_at	488.4	501.9	512.9	703.3	487.8	704.2	630.8	599.5	644.5	414.9	609.6	504.5	423.1	567.3	434	528.8	429.5	319.3
266955_at	1097	1384.5	1286.6	1093.7	1232	1440.9	1379.6	1454.8	1401.6	986.4	1114.8	985.3	1180.6	938.9	920.9	1144.6	1025.3	792.2
266956_at	1277.5	1194.6	1171.9	1105.6	977.3	1063.3	1314.8	1414	1277	769.4	767.2	642.9	1025	1101.3	1034.2	909.3	843.2	763.1
266957_at	837.7	1146.6	1262.3	1614.1	1205.2	1434.4	1095.6	1224.5	1232.7	938.4	892.2	598.9	579.3	642.4	529.8	1115.6	717	583.8
266958_at	647.5	570.2	550.6	564	587.2	794.8	565.9	617.7	633.7	552.9	654.9	612.7	570.3	564.9	604	507.5	628.1	487.8
266899_at	2024.9	2198.6	2290.6	2318.6	2282.7	2201.5	1883.4	1895.4	1569.9	1481.1	1415.2	1355.8	1798	1776.5	1361.5	1577.1	1702.6	1600.7
266903_at	329.3	381.1	344.3	429.5	392.5	363.6	360.3	410.5	422.5	343.6	267.9	224.1	243.2	248.9	227.4	312	276.1	308.8
266904_at	1924.2	2424.8	2068.3	2383	2532.1	2375.4	1902.6	2279.9	2443	2047.8	2061.7	1985.1	2010.7	1928.6	1720.2	2252.9	2215.6	1707.8
266905_at	1034.6	1510.3	1666.9	1154	1471.3	1527.4	1435.2	1473.1	1343.4	904.9	1062.1	1176.4	1103.3	1231.4	1250.7	1011.8	1143.3	1292.3
266906_at	1780.1	1666.4	1861.9	1417.8	1628.4	1411.2	1733.2	1876.9	1692.5	1578.1	1814.1	1913.9	2032.9	2089.4	2366.1	1972.8	1836.1	2109.4
266911_at	239.6	171.1	168.3	126.2	132.3	155.7	165.6	155.9	164.1	149.5	151.3	202.3	254.7	278.5	274.3	135.3	128	177.9
266914_at	155.5	103.9	135	119.8	60	164	95.6	108.3	114	143.3	83	155.8	113.9	83.4	90.1	100.8	184.6	205.1
266916_at	364.1	619	841.2	688.3	889.6	697.7	664.3	643.3	633.6	740.7	698.9	478.8	275.2	379.5	352.1	760.2	733.7	540.9
266922_s_at	591.3	537	723.7	503.5	422.3	425.2	580.2	610.4	592.4	358	340.8	281.7	472.4	343.9	439	356.3	341.9	310.4
266923_at	1120.5	1156.2	1152.9	888.8	1074.2	1219	1123.8	1143.9	1210.2	1163.4	1265	1536.3	1430	1509.1	1592.1	1105	1283.9	1586.7
266924_at	648.7	777.7	732.8	767.4	638.6	857.5	693	724.8	800.3	628.6	632.3	584.4	697.8	573.6	596.9	629.5	607.5	558
266925_at	3288.4	3567.9	3024.8	3426.9	3340	4091.5	3120.5	2882.7	3223.8	3780.7	4755.8	5615.4	3977.7	3674.3	3218.7	3578.9	4577.4	4273.5
266926_at	165.9	263.1	181.5	107.3	207	225.7	185.9	144.8	162.9	193.8	193.2	274.2	170	184.4	190.2	155.8	198.4	278.2
266927_at	7438.5	7060.8	7320.7	6223.3	6949.3	6228.8	7276.4	7205.9	6994.2	7013.8	6892.8	6598	6582.7	6897.1	6941.6	6941.6	6420.1	6750.2
266928_at	4397.2	3407.3	3129.2	3951.9	3709.7	4620	4284	3894	3887.1	3837.9	4386.8	5478	5650.4	3944.8	4036.5	4355	4211.4	4503.3
266929_at	461	589.3	666.8	346.1	439.2	503.7	485.6	533.8	456.1	557.6	436.7	574.1	533.1	603.5	546	382.6	403.5	418.7
266896_at	966	1003.6	1019.4	858.3	717.6	958.5	909.2	1025.1	935	967.6	933.4	1061.5	748.9	1012.4	943.6	805	902.8	923
266897_at	2118.9	2427.6	2539.6	2704.8	3281.5	3072.9	2522.4	2840.6	2532.3	2948.8	2804.3	3191.1	2400.5	3011.8	2590.3	4037.1	3765.2	3734
266898_at	1685.1	1660.5	1538.7	1675.9	1965.7	2153	1407.5	1538.7	1477.9	2165	1999.7	2241.7	1288.8	1574.1	1449.6	2034.8	2137.8	2257.1
266867_at	742.6	746.4	801.6	819.8	863.7	806.2	629.8	682.8	686.9	746.3	683.1	666.5	542.9	599.8	549.6	716	586.1	647.4
266869_at	249	205.3	297.1	202	169.1	208	235	171.7	177.7	223.7	265.8	183.4	261.1	219	166.4	211.9	221.1	233.5
266871_at	205.1	258.9	190.3	214.5	176.6	261.6	195.8	279.3	312.8	216.4	164.5	186.5	277.2	321.9	290.5	203.9	249.2	234.7
266873_at	346	408.3	443	344.7	294.7	264.3	407.4	353.5	296.9	351.9	417.7	359.7	320.3	332.2	375.4	375.4	322.9	272.7
266874_at	462.1	497.5	678.5	654	866.1	830.8	531.1	505.3	721.2	519.9	548.6	539.2	532.5	599.9	632.6	540.7	846.6	701.2
266876_at	305	310.8	372.9	436.4	371.1	329.3	331.9	380.9	454.1	454.7	394.9	367.9	345.7	303.6	396.7	404.5	347.7	347.8
266880_at	407	412.8	516.6	336.6	395.3	488.3	377.1	465.6	434.3	415.1	513	441.7	419.5	437.7	499.8	496.7	546.6	377.2
266881_at	387.1	483.3	372	333	305.3	305.9	521.3	467.6	455.8	508.8	590	566.8	572.4	392.1	586.7	595.9	731.9	564.6
266882_at	1651.6	1599.8	1500.4	1699.6	1283.1	1736.4	1915.7	1623.3	1762.8	1657.9	1951	1869.7	1554	1709.5	1872.9	1845.3	1791.8	2317.7
266885_at	1828.8	1635.8	1380.3	1352.1	1654.3	1800.1	1539.5	1506.6	1574.9	1429	1728.4	1504.7	1566.2	1492	1758.3	1687.5	2052.5	1926.5
266887_at	7828	8838.2	9286.9	8744.6	8736.8	10295.2	10136.5	9136.3	9136.6	5507.4	7541.2	5373.6	6900.1	6142.1	5512.7	6757.4	6780.6	5641
266888_s_at	206.1	183.7	199.5	287.7	270.7	269.5	238	210.1	132.5	366.1	473.9	399.7	239.5	301	346.6	425	592.5	423.2
266889_at	1687.7	2278.1	2158.5	2723.6	2472.9	2698.9	2153.4	2119.7	2148.8	1740.1	1816.1	1308.4	1231.3	1280.9	1078.7	1943.4	1957.9	1196
266890_at	4001.6	3636	3695.9	3772.7	4554.7	3311.7	3940	3636.1	3684	3382.5	3203.9	2666	3608.2	3391.2	2701.8	2845	3672.7	3393.4
266892_at	6455.2	6283.8	5902.9	3359	3350.8	3430.9	5798.2	5309.1	5182.5	3965.6	3720	3993.2	6213.6	5765.5	6518.7	3031.1	3234.4	3196.2
266893_at	314.9	255.3	275.3	313.9	344.4	304.2	239.7	267.1	280.8	324.8	362.6	313.5	287.8	323.4	323.9	425.2	376.5	398.5
266839_at	720.9	567.4	644.1	621.5	530.4	608.2	551.6	582.7	604	551.2	522.1	732.4	619.5	789.1	585.3	524.9	400.8	403.4
266842_at	612.8	765.2	694.2	511.2	456.1	564.4	635.3	710.2	692.9	552.3	521.7	538.1	630.5	719.5	748.6	515.9	433.4	541.4
266845_at	287.2	249.6	363.1	265.6	309.2	110.2	250.2	251.3	202.1	189.7	205.6	217.4	203.3	225.9	173.9	210.1	225.3	217.3
266846_at	964	1087.3	1193.6	1076.5	892.8	992.1	1034.4	1039.6	1239.1	817.4	842.8	981.7	1048.3	1105.9	912.3	871.3	902.2	860.9
266847_at	519.9	565.3	658.7	620.2	656.3	753.8	640.5	556.4	554.4	659.1	646	643.1	584.9	593.7	575	663.5	718.4	765.6
266848_at	635.4	718.7	682.4	840.4	953.7	684.4	729.9	723.7	661.6	963.5	919.8	646.1	630.3	690.9	702.8	996.8	828.3	746.9
266852_at	278.7	363.7	237.1	281.6	298.5	346.9	376.4	353.1	404.8	256.1	275	291.5	288.8	184.2	249.6	248.4	323.3	222.2
266855_at	325.5	399.3	308	225.8	189.5	282.1	510.4	358.2	333.7	246.2	292.1	256.8	336.8	443.6	409.8	252.2	303.5	329.9
266856_at	1338.6	1410.5	1575.6	1196.4	1031.3	1045.9	1329.6	1316.1	1282.7	1136.3	1104.3	955.1	1333.7	1367.7	1551.2	1048.8	1106.2	1166
266857_at	4825	5640.9	6186.9	4467	4957.9	5063.8	4820.5	5456.5	5462.9	4784.9	5179.4	5397.7	5027	5266.3	4452.9	4860.9	4144.6	4351.6
266858_at	424.6	349.2	375.9	235.8	260.9	223.2	214.7	382.2	351.1	240.1	228.7	317.7	452.8	394.7	469	238.7	238	207.8
266861_at	336.6	367.7	392.2	426.9	496.3	432.3	404.5	361.1	378.9	336.6	506.7	531.2	454.7	390.6	377.6	516.1	426.6	467
266863_at	755.3	948.9	973.1	1146.7	1058.8	968.8	823.3	884.4	896.5	758.1	870.2	778.3	712.5	591.2	532.9	866.9	849.9	820.2
266864_at	516.9	431.6	417.9	410.6	409.3	424.6	402.7	443.9	465.5	526.6	550.6	558.4	674.2	640	615.9	538.8	485.1	501.8
266865_at	3909.7	3816.7	3821.5	4477.2	4118	4195.7	4278.1	4055.5	4817.1	3995.3	3681.4	3596	4014.6	3799.5	4399	3848.2	4350.8	4141
266834_s_at	153	141	122.9	152.5	176.5	88	132.7	153.6	145.2	157.3	121.1	120.9	98.1	128.2	106.2	183.2	168.1	114.7
266835_at	420.1	112.3	202	120.8	143.2	205	228	135	143.8	242.4	316.6	439.9	334.6	341.2	544.4	249.8	308.4	465.4
266804_at	1012.3	939.8	996	845.2	920	1050.3	716.2	988.8	1036.8	1117	1162.3	1112.7	1012.5	1194.3	1172.8	1251.5	1285.5	1457.9
266805_at	746.9	703.7	774.5	813.5	900.2	883.9	842.4	979.6	930.5	900.9	962.9	953.6	990	948.8	1140.7	950.7	1050.8	1515.4
266806_at	916.9	952.2	1258.5	1142.6	1092.7	858.1	1081.9	1089	1145.1	1070.7	902.7	668.8	946.4	900.3	753.3	1188.7	936.5	849.3
266808_at	289.6	378.7	351.2	214.1	212.3	291.4	280.8	261.7	255.9	279.3	202.5	319.4	215.7	225.4	201.3	336.3	234.2	225
266809_at	781.1	812.4	792.2	574.9	800.9	582.4	720.6	680.6	732.2	1014.4	944.1	769.7	756.6	805.3	898.4	783.9	779.2	689.7
266812_at	170.5	163.7	215.8	111.7	161.9	129.4	128.6	181.4	148.8	116.4	76.5	168.5	137.6	128.8	153	139.3	116.1	115.6
266813_at	1482.5	2007.6	2401.1	2002.9	2261.8	1964.4	1459.5	1371	1497.4	1847.9	1754	1624.8	1641.1	1477.7	1379	1577.9	1868.7	1522.6
266815_at	367	332.5	360.6	254.5	234.2	369	380.3	287.1	325.6	190.5	216.3	222	347.4	324	275.5	272.5	258.2	159.5
266816_at	672.3	668.8	640.4	599.5	610.7	567.1	542.4	696.2	577.5	494.2	662.2	562.6	744.6	662.6	695	694.8	654.1	754.4
266818_at	183.9	211	202.1	197.7	194.9	238.4	216.7	212.4	258.8	148.9	194.4	205.5	230.6	302.3	254	191	169.9	194.5
266819_at	2594.8	2999.3	2066.2	2295.9	2179.1	3271.9	2378.7	2393.7	2559.3	2302.6	2526.8	2615.4	2624.6	2534.6	2297.1	2253	2578.6	2541.7
266820_at	468.6	454.3	362.9	436.6	393.6	312.1	505.1	497.3	490.5	428.2	458.8	526.1	592.5	506.5	537.4	396.3	370.6	423
266822_at	1752.3	2011	1813.2	1573	1710.4	1698.8	2297.6	2241.8	2465.1	1478.5	1274	1146.1	1434.8	1288	1261.5	1512	1289.9	1147
266825_at	125.1	208.1	115.4	159.4	121.6	153.5	144.7	160	135.6	132.5	143.2	129.8	133.6	93.4	138	83.6	101.9	125.8
266826_at	183.2	236.5	210.1	304.8	240.6	194.8	240.7	251.3	194.6	282.3	245.7	192.7	200.1	250	249.6	243.4	290.9	196.2
266831_at	150.3	142.5	145.5	180.8	190.6	197.8	140.4	148.4	137.5	210.2	173.7	343.2	256.2	207.5	237.5	176	213.6	320.9
266797_at	230.5	202.6	213.6	333.1	207.9	341.8	207.8	186.8	204.2	297.7	238.9	388.1	210.9	174.9	202.5	242.8	197.7	283.5
266799_at	150.6	98.4	90.5	135.8	177.1	166.4	123.5	100.5	138	162.4	160.3	254.9	162.7	144.2	193.7	343.6	186.8	256.1
266801_at	1064.5	1454.7	1197.1	1151.3	1196.1	1502.9	1494.6	1644.7	1800.7	1180.2	1136.2	787.3	1091.2	1084	753.1	1290.3	1389.2	770.4
266802_at	291.3	254.4	268.5	236	274.5	246.3	355.8	319.1	268.4	353	326.7	349	401.2	406	435.4	308.4	322.6	454.1
266803_at	724.4	658.7	599.4	573.4	492.5	557.5	630.3	590.3	610.7	532.1	518.2	629.4	666	611.5	744	500.9	543.4	552.3
266777_at	1826.5	1822.8	2054.1	1360.8	1457.1	1245.9	1762.1	1973	1898.3	1332.1	1330	1152.5	1830.6	1883.3	1952.9	1401.2	1307.8	1263.5
266772_s_at	144.9	209.1	151.5	112	143.3	127.9	166.8	139.3	147.4	85	97.4	84.1	116.6	101.9	68	111.9	140.4	108.9
266742_at	264.2	355.1	310.1	373.7	453.2	369.6	274.6	329.9	362.6	385.6	337.7	242.3	252.7	194.8	182	289.7	244.9	248.7
266744_at	284.5	412.7	417.4	372.2	283.3	330.8	362.1	351.8	394.8	352.9	277.8	361.2	462.4	451.4	450	343.4	365	375
266745_at	417.5	275.8	336.9	293.7	216.7	256.3	243.5	259.7	221.2	216.8	290.4	280.8	327.2	317.3	266.3	217.5	303.6	212.6
266746_s_at	6359.7	716.5	731.9	2176.2	2103	2516.2	3013.3	2214.7	3020.9	5995.8	4922.4	5779.4	5539.4	5098.5	4783.5	4958.9	4790.7	4541.9
266747_at	163.9	209.2	151.6	189.2	204	193.5	195.1	221.5	339.6	153.7	233.1	154.6	211.9	236.1	260.8	174.9	187.9	281.1
266748_at	524.6	499.5	479	225.5	175.8	284	471.9	557.9	729.4	225.8	211.7	335.6	550.9	746.8	666.6	272.8	322.2	272
266749_at	381.5	325.5	376.6	444.5	508	352.1	403.7	400	354.7	634.4	549.9	607.7	517.3	659	619.2	739.5	599.7	710.6
266758_at	276.5	346.3	289.5	221.2	185.3	273.8	292	348.6	329.7	217.6	232.7	239.6	304.8	278.2	338.3	223.8	240.7	220
266763_at	1685.4	1531.3	1517	1335.7	1123.4	1129.4	1668.4	1605.4	1571.1	1344.3	1285	1398.5	2079.3	2024.9	2104.5	1315.1	1311	1286.8
266767_at	1017.7	1361.9	1183.2	1259.5	1456.7	1428.9	1071.2	1180.9	976.9	1221.7	1403	1148.1	1055.2	1095.7	1040.6	1089.9	1516.8	1275.2
266457_at	1474	1384.6	1380	1905	1690.2	2225.7	1402.2	1531	1761.7	1776.2	1680.6	2055.8	2007.3	1882.3	1921.8	1922.1	2172.7	2095.8
266428_at	502	425.1	351.4	409.9	344.6	307.1	382	379.6	390.4	528.5	465.9	512.2	476.4	526.5	988.9	441.2	433.1	416.5
266436_at	186	188.5	171.7	50.3	111.7	127.5	240.7	254.4	178.2	113.8	92.8	72.3	301.1	178.4	198.3	87.3	104.8	87.8
266437_at	1382	812.4	921.8	937.3	870.1	552.9	1179.2	856.9	909.3	1128.8	848.3	811.5	1541.1	1075.4	1777.1	838.7	719.2	848.3
266439_s_at	63.8	85	58.5	107.5	143	124.6	150.1	107.1	64.1	90.7	99.7	130.1	82.5	100.6	125.4	114.2	98.2	95.3
266440_at	208.4	194	252.3	249.3	232.5	211.4	168.1	210.7	212.1	208.9	172.4	269.9	229.9	188.8	161.2	192.4	234.2	197
266768_s_at	8212.9	11676.8	12071.5	9539	10986.9	11668.9	11551.2	10184.8	10581.6	9431.7	9468.1	8740	7455.1	7271.8	6325.1	9098	8187.4	8256.6
266734_at	465.7	334.9	434.7	393.7	356.4	363.5	398.3	409	411.1	380	331.6	334.3	453.8	445.1	559.5	353.9	372	395.1
266735_at	770	774.8	746.9	1086.6	939.5	997.7	733.6	817.5	747.5	911.1	803.1	773.5	824.3	724.6	766.7	868	762.9	759.6
266738_at	89.8	63.2	98.3	89.1	116.5	115.3	92.7	110.5	99.2	73.7	73.9	76.7	137	102.1	135.1	78.1	55.3	114.5
266716_at	19732.7	18085.9	17654.9	18252.2	16972.7	20896.5	17646.7	16878.4	15846.2	18747	18979.3	18878.9	18638.3	17392.6	18833.3	13383	15767.7	19106.3
266717_at	136.8	146.8	171.2	151.6	131.5	118.1	125.1	116	93.6	145.9	143.7	212.3	85.8	138.8	171	87.7	157.3	173.5
266718_at	593.5	494	513.4	515.3	457.5	432.3	543.9	571.1	495.5	432.9	447.5	478	476.7	609.7	553.3	456.4	522	553
266721_at	282.4	254.7	267.4	254.5	236	206.4	283.3	307.7	253.4	251.1	261.7	328	314.8	293.7	305	262.2	274.4	270.9
266727_at	302.5	269.6	244.2	423.2	276.3	322.1	268.6	239.1	197.1	248.1	335.2	214.4	137.4	265.5	245.5	312.3	338.5	283.4
266728_at	375.8	266.6	367.5	296.2	220.2	155.6	335.1	358.4	252.3	252.5	211.9	261.4	363	414.8	386.7	233.5	244.5	208.4
266733_at	69.7	78.2	78.8	70.1	112.6	121.7	64.9	76.7	79.7	60.6	67.6	88.1	82.7	70.7	58.4	94.4	91.8	81
266707_at	741.9	610.6	542.8	658.7	697.8	471.7	532.6	534.5	417.7	791.9	857.7	860.9	861.8	771.5	772.7	698.6	668.3	800.4
266709_at	2217.5	2030.4	1926.2	1983.6	1590.2	1634.5	2237.2	1991.8	2281.4	1733.3	1741.2	1802.7	2680.7	2098.5	1821.4	1533.8	1211.3	1318
266679_at	352.2	444.2	349.8	264.3	305.6	246.5	487.3	361.1	350	267.5	310.1	310.6	373.3	366.5	338	308.7	374.3	283.5
266682_at	211.5	254.6	294.2	112.9	148.8	145.1	225.2	245.8	287.6	193.5	117	140.7	216	209.1	208.1	148.7	178.9	130.7
266683_at	173.6	164.8	237.8	162.7	206.8	215.1	204.3	168.3	186.5	241.2	200.6	229.7	259.8	149.7	211.3	182.2	214.7	208.9
266684_at	260.2	273.7	363.2	473	332	395.7	390.5	420.5	415.1	300	297.3	235.5	323.2	261.9	226.7	384.1	348.2	234.8
266685_at	237.1	144.1	163	108.1	122.5	176.9	157.2	129.2	179.2	137.5	160.9	244.2	208.3	179.4	183.3	160.5	100	155.8
266687_at	339.7	595.2	462	716.2	612.5	504.2	582.7	644.1	583	459.5	343.1	232.4	307.1	255	197.5	478.4	417.7	304.4
266694_at	1721.5	1698.3	1489.3	1878	2175.7	2217.1	1620.6	1591.2	1570.1	2208.6	1957.3	2105.2	1947.1	1892.4	1920.2	2315	2516.3	2502.1
266695_at	718.2	655.1	576.3	369.5	396.8	438.6	626.5	682.9	613.2	625.8	655	1076.2	1138.3	909.1	1153.6	652.1	646	1021.9
266696_at	1151.9	1242	1254.3	1337.7	1261.2	1129.2	1345.3	1349	1300.4	1257.1	1250.3	960.4	955.3	1229.9	1014.7	1355	1215.1	962.2
266698_at	692.7	628.8	562.8	771.5	512.3	470.1	501.9	673.5	404.1	814.4	761.8	918.4	752.6	555.4	907.9	788	894.8	1076.7
266699_at	12554.4	15055	17652.9	15218	17784.8	17182.2	14680.8	14283.9	14510.1	10601.5	10089.2	9391.5	9998.9	9829.9	8240	12018	10864.1	9311.3
266700_at	1884.4	2263.7	2224.2	2401.3	2183.4	1911.6	2297.5	2406.7	2344.2	2022.9	1804.1	1436.4	1286.3	1488	1258.7	2092.9	1694.5	1441.5
266701_at	1585	1890.6	2111.4	1406.4	1610.7	1385.7	1564.9	2129.9	1582.1	1565.1	1284.3	1551.9	1836.4	1571.7	1891.6	1342.3	1477.7	1438.3
266702_at	582.3	728.4	807.1	856.7	756	906.7	749.3	741.7	690.2	755.7	805	828.2	654.8	775.4	776.8	758.7	792.3	834.1
266703_at	347.7	404.7	410.8	411.9	458.1	578.9	445.4	502.1	600.9	372	364.5	365.9	256.8	359.5	361.4	413.9	524.6	375.7
266704_at	1565.3	1551.4	1685	1829.5	1980.5	2070.5	1549.8	1602.1	1476.5	1352.4	1243.7	1388.5	1348.8	1223.5	1104.3	1363.3	1397	1137.6
266705_at	2204.8	2537.8	2607.5	2408.3	2614	2018.7	2649.2	2422.9	2399.9	1970.1	2000.2	1573.5	1132.7	1427.1	1323.9	2392.7	1695.7	1371.3
266678_at	1620.5	2257.7	2204.9	2522.2	2026.1	2796.2	2201.7	2011.5	2080.6	1440.9	1793	1578.2	1455.4	1518.9	1508.5	1736.8	1683.4	1470.7
266647_at	284.6	341.4	364.9	242.6	307.8	228.9	322.6	248.6	332.9	204.5	294.2	163.8	183.9	222.2	241.9	198.4	191.1	144.9
266648_at	1005	1610.5	1328.4	1548.6	1335.9	1573.4	1340	1375.9	1311.1	973	1066.9	998.9	921.3	898.9	664.9	1165.1	1013.8	781.7
266650_at	525.7	516.3	513.1	476.1	389.7	523.9	397.3	439.3	459.8	457.4	417.2	488.5	405.3	501.7	529.6	416.6	451.3	444
266651_at	317	305.1	351.2	213.6	213.6	260.2	324.6	316.5	290.6	237.8	284.8	335.4	342.2	353.4	360.6	266.4	252.9	311.3
266652_at	458.4	447.2	512.6	406.3	378.9	286.1	438.8	426.7	510.3	447.1	465.3	456.2	486.6	456.1	502.5	493.7	401.5	392.7
266653_at	346.4	311.3	327.3	315.2	244.3	436.5	368.8	329.6	386.1	374.9	337.7	487.9	438	409.6	387.1	384.3	371.3	490.4
266655_at	198.3	369.1	334.1	293.6	285.8	271.2	230.3	252.2	286.6	219.3	245.5	223.3	181.8	104.8	149.5	218.9	201	167
266656_at	928.2	869.6	845.1	678.3	616.7	660.6	797.4	828	618.7	725.3	681.6	860.3	907	792.5	901.1	738	874.7	714
266657_at	966.5	913.4	825.2	801.1	964.7	1086.6	928.4	927.8	888.6	1254.9	1074.4	1282.1	1403.2	1041.5	1252	1022.4	1290.6	1386
266659_at	268.2	195.2	255.6	174.5	183.1	137.4	172.6	215.4	237.1	271.1	209.8	205.7	296.9	342	373.3	195.6	190.5	239.6
266660_at	208.6	229	259.5	225.7	259.1	205.2	208.2	190.8	262.3	207.4	206.5	205	280.5	197.4	183.3	213	223.8	151.4
266662_at	1526	1746.5	1543.5	1725.2	2101.4	2637.1	1445	1804.7	1556	1727.4	1900	1431.2	1414.2	1436.7	1018.8	1605.4	1757.6	1230.2
266663_at	88.9	124.1	104.8	92.2	63.6	112.1	79.1	106.7	88.7	59.1	66	93.4	75.7	55.1	86.2	88.3	112.8	86.4
266668_at	243.1	187.4	222.3	202.1	202.2	222.5	282.5	322.8	309.7	148.3	155.3	117.1	148.1	138.2	93.8	150.1	167.1	96.2
266671_at	376.8	470.4	312.1	504.4	605	646.6	387.2	394.5	502.3	336.9	596.3	446.2	341.6	395.7	365	482.9	439.6	563.3
266672_at	3354	4436	2870.6	4123.5	2897.4	4312.7	2917.5	2867.9	3111	3522.6	3524.6	4909.8	3852.5	3103.7	4203.1	3515.9	3828.6	4629.9
266673_at	8280.3	9183.8	8926.1	10147.5	10108.1	9546.8	8172.4	7926.2	7606.2	11291.8	10659.1	7844.5	11832.8	9972.2	10048.7	8769.8	8674.3	8158.7
266643_s_at	145.5	162.3	182.7	136	143.8	118.8	116.4	209.7	153.8	195.5	173.6	52	133.8	109.1	123.3	131.7	134	155.1
266646_at	2845.1	2382.9	2437.1	1547.3	1643.4	1415.2	2164.7	2255.8	2676.8	2017.3	1900	1947.4	2496.8	2189.4	3220.9	1753.1	1845.4	2353.1
266615_s_at	519.6	408.4	349.3	373.9	366.3	419.3	394	356.3	316.3	438.4	494.1	744.3	503.4	492	611	530.3	493.5	542.3
266616_at	153.6	196.3	177.9	215.9	158.8	186.5	117.6	146.2	128.2	137	119	132.5	94.3	82.8	73.6	113.7	114.6	124.5
266617_at	2082.3	1797.3	1569.9	1763.3	1722.1	1878.6	1972.6	2017.1	2160.9	2244.3	2072.7	2411.9	2845.9	2971	3044.2	1746.2	2126	2568.1
266620_at	469.6	651.5	620.4	536	603.4	508.4	502	463	510.4	524.5	576.8	414.9	534.5	435.1	459	390.6	456.3	326.3
266621_at	654	680.7	544.8	757.9	942.8	765.3	580.6	611.4	530.1	862.6	816.1	835.6	731	605.8	632.8	901.4	821.5	785.9
266624_s_at	411.2	472.9	369	484.7	532.8	420.9	474.5	450.8	474.9	481.8	510.1	346.2	463.1	408.1	403.4	494.1	460.9	396.8
266626_at	120.5	146.9	136.5	253.4	160.2	131.1	143.7	138.1	164.4	128.8	219.4	139.6	157.4	198.5	154.8	189.5	209.6	180.6
266634_at	108.5	104.2	136.4	90.8	87.5	96.9	100.4	106.5	116.3	86.3	103.4	137.9	107	137.5	111.8	87.8	108.4	103
266635_at	498.7	528.4	567.7	518.9	404.9	520.9	556	515.5	546.2	484.8	522.7	559	608.3	485.8	659.4	512.5	641.3	531.8
266636_at	14707.5	15192.1	16357.7	15416.1	19200.3	19393.4	14214.6	12902.4	12296.4	14248.3	15826.5	15134.3	13985.4	12330.7	11914.6	14214.9	14859.8	15853.2
266638_at	3230.7	3806.2	3445.3	4563.5	4148.9	4904.1	3268.5	3074.5	3072.3	3952.4	3980.2	4935.4	3566.3	3491.6	3399.7	3826.7	4335.5	4627.1
266639_at	775.1	891.6	649.9	986.1	750.7	959.1	966.1	883	872.9	671.4	971.7	1105.7	936.2	818.4	735.6	914.3	942.1	928.4
266641_at	512.3	641.9	650.5	725.2	759.7	772.9	653.3	604.7	691	644.5	581.9	679.2	474.6	462.1	439.8	685.3	540.3	602
266642_at	2650.7	3373.9	3595.4	3698.4	3290.5	3706.5	3021.7	2900.6	2924.8	2584.5	2783.5	2428.1	2243.1	2399.4	2044.8	2660.2	2738.7	2008.1
266608_at	1961.3	2653.3	2306.8	2496.8	3115.8	2472.3	2452.9	2312.5	2303	2002.4	2160.9	1321.7	1558.9	1707	1265.3	2237.8	1997.7	1420.2
266609_at	391.1	351.1	429.2	390.7	503.3	419.9	385.2	387.9	359.5	450.1	455.4	583.5	418.8	477.5	442.6	428.4	389.4	493.4
266612_at	126.3	129.2	183.1	155.9	173.2	169.6	189	150.6	168.5	113.9	164.3	111.3	114.7	84.9	166.7	145.6	143.9	174.8
266613_at	314.5	284.2	286.7	245.7	349.3	309.7	339.4	286.7	274.9	368.3	356.5	311.1	428	353.6	462.8	428.7	588.4	593.4
266614_at	3304.8	3659.8	3600.8	3534.8	3807.8	3557.3	3274.4	3334.2	3201	3660.5	3763	3866	4123.9	3622.3	4081.5	3395.1	3791.7	3934
266587_at	1996.1	2652.4	2474.9	2727.9	2806.6	2791.5	2561.6	2433.1	2728.7	2036.9	2044.7	1529.7	1627.3	1442.4	1269.7	2205.3	2131.2	1511.4
266588_at	3134.7	3714.8	3731.8	3699.8	3904.2	3883.2	4212.2	3694	4124.9	3049.5	3315.4	3110.1	2337.8	2434.9	2875.7	3186.2	3229.2	3070.1
266589_at	87.8	73.8	84.7	92.8	135.5	41.3	121.1	131.7	91.5	94	95.3	55.8	76.4	75.8	106.3	100.5	111.8	75.1
266590_at	163.7	127.4	127	181.4	130.2	112.1	149.9	146.1	148.7	140.7	154.9	141	144.6	163.6	179.6	152.8	145.1	132.8
266591_at	392.6	447.4	434.9	506.6	466.8	441.8	368.1	463	383.8	494.4	485.6	530.6	414.3	448.6	503.4	412.6	465.7	538.5
266592_at	72.4	124.1	77.2	100.3	56.5	83.3	76.8	76	83.7	72.4	73.7	89.4	84.3	105.8	96.3	98.3	82.7	95
266595_at	334.5	284.2	366.3	392.5	392.1	374.9	392.1	345.7	338.9	302.2	434.2	311.8	409.4	374.7	422.7	536.5	384.9	342.9
266598_at	210.7	280.6	320.9	310.4	239.4	247.9	285	247.3	214.6	303.2	241.4	238.1	278.2	217.9	334.2	300.5	281.2	294.1
266599_at	2120.7	1529.5	1594.3	1437.5	1872.1	2445	1658.3	1638.7	1440.2	2531.2	3132.1	2645.8	2505.4	2016.2	2935.6	2561.2	3157.4	1932.1
266600_at	208.9	269.5	283.2	269.9	264.2	253.3	169.6	178.7	213.5	248.5	260.2	312.1	203.7	248.3	250.6	191.8	230.1	226.9
266601_at	478.9	365.4	387.8	382.1	293.1	320.9	354.2	370.4	425.1	364	368.3	416	413.8	466.7	399.7	336.9	372.2	377.4
266604_at	553.6	532.1	534.3	640.8	662.3	769.7	504.7	553.8	583.3	635.5	625.9	823.6	385.3	662.7	639.6	601.4	628.8	796
266605_at	391.3	413.8	473.8	308.7	223.4	246.4	369.7	317.9	333.9	259.1	287.8	250.3	379.2	353.2	454.9	273.1	321.3	277.3
266580_at	365.1	326.4	365	330.2	246.9	278.1	305.7	338	345.9	315.5	329.4	508.9	461.4	381.2	431.2	379.1	302.8	273.7
266581_at	205.7	184	188.5	158	254.5	222.7	220.4	229.5	201.5	289.4	322.7	343	378.7	330.9	424.2	273.8	313.7	396.1
266582_at	1474.3	1613.9	1622.2	1467.8	1054.6	2143.2	1471.6	1460.9	1588.4	1089.9	1552.5	1540.2	1382.3	1321.7	1106.9	1625.8	1365.6	1417.5
266583_at	3691	4379	3805.3	4314.6	3426.2	3558.8	4106.9	4130.3	3957.4	3764.7	4000.3	3439.8	3960.2	3559.5	3423.5	4581.8	4497.6	6111.5
266552_at	7733.1	8277.9	6908.4	7967.7	8622.1	12717	8560.8	7891.9	8310.5	7588.7	8110.4	10066.8	6494.3	7245.7	6310.7	8245.2	6046.4	8454
266553_at	2402	1898.7	1889.8	2318.7	1927.5	2599.7	2165.8	1911.5	2265.3	2265.1	2212.6	2811.4	2131.2	2294	1868.5	2061.3	2084.1	1959.5
266554_s_at	2270.8	2354.5	2481.4	2756.3	2164.2	2472.3	2306	2460.9	2642.9	2734.2	1992	2006	1961.7	1833	1642.8	2189.3	2037.2	1819.3
266556_at	1929	2230.9	2131.1	2509.4	2393.6	2743.4	2082.3	2320.3	2179.4	2263.7	2055.2	1892.2	1958.3	1737.2	1692.5	2228.4	2246.9	2190.1
266557_at	551.4	458.6	457.2	428.5	521.8	456.4	444.5	507.6	524	597.1	637.6	719.2	543.3	557.1	662.3	609.4	617.2	650.9
266566_at	453.7	373.7	397.7	518.6	332.7	448.7	430.1	444.3	315.5	444.6	571.3	709.8	607.6	630.1	605.5	582.9	544.4	570.5
266567_at	597.4	583.2	557.8	565.2	590.1	668.3	851.9	807.3	858.4	413.7	470.2	331	459.7	446.8	420.6	532.8	484.6	368.7
266570_at	5306.9	6405.3	5682.5	6365.4	6147.6	6757.8	6119.4	5557.5	6151.6	4421	5131	3947.9	4851.3	4040.2	3425.2	5244.8	5730.4	4091.7
266572_at	810.6	688	591.8	530.2	586.7	887.7	517.2	506	470.2	789.4	866.1	1341.9	1022.1	891.4	1025.4	687.8	891.1	1107.2
266574_at	203	159.8	214.2	227.8	254.6	188.5	243.1	242.4	219.8	209.7	202.1	184.8	187.4	212.7	128.6	206.8	216.5	138.9
266575_at	1328.7	2067.5	1729.5	2273.6	2619.8	2038.9	1569.9	1605.4	1526.9	2343.1	2545	1466.3	1122.9	1278.3	1158	2450.6	1795	1504.5
266576_at	1591.3	1532	1339.9	1339.2	1423.9	1209.9	1381.8	1568.1	1573.1	1358.6	1356.4	1086.5	1707.2	1493.1	1538.3	1397.7	1570	1374.5
266578_at	101.6	84	108.6	87.6	88.8	174.8	81.3	120.7	107.3	110.1	132.6	145.4	149.9	136.1	107.5	80.4	113.9	108.3
266579_at	2149.4	2590.4	2864.3	2909.7	2626.7	3405.3	3464.4	2870.3	3307	2308.1	2469.1	2159.1	1913.9	2097.1	1994.8	2899.6	3032.9	2549.4
266520_at	185.5	176.4	232.9	250.8	134.9	184.4	187.7	177	227.2	200	292	461.1	233.1	228.2	304.2	260.2	249	348.4
266521_at	1867	2308.2	1886.5	2913.4	2522.2	2432	2087.6	1766	1913.9	1832.8	2182.5	1823.4	1541.8	1386.1	1385.7	2361.8	2221.2	1733.9
266522_at	223.8	185.8	203.4	217.2	183.5	193.4	204.1	214.2	224.5	170	142.6	203.6	201.4	202.9	190.6	180.6	179.1	136.6
266523_at	684.7	598.9	778.3	515.6	383.1	534.1	698.3	660.2	693.9	555.5	559.4	630.7	664.9	851.2	737.7	564.9	542.9	671.5
266529_at	83.2	83.7	102.1	115.3	54.6	74.1	87.2	78.2	81.1	104.8	97.3	90.1	79.4	93.8	70.6	88.5	84.7	97.6
266532_at	118.3	104	47.4	96.3	170.7	118.4	111.9	150.9	148.7	106.2	188	255.1	121.1	228.5	263.9	170.4	223.6	261.2
266533_s_at	11019	11906.7	14118.1	12934.2	12001.9	12354.3	11322.4	11159.2	12253.1	10028.9	9218.2	8213.7	8992.6	7751.9	8481.8	8461.8	8583.7	8068.3
266534_at	528.6	544	496	603.3	575.6	513.5	583.7	553.9	613.5	533.4	456.1	511.1	530.6	547.7	526.3	523.6	540.1	532.6
266535_s_at	2043	2282.2	2744.5	2452.2	2650.6	2408.7	2325.4	2454.9	1855.7	2310.9	2645.1	2206.9	2118.3	1936.3	1837.2	2560.3	2516.3	2653.3
266536_at	295.2	377	360.2	228.2	286.3	352.8	375	337.3	380.4	378.4	419.6	351.9	366.4	336.7	336.7	388.9	434.4	457.5
266537_at	533.6	458.7	596.9	491.2	588.4	495.5	517.6	553.5	441.8	624.3	571.5	523.8	486.4	468.5	523.7	537.1	439.6	520.6
266541_at	696	480.1	474.9	530.2	450.8	411.3	493.5	406.3	453.7	531.9	470.1	512.6	513.7	621.2	628.5	477.3	424.6	465.2
266542_at	247.7	247.3	250.1	240.9	312.3	311.6	237.1	227.8	292.8	310.1	228	310.1	235.3	248.1	227.2	219.8	238.3	278.7
266547_at	489.9	380.3	351.4	337.1	463.3	466.4	385.2	429.2	358.9	381.4	425.2	493	435.4	507.8	486	552.9	553.3	385.8
266551_at	3420.6	3488.3	3145.7	3633.5	3105.7	3856	3274	3196.7	3056.4	3967.7	4144.3	4265.5	3307.5	3260	3228.8	3528.5	3744.2	4441.7
266517_at	574.6	655.2	757.1	674.3	636.7	708.9	681.9	741.1	652.4	717.7	812.6	844.6	610.3	595.6	700.7	769.2	746.2	851.8
266519_at	393.7	484.8	473	622.6	493.6	605	519.5	467	488	555	496.1	585	436.1	425.5	440.9	505.6	499.3	283.8
266489_at	417.1	639.5	580.9	398.7	453	389.5	510.4	609.1	480.9	368	368.9	283.2	533.3	379.4	408.4	436.9	471.8	337.2
266495_at	1654.5	1606.3	2046.1	1347.9	1550	1056.1	1312.4	1750.5	1478.3	1615.7	1556.4	1180.2	1200.6	1473.9	1333.3	1458.9	1274.9	1209.3
266500_at	1112	1478.6	1315.1	1548.2	1478.1	1844.9	1571.1	1577.6	1535.4	1602	1679.6	1472.1	1390.6	1402.6	1561.1	1607.7	1696.9	1953.7
266501_at	191.6	164.6	242.6	184.3	214.3	209	194.9	227.7	258.5	182.2	188.5	145.6	253.5	198.1	159.9	144.7	197.5	142.2
266505_at	239	157	156.8	243.8	157	212.1	140.9	140.8	170.4	263.9	267.1	218.8	221.2	168.9	219.2	228.7	284.5	272.8
266506_at	451.9	441.3	371.5	432	357.4	393.5	432	426.2	409.6	484.1	425.1	409.3	538	478.2	444.8	488	372.8	305.3
266509_at	3767.2	4725.8	4077.9	4279.8	4167	4677.1	3682.8	4019	3895.9	3119.4	2728.1	2283.4	3506.5	2832.7	2923.3	2837.6	3208.4	2629.8
266510_at	365.6	504.2	425.4	481.9	446.8	382.7	448.5	560.9	572.8	344.9	330.5	190.5	243.4	269.8	263.3	354.6	293.8	227.9
266511_at	117.3	95	86.7	111.9	95.5	139.5	100.4	109.8	139.3	133.6	107.7	108.3	161.2	113.2	128.5	135.3	114.3	154.7
266512_at	415.8	490	440.6	252.8	331.1	258.5	494.7	456.9	419.4	280.4	228.9	237.5	364.2	462.9	383.8	221.3	247.7	222.9
266513_at	349	412.8	360.9	384.6	398.2	462.4	319.3	341	323.1	482.2	445.5	406.2	371.3	424.5	474.1	477.3	439.3	441.5
266514_at	672.2	584.4	624.6	560.5	638.5	680.7	543.8	507.6	544	898	1053.9	1029	952.3	990.4	1095.1	720.9	701.2	1137.4
266515_at	361	514.9	519.4	389.6	408.1	527.2	419.4	476	468.4	340.5	381.4	459.5	472.8	512.7	457	328.6	481	495
266516_at	192.4	81	116.7	151.7	97.9	107.6	202.3	160	179.2	305.8	304.8	891.9	605.7	553.1	1182.3	192.9	351.4	784.2
266482_at	575.7	663.7	622.2	653.1	683.9	763.8	704.7	686.5	695.3	677.7	751.9	672.8	380.6	521.5	462.5	793.4	707.2	707.8
266483_at	1853.2	2452.3	2251.6	2075	2185.9	2071.3	2095.6	2195	1835.5	1788.2	1686.5	1551	2358.7	1806.4	1478.6	1645.5	1700.8	1567.4
266484_at	493.2	388.4	504.2	398.7	396.3	441.2	455.2	474.9	400.5	475.7	463.4	470.4	482.6	506.7	518.4	420.4	455	573
266485_at	331.1	320.6	428.6	302.7	428.1	299.1	417.6	398.5	319.5	267.5	322.8	262.1	321.6	287.7	310.9	433.8	363.5	340.7
266458_at	3668.4	3384.4	3489.9	2849.5	3096	3385.4	3505.7	3330.6	3189.3	4147	3956.2	5555.6	5503.5	4825.7	4539.1	4170.9	4261.6	5629.4
266459_at	1257.6	858.5	883.4	1018.4	995	1170	1002.3	1092.7	1132.5	1075.1	989.4	1341.5	1265.7	1226.7	1269.6	913.3	1192.5	1320.3
266460_at	510.2	736.5	694	487.6	579.1	681.4	613.4	719	751.2	364.5	442.4	400.1	299.1	492.6	448.7	615.4	473.9	456.3
266461_at	6716.7	3961.5	3917.1	3838.6	3396.7	3942	4417	3757.2	4347	5061.5	4852.1	5974.9	4329.4	4743.7	4853.5	3897.4	3738.2	5116.4
266463_at	1371.5	1695.8	1520.2	1555.1	1609	1529.3	1599.4	1693	1599	1173.6	1282.6	1262.1	1192.8	1356.3	1276.7	1303.5	1265	1257.8
266464_at	361.7	174.6	226.9	203.9	163.4	207.8	240	217.6	208.8	337.5	296.8	329.4	263.3	265	390.4	238.6	212	240.1
266466_at	416.7	373.8	433.6	515.8	427.7	513.3	416	524.4	458.3	308.3	514.5	360.8	340.9	346	298.3	456.8	404.9	393.8
266467_at	552.5	427.6	385.5	461.7	500.2	587.1	469.2	504.5	579.8	639.4	585.6	643.5	527.5	588.7	627.3	611	641.4	651.2
266468_at	802.2	701.2	589.6	639.3	617.6	470.8	573.9	752.3	723.2	765.3	659.1	629.4	635.7	631.8	834.5	811.5	777.2	653.8
266471_at	704.4	586.6	575.2	816	630.5	662.1	723.4	825.9	892.5	611.4	564.7	618.6	590.1	729.1	446.3	723.2	593.1	395.3
266472_at	110.1	166.1	185.2	169.1	188	166.9	171.6	194.8	141.1	172.6	172.7	115.8	121.8	183.9	102	150.7	148.9	91.7
266474_at	122	120.7	90.1	178.6	124.7	128.4	142.5	142	161.9	189.4	174.2	227.7	212.1	194.8	289.9	163	122.9	126.4
266476_at	828.7	721.4	500.7	734.1	642.2	545.1	742.7	703	682.2	846.7	645.1	769.7	627.9	569.9	685.1	875.7	836.1	781.2
266478_at	853.3	967.2	800.7	1160	1208.9	1271.3	852.4	974.1	807.4	846.1	730	543.8	529.8	533	418.6	857.3	747.9	585.3
266479_at	70.9	113.1	130.8	85.6	95.7	76	98.6	97.3	157.6	126.4	104.5	142.1	145.9	85.9	85.2	94.7	140.1	81.3
266480_at	138.1	71.8	78.6	58.8	116.3	77.4	97.8	88.8	72.7	108.7	104.2	108.5	121.6	129.4	171.8	130.9	91.2	204.6
266481_at	540.4	612.4	500.8	549.6	477.3	394.2	504.2	509.1	559	461	525.5	474	472.2	562.5	540.2	492.2	452.5	524.2
266442_at	288	263.9	276.3	371.2	309.5	251.2	277.9	353.9	305.2	376.2	271.4	284.7	307.1	285.1	304.4	385.4	267.4	327.7
266445_at	863.9	809.7	893.2	726.9	515	608.8	676	969.3	881	875.4	726.5	871.6	999.2	1168.7	1033.5	638.6	675.3	752.3
266315_at	259.3	266.1	279.2	250.4	261.3	189.7	229.1	310.4	302.4	203.3	207	193.3	214	264.3	328.9	213.4	185.7	279.7
266317_at	1457	1743.3	1654	1769.8	2050.6	1507	1640.1	1478.2	1762.1	1854.8	2132.3	1848.2	1254.4	1491.5	1645.3	1935.7	1767.9	1784.4
266318_at	217.6	206.8	269.6	181.4	201.9	197	180.3	206.6	194.7	205.1	127.8	186.3	203.7	239.7	262.9	170.9	149.4	188.8
266319_s_at	219.5	152.2	163.2	192.4	183.1	210.9	166.7	147.6	128.1	136.5	144.6	189.2	216.3	194.4	169.4	155.8	155.1	156.3
266320_at	87.9	124.4	102.8	183.2	191.3	169.5	100.8	130.5	167	223.5	189.8	235	205.3	195.3	176.6	210.2	346.7	306.5
266322_at	289.3	400.9	356.6	457.1	471.7	458.3	406	365.4	414.1	654.6	501.5	655.9	497.1	531.8	533.9	589.9	574.6	615
266323_at	123.1	148.4	139.6	139.6	183.6	87.8	78.3	147.5	162.4	163.8	180.7	146.6	77.9	116.9	131.1	104.1	154.4	144.5
266324_at	378.3	343.8	321.4	411.1	359.8	312.8	357.7	389.4	353.5	306.2	317.2	323.2	260.7	370.9	339.2	350.2	326	404.4
266325_at	450.4	476.5	443.7	353.1	357.8	248.9	500.1	441.6	526	451.2	433	426.4	402	432.4	626.9	381.6	408.3	321.8
266326_at	2268.9	2870.1	2854.3	3377.4	4019.9	3317.4	3653.8	3326.7	3027.2	3965.5	3784.5	2855.5	3101.1	3416.3	3461.7	4480	4623.3	3762.2
266327_at	104.7	175.4	144.9	125.3	205.7	115.2	145.3	214	174.7	254.5	238.7	304	481.5	576	369.6	608.9	675.2	581.2
266268_at	310.1	310.7	390.9	382.3	279.1	294	376.3	368.7	341.8	251.6	328.2	275.8	309.4	358.3	371.1	287.6	323.3	249.6
266271_at	52.4	77.3	53.3	107.5	69.5	106.7	88.8	64.7	76.5	129.1	90.3	120.2	105.3	107	101.9	100.6	112.4	129
266116_at	408.3	314.3	356.4	349.5	322.7	507.4	399.1	416.4	307.2	428.9	484	812.8	656.1	502.5	606.8	617.7	529.6	741.3
266117_at	212.8	196.3	227.6	223.7	232.7	245.1	174.9	195.6	175	222.4	278	194.5	167.6	140.7	179.7	166.9	219.4	152.3
266118_at	4550.7	4064.9	4571.4	3685.1	3874.6	3526.9	4678.3	3516.4	4216.2	3753.1	3135.3	3291.9	3911.8	3023.9	4699.7	3642.7	2286	3059
266119_at	5329.3	5315.5	5875.4	6015.1	5289.4	7128.5	4560.3	4530.1	5460.4	6436.6	5292.8	7969.8	5557	5792	5858.7	5166.7	6366.3	6703.3
266120_at	1187.2	1243.7	1178.9	1108.8	1307	1231.9	1137.3	1003.2	1060.5	1376.3	1402.6	1364.5	1015	1342.2	1188.6	1154.9	998.9	1169.6
266121_at	492.5	352.5	424.2	383.6	337.8	300.9	413	434	456.3	378.7	356.3	327.1	354.6	446.7	453.4	313	394.6	306.9
266122_at	483.1	565.5	451.2	500.6	392.3	386.3	336	478	474.6	599	560.9	538.3	427.3	501.1	562.4	477.2	520	466.1
266123_at	16569.1	15022.3	15462.3	18578.1	17853.2	19554.1	18255.7	15590.6	16638.4	14235.8	12272	11921.4	14898.2	13621.2	14820.8	12801.5	13554.3	12979.6
266124_at	82.1	118	71.1	79	157.8	80.5	121	122.3	164.2	162.1	133.5	135.6	164	93	127.1	154.6	135.9	135.6
266127_s_at	1110.4	1103.9	1242	1087.5	1103.6	1046.5	1410.8	1584.4	1541.9	850.1	1224.9	884.7	1014.5	1007.2	1081	989.4	971	824
266130_at	122.9	149.2	117.6	112.1	93.5	156.4	129.3	99.8	111.3	118.9	108.3	130.4	99.8	77.5	119.5	71	146.3	93.1
266131_at	418.6	465.4	457.8	386.1	346.3	411.7	464.5	494.8	414.9	498	389.9	388.4	415.9	438.7	423.8	402.7	374	343.2
266447_at	307.9	315.6	223.5	390.2	410.5	417.3	455.5	458.4	450.2	390.4	362.4	376.3	499	388	361.5	636.7	486.7	499.5
266448_s_at	332.6	248	290.4	306.5	343.2	242.1	334.6	294.8	283.7	310	348.6	379.6	292.4	294.4	360.3	365.7	336.7	304.5
266449_at	327.2	264.4	251.9	318	324.6	318.8	244.1	328.2	347.6	340.1	374.6	397.9	383.4	339.8	385.9	389.5	474	382.8
266450_s_at	234	334.9	290.3	231.8	178	234.4	256.9	267.6	246.8	281.9	200.1	193.3	221	230.3	231.1	286.3	222.1	193.8
266451_at	3224.3	3792.8	3284.6	4225.5	3029.8	4234.9	4069.2	3697.2	3844.4	3146.6	3355.5	3487.8	3341.9	3346.9	2836.3	3720.6	4106.4	3242.3
266452_at	98.3	73.8	113.9	133.4	131.8	109.4	108.8	76.5	85.8	95.7	103.6	134.3	129.8	77.9	120.5	133.7	142.2	126.2
266394_at	673.1	636.6	557.4	613.5	560.8	1111.7	609.2	603	549.5	608.8	590.8	613	735.2	702	618.8	761.7	541.5	741.9
266395_at	3553.8	3823.4	3802.2	4299.2	3780.4	5070.9	4569.7	3912.8	4291.2	3164.7	3778.5	4540.1	4598.3	4983.7	5174.4	4073.3	4544.3	4902.4
266398_at	275.9	267.3	259.6	373.3	474.6	390	289.3	236.2	290.7	362.1	353.4	228.9	450.8	223.4	271.7	366.3	230.9	254.4
266399_at	1370.7	1448.9	1273.6	1522.4	1518.4	1641	1246.7	1341.4	1290.5	1636.5	1708.2	1734.1	1529.5	1567.4	1481.6	1577.4	1556.2	1666.5
266400_at	249.2	216.7	195	261.2	242.7	310.4	198.8	234.8	234.8	179.2	170.5	240.1	280.5	185.6	214.9	219.2	244.8	221.9
266401_s_at	116.4	114.1	166.3	81.8	119.5	87.9	115.6	149.2	98.4	156.3	178.8	121.9	118.8	65	85.6	136.1	83.9	87.6
266402_at	349.1	379.2	335.9	360.9	492	385.9	277.7	287.4	308.9	390.8	387.1	420	279.5	336.7	288.5	325.9	377.8	378.7
266405_at	154.9	177.5	171.2	130.1	206.3	215.7	178.8	191.2	186.4	167.6	250.2	236.8	130.2	203	221.8	200	227.4	194.6
266407_at	836.6	888.5	887.5	524.1	491.5	840.6	815.2	860.2	883.1	508.9	680.3	613.9	711.8	792.1	665.4	546.2	612	651.9
266410_at	470.9	576.6	412	325.7	269.2	345.8	478.2	445.3	581.1	279.9	246.9	218.7	506.3	419.7	411.8	224	200.6	230.2
266411_at	458.8	474.6	433	578.4	488.3	577.2	490.1	468.2	542.2	498.4	444	560.2	480	405	354.7	445.7	436.4	445.4
266413_at	1018.8	769.3	762	703	691.4	736.4	642.9	692.6	620.2	921.7	1049.3	1306	1023.1	870	1241.2	745.1	865.9	1184.5
266414_at	650.7	731.4	626.2	817.9	795.4	795.9	702.3	683.7	674.9	643.9	693.5	675.5	1101.7	710.7	764.4	603.3	597.3	660.4
266415_at	1958.7	2145.8	2164.4	1777.2	2009.5	2139.6	1904.9	2045.8	2037	2171.3	1659.8	2310.2	2651.9	2362.9	2242.4	2065.5	2516.9	2871.7
266416_at	1421.3	1675.3	1557.5	1304	1246.8	1479.9	1439.5	1308.9	1524.4	1371.6	1402.4	1683.9	1888.3	1391.7	1700.5	1357.8	1614.9	1892
266417_at	1329.8	1937.6	1793.4	2280.2	2218.3	1906.7	1909.6	1858.2	1940.5	1793.8	1722.8	1491.9	1582.3	1642.9	1766.9	1680.3	1837.5	1366.6
266418_at	335.8	308.6	221	363.6	460.7	397.5	356.5	410.5	401.4	232.2	280.2	176.8	390.6	467.3	273.1	364.4	203.6	271.6
266420_at	659.5	637.2	524	436.7	429.4	453.9	699.1	715.9	643.3	441.8	429.8	500.1	943.4	762.6	815.2	658.6	417.4	686.5
266421_at	21883.1	23574.1	25859.4	24774.3	27177	31819.3	24649.4	22721	24003.4	23414	23133.1	27332.3	27415.6	23081.1	21833.7	22325.9	23426.8	26739.7
266422_at	518.4	565.7	439.9	336.1	335.9	398.5	551	633.3	560.2	396.2	405.2	380.2	590.4	571.8	610.3	313.4	329.9	395.5
266424_at	115.3	108.7	86.7	69.6	75.1	87.4	122.9	118.4	86.8	68.1	90.3	84.4	103.8	74.1	100	92.9	108	124.3
266391_at	181	217.8	183.1	209.7	163.1	175.5	193.3	226.1	236	120.7	139.8	150.7	160.6	158.2	169	135.1	149.9	248.5
266363_at	383.4	213.1	138.5	197.9	178.2	241.7	183.2	152	186.6	332.2	206.7	290.9	191.6	223.9	174.9	270.1	293	267
266365_at	297.9	265.8	262.3	220.6	214.6	203	234.9	236.9	285.8	315.7	288.6	340	297.3	295.4	343.2	182.8	316.4	349.7
266366_at	1291.7	1475.7	1473.4	1817.7	1539.4	1823.8	1589.7	1745.6	1341.6	1893.3	2084	2211	1388.4	1554.9	1818.2	2439	1705.5	2233.6
266370_at	410.3	291.8	276.5	298.7	299.5	343.6	254.4	311.7	246	363.9	330.9	301.7	334	324.4	283.2	279.4	311.7	379
266371_at	2012.8	1076.1	836.9	854.2	861.9	1225.7	2021.1	1909.6	1735.5	1741.3	1630.3	2398.3	2316.6	2667.1	2213.8	2212.6	1876.3	2068.8
266380_at	185.9	215.9	240.6	235.9	176.6	201.7	203.8	198.6	208	223	194	289.1	217.6	217	216.5	215.3	244.8	183.2
266384_at	127.2	203.8	240	221.7	252.2	205.4	183.9	186	219	208.2	225.4	128.3	67.8	107.8	120.6	157.8	131.3	108.5
266385_at	9201.6	948.7	366.1	2104.5	1529	1653.7	4754.2	2634.2	3801.6	8467	8671.3	10342	10151.5	9466.7	4729.8	9858.9	7365.9	3666.9
266389_s_at	122	159.5	207.8	257.9	132.1	120.4	222.6	210.7	189.1	196.8	216.8	177	254.5	172.9	201.8	198.2	167.7	260.2
266357_at	221.6	144.5	132.8	177.6	156.3	132.6	74.7	88.9	82.5	261.8	323.8	239	206.4	313.8	193.6	176.8	270.4	205.7
266358_at	198.1	140.5	191.5	155.6	195.3	169.4	204	297.6	262.2	277.6	210.6	220.8	210.9	151.9	251.2	233.2	173.9	157.4
266359_at	306.5	402.3	277.3	263.7	267.8	341.8	301.8	333.7	299.4	362	421	339.1	216.7	381.9	353.1	421.3	284.2	372.5
266361_at	140.5	119.1	129.5	121.5	112.2	112.8	174.2	163.3	128.4	120	133.4	162.1	90.9	152.4	107.1	147	98.2	145.8
266362_at	202.5	187.4	200.8	208.4	161.8	177.8	143.3	170.4	179.7	229.5	192.9	219.2	205.3	198.4	230.4	250.6	173.2	232.2
266333_at	77.5	86.5	126.3	137.2	121.4	94.5	110.6	101.2	115.5	111.8	120.4	125.3	77.9	96.8	144.5	133.5	111.3	118.8
266334_at	547.7	480.2	458.3	486.4	427.2	514.5	536.6	545.6	539.8	415.4	472.8	464.3	527	538.9	430.3	470.7	393.1	388.4
266335_at	279.6	348.3	322.3	368.6	346.8	289.2	270.2	206.6	365.5	402.5	376.3	331.2	248.9	304.8	261.1	315.2	341.5	311.3
266337_at	228.9	228.8	197	240.4	210.2	188.8	177.5	216.5	218.1	269.9	275.8	143.2	246.2	208.2	253.6	248.8	230.2	200.9
266338_at	200.9	254.7	256.1	197.9	223.6	191.6	263.6	271.5	277.7	186.5	261.4	179	264.2	274.1	189.2	248.2	194.7	209.8
266342_at	354.4	244.5	205.2	207.4	241.9	357	282.1	211.1	312.5	370.2	391.8	534.4	387.8	396.8	388.1	360.3	339.4	468
266345_at	576.8	549.2	419.1	316.7	320.2	344.1	471.1	424.3	499.2	385.9	331.8	312.6	539.7	507	551.2	354	338	488.3
266348_at	946	846.6	912.5	1169.2	983.2	1103.3	899.5	845.4	907.1	1050.9	1117.1	1154.5	1044.6	924.3	872.9	1146.7	1126.4	987.3
266350_at	403.3	385.6	420.9	419.8	500.1	438.6	387.6	432.1	399.9	559.4	593.6	475.9	461.3	429.1	464.7	617.3	556.8	521.9
266351_at	1710.8	1772.6	1704.6	1688.1	1850.8	2033.6	1600.6	1719.6	1600.4	1891.3	1825.5	1898.5	2451.7	2037	2017.5	2032.7	1877	2214.3
266352_at	133.9	164.6	154.7	97.1	122.7	137.8	135.9	155.8	108.1	214.2	136.5	207.5	259.9	270	291.7	199.6	233.4	202.9
266328_at	626.2	561.1	562.8	429	425.6	667.8	507.3	585.9	559.8	524.8	552.6	660.1	611	747.3	785.3	471.4	553.4	686.9
266329_at	1298.7	1625	1373.9	1587.3	1705.3	1840.5	1240.2	1136.1	1020	1406.2	1338.6	1554.7	1165.9	1197.4	1120.3	1164	1460.8	1454.8
266331_at	840.9	1059.1	947.2	959	674	662.7	1168.4	1149.4	1083.6	833.4	828.8	1138.1	1361.9	1207.2	1237.1	1027.1	874.5	1163.4
266300_at	948.5	964.7	1035.1	842.7	745.2	1066.3	814	891.5	856.1	682	704.6	937.5	1029.2	907.3	1201.5	665.8	693	858.5
266302_at	1470.2	1145	1131.4	847.4	981.2	866	955.8	1004.3	1094	799.6	823.7	676.9	1156.1	1223.5	1240.5	766.1	785.3	951.9
266303_at	561.4	524.6	595.8	470.2	344	379.6	346.5	375.3	410.6	286.7	329	291	393.3	371	301.7	400.5	212.2	326
266304_at	435.3	349.4	369.3	259.4	317.2	336.4	306.6	299.4	347.8	325.3	236.5	311.7	361.2	407	351.2	274.7	325.4	283.7
266306_at	286.8	304.1	250.6	263.9	263.2	316.5	314.2	301.3	295.4	291.1	313.5	462.7	299.9	322.3	391.4	320.7	260.6	423.4
266309_at	153.1	148.6	165.7	159.8	146.6	170	133.6	130.7	139	188.9	173.9	189.6	146.8	138.3	149.6	135.2	171.4	148.9
266310_at	362.2	448.4	353	325.1	373.4	402.1	356	443.9	340.5	366.2	344.3	286.9	292.6	379.4	404.5	392.6	370.2	407.1
266311_at	405.6	493.6	504.5	481.9	474	547.3	490.7	527.2	535.9	481.3	431.7	463.6	418.3	513.1	436.9	468.5	446.3	579.1
266312_at	4266.6	3533.5	3597.4	3956	3427.4	4166	3617.2	3926.7	4204.6	3860.7	3544.5	3051.6	3767.6	4199	3810.7	3127	4296.2	3636.3
266313_at	425.6	408.9	346.2	261.1	427	323.4	418.9	492.3	496.2	387.7	269.6	77.1	256.4	310.2	209.5	396.9	293.3	222.5
266314_at	696	816.7	956.8	752.9	734.9	839.3	681.6	714.3	885.2	537.7	462.9	492.2	758.5	644.2	720.2	572.6	627.6	537.6
266277_at	990.8	1303.6	956.7	1170.1	1407.8	1462.1	1073.9	958.5	1021.4	1210.7	1418.3	1046.4	906.4	793.4	857.6	988.7	1101.1	1101.2
266279_at	792.3	1563.6	1561.3	1082.8	1052.5	952.9	1003.9	1079.4	775.7	1117.6	1043.8	727.1	927.9	687.2	749.7	745.5	808.7	619.6
266283_at	451.9	357.2	393.2	377.4	358.3	338.8	458.7	401.2	416.4	370.5	336.8	262.8	284.1	383.5	360.6	395.3	284	337.9
266285_at	1232.5	1532.1	1529.4	1590.1	1844	1967.9	1402.1	1355	1288.6	1394.6	1394.6	1468.3	1102.7	979.2	940	1511.7	1418.8	1361.6
266288_s_at	408.7	402	395.9	252	283.4	321	531	493.9	509.4	309.1	304.2	263.7	323.1	389.5	518.9	339	307.9	342.3
266289_at	855.1	993.7	1266.6	1114.8	931.6	1086.8	910.2	859.5	911.1	939.3	954.5	899.6	790.9	781.1	864.4	856.7	816.4	901.8
266291_at	590	665.3	335.6	474.9	494.4	437.3	535.9	468.5	419.5	473.1	659.5	636	638.5	494	589.8	413	471.3	458.5
266293_at	627.4	918.7	798	930.4	1034.5	984.6	926.2	875.6	802.8	788.8	1178.2	1049.7	691.2	633.6	659.4	905.3	649.1	886.4
266295_at	900.6	1082.3	1428.1	1293.3	905.4	645	1083.6	1231.7	1046.9	929.4	812.7	766.7	799.7	648.3	739.2	815.4	814.2	689.6
266296_at	209.5	206.7	187.7	204.4	257.9	200.4	252.2	222.3	243.5	239.8	384.1	426.5	228.2	340.1	370.1	330.9	395.5	507.9
266297_at	860.6	1011.9	1030.9	966.5	991.7	1071	923.4	1041.3	1088.9	880.1	758.3	691.4	675.1	604.5	581.3	709.4	713.2	616.9
266298_at	211.3	165.6	187.2	204.2	227.2	284.6	203.9	215.9	191.7	218.9	246	294.7	179.1	197.5	229.2	232.9	306.2	242.2
266299_at	1283	1239.4	1263.4	1930.3	2222.3	1881.8	1512.1	1805.2	1328.2	1815.2	1847.5	1391.8	1113.9	1387.7	1005.2	1965.4	1832.4	1725.5
266265_at	764.3	741.4	554.3	837.3	932.5	884.6	821.2	787.7	896.6	642.3	694.1	745.1	755.9	648	534.3	1091.2	1033.3	836.9
266266_at	856.5	680	762.4	997.3	858.5	659	757.4	778.6	754.6	513.1	700.5	644.1	791	737.8	744	832	796.4	573.3
266237_at	327.4	491.4	436.1	348.5	493.5	468.2	420.3	619.4	634.5	389.1	305	292.7	320.8	269.9	309.5	392.4	364.6	284.6
266238_at	959.3	820	826.8	873.7	838.4	906	819.2	835.7	908.6	1018.3	1026.5	1343.9	1057.3	1024.2	1152.8	1042	1130.7	1171
266239_at	1322.8	1485.6	1438	1152	1593	1470.1	2015	1856.8	2017.9	1236.5	1196.6	1152.6	1387.2	1159.5	1115.3	1429	1342	1117.4
266253_at	1233.8	1639.6	1487.7	1889.8	1985	1429.9	1805.1	1844.7	1896.1	1101.5	1077.9	594.3	848.4	793.4	636.6	1345.7	1232.3	739.5
266254_at	637.4	758	641.1	673.1	700.2	536.3	738.6	828.5	795	607.1	569.7	490.6	660	569	587	538	536.2	387.2
266256_at	9357.1	9881.2	10219.2	11796.2	13672.3	10846.7	10989.2	10009	11028.4	9481.3	8277.6	6403.6	6599.9	6284.2	5464.4	9055.6	9575	6641.4
266257_at	676	771.9	763.2	516.6	648.5	776	795.3	808.6	678.6	615.7	604.8	505.7	893	679	712.7	633.8	629.8	585.1
266258_at	5811.4	7115.8	9064.2	7826.4	9411.6	9292.3	7300.3	7340.4	6123.4	6972.7	6972.1	5264.6	5112.1	4468.2	3964.8	7188	6678	4635.1
266260_at	1901.6	1653.2	1998.3	1524	1521.2	1536.5	1558.9	1613	1604.8	1467.4	1449.2	1596.1	1955.8	1794.5	1993.5	1325.1	1498.2	1283.8
266261_at	290.3	286.6	303	295.5	305.8	274.1	292.5	300.5	274.2	234.2	271.6	342.8	286.4	380.2	211.1	304.7	381.2	356.5
266262_at	298.4	277.5	309.4	254.6	202.2	307.8	249.8	343.2	268.7	193	279.3	326.7	223.7	250.2	195.5	270.5	168.1	273.3
266264_at	413.6	538.4	437.4	538.6	596	695.7	524.1	561.6	665.5	434.8	416.9	382.6	314.7	379.5	312.6	448.5	508	402.9
266205_s_at	5288.6	5256.4	5278.5	5055.8	5729.7	5411.6	5277.4	5287.2	5223.5	5296.8	5393.4	5452.3	5846.2	5992.3	5726.7	4903.7	5779.8	5872.1
266206_at	2036.5	2071.1	2560.4	2244.3	2785.7	2818.1	1957.4	2104	2231.3	2640.3	2646.1	3227.2	1891.7	2448.4	2541.2	2857.1	2602.8	3402.7
266207_at	4517.5	5507.3	5379.9	5901	6345.1	5983.3	4449.5	4341.9	4405.6	4835.1	5096.7	5101.5	4310.3	4393.2	4023.3	4853.9	4871.4	4871.6
266208_at	141.3	125.3	137.5	137.7	152.8	123.7	108.1	127.2	120.5	171.1	124.7	120.6	124.2	68.1	140.3	134.3	146.1	97.2
266210_at	6529.1	7704.8	7129.3	7501.3	9635.5	7531.4	8361.1	7946.6	9914.4	6526.9	6228.5	4698.7	5224.3	4653.3	4229.9	7093.6	6968	5066.1
266215_at	4087.8	4367.2	6049.7	4118.5	4595.5	4664.4	5191.6	5495.7	5336.4	3132.6	2801.8	2139.2	3775.9	2909.1	3592.9	4194.5	3452.3	3209.2
266216_at	340.7	504.7	430.8	536.9	600.7	397.5	311.9	329.6	393.8	502.4	443.3	482.6	398.7	384.4	451.9	516.7	444.8	428
266219_at	73.4	79.7	133.8	180.1	111.3	101.2	110.4	100.3	97.1	73.5	105.4	104.4	106.4	84	63.8	103	151.1	108.6
266221_at	231.6	261.7	243.6	243.7	179.2	224.9	153.9	202.3	146.7	254	223.6	307.7	226.6	175.4	159.5	148.3	232	203.8
266223_at	2237.4	2214.2	2327.7	2527.6	1508.7	2369.6	2311.8	2297.3	2735.9	2394.1	2231.1	2253.4	2079.4	1855.1	2212.9	1759.7	2462.4	2112.7
266224_at	5215.1	6329.8	6570.6	6337.8	6059.9	7666.6	5025.4	5147.2	4389.4	5680.7	6469.8	5151.5	4746	4857.2	4583.9	5260.4	5434.1	5151.8
266225_at	8142.5	9427.4	8746.6	10818.3	11282.1	12211.1	9236.2	9648.8	9176.4	13177.8	13573.3	14461.2	13446.1	11150.9	13562.6	11676.1	11687.5	13486.6
266226_at	579.8	633.3	633.5	676.3	694.5	689	709.2	777.5	650.4	684.8	633.9	466.9	294.4	372.7	324.2	625.2	573.1	363.8
266227_at	93.6	62.7	46	89.1	70.6	106.4	70.8	97.9	80.3	115.5	94.7	106.3	69	76.9	124.6	62.7	110.8	95.2
266228_at	1849.9	1656.1	2009.9	2206.1	2215.8	2822.1	2065.1	2014	1881.8	3301.8	2694.7	3725.1	1743.1	2449	2453.3	2862.9	3074	3457.5
266229_at	2592.4	2305.9	2089.2	2153.8	2302.1	2699.4	2182.2	2341.9	2475.1	2911.2	3276	3878.3	3709.7	3379.7	3880.1	2280.5	3064.6	3816.8
266235_at	331.8	248.7	176.4	243	259.6	343.6	191.7	235.3	225.2	369.1	337.6	340.5	294.7	311.4	322.5	248.9	274.8	318
266202_at	508.6	608.9	516.6	542.7	525.2	668	519.4	514.1	519.5	605.1	698.6	870.6	675.9	748.6	770.3	614.2	603.4	729.1
266203_at	164.2	161.4	150.9	175.9	154.8	183.2	149.2	192.3	163.4	139	124	141.7	129.3	194.2	189.5	270.3	202.2	214.6
266204_at	100.3	91.5	124.4	104.3	112.9	151.4	98.7	83.4	100.2	94.6	90.1	101.6	69.1	106.3	59.8	95	107.7	114.3
266175_at	265.8	310.1	296.5	315.4	309.5	298.8	233.4	236.9	249.9	348.9	414.9	335.4	242.5	317.2	342.5	291.8	280.6	305.9
266180_at	404.8	403.9	434.8	447.2	357.4	333.1	428.1	390.5	471.8	468.7	424.1	538.6	399.2	305.5	376.6	409.3	467.2	448.6
266181_at	1237.3	552.2	524.9	481	554.7	625.6	650.5	801.8	840.7	801.4	685.8	1320.6	847.1	1294.3	1102.1	975	980.2	1377.8
266185_at	423.6	408.1	354.6	436.4	401.3	421.9	356.2	402.7	429.4	365.5	371.2	405.8	387.9	515.7	413.7	374	345.8	376.3
266187_at	273.2	248.9	279.4	195.4	206.7	193.4	211.6	274.4	329.9	177.2	201	120.1	266.8	191.3	180.8	169.7	146.7	178.2
266188_at	580	559.4	428.2	452.7	524.2	599.8	557.7	591.4	542.4	651.4	683.2	950.2	718.1	867.3	1176.7	744.4	866.3	787.7
266189_at	636.9	510.4	547.6	615.2	659.1	640.6	713.8	740.4	864.9	510.6	591.7	508.3	484.2	661.1	563.3	717	620.8	565.1
266190_at	127.8	113.9	118	103.5	102.1	172.7	129.8	88.2	141.7	163.4	234.3	95.1	107.7	137.9	132.9	207.4	135.1	111.1
266192_at	1938.4	1927.7	1876.8	2029.2	2201	2441.9	1980.5	1979.6	1996.5	1364.7	1696.9	1421.8	1716.8	1599.3	1447.6	1831.6	1864.7	1450.1
266193_at	1037.5	1155.9	1046.6	1121.3	1235.1	1296.9	1139	1266.3	994.8	1054.7	935	813.5	1166.8	885.2	835.8	1035.9	1080.5	890.4
266194_at	113.5	131.3	148.8	145.1	129.5	193.6	133.1	129.6	136.9	135.3	172.5	199.3	143.7	140.1	167.4	155	215.5	179.7
266167_at	1078.6	582.2	748.9	769.3	1012.3	736.7	939.2	977.2	848.7	1041.2	1011	1157	850	972.4	1284.6	1247.5	965.2	1429.4
266168_at	1242.1	1124.5	1323.8	897.2	1172.4	1061.4	1334.5	1324.3	1460.5	1297.1	1278.1	1500.9	1777.9	2155.6	1768.8	1658.8	1934.8	2021.7
266170_at	448.6	290.5	330.2	421.5	368.8	352.5	319.5	394.7	359.5	422.3	495	629	931	981.5	813	613.4	746.3	784.7
266171_at	211.1	178.9	216.3	154.9	210.8	181.2	239.4	167.9	162.3	269.9	235.7	242.2	173.2	128.6	115.9	219.7	219.5	157.3
266172_at	7149.3	6717.1	6304.8	6618.5	6968.7	6858.7	8636.1	8522.4	8053.4	5910.6	6489	5559.9	9442.6	6894.6	7582.7	7377.9	7628.2	7710.2
266142_at	758.6	88.2	158.5	1664.2	1538	1861.8	2806.1	4112.9	3285.8	795.4	729.5	599.6	5115.3	8473.9	3611.9	7527.4	7385	6445.6
266155_at	143.4	84.7	99.4	76.7	86.1	69.8	133.3	133.3	163.6	174	170.5	101.6	105.7	140.8	137.5	112.7	128.7	107.4
266157_at	125.6	109.8	138.1	109.8	111.3	106.9	93.1	123.3	162.7	102.8	95.2	133.5	121.2	99.4	81.2	131.8	111.7	132.7
266158_at	268.3	255.9	260.8	417.6	279.3	366.8	220.7	294.7	307.4	313.7	302.7	285.7	302.2	234.9	314.7	212	198.5	245.1
266163_at	126.1	109.8	113.3	187.3	99.9	130.8	118.4	127.3	80.4	58.9	98.2	87.7	96.8	65.5	96.5	109.6	119.1	111.3
266165_at	6455.2	1363.6	1954.9	2854.2	1409.9	3205.4	3890.1	1792.3	3603.6	6944.5	6550	9573.3	6793	7795.5	4507.9	3671.8	5392.3	4771.1
266166_at	442.6	409.7	400.1	543.7	464.5	398.1	531.3	531	577.9	575.9	577.8	565	703.8	638.8	803.2	672.5	634.9	483.3
266138_at	495.5	464.9	520.5	458.9	553.4	498.6	429.9	431.3	434.8	529	560.9	518.9	471.1	369.1	455.7	615.9	574.9	564.9
266110_at	556	625.8	552.3	384.5	409	525.9	508.1	604.3	503.7	554.6	553.5	577.7	666.2	800.8	780.7	487.1	533.1	602.1
266135_at	222.2	233.4	209.7	154.2	248.1	214.2	247.8	181.2	281.5	264.9	418.3	148.6	170.5	191.6	199.5	149.3	128	193.5
266136_at	408.9	419.3	393.2	585.8	615.9	554.3	449.7	483.1	436.4	715.6	521.8	550.5	386.9	472.2	398.4	656.9	685.1	550.6
266137_at	837.4	712.1	630.8	662.3	739.2	665	726.8	765.8	784.4	839	766.7	820.1	952.3	727.4	880.7	659.7	758.4	673.5
266103_at	964.8	869.8	1079	700.6	888.6	760	842.3	805.4	682.8	879.5	894.9	1062.5	1041.7	1039.4	1115.3	1092.2	993.8	1084.3
266104_at	174	230.5	192.2	220	194.7	284.1	213.1	205.7	171.8	247	238.7	221.8	187.3	185.1	195.8	209.1	208.8	151.3
266105_at	2742.4	2150.2	2616.7	2358.8	2140.4	2646.6	2457.9	2339.3	2597.5	2717.9	2634.5	3319.8	2851.2	2779.3	2739.4	2024.5	2130.7	2555.8
266007_at	225.4	215.2	253.2	211	233.8	158.2	228.6	216.4	221.5	218	131.4	84.2	118.2	137.9	115.7	117.4	114.3	89
265952_at	512.4	653.1	471.6	606	621.6	588	642.1	652.1	603.2	705.3	743.7	670.8	631.6	642.3	670.3	791.7	740.2	709.2
265953_at	1046.2	948.4	999.3	1207.6	1249.6	1232.5	989.1	901	990.1	1365.7	1348.4	1404.2	1081.6	1290.1	1438.5	1369.3	1443	1782.5
265957_at	204.6	287	184.7	183.3	278.8	218.7	213.9	215.2	190.6	247.4	225.9	168.1	124	138	150.8	247.4	194.6	275.4
265958_at	972.8	968	958	1318	1242.3	1236.7	1127.5	1202.3	1250.4	1002.4	918.1	887.9	900	823.4	772.5	1045.5	1028	885.3
265959_at	1364.1	2541.9	1393.4	1386.6	1539.4	1208.8	1244.4	1186.3	1156.3	1622.4	1696.1	1756.4	1370.2	1450.9	1145.3	1170.1	1009.7	1707.8
265960_at	496.2	785.7	799.2	723.5	854.2	795.3	724.2	751	716.6	533.6	648.7	494	299.4	473.5	384.5	628.4	520.8	518.9
265961_at	313.6	535.1	524.9	600.3	613	623.3	574.7	636.3	638.6	535.1	479.5	486.9	303.7	410.4	360	655.9	599.8	545.8
265962_at	680.7	601	804	557.1	547.9	484.6	459.3	430.5	513	677.5	670.2	817.9	664.3	535.9	733.2	576.9	600.3	708
265963_s_at	12557.9	15923.7	17808.3	19098.4	16380.5	17535.2	18624.1	14847.6	16812.8	14115.9	13612.6	13025.6	12454.7	10193.6	10818.7	14315.5	13996.4	11153.9
265964_at	66.2	108.9	76.4	180.1	107.6	92.2	98.3	115.7	162.1	149.8	45.7	100.8	52	96.4	41.1	68.3	68.1	70.2
265965_at	649.3	909.6	865	807.8	886.7	864	777.5	802.1	877	547.5	724.3	505	650.5	632	598.8	676.5	726.2	575.8
265966_at	8818.8	11791.7	10972.6	12419.7	13952.3	12828.9	9436	9485.3	11352	13516.7	13046.3	11296.7	7517.6	7885.9	6752	14508.3	11202.1	9486.8
265967_at	710.6	832.2	745.3	899.9	826.5	884.4	656.3	714.4	674.4	735.6	714.7	780.8	816.2	584.9	621.4	641.4	658	516.5
265968_at	1834.9	2106.2	1670.6	1793	2126.5	1974.8	2108.3	2107.5	2257	2011.7	1767.1	1829.5	1928.5	1914.1	1864	2117.5	1937.3	1991.8
265974_at	359.2	286.8	304.2	367.5	312.3	272.7	204.6	216.6	324.9	335.5	363.9	317.3	302.6	297.9	351.6	439.6	273.6	319.6
265768_at	882.9	993.5	843.3	862.4	932.9	1226.7	991.6	772.8	1085.7	680.1	744.7	804.7	799.6	849.1	786	785.4	848.6	1027.6
265770_at	667.2	662.2	659.3	746.8	623.9	764.1	678.7	665.5	701	561.4	566.7	691.8	688.4	671.8	645.7	632.2	778.8	672.9
265771_at	282.1	209	224.1	208.1	238.5	239.5	193.6	193.7	196.9	233.2	207.4	214.8	176.9	222.9	231.4	231.2	230.1	224.2
266106_at	186.9	227.8	193.4	304	271.8	192	176.9	199	205.5	325.8	290.7	245.8	105.1	180.9	254.1	397.3	260.5	312.7
266079_at	816.4	877.9	1265.1	1369.6	1214.2	848.3	935.4	983.3	1090	967.3	944.1	669	779.3	694	792.2	1042.2	1048.5	749.5
266080_at	213.5	258.5	197.2	180	174.6	217	207.4	266.9	214.2	284.6	228.8	270.9	268.2	303.2	305.9	226.1	239	267
266081_at	155.7	162.6	169.4	145.5	97.4	138.8	153	186	167	128.8	88.5	146.6	208.7	170.4	189.9	133.2	121.7	123
266087_at	647.9	907.1	708.7	598.6	699.9	970	844.8	877.4	809.8	566.5	584.5	838.8	847	686	763	661.1	589.5	695.6
266089_at	880.6	669.3	764.4	889.4	897.9	799.6	883	895.4	921.5	1065.9	986.3	1202.6	1213	1147.4	1338.8	926.2	1011.2	1395.8
266090_at	294.5	273.4	248.4	389.2	260.3	401.2	323.9	300.6	285.8	403.2	383.3	615.4	461.6	438.4	484.5	398.6	408.5	544.9
266091_at	442.3	482.3	408.4	477.4	679.1	463	475.2	420.5	423.5	605.6	629.9	485.4	392.4	468.6	498.4	558.1	619	557.9
266093_at	1034.3	1394.3	1231.5	1286.1	1310.6	1464.8	1343.3	1370.5	1421.5	953	937.7	865.5	846.7	822.1	761.8	1077.9	895.9	786.1
266094_at	405.2	476.5	395.1	620.2	587.6	435.8	507.7	484.8	501.6	699.7	665.7	548.3	399.9	463.9	475.5	677.2	604.7	609.3
266095_at	281.8	223	231.4	282.5	226	226.1	294.4	294	244.7	270.3	284.9	264.5	345.3	293.7	272.8	272.8	299.6	261.5
266096_at	546.7	401.1	518	515.2	487.7	572.2	507.5	458.1	581.7	435.9	602.3	459.4	614.6	633.6	685.5	480.1	470.9	536.4
266097_at	639.2	322.6	314.6	419	569.9	502.2	626	558.4	542.1	647.5	606.5	721	570.2	690.5	776.5	700.2	955.2	938.4
266099_at	1451.1	1790.7	1633	1464.5	1480.7	1376.4	1321.3	1530.7	1405.3	1298.1	1342.4	1085.6	1200.4	1209.8	1322.6	1181.1	1263.8	1036.4
266101_at	1176.4	607.8	550.5	751	513.8	683.2	794.3	884.6	986.6	740.5	671.5	1254.2	1268.6	1106.5	1532.5	820.9	963	1294.2
266075_s_at	2766.2	2786.9	2651.9	1447.8	2226.7	1504.2	2743.1	3093.8	2545.9	2578.9	2480.8	2584.2	3521.1	2997.7	2787	2930.6	2880.2	2680.6
266076_at	169.3	153.1	168.4	230.8	209.4	240.5	198.4	249.8	242	240.8	151.5	175.4	89.2	163.7	121.4	229.9	141.1	137.9
266078_at	271.9	332.6	232.1	225.1	315.8	358.9	219.3	249.1	199.2	553	578.3	649.1	297	371	469.4	318.2	344.2	499.3
266047_at	140.2	171.4	161.1	143.4	92.3	197.6	166	137.3	150.7	128.4	143.1	148.4	136	131.8	152.7	156	206	125.5
266050_at	119.5	126	186.7	107.9	90.4	131.3	136.9	111.7	137.3	119.2	138.4	162.4	117.1	120.8	139.2	164.8	119.4	115.7
266051_at	702	746.9	663.6	642.8	554.7	701.7	589.3	700.7	748.3	587.7	526.8	383.9	441.6	457.5	422.1	568.3	401.6	370.6
266053_at	321.7	448.5	303.4	185.9	266.3	151.7	306.6	356.3	286.9	163.1	216.8	181.5	327.4	333.8	319.6	177.1	175.7	199.7
266055_at	197.5	137.4	220	198.3	192.7	223	171	177.8	192.1	222.5	180.7	215.3	123	186	155.5	231	166.8	188.5
266056_at	183.5	140.9	114.2	143.3	180.5	196.4	123.4	187.9	143.2	193.8	149.5	191.6	156.2	167.9	279.8	200.9	216.8	255.7
266057_at	854.4	1046.5	982.3	1023	1016.7	1068.5	1089.8	1182.7	1125.2	1040.9	907.1	1133.7	802.2	932.8	796.8	896.1	1015.7	851
266058_at	174.8	259.9	230.6	217.7	260.6	304.1	185.5	238.7	217.9	212.9	190.9	193.8	207.8	180.7	185.5	229.9	199.1	197.7
266059_at	1781.7	1635.7	1597.4	2218.6	2400.2	1301.9	2310.4	1327.4	1901.2	2076.9	1722.9	1482.1	1849.2	1288.8	1619.9	2005.8	2493.1	1520.1
266060_at	237.1	274.4	267.5	317.5	215	252.5	282.8	295.8	261	349.3	331.8	358.2	260	275.1	356.8	367.4	291.8	306.1
266062_at	424.9	432.4	462.1	625.1	711	626.4	606.1	596.4	694	658.3	588.8	817	500.8	671.6	757.7	909.1	873.3	704.8
266065_at	770.6	685.1	705.1	706.1	603.2	714.3	695.2	701.5	665.1	637.4	704.6	535.4	712	780.2	733.5	720.5	638.4	664.4
266070_at	1967.8	97.2	64.6	158.9	175	219.9	1255.5	923.3	845.2	1431.7	1348.2	2153.8	2001.4	2068.8	1807.4	1415.2	890.3	1007.5
266072_at	951.6	655.5	804.7	509.1	495.7	600.7	437.9	567.5	448.9	682.2	719.7	800.7	621.5	792.8	780.6	769.5	749.5	780.1
266073_at	320	394.5	317.1	434.8	435.1	458.6	438.4	376.1	460.1	538.8	471.7	428.7	363	373.7	401.4	357.6	429.9	375
266074_at	247.2	239.5	213.2	293.3	370.2	268.8	273.4	212.1	278.4	325.1	318.9	213.8	102.5	151	173.7	380.2	335.8	219
266018_at	1689.5	2264.8	2188.8	2976	2547.9	2682.2	2099.2	1960.5	1948.7	1420.6	1923.6	1593.4	1640.9	1646.9	1664.8	1590.2	2070.5	1600.2
266019_at	203.8	258.4	166.6	198.9	111.3	140.9	196.9	222.5	165.8	193.8	266.2	310.3	191.1	316.6	205.2	196.4	195	229
266022_at	2274.7	2486.7	2912.9	1890.7	1732.6	2104.1	2400.7	2514	2688.4	1627	1792.7	1848.6	2130.5	2266.2	2218.8	1700.2	1688.9	1684.9
266028_at	122.8	155.8	136.8	132.2	140.4	125	139.1	180.7	145	134.1	134.8	111.7	89.5	133	146.7	121.5	143.3	82.7
266033_at	1045.5	1276.8	1393.4	1475.2	1259.4	1626.5	1443	1218.1	1279.9	1242.5	1245	1126.5	1414.9	1098.5	1362.2	1134.9	1206.7	1276.8
266035_at	1884.6	2694	2376	2357.5	2600.6	2750	2150.8	2137.4	2192.7	1755.1	1572.3	1425	1484.3	1263.1	1295.9	1755.7	1877.6	1490
266036_s_at	2003.7	1930.1	1659.3	1669.8	1795.7	1592.7	2303.7	2069.6	1832.8	1733.4	1906.4	1795	2059.4	1876.4	1830.5	2058.8	2105	2027.7
266037_at	897.3	533	602.9	625.5	546.5	526.4	875.4	737.4	799.9	749.8	699.7	792.6	863.6	747.6	1001.8	732.1	856.2	854.7
266038_at	78.3	127.5	121.6	147.6	123.7	102.8	87.5	74.6	147.9	104.9	99.1	90.8	73.8	112	73.5	104.8	92.8	64
266042_s_at	93.2	116.6	126.9	108.8	72.4	90.6	92.9	102.2	105.4	75.3	64.5	109.4	123.4	109	90.9	67.7	19.5	75.5
266012_s_at	174.8	170.2	261.8	77	101.9	59.7	193	210.1	239.2	65	75.2	105.6	148.5	137	157	50.1	84.9	90.8
266015_at	130	122.3	152.4	181.2	264.5	128.7	115.7	137.1	122.1	206.1	191.5	182.9	131.3	146.8	149.3	182.6	152.4	124.3
265985_at	177.1	252.4	182.6	167.9	154.8	145	202.9	235.6	182.8	262.6	224.8	228.1	232.4	260.4	241.1	204.3	209.2	232.2
265986_at	186.8	218	244.8	165.2	148.3	198.2	189.4	217.8	211	124.6	178.5	181.8	169.8	155.7	127.4	125.4	159.3	136.3
265987_at	160.2	94.8	114.9	69.6	114.4	130.1	103.1	95.1	108.3	159.8	114.8	126.5	159.5	180.3	176.3	146.2	167.9	166.1
265990_at	615	597.6	493.9	549.2	421.5	428.4	520.3	512.9	534.3	633.6	676.7	693.9	622.5	724.4	780.7	538.5	542.5	538.9
265991_at	460.3	533.1	502.2	454.2	445.9	437.1	609.9	577	629.7	382.6	365.3	297.2	351	354.6	296.3	340.3	292	220.5
265994_at	291.5	289.8	209.9	288.9	264.3	422.2	357	301.6	311.4	313.5	408.4	370.5	284	325.6	324.3	335.8	255.1	298
265996_at	6469.2	5252.3	4972.4	5518.2	5915.2	5627.7	5848.2	5614.8	5509.5	6213.8	5680.3	6170.6	7258.3	8107.4	7007.4	6124.3	5907.8	7082.6
265998_at	4472.3	4879.2	4286.1	3779.3	3744.1	3386.2	4430.6	3997	4118.7	4334.9	4341.8	3912.6	5545.3	5290.8	5202.3	4055.1	3926	4330.8
266000_at	893.5	688.3	643.9	871.7	1166.1	883.5	747.6	691.2	847.9	1052	1186.9	1508	895.6	900.4	860.1	1159	1270.8	1295.7
266001_at	1476.1	1579	1564.4	1780.6	1264	1966.5	1787.9	1879.9	1814.7	1455.2	1427.1	1289.9	1816.8	1526.3	1470	1521.7	1388.1	1505.8
266004_at	189.3	212.4	298	144.9	145.4	161.5	207.5	207.7	144.2	224.1	200	244.2	259.2	218.6	276.7	203.5	174.2	303
266005_at	906.4	1147.3	1131.1	1336.5	1213.4	1197.3	1254.8	853.9	1368.2	1044.4	1083.5	1227.7	1054.9	818.9	946.7	961.9	961.1	1010.6
265926_at	69.7	64	47	107.2	76.7	61.3	85.2	64.5	60.6	73.4	110.3	68.7	90.2	70.3	79.6	97	89.7	102.9
265929_s_at	174.7	148	195.8	238.9	202.5	162.2	171.3	179.5	199.6	240	159.1	158.9	116.7	152.6	115	218.5	188	170.2
265930_at	488.3	616.7	538.8	472.6	450.7	643.3	502.7	589.1	568.2	395	568.4	609.6	572.6	480.7	494.7	403.3	427.5	542.8
265931_at	87.9	105.7	95.9	112	57.8	102.5	116.8	129.8	83.4	77.7	112.1	93.8	97.5	63.2	97.9	87.5	78.6	89.2
265934_at	208.5	288.3	192.4	179.3	218.5	226.7	249.2	229.9	212.2	183.6	235.2	193	192.8	191.7	218.4	194.2	283	279.1
265935_at	211.1	94.4	146	149.2	169.8	195.7	158.7	156.1	161.8	192.5	216.7	215.4	190.7	154.9	183.5	121.8	112.1	160.7
265936_at	305	267.7	281.5	270.5	226.3	274.9	213.2	248.9	252.1	229.9	273	310.7	280.8	253.4	281.2	290.4	277.2	243.8
265938_at	258.5	276.7	317.8	408.5	416.1	344.9	303	380.3	315.9	337.7	299.9	424.3	290.8	237.3	346.5	398.2	331.2	335.1
265939_at	224.9	183.3	170.2	171	199.6	165.1	162.6	160.2	177.7	197.7	255.3	249.3	284.9	255.4	254.5	234.1	164.1	242.7
265940_at	1805	1595.3	1676.3	1769.3	1805	1813.9	2144.5	2034.1	2087.8	1717.8	1715.4	1524.9	1202.6	1676.8	1271.9	1979.6	1704.8	1588.1
265941_s_at	104.6	135.9	124.8	115.4	66.4	96.8	126.7	142.3	135.8	102.4	94.3	93.7	50.9	86.8	60.2	86.7	93.5	85.1
265942_at	597.7	475.3	475.8	545.7	585.1	570.7	466.5	556.9	568.3	682.6	623.8	769.5	605.1	556.5	540.4	668.9	508.3	622.1
265943_at	416.4	359.3	394.8	283	292.3	269.1	351.6	341.9	272.5	409.5	412.7	403.7	435.2	358.1	457.3	359.9	367	353.1
265946_s_at	955.6	1211.7	1101.4	706.6	944.2	555.6	1003.1	989.3	1073	917.2	920.8	804.9	676.1	926.7	794.5	1049.6	908.6	756.7
265947_at	1274.4	1616.7	1355.8	1353.3	1358.4	1504	1701.8	1785.6	1930.3	1063.1	1003.1	972.7	1330.7	1333.5	1048.8	1171.8	1279.3	1181.5
265918_at	1183.8	1289.2	1390.1	906.8	1015	894.5	1129.7	1166.5	1275.1	817.9	884.3	553.7	813.6	655.5	642.8	782.8	731.3	649.3
265894_at	2123.8	2407.9	2140.3	2149.4	2560.1	2865.3	2512.9	2474.5	2462.8	2387.8	2362.7	2673.8	3015.3	2970.1	2777.3	2119.6	2515.7	2946.3
265895_at	538.3	496.9	649.5	786.2	548.2	718.4	777.3	624.2	732.4	396.3	372.2	306.7	313.3	405.1	306.3	530.1	505.3	318.9
265896_at	306.5	332.5	306.9	402.2	326	423	284.5	237.2	310	267.5	277.2	288.4	294.6	252	260.6	286.7	254.5	235
265899_s_at	129.2	118.2	107.5	162.2	215.9	173.7	89	127.6	118.8	147.4	148.1	131.6	126.6	122.3	118.3	134.2	176.1	168.8
265900_at	563.6	566.3	576.4	426.1	340.5	280.1	447.6	452.2	578.2	445.9	416.1	446.5	569.5	509.6	547.6	351	334.3	342.2
265902_at	119.2	73.8	102	133.9	201.9	133	88.6	95.2	102.9	248.6	207.3	218.9	164.1	182	182.2	229.7	233.2	273
265909_at	169.3	203.6	238.9	188.1	213.3	221.7	232.1	239.7	242.9	224.7	340.5	263.4	226.7	273	287.4	289.6	243.4	258.7
265910_at	2034.9	2050.1	1984.1	1725.7	2038.8	1987	2128.6	2249.5	1581.6	1784.6	2012.1	2234.2	2262.7	2188.7	1996.3	1984.2	2171.2	2370.3
265911_at	718.1	695.2	691.5	585.6	601.4	635.9	671.5	633.5	620	473.9	485.1	504.5	474.7	506.1	527.3	568.1	491.1	438.5
265912_at	365.7	375.4	491.1	409.3	456.9	562.4	343.3	455.5	456	448.4	524.3	492.6	537.7	491.4	494.1	435	532.6	570.3
265886_at	228.7	256.6	352.2	208.9	227.3	265.9	227.8	256.4	316.1	217	197.8	194	220.4	264.2	195	239.6	281.2	281.3
265887_at	562.5	531.3	719.5	846.8	782	753.3	589.3	605	606.9	765.4	708.8	645.5	589.1	588.2	581.9	655.7	729.2	679.6
265858_at	2902.4	2631.4	2748.9	2563.7	2205.9	2912.6	2679	2891.1	2861	2376.7	3092.3	2708.1	2938.4	3097.5	2829.3	2686.5	2683.9	2808.1
265866_at	402.8	391.8	336.6	292.2	283.7	281.4	413.8	385.8	370.2	362.2	332.6	455.8	470.2	372.7	425.1	333.1	314.4	405.8
265867_at	1299.1	1286.2	1427.3	1246.4	1279.3	1483.9	1250.1	1152.4	1195.2	1349.1	1274.1	1236.9	1882.1	1472.9	1450.3	1161.9	1399	1100.4
265868_at	590.3	319.4	360.6	288	320.1	372.3	403.2	361.2	414.2	427.6	566.9	449.6	535.4	515.4	555.6	392.8	466.2	547.1
265869_at	301.2	370.2	412.8	317.3	300.4	273.1	297.1	364.8	280.2	280.6	302.6	306.2	319.6	297.5	377.1	279.1	282	281
265871_at	554.3	358.6	354.9	336.6	377.9	373.3	411.3	408.4	369.4	443.4	564.1	674.3	510.4	621.8	625.2	390.7	497.4	544
265872_at	1430.3	1233.7	1010.9	935.6	1027	884.9	1356.5	1516.8	1089.7	1177	1170.8	1161.4	1411.2	1397	1432.4	1361.4	894.8	1115.1
265873_at	223.6	307.4	259.7	248.7	175.2	211	264.9	224.7	232.6	201.4	180	216.3	199	201.6	171.3	196.6	146.7	116.5
265874_at	259.6	351	273.8	258.1	266.2	356.3	298	311.8	358.1	285.7	269.2	195.8	189.9	243.8	241.6	301.8	248.8	258.1
265875_at	312.1	236.3	314.1	230.6	269.8	310.6	236.7	245.6	263.8	282.9	380.2	284	235.9	329.4	304	337	397.7	327.9
265879_at	152	260.5	279.7	216.9	208.6	152.5	288.6	241.9	305	259	229.2	143.2	206.8	236.7	160.9	216.2	178.9	182.4
265880_at	336.7	326.1	258.7	255.3	303.5	290.2	356.1	302.5	274.3	291.1	321.1	319.8	227.5	317.7	307	289.9	253.5	297
265882_at	733.6	650.9	714.3	912.7	828.4	781.5	832.9	813.2	836.1	784.5	735.2	851.1	786.7	653.7	785	704.1	759.9	663.8
265883_at	3314.3	2969.6	2917.1	3349.6	3777	3592.9	3613.7	3062.6	3310.8	2972.5	2903.7	3222.8	4433.1	3431.5	3558.6	2991.5	3325.3	4098.2
265884_at	1037.7	1207	1208.1	1106.8	1258.6	1106.5	982	1106.7	1024.4	1232.1	1098.3	1101.4	1208.6	1102.2	1040.7	1236.2	1338.1	1147.6
265855_at	488	628.4	628.2	735.4	653.2	551.5	590.6	575.2	640.7	815.2	887.2	993.1	731.4	848	1109.4	833.6	722.9	1021
265857_s_at	1265	1637.9	1526.9	1111	1500.3	1304.1	1716	1650	1518.9	1019.4	1577.2	1130.9	1447.5	1509.8	1418.2	1241.7	1460.7	1441.8
265827_at	188.3	160.3	125.1	210.1	134.3	210.3	158.1	181.7	219	208.9	191.9	222.1	221.5	199	242.1	191.6	156.2	206.2
265828_at	73.9	109.5	129.9	103.8	119.8	166.4	96.3	109.4	98.3	135.2	130.6	176.6	89.5	95.2	135.6	122	173.4	130.4
265831_at	352.5	431	344.6	596.7	531.2	657	481.7	421.8	366.4	677.4	600.7	651.4	318	233.7	284.6	669.8	588	514.8
265837_at	6309.5	1488.6	1486.8	2409.8	2601.8	2808.2	2034.7	1541.7	1976	6930.3	8513	10014	5115.3	4896	6823.7	4258.5	3659	7208.3
265840_at	248.4	259	192.4	260	279.9	288.3	279.5	257.3	234.3	210.3	226.8	223.8	213.8	218.7	203.5	196.1	251.7	275.2
265843_at	294.8	284.9	327.4	279.9	276.8	256.9	239.6	245.7	269.6	300.6	266.4	201.4	260.4	268	201.1	258.8	216.3	241.5
265844_at	364.6	458.8	367	604.4	643.9	708.5	350.2	340	339.7	673.4	753.4	676.6	318.2	444.9	419	725.9	663.2	746.1
265845_at	360.2	362.3	393.6	290.3	335.2	354.9	402.4	401.2	370	354.9	409.1	356.3	489.2	416.1	381	328.5	324.7	454.5
265847_at	224.8	272.2	292.8	134.6	342.9	256.9	272.7	259.3	325.6	246.7	215.5	235.6	164.2	238	197.4	230.9	279.9	256.3
265849_at	95.2	108.3	82.9	144.3	193.7	118	113.7	93	141.6	120.5	138.9	127.6	128.5	88.4	127.4	138.5	137.3	128.7
265850_at	240.1	236.6	190.1	240.5	200.2	287	241.9	215.5	259.9	267.1	262.4	178.1	163.3	230.3	176	269.9	193.2	188.3
265823_at	172	126.3	146.5	159.2	149.4	212.5	180.6	185.5	214	224.4	244.7	376.9	324.6	315.4	495.2	158.9	274.7	390.8
265824_at	414.1	488.4	398.6	476.9	409.4	366.5	455.5	381.4	358.1	477	457.5	405.1	448.9	342.5	356	382.5	395.3	339.2
265825_at	959.4	950.6	828	1100.1	1298.7	939.8	1098.8	978	898.7	1336.1	1302.6	1092.5	849.7	925	989.3	1412.3	1116.2	1258.4
265826_at	628.7	593.2	553.2	795.4	746.7	955.3	717.9	638.5	678.3	570.3	638.3	817.9	665.6	585.2	640.3	766.5	711.2	875.2
265795_at	2103.1	1888.9	2085.2	1822.9	1901.1	2180.2	1914.7	2026.1	1894.5	1786.4	1681.2	1357.9	2067.8	1976.7	1829.6	1614.1	1632	1618.3
265798_at	656.8	751.8	734.2	1002.7	939	835.2	801.8	866.6	757.2	681.7	483.2	616.4	566.6	684.3	509	876.7	717.5	620.5
265799_at	807.2	724.4	567.3	848.9	986.6	736.8	706.1	484.4	665.3	988.2	982.9	1415.4	875.6	1128.4	1277.3	882.8	983.1	1378.7
265800_at	424.9	599.5	592.7	508.2	471.7	415.8	451.8	415.8	538.9	374.6	399.5	352.2	483.4	529.7	486	339.1	405.6	359.7
265804_at	328.7	334.8	349.2	273.9	247.2	266.6	413.1	306	389.1	207.5	351.4	341.7	302.1	337.6	330.5	289.9	292.7	393
265805_s_at	19892.9	20781.3	21895.5	24000.3	21919.4	24593.4	20728.7	19350.7	20764.9	19867.6	17950.4	16394.1	19072.7	14829.2	15002	17335.3	18170.3	16591.7
265807_at	301.9	259.1	276.5	353.8	301.6	236.6	303.3	293.1	261.5	379.6	381.3	415.1	258.1	370	368.2	389.6	356.7	401.5
265810_at	297	265.6	316.6	238.6	208.8	208.4	283.1	267.5	279.2	334	175	193.1	295.8	285.5	370.2	207	243.7	212.4
265814_at	761.9	745.6	668.2	472.9	502.9	531.7	613.2	653.8	587.4	710.2	536.6	639.4	780.6	619.1	783.8	377.9	532.6	469.4
265815_at	111.6	133.3	96.9	145.1	152.3	173	112.4	111	106.5	154.5	166.7	173.2	138.6	105.7	113.8	181.3	201.8	173.5
265816_s_at	4459.7	8035.3	6526.4	7083.3	7168.7	9238.2	7012.9	6193.7	5574.8	6446.4	6449.4	7713.9	5358.7	6561.5	5184.9	7464.4	4859.1	4887.5
265818_at	2385.6	2325.6	2348.2	1782.4	2126	2534.5	2521.8	2728.5	2364.5	2504.3	2432.7	2405.3	2439.3	2374.8	2684.1	2178.6	1838.6	2510.7
265819_at	958.1	1341.7	1351.1	1440.8	1865.8	1442.7	1401.8	1321.5	1203.6	1372.8	1428.1	1114.2	824	980.1	846	1561.3	974.3	1228.8
265822_at	642.8	575.4	490.7	452.9	505.6	504.3	569.9	627.3	613.4	580.6	621.9	603.9	621	588.3	893.2	462.5	516.7	606.8
265773_at	2048.5	2327.4	2313.6	2509.6	2303	2624.9	2286.8	1901.6	2214	2043.8	2061.7	1729.8	1649.6	1841.6	1705	2222.7	1961.6	1674.2
265776_at	254.2	295.3	255.1	327.6	353.3	289.6	284.4	257.2	272.2	260.5	284.6	273.3	124.4	183.2	142.3	306.5	334	242.9
265777_at	612.4	866.9	880.8	1021.9	881.2	1069.6	922.8	889	1007.6	880.5	770.2	874.8	640.2	638.7	677.6	848.6	883.1	837.6
265778_at	1096.7	1008.9	1178.4	984.2	715.2	802.6	1017.5	1013	1055.8	968.3	898.1	909.4	1213.7	1156.1	1068.4	776.5	845.4	829.4
265779_at	475	428.4	400.1	167.6	169.4	199.4	355.9	396.4	316.7	213.3	249	188.4	402.4	470.2	474.7	164.6	178.9	206
265642_at	1223.4	1124.8	984	1255.2	1385.8	1360.7	1306.2	1233.4	1313.2	1189	1330.4	1476.5	1227.5	1205.7	1333.4	1184.3	1375.9	1615.6
265646_at	292.8	284.1	237.5	257.6	214.9	283.7	297.8	306.4	300.9	229.9	242.2	274.2	377.4	320.3	296.9	213	251.3	303
265648_at	231.7	212.3	348.5	274.2	332.9	215.3	302	305	364.8	321.3	333.9	185.8	296.2	217.1	206.5	279.8	222.1	222.4
265649_at	636	866.5	915.1	646	779.6	769.1	886.8	838.9	882.8	665	641.2	614	657.6	628.7	623	666.3	620.5	644.9
265650_at	384.5	348.2	438.7	367.2	348.6	474.6	390.5	406.2	466.5	356.1	416	379.3	437	417.2	441.5	339.6	386.8	352.5
265656_at	620	580.9	678.9	360.8	468.4	436.6	629.9	491.6	528.2	360.1	314.3	397.4	308.5	309.1	351.1	387.3	283.5	369.5
265657_at	214.3	238	193.7	214.5	190.8	255.3	243.6	243.2	250.1	215.2	228.9	231.4	189.5	219.5	277.3	171	247.3	307.5
265633_at	1454.7	1017.5	1065	717.7	821.2	965	1225.3	1087.3	1149.2	1019	1009.5	1217.3	1284.7	1742.6	1590	809.9	902.6	1312.6
265634_at	102	92.5	119.5	130.2	116.4	129	109.3	115	127.7	118.2	117.8	136.7	114.4	96.5	105.8	99.1	116.4	146.1
265609_at	120.2	81.5	144.3	93.8	126.5	81.1	96.6	118.2	112	127	128.1	130.9	110.7	109.8	108.3	79.1	86.7	108.2
265610_at	897.4	917.1	903.5	512.9	598	527.8	1091.4	907.2	888.3	614	550.4	591	894.3	1178.9	1095.4	615.5	545.3	795.2
265611_at	33719.9	20208.8	19521.8	25738	28033.4	24447.9	20211.7	18270.1	22401.1	36558.1	34640	36441.2	28702.8	26666.5	27252.1	27301.2	25817.8	27927
265454_at	94	107.7	82.1	116.6	101.7	59	71.2	81.8	90.2	150.9	113.8	109	110.8	80.1	115.1	91.2	110.9	133
265455_at	587.1	515.4	543.7	487.5	295.7	230.2	539.4	507.4	432.8	590.8	507	400.8	527.7	567.4	489.9	445	299.9	369.4
265456_at	1726.4	1741.8	1582.3	2090.8	2281.3	1274.1	1922.3	1771.1	1926.5	1751.6	2046.4	1510.5	1587.1	1427.7	1644.1	2111.2	1839.3	1595.5
265457_at	772	779.4	689.1	702.1	743.8	725.5	585	612.7	547.9	776.4	855.8	871.8	899.4	853.1	968.8	880.8	903.5	1061.2
265458_at	605.1	630.2	565.1	775	686.5	751.8	563.6	562.8	623.1	744.8	786.5	680.1	770.8	702.7	648.5	752.5	781.8	837.6
265459_at	3076.7	3225.9	3265	3418.5	3547.9	2580.5	3217.3	2816.6	3160.4	3088.7	2897.5	2926.8	3064.9	2953.6	2772.1	3230.1	3084.3	2701.7
265790_at	806.7	869.5	773.8	986.8	698.2	830.2	807.9	829.4	845	727.3	996.2	1171.7	886.3	1028.5	920.4	874.5	798.8	984.2
265793_at	379.6	493.1	427.5	475.7	561.5	488.5	405.9	458	453.6	542	466.2	580.4	418.7	418.8	428.9	453.2	606.4	514.5
265760_at	546.5	376.8	397	501.3	680.8	466.6	382.3	458.3	438.3	587.1	577.9	564.4	432.1	361.5	471.3	678.1	682	667.2
265761_at	132.3	91.5	84.7	116.1	148.2	169.3	91.7	127	108.2	177.7	120.2	124.7	109.4	120.1	127.8	135.8	155.2	160.9
265733_at	396.3	245.2	205.3	215.3	191.3	178	318.5	269.2	283.3	219.6	165.3	186.7	327.2	211	298.8	171.2	192.7	238.8
265734_at	438.1	326.3	303.7	361.1	311.4	288.9	363.3	315.6	284.4	427.6	386.8	418.5	377.7	406.1	415.9	455.8	383.5	340.6
265735_at	1599.6	1648.2	1823.9	1545.7	1482.7	1761.7	1783.5	1701.4	1797.9	1256.6	1197.2	1484.6	1687.2	1835.8	1852.5	1576.8	1602.2	1693.5
265736_at	11981.8	12065.4	13037.8	13766	14853.2	15563.3	13303.2	12186.3	13063.4	11048.5	10519.2	9434.2	9572.2	8478.4	7342.5	11691.1	10579.5	8973.4
265738_at	1618	1470.9	1332.1	1969.2	1945.1	1905.6	1398.6	1454.8	1531.4	1920.9	1918.1	2024.3	1602.5	1652.5	1873.3	1844.9	2551	2280.4
265739_at	660	780.1	882.2	844.4	761.3	636.6	794.3	863.2	930.5	821.7	774.1	729.5	933.1	901.3	1019.4	743.5	791.5	620.1
265740_at	302.8	376	392.5	246.9	290.5	285.2	309.3	382.6	382.5	303.5	339	339.1	400.6	387.9	503.3	335.1	323.8	528.4
265741_at	926.7	1101.6	1056.8	977.1	1033.3	1121.7	944.6	986.5	1001.9	1029.5	838.2	893.6	1135.5	1067.7	869.2	907.6	901.3	751
265742_at	1256.1	1242.5	1233.2	1193.8	1160.7	969.6	1225.1	1156.6	1283.1	1241	1112.5	839.4	964	1092.2	1038.9	923.8	792	679.3
265759_at	737.8	645.7	556.8	633.3	507.6	698.9	678	667.7	729.6	682	649.2	804.5	748.4	859.5	885.4	597.7	841.1	883.2
265699_at	1035.8	920.3	816.4	661.4	822.8	728.7	769.9	733.8	685.3	978.9	1063.4	1099.5	959.3	986.5	885.9	858.9	902.9	821.5
265700_at	467.2	344.9	390	359.4	366.1	320.8	340.9	375.6	394	429.5	482.8	421.5	385	444.6	517.5	374.1	452.6	472.2
265702_at	108.3	87.4	70.3	81.4	78.5	84.9	112.9	100.6	106.7	74.8	68.2	93.3	99.8	101.5	130.5	76.5	100.9	64.9
265703_at	307.9	304.2	332.8	576.4	410.2	417.6	280.7	283.1	326.4	435.2	328.3	533.8	330.2	372.1	408.4	399.9	374.3	531.9
265704_at	2312.7	3214.8	2581.5	3138.9	3197.7	3100.1	2828	2726.9	2707	2816.9	2967	2673.5	1875.4	2257.5	1840.1	2696.7	2360.6	1797.7
265706_at	347.5	422.9	275	329.7	412.9	365.3	349.1	302.3	278.2	415.8	429	354.2	257.6	417.9	275.6	413.6	382.6	418.6
265707_at	1033.6	1348.4	1188.2	2554.6	1640.2	1621.1	1111.9	1109.1	1136.9	1273.5	2005.4	1713.9	1671.5	1400	1637.7	2043.5	2050.3	1875.1
265712_s_at	866.7	1320.3	935.9	964.3	1127.9	934.4	959	1026.1	959.7	1381.9	1313	1180.2	1035.6	1240.7	1218.3	1225.2	1279.3	1258.3
265715_s_at	389.6	472.7	482.4	457.6	345.3	360	420.5	521.7	519.9	463.3	421.6	428.9	444.1	471	480.3	376.6	518.6	479.2
265716_at	654.8	769.4	814	984.6	989.3	771.1	802.5	606.4	693.2	736.1	659.2	791.4	736.4	612	694.9	804.4	721	762.8
265717_at	1797.2	1181.7	1338.8	1291.2	1389.8	1138.1	1274.7	1367.4	1345.9	1844.7	1487.4	1451.4	1480.6	1447.6	1527.9	1573.5	1462.2	1511.8
265718_at	357.3	346.9	342.5	305.2	268.2	286	361.3	371.3	397.2	396	468.6	433.6	413.7	502.3	478.1	370.1	335.5	417.5
265720_at	149.2	120.4	116.8	102.6	164	154.6	112.5	113.8	133.2	227.3	199.1	268.2	162	196	158.1	201.1	190	245.3
265721_at	329.7	311.2	372	361.9	347	406.5	305.8	388.9	350	259.4	240.2	217.5	232.2	243.5	245.2	271.3	258.2	238.8
265722_at	7998.7	9129.6	7598.7	4179.9	7555.8	6975.3	6408.5	6109.6	5901.8	6285.3	7921.7	7490.5	8211.1	7570.2	8636.7	5445.3	7075	6993.3
265724_at	584.4	774.4	940.8	531	423.4	499	487.8	583.6	551.7	524	529.3	521.5	480.4	531.4	559.6	457.4	356	432.5
265727_at	197.7	234.9	221.3	257.4	260.4	190.2	188.2	216.4	209.6	245.3	171.4	193.6	253.9	168.1	183.2	213	221.3	163.8
265729_at	358.4	374.8	437	341.3	392.1	308.5	315.2	293.6	315.5	394.6	347.3	294.9	355.9	296	492.7	280.2	373.5	398.3
265730_at	447	648.6	616.3	468.1	514.6	477.5	638.8	690.2	593.4	425.3	341.9	273.9	398	339.4	325.4	456.4	346.5	265.7
265697_at	779.5	813.6	784.3	946.2	993.3	854.4	813.2	852.4	819.6	879.3	891.1	753.2	873.2	785	803.7	859.8	994.9	859.1
265698_at	1148	466.9	386	434.7	374.6	332.8	426.2	340.7	352.9	1327.6	1263.4	1533.2	840.4	870.5	1123.1	638.3	648.4	876.9
265669_at	784.6	719.7	733.5	1035.8	937.2	946.7	699.8	721.8	734.1	885.5	941.7	1040.5	719.4	689.8	685.2	844.4	817.4	747.3
265670_s_at	49.6	47.5	58.5	46.5	51.5	33.3	79.8	75.4	77	86.5	96.2	96.8	64.7	72.5	50	144.9	169.8	93.5
265671_at	4623	4535.6	4603.2	4930.4	5038.6	4170.5	4890.7	5199.3	5804.6	4202.2	3817.7	3029.9	3526.3	2690.6	2307.5	4823.6	3547.8	2474.8
265673_at	1218.3	1137.9	1000.3	794.8	1071.9	708.8	1091	1056.1	1039.9	1088.7	1039.9	1065	828.2	1168.9	1310.6	1200.2	1308.2	1305.3
265675_at	92.1	128.9	104.5	100.2	150.2	101.4	88.6	97.3	82.6	108	90	109.3	125.6	50.2	87	96.6	81.8	103.2
265676_at	873.6	892.3	945.6	735.1	989.1	674.9	847.6	973.6	892.3	846.3	817.1	902.6	935.4	742.9	925.2	878.4	935.8	932.8
265677_at	963.6	891.8	871	576.6	748.8	743.2	1033.2	1047.6	1060.5	950.2	917.8	933.8	1019.7	1098.8	1078.5	971.1	936.1	821.9
265678_at	151.3	207.9	239	214.9	182.2	165.9	180.4	186.2	215	164.4	184.3	176.9	143.2	196.1	192.2	171.6	244.8	137.3
265679_at	961.3	601.3	676.7	600.4	492.5	607	721.6	748.1	818.3	669.4	605.6	664.6	778	832.1	987.6	782.7	674.8	698.2
265680_at	540.3	254.8	198.6	348.6	374.1	420.6	360.8	486	420.4	454	395.4	742.3	656.7	813.5	807.6	634.7	812.5	1087.5
265691_at	383.2	285.7	281.8	355.9	291.1	414.3	311.5	364.2	296.6	339.2	341.9	399.5	279.6	340.6	316.6	345.5	331.5	397
265694_at	150.1	133.5	166.1	188.8	191.2	139.3	125	160.6	153.2	154.1	113.5	158.8	130.7	114.9	120.9	155.9	194.8	144.6
265695_at	479.2	663.9	610.6	384.2	347.4	382	373.4	417.4	416.3	437.3	376.8	270	341.5	288.9	284	393.5	312	307.6
265661_at	1092.5	761.5	782.6	790.9	640	612.8	969.6	885.9	891.4	903.8	980.4	1280.6	1459.6	1418.6	1597	1040.7	1039.2	1266.2
265662_at	1094.2	1015.5	1022.5	1278.2	1153.1	1016.8	1179.6	1251.9	1249.6	1105.5	1000.3	915.9	881.8	873.4	891.1	1084	1006.6	875.4
265663_at	370.3	421.6	485.2	414.6	568.4	495	411.7	468.7	426.4	570	438.3	405.2	497.6	464.4	526.7	470.9	511.6	600.9
265664_at	1614.1	1462.2	1395.9	1257.3	1231	1352.5	1409.6	1350	1399.7	1560.6	1765.5	1591.5	1803.1	1893.9	1835.4	1389.4	1618	1856.1
265637_at	304.8	300.7	268.3	331.5	227.9	283.6	288.3	306.9	333.9	287	359.9	400.9	329.1	314.6	371.2	298.3	287.8	384.4
265638_at	137.1	115.8	120.7	141.4	160.1	143.3	141.4	83.3	153.6	184.3	172.2	127.5	122	101.5	133.6	151.4	147.3	76
265641_at	288.5	259.4	298.7	409.7	367.8	331.1	267	293.5	163.1	259	310.4	232	237.1	210	198.5	316.1	299.8	218.9
265613_at	394.8	228	237	307.3	298.2	334.5	306.2	342.4	286.8	382.9	266.6	272	300.7	273.3	324.8	285.3	205.4	250.5
265614_at	247.8	313.2	322.4	372.1	294	463.4	340.5	362.5	333.3	380.2	285.9	314.7	307.1	280.3	230.5	302.3	349.5	290.7
265615_at	6478.7	6226.9	6790.5	6964	8517.8	7946.6	7025.9	6272.2	6476.4	9381.6	8231.9	7735.3	6258.8	6908.5	5948.1	8347.4	7000.8	7596.5
265617_at	1873.4	1266.3	1014.5	1407.9	1326.7	1407.4	1479.1	1754.7	1740	1889.7	1826.6	1949.8	1859.7	2242.1	2221.7	1831.5	1796.9	1931.6
265626_at	594.1	584.1	617.4	777.9	699.8	487.7	711.4	728.7	848.1	752.3	745.1	617	687.5	876.2	764.1	753.4	822.1	575.4
265627_at	397.2	351.1	416.6	451.5	471.2	439.1	346.5	320	309.2	476.1	508.7	596.3	385.5	450.7	485.6	436.3	483.7	506.5
265628_at	2100.6	2318.5	2054.1	2424.1	1865	2666.4	1857	1709.5	1682.4	2200	2705.7	2919.7	2489.9	2070.2	2073.4	1857.1	2528	3062.3
265629_at	383.4	412.1	454.2	532.3	524.3	564.9	463.6	460.7	442.7	572.9	463.5	519.4	434.7	531.6	458.9	566.1	571.2	554.6
265630_at	366.9	343.5	380.9	350.1	373.8	411.1	389.6	354.3	335.4	406.2	442.9	459.8	359.7	359.7	373.6	392	437.5	400.2
265575_at	2191.4	2029	2206.5	2282.9	2222.8	2288.7	1611.6	1605.7	1613.9	2452.9	2330	2655.6	2175.7	2239	2023	2399.1	2527.9	2613
265576_at	1020.1	845.8	934.3	776.7	660.6	737.9	989.2	937.9	1108.4	800.4	789.6	761.7	1096.5	1054.6	1189.3	821.8	778.7	872
265581_at	490.9	612.4	499.7	389.7	410.3	445.7	508.1	531.6	495.8	504.1	477.2	496.1	479.4	595.8	420.9	482.9	423.5	487.2
265583_at	448.8	300.3	310.1	280.2	291.8	201.7	422.3	322.8	377.9	272.3	289.7	292.7	338.1	440.4	473.6	301.2	224.4	386.2
265584_at	171.8	238.7	213.3	268	210.3	226.8	225.6	201.9	210.4	159.2	197	181.3	208.5	179.3	300.1	205.9	216.1	180.1
265585_at	279.7	324.3	372.1	265.3	250	297.1	317.7	328.3	278.4	303	315.3	380.9	304.1	339.9	382.1	243.6	239.7	210.3
265593_s_at	784.9	979.4	969.1	956.6	1023.6	1034.1	802.9	760.2	1050.9	999.2	812.9	1096.9	987.8	867.2	860	959.4	825.2	874.6
265594_at	1651.7	1726.9	1731	1896.6	1665	2150.8	1712.4	1929	1811.8	1522.3	1329.1	1347.9	1790.1	1136	1182.6	1665.5	1579.1	1381.8
265595_at	891.8	877.1	803.9	819	632.2	852.8	840	1028.2	911.4	610.2	673	789.7	664.3	743.8	669	776	657	769.2
265596_at	384.4	450	310.8	511.3	564.3	566.5	459.1	491	488.2	370.9	378	347.9	294.3	318.1	308.6	388.3	354.7	316.4
265570_at	401	416.5	318.2	412.5	447.2	362	489.5	480	391.5	426.6	351.9	407.4	384.7	384.8	348.1	353	384.5	294
265571_s_at	695.9	914	936.2	669.6	1002.1	603.2	838.5	889.7	790.7	845.8	904.6	435.2	547.4	916.4	798.9	1018.5	1019.9	883
265572_at	383.5	261.9	268.1	425.6	420.5	486.4	287.6	322	279.1	347.2	376.6	315.9	210.5	312.6	281.3	408.5	397.5	350.7
265542_at	508.8	471.7	456.3	456.2	280.6	432.3	455.7	421.6	453.2	449	402	452.4	461.9	467.7	497.3	406.6	287.5	372.9
265547_at	177.8	219.2	236.1	265.1	161	237.1	167.2	190	167.4	184.6	176.6	194.2	160.4	204.5	182.4	146.8	164.2	189.6
265560_at	12157.5	10258.4	13692.3	11640	15557.4	14792.5	9938.5	11604.9	11260.9	15875.8	16236.7	17780.7	13491.4	16517.7	13780.3	16782	16074.2	21453.8
265569_at	3390.3	3669.1	3427.9	4129.8	4681.9	2911.5	3048.2	3077	2995.1	3779.5	3350.1	4346.7	3081	2908.9	2983.3	3451.3	3999.5	3247.7
265510_at	452.4	313.8	437.1	520	573.9	477.6	370.1	411	274.3	947.3	798.3	973.7	596	450.8	603.4	1074.5	960.7	824
265512_at	235.9	265.2	333.9	375.1	233.8	337.8	303.2	266.4	297.8	253.1	343.7	307.9	335.1	316.1	408	262.9	280.9	338.6
265521_at	218.1	291.2	277.1	267.3	297.4	220.7	273.5	287.2	299.4	272.9	293.8	196.5	285.7	204.6	251.4	247.3	270.6	231
265530_at	2378.7	1532	1502.9	2472.6	2427.6	2771.8	2353.2	3001.6	2961.1	2310.3	2204.7	2644.6	3073.5	4144.1	3403.7	3620.6	3470.2	4295.8
265535_at	211.6	218.8	243.1	122.6	174.1	181.7	197.5	200.2	157	143.3	156.8	114.5	259.7	229.4	269.5	91.3	182.9	180.1
265538_at	261.9	311.3	332.1	361.4	233.3	316.5	285.9	289.6	291.7	318.1	336.8	356.8	270.1	281.4	356.2	309.2	246.4	232.1
265539_at	66.1	70.9	71.8	89.7	117.8	69.8	52.7	50.9	69.2	152.7	66.1	148.5	92.6	114.7	150.5	169	92.4	134.7
265478_at	3895.3	3313.1	3098.7	3380.5	4180.8	3139.7	2318.9	2466.5	2439.6	4740.8	4992.8	5700.3	4180.1	4169.3	4284.6	3878.6	3793.9	4321.2
265480_at	6638	7299	6183.6	8316.5	7774.5	6960.9	6732.9	7055.7	6222.4	9350.6	10221.2	8803.1	8749	10573.9	8815.8	10444.5	9181.6	9480.3
265481_at	1326.5	1391.1	1786.2	1118.5	1503.1	1306.2	1462.8	1436.2	1595.5	1631.6	1793	2077.6	1987.8	2817.5	2759.8	2273.3	2245	2821.4
265484_at	393.6	482	470	582.8	397.4	537.1	434.1	503.4	402.6	323.5	434.6	327.7	247.8	373.4	329.8	407.9	394	329.8
265495_at	639.8	658.5	634.4	499.4	501.4	595.2	498.3	556.1	533.1	587.6	638.1	893.7	773.7	787.8	765.4	621.8	538.5	692.9
265505_at	372.2	347.9	354.6	331.3	269.4	273.5	299.1	260.1	261.6	282	324.7	280.2	309.7	293.9	353.5	265.8	292.4	378.4
265472_at	680.5	605.5	601.3	854	812.5	1016.4	909.8	829.9	798.8	1114.9	1146.4	1395.8	1356	1164.1	1344.1	1194.2	1455.9	1642.9
265474_at	449.4	659.9	687.4	1315	552.9	419.2	630.3	628.6	703.3	594.5	803.4	477.7	546.2	544.2	503.5	665.6	570.2	445.1
265475_at	5284.2	5447.2	5410.2	5437.7	5131.1	4628.7	5175.8	5285.7	5076.7	3932.5	3724.3	2368.5	2735.4	3000.1	2588.7	3563	3622.9	2363.8
265476_at	397.7	271.5	314.6	360.6	499.6	397.1	306.8	319	311.9	503	435.4	598.3	463	483	626.7	502.6	548.2	756.7
265449_at	197.7	212.6	206.8	208.8	284.7	161.1	190.9	194.5	220.7	224.8	203.9	192.9	140.4	133.7	184.6	185.8	197.2	255.7
265450_at	561.3	246.5	267	357.5	260.1	280.8	388.9	403.9	453.1	416.4	386.6	612.3	579.3	681.6	744.9	448.5	345.5	460.3
265451_at	794.9	853.8	727.2	682	837.9	877.7	899.3	689.9	683.3	797.3	822.8	1154.9	1158	895.2	1099.2	883.9	1141.9	1329.9
265452_at	192.5	129.5	208.8	152.8	148.6	256.8	209.5	266.5	269.2	203.2	163.5	165.6	165.9	303.7	255.4	280.2	238.4	228.5
265453_at	732.4	784.6	777.7	453.4	451.5	488.4	788.3	863.1	888.1	460.7	417	367.8	657.6	787.6	678.9	561.5	470.4	499.2
265460_at	3770.4	1239.5	1271.5	2222.4	2208.6	2409.3	3030.2	2534.2	2565.5	4343.4	3400.9	4485.7	3944.5	5020.8	4867.1	4990.3	4237.2	4592.8
265461_at	528.7	389.9	451.1	463	426.2	430.5	390.4	427.4	455.4	429.3	374.6	545.8	496.9	481.1	554.5	539.9	524.7	459.1
265464_at	245.6	190.6	296	188	232.8	232.3	256.3	271.5	286.3	240.2	261.1	269	214.5	242.8	194	187.7	158.2	178.5
265467_at	461.5	403.3	518.5	423.1	337.8	395.9	545.9	558.5	484.6	441.4	365.7	458.8	503.5	572.8	548.4	417.7	391	356.9
265469_at	230.5	200.6	251.5	327.6	208.7	203.2	170.6	137.8	205.2	220.7	146.8	204.1	218.7	202.6	174.7	193.5	185.4	190.2
265444_s_at	2830.9	3185.1	2697.3	1702.3	1915.3	1855.9	2816.7	2877.3	2651.9	2760.7	2410.4	2100.9	2725.2	2236.4	2075	2211.1	1954.9	1579.4
265445_at	7790.4	8956.9	10595.2	11301.5	8049.9	10437.8	10327.6	10205.2	10819.9	6188.3	8536.1	7803.1	5509.9	5936.3	5355.7	8511.4	6180.5	6237.1
265446_at	1908.5	1186.6	1077.3	1508.7	1281.5	1658	1554.9	1726.3	1467.2	1884.2	1664.1	2435.4	2180.8	2054.2	2248.1	1912.2	1861.3	2116
265416_at	812.8	818.1	894.7	729.7	823	695.9	818.4	821.1	866.2	898.7	886.1	623	798.1	808.4	874.5	829.2	823.7	724.9
265417_at	2033.7	2287.7	1945.1	2423.8	2096	2397.3	1799.2	1805.7	1546.5	2292.6	2280.7	3221	2805.1	2372.6	2974.5	2160.6	2365.6	2845.8
265419_at	233.4	266.5	239	293.3	228	157.4	275.5	283.3	283.4	211.9	263.7	281.5	197.7	191.9	212.7	229.4	206.7	169.7
265423_at	369.1	297	303.8	275.8	311.1	274.3	295.2	280.1	268.7	304.4	356	371.7	330.3	420.4	355.3	297.1	306.9	390.5
265424_at	386.8	323.9	277.8	268.4	264.6	229.4	347.2	320.8	295.3	301.2	334.2	452.7	436.7	494.5	507.3	297.3	356	488.5
265426_at	807	701.1	845	683.6	850.1	703.7	739.2	695.7	807	989.2	970.7	1144.9	807.3	934.5	881.6	1071	950.4	1041.5
265427_at	431.7	455.4	432.2	296.9	354.5	270.5	380.4	452.2	407.1	478	511.8	391.1	257.9	513.8	373.1	466	470.2	412.3
265429_at	176	128.2	116.5	210.6	172.6	132	136.9	150.3	131.6	123.6	97.7	180.2	111.7	60.9	96.6	99.5	118	97.9
265431_at	174.9	181.3	152.3	158.4	183.7	213.1	139.9	167.9	192.3	151.8	181.4	224.8	160.9	168.4	143.5	211.1	228.6	259.7
265432_at	157.7	195.3	180.1	216.2	202.8	149.3	136.5	149.1	118.7	166.2	137.8	161.5	137.5	167.6	104.1	142.2	146.7	108
265437_at	84.1	149.7	132.6	98.4	128	69.4	85.5	122.8	134.9	97.7	126.6	72.5	80.4	99.4	97.5	121.3	75.5	125.3
265440_at	959.3	789.6	734.4	560.5	661.4	625.7	714.3	802.7	707	646.3	815.9	848	928.1	936.5	1058.3	604.5	763	931
265441_at	170.3	210.9	163.7	187.7	182	257.9	208.6	204.6	182.8	358.8	760	578	174.5	189.4	224.8	172	192	237.9
265442_at	239.6	415.2	391.3	352.6	348.3	317.8	355.8	398.2	453.9	243.1	259	254	365.2	247.4	320.9	339.6	298.1	301.8
265309_at	128	169.9	175.5	115.1	130	114.4	112	130.4	165	146.8	132.4	99.2	125.1	87	109.3	134.9	121	112.5
265310_at	867.1	783.3	716.2	718.4	598.4	883	922.3	985.2	1000.9	728.7	749.4	825.3	643.9	732.2	637.9	645.1	601.4	681.6
265312_at	113.2	141	159.2	164.9	130.7	97.6	119.6	144.6	138.8	115.8	103.8	122.6	112.1	125.4	120.5	116.9	127.4	137
265443_at	352.4	426.2	311.5	272.4	239.5	292.9	279.9	240.3	277.4	237	251.3	326.6	257.8	182.8	285.8	206.5	225.9	333.1
265415_at	9465.1	10889.7	10207.2	10463.7	9830.4	13794.5	10015.6	9125	9203.5	9181	10266.6	11446.4	9709	8596.3	8115.3	9713.3	8795.1	9784.6
265384_at	1612.6	967.4	1176.6	1490	1598.8	1494.5	1081.9	1459.6	1222.4	1330.4	1478.1	1560.4	1420.7	1568.3	1665.5	1444.6	1597.5	1851.8
265385_at	328.5	349.9	386.1	326.8	329	362.6	339.9	340.9	347.5	395.1	447.7	531.8	475	546.3	552.3	342.6	353.4	494.9
265386_at	1651.8	1481.2	1395.3	1693.8	1690.6	1736.6	1391	1308.9	1482.7	1804.7	1865	1749.2	1637.3	1362.7	1550.8	1721.6	1523	1749.9
265388_s_at	1741.1	2038.5	2007.1	1527.7	1375.5	1605.6	1951.5	2261.2	2186.8	1664.5	1675.7	1847.5	1880.8	2146.1	2014.7	1579.1	2010.5	1658.4
265389_at	1022.1	1091.4	1120.8	1144.1	1330.3	1401.1	962.2	1136.8	1142.2	955.8	989.4	874.3	847.6	1029.4	799.9	1133.7	1051.5	988
265390_at	4359.5	3333.1	3307.1	4612.3	4453.3	3660.4	4205.3	3483.4	4003.3	4265.1	3482.3	3732.1	3767.7	3491.9	3722.2	3944.1	4505.6	3533.6
265391_at	415.7	376	438.5	365.7	324.6	393.5	408.1	429.6	315.1	358.6	372.5	407.6	461.3	369.7	491.7	288.3	473.9	369.4
265392_at	2613.4	3029.6	3171	3728	3648.3	3323.6	2996.1	2972.5	2981.1	2849.2	2984.3	2916	2809.7	2593.5	2752.6	3341.3	3544.4	3307.2
265393_at	424.9	457	361.5	464.1	483.3	493.5	367	412	412.5	469.3	464.3	448	408.9	403.4	305.7	394.4	448.1	437
265394_at	809.4	800.1	802.1	919.8	1055	855.7	712.5	685.5	686.8	804.3	862	870.3	787.9	760.8	811.2	799.7	908.8	949.8
265395_at	341.8	468.2	411.8	451	371.8	419.7	345.5	391.8	385.8	415.4	381.9	347.7	347.5	371.5	338.5	383.9	316.6	296.7
265398_at	215.9	362.4	385.6	447.4	358.8	354.1	342.6	279.3	387.2	359.6	334.5	290.8	297.7	282.9	325.1	365.9	322.2	346.9
265400_at	13359.6	14890.7	17985.1	18700	20261.6	19999.5	17073.6	14949.1	16853.3	12570	13829.7	11486	9520.1	11709.4	12351.9	13233.3	12442.4	11696.8
265402_at	503.2	440.8	413.1	461.5	458.8	527.9	432.3	427.6	461.7	483.2	523.1	520.3	570.7	424.1	568.7	499.1	533.3	584.7
265405_at	110.3	169.6	75.6	206.1	139.2	129.5	124.9	142	97.1	129.8	147.2	99	155.9	153.7	133.7	134.3	103.8	149.6
265411_at	545.8	396	478.2	567.5	543.6	572.8	511.5	500.9	443.3	393.7	469.7	492.9	405.2	487.6	461.1	508.3	414	486.1
265412_at	679.9	650.1	838.3	649.9	504.4	486.8	668.2	722.5	709.3	572.8	579.2	458.6	469.4	522.3	640.4	498.2	501.4	354.1
265413_s_at	147.2	171.6	136.2	193	170.3	181.2	174.6	208.4	182.2	171.5	158.9	319.7	116.6	175.7	175.4	234.6	299.4	252.5
265414_at	8513.8	7511.7	7020.6	6945.3	6840.4	6817.9	5678.7	6367	6750.3	7829.4	7284.1	7187.9	7550.8	7288.5	6257.3	6850.9	6418.6	3938.9
265383_at	202.9	232.6	245.2	219.6	246.6	211.6	253.9	230.6	281.5	220.8	193.1	169.2	194.3	194.4	139.9	267.1	201.2	146.1
265352_at	13276.6	10751.9	11154.3	10294.8	13329.7	12313.5	10863.9	9593.2	9914.9	14444.8	12493.6	14703.8	11944.6	10658.2	11871.5	12028.4	12818.6	13984.9
265353_at	1580.3	1861.3	1735	1593.2	1645.2	1459.1	1563.4	1718.1	1877.1	1492.4	1268.1	1171.6	1360.6	1319.9	1177	1262.5	1338.4	1146.3
265354_at	741.9	824.3	984.3	626	751.4	856.2	735.3	700.5	836	1204.6	1271.8	1324.2	854.9	905.2	790.3	1244.8	1033.4	766.6
265357_at	1224.7	963.5	968.9	1089.3	1177.4	1088	870.7	783.7	904.8	1194.1	1005.8	1507.6	1406.5	1343.3	1631	1060.4	945.3	1484.3
265358_at	900.5	789.8	690.8	903.1	846.4	1043.2	816.1	764	724.2	1099.4	1194.8	1380.4	840.4	965.8	875.4	1144.2	1178	1226.1
265366_at	291.3	265.1	284	231	202.1	257.3	350.6	300.6	272.3	195.9	249.8	283.4	395.1	352.5	258.7	240.6	207	266.7
265373_at	74.7	79.5	109.3	71.1	75.7	86.7	91.6	93.2	78	62.9	91.9	76.9	81.1	81.8	79.8	57.5	79.6	70.9
265374_at	22183.4	21565.6	24640.7	25407.9	28433	26250.7	23794.4	19545.7	21176.6	24392.5	25129.1	24821.6	20858.8	20087.8	21083.7	20980.1	20917.5	22896.4
265375_at	1013	728.6	812.3	868.2	1000.3	1205.7	911.8	955	955.9	1309.2	1302.4	1895.9	1224.1	1367.7	1412.5	1546.6	1634.7	1851.9
265376_at	105.2	100.6	100.6	101.9	85.1	98.3	96.1	76.6	109.2	112.6	72.9	107.1	113.1	95	62.5	96.3	58.9	100.2
265377_at	3126.6	3705.6	4098.5	2605.9	2627.5	3161.3	3951.3	3892.2	4050.5	2357.7	2655	2894.6	3062.9	2853.4	3294.5	2267.7	2638.3	2482.5
265321_at	814.2	751.1	894.8	768.9	678.4	688	720.8	654.9	635.8	944.3	765.9	1003.1	785.4	819.9	1098.1	806	923.1	1017.4
265324_at	421.9	435.7	351	416.2	481.1	400.5	330.3	382.5	357.3	411.1	384.2	591.9	490.9	461	460.9	507.9	468.2	542.8
265325_at	176.6	293.5	198.9	128.3	226.5	218.1	175.4	209.2	236.8	272.7	250.1	288.3	296.2	258.7	263.4	211	361.8	347.7
265326_at	220.6	181.5	271.1	197.2	157.5	264.1	226.8	267	223.7	208.2	164.9	106.8	123.2	126.8	124.8	159.9	140.4	112.7
265330_at	312.9	285.4	312.6	488.3	487.9	428.9	333.4	369.4	312.4	721.5	709.9	501.7	280.6	410.8	294.7	744.2	553.6	457.8
265333_at	113.1	108.9	119.3	90.3	163.1	108.8	117	123.4	66.1	121.2	120.9	165.7	124.7	81.8	159	131.3	131.7	102.7
265335_at	130.1	138.1	116.4	211.6	141.1	126.1	114.1	97.6	102.8	121.2	167.6	168.6	122.4	128.2	100.1	109.5	155.5	175.8
265336_at	821.9	790.7	859.5	895.4	946.9	818	745.4	842.9	843.9	814.4	777.7	726.7	667.3	737.2	711	972	834.4	765.9
265337_at	509.4	814.5	866.4	551.7	624.3	654.1	853.2	884.8	784	741.4	737.2	588	578	631.8	539.5	836.3	756.9	653.5
265338_at	595.8	712.3	705.7	758.4	788.8	823.2	685.7	797.3	761.5	762.2	720.5	572.3	655.6	513.5	398.1	749.9	693.2	574.9
265339_at	911	916.2	811.9	885.4	794.5	570.6	796.5	684.8	751	1257.6	1515.1	1169.4	1327.8	1217.2	1508.8	803	1156	1360.5
265340_at	350	416.8	391.5	331.1	434	317.8	437.9	483	458	249.1	290.3	264.1	192.6	382	343.1	337.6	315.6	281.9
265342_at	1228.6	1161.1	1317.2	994.9	952.5	838.9	1153.3	1103.9	949.7	1126.4	1042.2	937.9	1191.6	1118.7	1095	980.8	939	740.2
265343_at	226.3	180.4	189.6	311.7	268.5	252.7	200.7	210.2	157.7	380.1	285.4	307.6	248.3	273.8	239.6	295.4	279.3	235.3
265344_at	911	556.3	639.8	640.4	580.3	465.8	621.8	654.5	659.9	1068.3	1020.6	1113.4	1040.1	1199.1	1614	972.5	988.2	1214.1
265347_at	377.8	369	406.9	318.1	337.7	310.9	338.3	324.9	337.9	326	322	359.2	456.9	389.7	426.7	287.9	379.4	322.2
265317_at	134.8	178.8	223.9	133.7	205.1	205.3	196.3	201.9	220	272.3	211.3	179.1	122.1	194.3	139.8	222.9	164.1	207.7
265318_at	221.8	193.8	232.6	306.2	286.3	261.2	284.4	222.5	246.2	187.4	254.4	222.5	198	126.1	138.2	222.2	218.3	194.7
265319_at	4098.9	4541	5294.2	4192.6	4302.5	4174.6	4124.6	4217.7	4314.4	3773.3	4210.7	3299	4512.3	4212	4445.9	3792.8	4649.4	4609.1
265289_at	321.9	281.3	246.9	250.8	247.2	229.6	205.7	197.6	223.3	277.8	242.5	263.6	347.1	317	295	220.8	272.8	279.5
265291_at	334.9	347.8	414.2	304.5	419.4	367.9	370	360.7	361.8	347.6	408.6	323.2	366.8	373.6	430.6	360.4	384.9	406.6
265297_at	318.3	275	239.9	170.4	245.6	196.7	281.8	282.4	253.1	190.7	316.3	221.2	459.8	406.1	497.4	252.5	232	237.3
265305_at	532.7	512.3	436.8	572.4	495.5	528.6	541.7	607.3	553	602.9	695.1	679.7	849.7	1009.2	762.3	576.7	705.4	604.9
265307_at	161	253.7	336.8	219.9	213.9	172.5	208.2	190	267	170.6	209.7	253.4	242.9	231	225.3	163.1	197.8	177.1
265283_at	453.6	404.2	395.9	342.1	326.8	327.9	413.7	492	417.3	364.1	370.4	247.4	512.8	437.5	594.3	383.9	465.9	258.2
265284_at	1558.1	1504.4	1524.3	1535.3	1332.3	1441.5	1779.2	1719.9	1692.6	1557.6	1500.9	1793.3	1913.3	1681.6	1891.8	1438.4	1625.9	1536.6
265286_at	2699.4	2917.6	3122.1	2915.9	2630.1	3136.1	2855.7	2866.2	2809.3	2701.8	2670.5	2950.4	2908.6	3006.4	2678.6	2774.1	2856.3	3017.4
265287_at	9463.6	11788	11612.4	9642.6	12007.1	11257.3	10232	10092.4	9429.9	10631.6	10868.8	11399.2	10858.5	9351.7	10492.8	9295.4	9633.6	10366.2
265288_at	2012.6	2414.6	2133.2	2117.6	2025.6	2714.7	1778.6	1888.3	1867.9	1711.3	2007.5	2137.2	1938	1944.7	1488.7	2037.8	2060.6	2224.8
265257_at	4337.4	4381.2	3890.9	4103.2	4088.7	4187.3	4624.6	4747.4	4940.2	4114.3	3451.1	4479.7	4411.6	4713.3	4548	3907.2	4217.9	4457.3
265258_at	389.2	507.1	490.3	502.9	522.8	565.2	607.9	617.3	511.5	416.4	331.9	447.8	437.7	455.8	374.2	502.7	399.5	406
265259_at	408.3	444	383.5	371.9	413.5	416.2	394.8	482.4	385.1	384.9	424.2	340.1	388.5	409	479.6	443.3	393.8	415.9
265021_at	759	1077.4	981	1118.9	969.3	826.3	838.5	820.2	852.6	830.6	819.8	599.7	685.7	575.6	571.9	916.2	785.5	638.2
265023_at	384	294.3	352.9	327.1	272.4	362.6	310.9	308	317.9	446.6	392.2	358	412.2	388.8	446.1	454	327	370.8
265025_at	437.6	390.2	270.7	397.9	266.2	314	498.2	580.8	471.3	326.6	277	268.2	341.3	496.7	686.7	517.7	344.3	408
264857_at	987.4	1320	1220.9	972.5	1113.6	901.1	1314.8	1346	1157.9	823.9	1205.4	670.7	1049.4	1030.5	1086.6	1143.5	753.6	810.1
264858_at	272.5	317	329.4	222.6	192.1	187.5	250.1	285.4	270.8	205.2	242.2	293.2	277.3	344.3	344.8	176.9	162.9	225.6
264859_at	224.8	212.9	230.5	230.3	246.6	280.4	292.1	254.4	242.5	279.2	244.8	244	209.7	192.4	164.3	219.6	168	174.2
264862_at	102.6	108.8	122.3	83.8	78.2	121.9	128.1	113.7	122.7	74.1	66.3	54.5	109.7	112.8	121.5	92.7	101.2	93.1
264864_at	143.4	184.6	181.9	266.1	240.3	238.5	197.2	198.3	280.2	202	155.4	157.3	129.7	166.5	118.9	226.6	219.1	179.8
264865_at	899.5	1107.9	1134.2	1106.2	982.2	1012.9	1039.2	1109	829.3	1088.7	1089.7	1213.9	1005.8	1007	1117.8	1061.2	932.5	1153.9
264867_at	167.5	73.1	72.1	82.3	65.5	51.6	110.8	121.2	119	114.2	133.1	73.3	126	174.4	160.7	101.5	118.9	118.7
264869_at	312.9	297	292.7	388.1	304.7	320.4	339.2	312	252.3	305.7	388.2	274.6	321.2	395	309.3	403.5	352.7	337.7
264871_at	777.9	915.2	960.7	894.2	953.7	771.6	1063.1	943.7	1002.1	791.7	716.2	752.8	728.2	743.7	890.9	878.6	844	804.3
264873_at	1800.5	2036.4	2004.2	1594.2	1957.7	1638.9	2557.3	2381	1775.8	2373.5	1887.9	1466.6	1940.4	2223.2	2283.6	1862.2	2305.6	1953.1
264874_at	117.8	117.1	93.2	128.8	121	137.6	166.4	149.4	107	129.7	139	113.9	150.7	116.5	117.7	149.5	178.6	137.2
264701_at	2587.7	2199.4	1882.2	1872.1	1785.9	1729.5	2015.8	1994.8	1949.5	2280.6	2604.3	2503.6	2956.6	3165.1	2784.4	2262.3	2145.5	2412
264702_at	252	365.4	312.9	325.2	407.9	417	343.8	346.5	316.4	319.8	337.4	344.4	291	274.4	308.2	369.6	399.2	332.1
264703_at	571.6	551.6	546.5	593.1	683.9	867.2	495	562.6	565	824.3	670.6	824.8	625.4	612.2	652.4	682.4	708.7	892.7
264704_at	284.5	260.2	377.4	275.1	331.4	292.7	371.4	417.3	344.4	336.9	307	295.8	180.9	227.9	215.6	342.4	315.1	247.5
264705_at	1313.5	1313.3	1244.9	1115.6	952.2	1050.3	1343.2	1364.1	1423.2	850.8	843.6	899.6	921.7	1082.6	1070.3	892.8	829.8	654.7
264707_at	261.1	192.1	177.9	255.1	193.1	139.2	223.8	253.3	213.8	210.3	216.4	220.1	299.2	224.1	260.9	179.5	185.9	143
264708_at	182	132.4	161.8	139.9	202.1	194.1	160.3	172.5	151.1	231.7	282.8	287.1	275.3	199.4	307	350.7	406.3	398.9
264709_at	632	533.5	711.5	449	410.5	500.3	597.3	655.9	629.4	403.7	453.1	484.7	443.4	622.4	755.2	337	491.6	450.8
264712_at	111.4	194.2	219.6	153	194.2	154.7	179.8	132.7	197.2	171.3	158.7	123.6	138	126.8	136.3	161	151.6	105.3
265266_at	301.7	207.2	213.7	230.6	199.3	220.2	257.1	239.7	189.5	340.1	361	373.4	458.3	374.2	424.7	305.4	312.9	397.9
265269_at	187.1	178.2	125.4	175.7	78.1	130.1	155.1	130.3	178.7	152.5	156.4	191.9	152.2	180.5	151.9	193.7	120.9	144.5
265270_at	2095	2376.7	2344.5	2645.3	2376.5	2376.8	2216.7	2767.7	2715.5	2047.9	2017.8	1630	2196.5	1978.5	2197.9	2027.1	2290.8	1965.7
265271_at	133.8	138.5	172.4	247.6	162.5	167	146.2	112.1	101.4	211.7	174.9	180.1	95.1	126.4	158.8	142.2	139	178.6
265272_at	156	82.3	82.4	107.9	80.3	101.2	84.3	86.3	132.4	67.5	90.4	124.3	99.7	67.6	148.5	68.2	119.1	152
265273_at	205.2	218.1	225.6	252.3	276.3	193.6	204.5	248.1	228.3	255	250	244	225.1	290.6	236.5	201.8	292	302.6
265274_at	366.3	416.4	415.1	372.4	336.6	451.5	406.4	395.6	420.4	287	308.5	244.8	258.3	273.9	304.1	338	367.8	232.1
265277_at	409.7	554.8	532.4	484	433.3	525.7	417.6	374.4	406.1	485	451.7	486.8	480.5	461.7	487.5	393.2	392.5	474.3
265281_at	822.8	725.4	768.4	568.3	695.2	912.6	744.4	749	842.1	764.7	760.2	977.6	647.2	963.4	818.2	720.8	837.1	933.5
265254_at	330.6	380.8	476.4	290.1	277.2	261.6	329.3	360.8	387.5	301.5	292.1	293.8	396.5	328	314.1	253.7	288.7	320.5
265256_at	538.5	632.4	616.3	584.4	579	459.7	588.9	566.2	514.6	495.2	574.7	571.9	526.9	704.2	614.6	493.3	492.6	520
265226_at	1169.2	1271.4	1240.3	1235.5	1715.5	1068.1	1278.7	1221.7	1295.9	1282.8	1257.3	1115.4	1404.7	1111.8	1111.2	1210.8	1654.2	1306.5
265243_at	64.3	77.4	126.8	76.9	67.4	51.7	81.6	78.1	75.2	78.7	88.5	110.5	92.8	129.9	102.2	35.3	63.5	100.4
265244_at	1571.7	1323.8	1256.7	1398.3	1425.9	1358.7	1440.7	1617.5	1554	1839.3	1899	2016.5	2037.1	2154.4	2088	2009.1	2571.5	2433.7
265245_at	177.5	138.1	150.2	91.1	83.4	140.4	169.5	122.4	141	153.3	153.6	230.7	241.9	269.6	355.3	126.1	137.8	249.5
265247_at	14115.2	16286.1	16715.5	18356.4	21166.7	18604.1	16442.9	14939.1	15555.3	16663	16253.6	16378.8	13995	12591.1	11503.9	16254.6	15661	14508.9
265248_at	765.5	892.6	751.4	603	702.2	884.5	802.2	778.5	765.5	596.2	846.4	891.5	985.5	942.3	969.3	867.7	898.5	1001.8
265250_at	157.4	184.3	133.7	134.4	98.9	105.7	138.5	111	168.4	123.4	89	117	105.6	129.2	122	100.8	103.1	89.6
265252_at	241.4	241.3	276.4	261.8	181.8	206.8	241.9	212.5	167.6	197.3	191.1	243.5	281.7	232.9	342.6	210.6	196	213.7
265219_at	1959.4	2071.8	2157.5	2415.2	2547.2	2824.6	2237.7	2034.3	2297.8	2720.5	2826.5	3261.8	1849.1	2042.9	1948.7	3174.1	2872.1	2941.9
265220_at	1324.8	1044.1	1117.9	1092	886.5	1136.8	1179.1	1139.8	1212.7	1137.4	1185.8	1483.6	1692.1	1456	1532.5	1224.8	1346.8	1579.8
265222_at	1379.1	1378.5	1367.6	1271.9	1117.7	1184.4	1378.6	1289.1	1446.3	1113	1351.5	1310.2	1266.3	1437.3	1370.9	1194.1	1261.8	1406.1
265225_at	421.6	361.9	486.2	446.8	420	393.7	346.8	392.3	411.6	329.7	383.6	371	323.4	337.3	403.6	275.5	360.2	384
265195_at	86.4	124.3	91.8	114	147.9	129.4	97.5	86.3	122.8	137.7	103	138	65.4	97.8	77.4	107.4	101.8	72.4
265201_at	284.2	307.7	287.1	220.1	206.5	185.9	225.6	246.2	255.2	256.9	310.6	266.1	362.6	241.8	358.5	206.3	254.1	273.6
265203_at	356	375.4	295.3	283	266.3	254.7	304.3	265.7	258.6	334.4	293.4	375	329.5	312.6	382.1	289.2	325.8	422.2
265207_at	349.1	303.6	346.1	374.5	384.9	287.8	302	248.3	275.1	467	414.3	530.2	384.1	341.3	385.1	402.4	484.6	479.8
265210_at	8072.3	8645.6	8701.9	9511.5	9733.1	11924.7	8715.6	8192.9	9398.7	7301.1	7040.1	6190.4	5583.2	5335	4271	6935.4	7370.7	6064
265212_at	266.2	303.2	232.2	340.7	356.1	243.5	242	222.2	217.6	268.5	315.2	392.3	283.1	280.1	270.4	288.4	201.8	325.4
265217_s_at	188.9	156.9	147.9	185.3	162.3	173.8	164.2	146.9	143.3	217.5	214.1	230.1	126.6	232.6	207.8	171.7	209.6	215.6
265218_at	389.1	439	481.6	512.8	476.5	437.2	469	478.6	467.9	389.1	390.5	290.2	473.3	398.9	316.6	335.2	421.5	323.9
265191_at	151.7	164.4	125.8	70.8	135.7	80.2	182.3	140.6	155.5	92.8	141.8	164.8	167.3	122	153.4	119.5	107.3	109.7
265192_at	377.8	254.2	356.5	380.2	371.2	263	266.8	286	281.9	371.1	426.6	475.9	633.5	501.3	615.4	286.4	434.5	353.2
265193_at	410.1	422	410.2	430.4	508.7	514.6	375.1	435.9	383.5	374.6	513.3	525	471.6	516.6	518.6	490	514.7	501
265194_at	6273.1	3128	2837.1	3074.9	3125.6	3560.3	3707.9	4302.3	4136.7	3036.2	3417.9	4577	6820.8	5027.5	6895.4	3719.3	4308	5599.7
265172_at	2449.4	3088.4	2852.7	2858.4	3131.1	2710.3	2914.1	2927.2	2680.1	2698	2608.4	2406.6	2300.5	2432.8	2184.2	2985.5	2155.3	2273.6
265174_s_at	101	97.5	109.4	132.7	95	156.4	183.2	138.7	98.4	124.2	121.6	113.4	85.7	65	201.5	126.2	185.3	113.9
265175_at	264.8	315.6	334.1	298.8	249.4	397.6	310.4	272.2	375.9	179.3	218.4	189	286.1	202.9	187.7	249.1	199	125.3
265182_at	4250.8	4917	4461.5	4553.3	5668.6	4977.6	4023.9	4223	4022.4	4627.5	4734.2	4591.4	3628.4	4057.7	3939.9	4665	5102.1	4772.5
265183_at	356	355.5	435.8	515.9	520.4	414.5	338	352.8	372.7	375.8	367.4	425.3	336.4	307.9	317.8	432.4	439	342
265187_at	4898.5	4817.9	4870.5	5476	6223.5	5519.1	6369	5824.8	5624.3	5006	5173.4	4616.6	4965.5	5861.8	5233.5	6104.3	6265.9	6293.7
265188_at	144	181.1	189.3	179.5	156.5	260.3	206.1	212.1	177.8	197.6	213.3	236.2	308.8	279.9	326.5	285.7	236	322.9
265190_at	551.7	421.8	374.2	388.3	508.2	389.3	462.7	493.3	479.8	477.8	539.1	589.8	533	612.1	661.6	486.8	552.2	554.5
265139_at	263.3	383.2	383.3	363	292.1	464.6	333.1	357.7	352.1	245.6	311.8	152.6	204.9	193.5	174.4	280.4	264.7	200.7
265141_at	307.1	380.3	303.4	243.7	220.1	276.3	270.9	353	355.8	227.1	243.1	219.2	376.4	375.3	404	256.3	250.4	212.8
265142_at	444	576.8	576.9	511.9	450.6	582.1	417.4	439.4	413.1	460.6	437.2	563.3	515.5	522.5	533.7	371.2	428.8	543.9
265143_at	225.2	231.7	203.8	307.9	293.9	282.5	234.8	172.2	181.4	238.5	186.8	284.4	218	278.1	210.8	255.2	195.5	253.5
265148_at	1038.4	1061.6	977	1472.7	1476.4	1574.3	916.1	1103	1316.7	1617.9	1605.5	1835.1	976.2	1150.2	1276.7	1556.1	1760.4	1486.1
265149_at	13473.2	13344.1	14019.8	13665.3	13880.9	14912.6	10851.3	10322.1	9440.6	14208.4	13560.6	15635.2	12077.4	12920.7	13594.7	11735.1	12499.9	16087.3
265150_at	3121.8	3477.6	3816.2	3139.5	3123.7	3266	3581.7	3413.7	3397.7	3508.4	3391.1	4778.9	5192.5	4659.7	5026.4	3621.1	3538.3	4621.2
265151_at	169.1	167.4	169.5	135.2	137.1	121.6	125.2	130.5	154.7	190	172.7	134.6	196.6	141.5	156.2	187.9	197	172.4
265154_at	107.3	144.6	151.5	159.2	141.4	216.6	126.4	141.6	154.7	111.8	88	114.6	120.2	102.6	88	140.5	122.4	87.8
265161_at	466.2	115.9	138.5	172.6	143.6	110.5	317.2	236.2	306.8	488.8	392.8	611	431.5	405.3	419.5	383.5	303.4	280.9
265162_at	761.3	723.5	856.3	959.1	1085.1	1131.2	716.1	723	665.7	928.1	850.3	800.4	858.4	748.3	867.9	914.4	1005	1071.8
265129_at	391.4	355.9	388.1	616.7	505	411.7	369.5	294.5	440.7	457.5	435	515.7	466.7	335.8	348.6	475.6	311.1	365.8
265130_at	536.5	452.7	434.1	578.1	515.7	741.7	647.7	643.7	548.7	569.4	579.1	829.8	695.1	491.5	761.8	459.5	734.2	709.2
265100_at	99.8	101.9	69.5	85.2	139.5	126.2	101.3	98.6	115.8	125.8	107.8	101.3	85.2	92.8	93.6	100.2	120.1	135.6
265101_at	900.8	923.8	1226.5	1008.6	1040.7	872.1	1289.1	957.7	1106.7	1114.4	1028.4	787.1	1004.1	1148.4	1112.7	1140.2	853.8	952.8
265103_at	124.4	171.3	157.2	125.6	201.7	142.2	133.2	200.9	122.8	185	132.6	158.7	131.2	176.5	142.3	166.6	153	142.4
265104_at	193.2	209.8	151.8	142.4	263.5	148	193	270	268.1	180.6	231.6	230.6	165.9	188.1	214.4	266.6	245.4	213.8
265107_s_at	169.7	142.5	147.3	192.4	191.4	141.4	169.4	145.3	140.9	277.5	217.5	328	279.4	220.7	251.3	233.8	258.7	201.3
265109_s_at	342.9	285.4	267.9	209.1	225.8	233	299.9	324.6	347.3	323.3	351.8	304.7	291.8	355.5	422.6	292.2	232.8	249.9
265116_at	1672.6	1806.2	2436.4	1944.4	2507.5	2374.3	2538.3	2864.1	2902.6	2929.1	2309	2646	2229.9	2157.1	2575.4	3104.2	3295.2	2735.7
265117_at	711.6	654.8	1047.8	713.6	631.1	537.4	710.5	844.6	677.3	1286.6	1028.6	1128.3	560.4	521	892.2	853.4	892.1	693.2
265118_at	666.8	512.3	657.1	746.2	692.8	690.1	655.2	797.9	642.5	339.8	465.2	324.1	875.2	1051.9	551.2	776.9	847.7	712.6
265119_at	138	108.1	132.6	165.3	163	136.6	134.7	164.9	101.8	176.4	171.6	271.1	196.2	222.1	218	267.8	272.8	276.7
265120_at	772.1	977.7	951.4	977.8	1105	795.1	897.8	1044	810.7	777.3	772	717	720.2	550.7	697.6	862.4	573.6	771.2
265121_at	1494.3	1490.6	1999.4	1632	1482.7	1554.5	2058.5	1966.9	1743.5	2093.8	2197.3	2038.5	1979.7	1992.8	2380	2091.9	2197	2304.2
265070_at	311.2	306.5	336	361.9	352.8	381.2	280.7	310.1	285	342.8	372.4	476.3	360.7	300.5	310.7	387.8	379.1	471.9
265071_at	272.5	321.5	329.5	281.6	308.5	226.7	304.3	292.4	284.4	324	332.4	245.3	273.6	279.6	253.2	314	281.1	302.7
265073_at	4019.5	5703.4	4751.4	4395.9	5418.7	4464.3	4288.2	4414.1	3645.1	4727.4	4777.2	3867.8	3099.4	3871.3	4117.7	3109.8	4345.5	3687.8
265075_at	2149.6	668	759.1	854.3	1038.2	1028.8	1065.4	977.2	1035.2	1618.9	1634.8	2167.1	2063.4	1380.4	2118.2	1443.7	1278.7	1790.9
265076_at	9988	12287	12661.7	15053.6	15993.6	14149.3	12596.9	11755.6	11752.4	11613.7	11505.2	6231.9	7305.8	7165.9	5659.7	12389.6	10527.3	7334.8
265077_at	809.8	835.1	781.4	545.5	625.1	638.3	800.3	783.1	693.4	727.6	642.8	872.4	811.7	802.6	878	669.1	676.5	770.6
265078_at	329.4	329.8	375.8	393.3	398.4	224.2	328.2	408.1	341.1	416.9	330.9	263.7	345	330.6	366.9	295.9	289.2	297.1
265079_at	292	316.5	243.8	282.7	281.2	204.2	337.8	369.6	347.2	266.7	302.5	260.1	269.3	296.6	311.9	326.3	288.6	250.3
265083_at	247.7	233.8	220.5	248.4	237.5	207.2	345.5	357.5	356.8	403.8	323.8	391.3	607.4	692.2	670.6	592.1	496.8	511.4
265087_at	113.1	87.3	116.5	132.1	159.4	175.3	116.4	104.5	95.8	83.7	119.5	129.7	83.1	72.4	79.1	92	131.7	83.6
265090_at	76.3	95.4	102.6	106.1	140.7	136.5	98.1	81.3	57.5	74.3	100.5	94	98.2	112.7	48.5	112.1	62.7	134
265091_s_at	334.3	382.8	494.4	451.7	449.3	746.9	568.9	611.9	524.1	310.2	385.9	692.3	1092.4	1234.7	1079.9	480.3	685	1144.6
265092_at	970.5	942.7	1108.9	1059.9	839.8	1056.4	960.6	1036.8	1263.6	902.3	935.9	1028	811.6	1179	1079.6	898.6	893.5	1056
265097_at	264.8	452.8	285.6	357.7	391.4	359.6	379.6	358.7	343.9	275.9	254.7	221.4	206.2	170.1	184.4	252.7	223.8	229.4
265066_at	1115.4	1346.4	1414.9	1673.6	1661.2	1425.9	2180.9	2186.7	2091.3	1021	909.3	777.9	1286.7	1238	1284.3	1389.5	1229.8	1020.5
265036_at	796.7	772.4	798.6	1110.8	893.8	960.9	803.7	769.4	842.5	906.2	838.7	1011.1	792.8	632.9	827.2	957.5	922.4	967.9
265037_at	2074	2820	2391.8	2478.5	2563.3	2621.1	2881.9	2783.7	2601.7	1739.4	1637.5	1768.4	2021.4	1915.2	1414.4	2172.7	2282.3	1797.8
265039_at	208.5	119.9	205.6	147.1	184.9	120.7	160	194.9	159.2	222.7	104.2	135.4	155.9	236.4	188.7	110.1	163.9	129.6
265040_at	394.6	241.8	273.3	155.4	312.9	215.7	312.9	256.6	280.3	331	396.1	438.1	292.1	392.2	391.6	359.1	419.4	419.1
265041_at	92.9	108.1	85.6	145.3	109.5	146.6	160.9	92.9	125.7	135.2	144.4	156.4	102.6	89.2	106.2	126.6	137	144.1
265042_at	2080.2	2235.4	2317.8	3712.4	4205	4131.7	3970.4	3739.2	3624.5	2011	2275.4	1667.4	2852	3124	2210.4	3231.3	3465.6	2482.1
265043_at	1894	1567	1404.9	1610.6	1829.6	2203.2	1814.5	1727.4	1742.7	1689.6	1850.4	2175.2	2396.6	2264.7	1952.6	1729.3	2251.3	2089.6
265044_at	535.4	347.6	401.8	381.5	365.9	399.1	430.3	416	367.8	579	523.6	590.8	591.2	489.5	633.4	523.4	554.2	639
265045_s_at	237.7	330.7	167.3	143.7	323.5	152.3	247.4	340.9	266.1	327.8	259.1	233.2	192	260.7	458.2	430.2	246.2	201.8
265053_at	214.4	213.6	182.8	533	518.2	471.2	690.7	841.1	695.2	414	407.8	348.5	810.7	1156.9	863.9	1146	1254	1081.6
265056_at	4009.4	3666.1	3956.8	3389.4	3762.6	3805.2	4146.1	3984.4	5038.2	3191.1	3677.3	2916.7	3807.2	3871.4	3865	3376.2	3568.6	3330.8
265057_at	171.1	275	281.3	138.4	142.2	149.8	200.1	172.3	204	198.9	147.1	195.4	241.1	195	155.1	202.6	148.8	102.6
265058_s_at	912	532.1	679.7	1484	1558.8	1776.2	2231.7	3084.9	2344.6	1766.6	1416.8	1052.1	3844	5148.7	3899.3	4374.1	3375.3	5482.6
265060_at	315.1	487.9	579.7	535.5	406	289.5	368	406.3	445.3	537.2	503.7	358.2	405.2	394.3	434.1	359.1	393.7	269.1
265061_at	170.6	156.3	221.7	192.3	193.3	172.8	230.9	245.7	270.5	192.8	170.2	130.9	130.7	126.5	130	179.6	168.1	135.2
265032_at	571.9	950	942.8	866.1	844.6	808.2	1021.6	1141.1	1101.2	527.1	489	418	442	522.7	370.7	730.5	552.6	383.9
265033_at	38605.3	37414.5	45694.6	43988.6	52409.9	38692.5	34839	28355.3	32359	46451.8	40748.7	41406.8	39611.5	30171.7	39169.9	35623.7	34499.5	34008.9
265034_at	216.6	235.9	243.2	282.6	290.9	168.2	284.3	212.6	281	305.4	263.2	234.6	208.3	203.5	251.9	268	205.9	247.8
265035_at	690.1	614.8	550.8	650.5	641.8	565.4	566.3	638.3	593.4	746.4	713.5	769	808.9	716.9	766.1	761.6	672.9	763.9
265005_at	102.7	61.2	111.6	95.7	96.2	103.1	132.2	83.4	134.4	106.9	101.9	107.5	114.1	99.7	96.2	122.1	117.8	58.3
265006_at	1532.7	1856.5	2057.3	1454	1715.8	1759.6	2415.6	2503.3	2851.3	1430.1	1430	1000	1079.9	1249.3	1191.6	1407.8	1638.3	1434.9
265010_at	2387.2	2885.8	3061.1	2175.7	2360.4	2115.1	2806	2855.5	2748	2085.7	2141.8	1653.2	2180.4	2160.8	2098.4	2102.7	2172.5	2184.2
265011_at	650.7	768.3	670.3	702.3	595.5	639.8	731	682.7	726.2	612.9	502.2	568.9	553.4	652.9	540.8	648.2	551.9	394.1
265013_at	244.5	272.7	261.1	259	204.7	204.2	212.8	250	263.1	213.9	253.5	239.7	334.6	321.8	263.2	209	207	183.2
265019_at	121.6	168.8	143	128.8	126.6	127.1	114.7	197.4	144.6	166.8	142.9	166.4	145.4	205	183.2	140	142.4	245.5
265026_at	4100.2	3647.1	3617.8	4947.4	5112.9	4969	3682.3	3636.9	4039.9	4318	3626.7	3858.1	3810.7	3150.4	3231.2	3777	3971.3	3640.5
265027_at	367.6	377.8	311.4	332.4	344.4	330.3	312.7	343.1	381.1	570.4	403.7	484	429.5	473.3	517.4	388.4	490.5	493.4
265029_at	476.6	496.2	474.5	470.5	459.6	518	467.4	477.8	472.6	410.8	446	427.7	540.2	428.3	454.5	353.3	465.6	427.8
265002_at	151	130.3	166.2	173.2	142.8	189.8	123.6	105.2	151.1	147.7	207	254.9	161.3	109.2	138.2	117.6	139.9	159.1
264974_at	152.5	223.3	184.9	122.1	158.8	174.1	205.6	220.9	218	195	202.4	219.8	117.2	161.9	157.3	196.5	235.1	205
264975_at	70.8	91.5	94.5	152	144.6	125.4	66.4	91.9	92.1	110.7	98.4	127.6	82.5	111.4	121.7	97	91.2	99.5
264977_at	1319.4	1156.5	1249.5	1497	1259.2	1453.7	1218.8	1269.6	1334	1373.9	1434.4	1574.6	1111.2	1126.3	1284.5	1332.9	1348.3	1444
264978_at	347	374.6	341.9	336.3	370.7	308.9	307.9	342.8	403.3	231.6	286	249.1	258.5	246.7	287.7	230.1	294.4	252.9
264979_s_at	64.4	76.1	74.6	93.4	105.5	81.5	92.3	80.3	116.8	142.6	90.1	91.5	115.1	103.9	93.3	68.2	104.3	94.7
264980_at	744.4	779.2	795	743.9	788.8	700.5	762.2	825.8	830.4	676.3	756	760.2	576.7	901.9	878.8	637.1	648.3	731.1
264984_at	1948.7	1458.6	1563.6	1370.3	1539	1540.2	1685.1	1712.3	2075.2	1799.8	1552.4	1593.9	1886.2	1842.7	2110.6	1799.6	1707.9	2000.3
264985_at	184.1	287.3	320.8	181.3	240.8	239	245.5	201.7	231.5	312	231.4	338.9	224.4	308.6	239.4	325.8	256.7	289.7
264986_at	844	911.7	919.6	825.2	684	1051.7	957	959.6	1021.3	1012.1	1017.2	1228.3	1259.3	1248.8	1499.7	1098	1001.7	1534.4
264987_at	688.8	842.2	956.3	1212.1	1005.2	1378.5	1148.6	1241	1087.3	1221.7	1315.3	1230.9	1186.6	1149.2	1361	1515.4	1532.9	1605.5
264989_at	204.3	173.8	115	93.6	134.8	148.8	201	224.5	192.5	209.5	192.6	284.2	431.6	416	393.4	277.7	176.9	305.1
264990_at	325.2	300.3	304.4	226	267.2	237.3	243.9	296.9	258.4	217	251	219.7	295	329.7	337.7	171.1	263.1	195.9
264992_at	298.2	339.7	398.4	614.7	505.5	475.8	331.6	315	301.6	888.1	620.8	649.2	445.4	383.7	451.7	574.7	743.1	748.6
264996_at	424.6	387.7	450.3	293.9	317.3	226.8	379.9	375.5	390.8	311.9	263.4	256.9	273.4	372.9	357.1	310.7	299.8	250.6
264999_at	312.9	213.6	232.6	291.6	250.8	181.2	261.9	292.2	235.6	319.4	245.2	409.7	271.7	317.6	444.3	278.7	243.5	297.9
265000_at	134.4	134.5	138.7	188.2	161.5	110	144.3	107.3	139.3	152.6	84.2	124.5	145.6	136.6	161.1	124.9	93.7	127.6
265001_at	4860.5	4936.5	5080.1	5063.2	4808.8	5437.5	5127	5296.5	4923.5	3823.3	4503.6	5314.5	5761.5	4863.1	4795.8	4584.3	5218.8	5493.1
264967_at	2040.3	2316.7	1964.2	1825.7	2159.5	2532.9	2114.3	2046.8	2034.2	2326.8	2000.3	2658.7	2043.8	2220.5	1979.6	2399.5	2664.4	2696.4
264968_at	1083.4	664.2	651.7	710.5	875.5	819.2	922.1	965	953	1532.3	1794.8	2394	2241.7	2079.7	2739.6	1565	1986.5	2881
264969_at	243.9	407.4	257.5	327.3	283.1	353.5	242.7	340.7	315.6	279.4	298.3	318.3	249.3	193.5	263.7	282.4	299.8	283.8
264970_at	4784	4959.9	4970.6	5557.9	5847	5361.8	4177.1	4004.4	4012.9	4214.9	5418.7	4782.1	3990.6	4994.7	4777	4750.1	5315.4	5643.8
264942_at	302.4	308	319.9	268.9	216.3	252.2	251.1	326.8	340.3	219.1	290.5	313.7	373.7	366.4	345.3	297.5	250.4	443
264944_at	331.3	378.5	392.8	350.3	368.9	434.8	327.4	365.5	280.1	375	389.1	583.3	365.3	454.2	370.8	443.2	517.2	555.6
264951_at	253.8	109.1	88.4	104.9	99.4	114.8	203	101.8	122.5	245.1	259.7	264.1	183.7	187.8	223	176	204.9	274.5
264952_at	902.3	1115.1	1059.7	1126.5	910.1	1016	1141.4	1142.7	952.1	882	935.7	1088.6	1073.5	1097.1	1118.7	992.4	1049.6	992.7
264953_at	255.6	262.7	327.6	275.6	326.3	324.6	406.7	471.7	410.5	466.1	416.9	549.3	660.1	780.7	596.4	755.8	884.3	791.1
264954_at	547.9	688.9	682	1563.1	1480.9	1470	675.3	636.5	645.3	1163	1063.9	876	540.9	489.9	486.7	1245.5	1288.9	957.5
264955_at	569.9	428.3	456.2	492.7	422.2	491.1	512.5	560.9	574.4	627.6	563.1	548.1	512.8	571.2	679.2	522	570.1	662.3
264956_at	1043.2	885.2	1057.1	992.1	1042	937.5	1076	1051	1110.2	1168.4	1089.1	1322.6	1465.8	1355.8	2065.3	1101.8	1275.1	1728.7
264957_at	317	352.2	430.6	305.5	365.7	275.1	320.5	448.4	385	514.6	480.5	508.8	555.3	553.4	551.2	454.1	484.3	634.8
264958_at	1991.5	354.8	336.4	675.9	836.7	706.3	512.6	550.1	617.2	2582.7	2515.4	3282.5	2222.1	2524	2770.8	1651.4	2133.9	2186.6
264959_at	2012.5	2312.1	2196.3	3009.1	2735.1	2937.9	1932.8	1812.2	1868.8	2721.9	2780.1	3155.8	1895.2	1892.2	1867.5	2297.3	2614.1	2936.7
264963_at	743.4	948	1024.3	1111.3	922.9	1122	816.7	872.8	946.8	923.3	811.8	728.2	810.2	758.7	660.3	829.5	818.6	615.6
264965_at	272.4	233.9	245.3	195.4	181.4	197	249.4	265.8	252.4	149	186.9	163.2	204.8	198.8	268.4	142.7	145.5	163
264911_at	341.4	427.5	392.5	418.5	461.3	373.3	340.8	358.9	354.3	393	445.5	357	402.9	403	348.3	402.8	373.7	370.4
264913_at	434.2	551.8	504.5	599.6	423	415.8	505.5	595.3	599.1	376	395.6	311.4	373.4	403.9	368.3	384.8	364.9	354
264914_at	2205.7	2126.5	2171.4	1984.9	1761	2487.4	2137.7	2192.1	2264.5	1917.3	2142.4	2529.3	2349.6	2425.1	2195.4	1935.4	1879.8	2086.5
264916_at	429.6	508.1	451	501.1	524.3	506.9	478	499.1	528.4	441.8	604.4	503.4	385.4	426.1	477.7	535.8	603.5	420.8
264920_at	1573.6	1734.5	1930.2	2597.1	2939.6	1902.2	1927.8	1870.7	1981.2	2009.2	1980	1702.5	1132.2	1296.4	1193.9	2111.3	2052.9	1516.1
264921_at	362.8	240.7	230.9	368.9	233.1	343	274.1	269.4	302.3	264.1	201.1	275.9	272	282.1	246.7	242.7	339.7	211.9
264922_s_at	476.4	445.1	465.5	549.2	570.1	551	419.3	440.4	434.5	611.8	644.1	668.1	416.5	475.4	515.2	620.8	565.8	549.6
264925_at	146.5	106.9	161.2	156.3	157.4	85.3	130.9	137.8	174.6	139.3	182.3	232.7	136.4	150.7	124.8	179.6	169.3	176.6
264926_at	862.8	1098.4	1017.8	872.1	1029	940.2	1104.4	1355.4	1182.2	1051.2	978.7	795	863.6	848.9	945.1	957.7	975.7	685.7
264927_at	464.4	275.6	298.5	315	360.9	321.6	263.3	298.5	280.7	388	381	518.5	441.2	461.3	470.3	342.9	399.4	430.6
264928_at	1458.7	1580.7	1710.3	1740.9	1691.6	1703.5	1570	1627.5	1683	1448.1	1698	1708.1	1624.8	1471.8	1401.2	1445.7	2015.4	1837.1
264930_at	574.2	613.5	589.8	729.2	643.7	727.6	524.1	606.2	628.5	631.8	639	646.7	604.7	600.8	660.5	539.1	546.2	564
264931_at	485.8	737.8	890.6	523.1	592.9	485.8	529	510.2	453.8	495	525.4	478	390.2	339.4	343.6	322.5	461.7	419.4
264932_at	217.1	258.3	247.4	256.4	391	382.6	206.5	320.8	331.8	302.6	227.2	235.1	264.2	260.4	293	284.7	227.4	348.8
264935_at	537.3	494.2	478.5	491.1	469.3	549.6	531.3	468.1	514.7	409.4	576.2	704.6	766.4	532.8	540.2	616	598.6	672.6
264936_at	686.3	413.9	449.8	291	294.3	256.9	542	515.3	556.6	405.2	406.8	408.9	575.2	609.6	667.7	321.4	348.9	410.6
264910_at	587.4	498.2	522.9	386.3	340.4	365.2	533.9	506.6	526.3	367.9	391.4	385.8	344.2	462.8	404.3	359.8	377.3	338.4
264883_s_at	1252.3	738.6	607.4	755.6	690.1	929.5	866.6	853.2	871.9	1178.4	1124.5	1312.5	1222.6	1246.8	1336.1	1183.2	1255.9	1405.5
264884_at	91.2	69.1	116.4	62.2	95.8	78.9	89.2	83.2	85.5	110.2	107.3	148.1	97.8	132.6	92.7	77.5	130.1	117.5
264885_s_at	1135.7	1025.3	879.8	720.5	614.8	1111.2	1319.1	1022.4	1178.3	959.4	1241.1	868.4	1012.7	1230.1	1115.4	1067.2	949.1	710.3
264890_at	613.6	915.2	621	1004.8	641.8	851.5	803.4	728.8	692.7	641.9	801.7	630.4	538.6	622.5	632.1	683.4	542.9	705.8
264893_at	181	96.7	96.9	143	131.8	155.6	130	118.5	123.5	274.6	258.4	259.2	219.8	221.1	212.4	207.8	232.6	172.2
264894_at	298.8	308	274.8	207.7	263.4	262.7	259	269.9	244.4	217.8	317.4	347.4	409	424.7	419.7	454.5	364.4	567.1
264895_at	147.4	103.8	154.5	237.2	139.6	130.9	217.5	199.7	176.5	73.9	112.6	65.2	76.5	78.7	44.3	168.3	140.2	88.3
264897_at	994.9	1059.2	1036.3	1157.5	1226.5	918.5	1012	927.2	935.6	1312.1	1037.8	1158.9	927.4	996	975.6	1060.2	1115.6	1150.9
264898_at	496.5	915	700.1	891.6	878.9	800.3	956.8	1169.8	972.2	386.6	506.6	295.2	380.4	456.7	293.2	583.6	564.7	298.7
264899_at	8469.4	8073.6	8950.8	8723.9	9744.7	8151.6	6873.1	5911.3	6508.4	12819	12593.8	15236	11920.7	10089.6	13230	9405.4	9102.6	12660.4
264900_at	763.8	997	892	623.9	516.7	818.1	569.3	842.5	719.7	559.7	614.2	812.8	898.8	1176.2	1121.8	601	666.4	846.6
264901_at	785.8	632.7	806.1	704.3	655.7	456.3	667.5	706.5	631.1	425.5	528.5	464.8	490.8	525.5	603.9	638.6	592.4	695.8
264903_at	3767.1	4106	3704.3	3638.2	3452.3	2902.8	3926.8	4054.5	3802.3	3375.5	3181.4	3038.8	4334.5	4549.8	4248.6	3316.9	3668.8	3287.5
264904_s_at	1374.5	1339.6	1346.8	1221.6	1154.9	1507.4	1190.8	1192.2	1404.1	1231.6	977.6	1729.8	1628	1114	1581.9	1032.7	1082.2	1426.7
264907_at	145	119.8	117.2	164.8	143.3	130.6	96	123.2	111.4	145.7	246.4	256.8	141.6	161.1	255.7	173.3	318.9	322.5
264908_at	177.7	174.7	117.9	156.4	154.4	144.3	139.8	167.9	128.1	74.5	155.3	122	136.1	177.7	132.1	145.5	116.2	134.9
264909_at	88.1	46.3	51.5	137.2	45.5	58.4	105.2	149.5	106.5	111.3	99.2	99.2	71.7	68.9	65.4	122.8	79.1	40
264875_at	3097.6	3134.2	3202	2872.4	3091.7	2856.8	2920.9	3063.9	2969.2	3186.4	2817.3	3164.8	2945.8	3292.4	2464.1	2956.9	3239.1	3104.3
264876_at	155.3	185.7	160.1	182.9	127.5	158.6	127.7	196.6	183.7	118.6	113.2	117.2	163.5	150	162.2	94.6	183.3	119.7
264878_at	647.5	778.1	793.3	637.3	770.5	562.2	766.2	696.7	622.1	670.4	600	406.5	507.4	565.8	600	571.6	499.9	543.6
264847_at	1310.3	1266.2	1253.2	1235.3	1364	939.6	1144.9	1172.4	1276.2	1062.3	1122.5	1138.2	1545.8	1129.5	1412.8	1318.1	1518.5	1549.4
264848_at	260.6	328.3	318	379.7	364.7	281.9	288.4	339.6	322.3	380.9	368.6	418	333.8	332.7	413.3	428.6	514.4	430
264849_at	2744.9	3469.5	3296.4	2896.9	3416.4	2822.5	3739.3	3580.9	3384.1	2746.3	2286.2	2014.5	2084.3	2104.1	1604.2	3062.1	2675.8	1905
264850_at	1804.1	1758.2	1887	1540.8	2091.9	1424.9	1587.7	1525.5	1620.4	2093.1	2205.4	2025.2	1991.5	2013.5	1738	1913.4	1316.5	1802.8
264852_at	205	279.6	225.6	480.6	289	418.2	355.7	332.4	253	316.4	262.4	297.1	493	368.4	326.8	435.6	581.4	366.9
264854_at	1209	1151	1091	1027.2	1114.6	1091.6	1108.7	1078.1	791.7	1091.5	1027.9	1214	1586.3	1224.6	1576.4	992.8	1050.2	1156.6
264855_at	995.7	1125.2	983.7	1112.6	1169.2	1054.9	1121.7	1119.4	1141.3	1097.9	952.4	934.8	1146.8	1225	1124.8	911.7	1165.5	1163.3
264856_at	184.8	157.5	161.1	235.4	126	175.9	165.4	175.2	175.4	131.8	175.6	209.5	215	177.4	201.3	128	164.7	156.2
264818_at	219.9	234.7	265.7	365.4	164.6	246.8	289.8	229.3	321.2	203.9	213.4	164.7	204.6	185.1	184.9	189	159.3	165.9
264820_at	2694.9	2872.2	3239.4	3349.4	3281.6	3348	2573.6	2534.2	2420	3220.2	2934.8	2386	2080.2	1950.7	1681.8	2719.6	2109.6	2121.5
264824_at	813	743.2	610.2	628.7	756.9	596.4	810.3	862.3	752.7	753.7	732.8	768	659	663.1	663.6	820.8	711	742.2
264828_at	305.5	208.1	228.9	195.1	185.9	152.1	206.9	227.1	213.3	244.3	284.7	361.2	389.9	335	400.3	324.4	295.1	322.9
264831_at	183.2	210.1	245.6	245	313.6	302.7	209.8	199.9	214.6	177.4	199.5	170	134.7	155.9	122.6	179.6	188.5	150.1
264834_at	448.8	464.2	397.2	369.1	499.4	433.8	404.5	394	599.6	490.1	379.6	459.6	402.2	468.9	336.9	453.4	348.6	391.6
264835_at	86.6	79.8	37.2	127.8	113.7	118.6	73	52.9	45.6	141	135.1	165.7	107.5	104.2	177.9	133.2	138.4	147.7
264836_at	428.2	423.8	374.5	411.7	423.4	401.9	388.2	370.8	417.3	388.1	485.9	371.4	523	412.1	443.3	329.4	451.4	397.7
264837_at	16183.9	18206.3	14870.5	18830.5	17535.2	19728.3	17593.8	14159.1	14302.7	13087.5	14583.4	18065.2	16443.4	14830	13414	14251.8	17656.2	15117.2
264838_at	468.9	342.7	309	402.9	389	324.2	326.5	342.4	314.6	570.7	580.6	787.4	561.3	630.1	602.9	497.2	507.3	716
264839_at	6144.2	6609	6659.9	8233.5	8008.2	7417.5	5763	5714.3	4711.8	8097.9	7177.2	6146.9	5165.4	5359	5104.9	6243.9	6735.7	5632
264840_at	310.8	305.6	315.4	216	226.8	230.2	262.9	238.4	257.9	185.2	169.1	278.9	242.6	260.5	196.2	168.2	171.2	220.8
264841_at	253.7	140.5	171.2	147.5	213.6	258.7	179.8	210.7	157.4	200.8	218.8	276.4	337.9	329.1	440.7	203.5	206.5	297.5
264843_at	876.6	402.6	327.6	532.2	486	482.4	411.3	357.7	442.4	878.6	904.4	959.5	769.9	634.4	796.1	494.1	643.2	798.9
264844_at	168.3	134.3	201.5	198.4	134	131.3	138	124.9	156.3	137.5	161.6	232.9	156	160.3	165.2	182.5	168.1	209.9
264845_at	8161.8	9833.8	10329	9984.1	11824.4	9623	8502.8	8048.2	8265.7	10537.4	9778.3	10026.4	8180.6	8272.5	8806.1	8045.6	7908.4	7828.4
264787_at	1716	1244	1275.7	1678.2	1729.6	1874.5	2498.8	2847.9	2010.8	1909.7	2313.9	2472.8	3613.5	3096.4	3105.2	5443.6	3545.4	4027.8
264789_at	1274.3	970.7	836.3	1007.6	880.9	1377.3	914.3	1070.3	1090.3	835.8	1026.9	871	910.4	984.5	957.3	984	888.8	900.3
264790_at	429.9	403.3	395.3	319.8	313.3	311.4	374.6	396.7	352.7	396.9	378.6	483.6	425.3	457	480.5	392.1	322.2	305.7
264792_at	435.7	362.3	287.3	264.2	248.4	193.4	376.5	356.6	316	244.4	298.5	317.2	387.8	397.1	512.8	229.4	273.5	234.9
264793_at	558.8	705.4	701.8	661.6	671.3	531.6	661.2	652.8	724	613.2	586.6	418.9	596.5	528.4	581.7	573.4	636.7	509.1
264796_at	455.3	443	443.9	489.7	396.9	462.8	478.7	519.6	499.8	438.5	523	432.7	451.2	548.2	502.8	467.4	424.2	414.2
264799_at	2575.3	2772	2309	2413.3	2659.1	2083.2	1871.3	2209.3	1983.5	2733.9	2613.3	2544.5	1861.2	2326.6	2217.8	1969.8	2050.1	1998.6
264801_at	96.9	116.1	106.9	167.8	144.3	121.2	79.8	99.6	116.6	85.9	94.8	112.1	86.8	94.8	90.4	110.3	100.8	110
264802_at	763.5	1009.3	1160.9	862.5	786.4	1037.7	820.7	914.1	974.2	737.3	731.7	665.2	557.6	524	556.9	658.8	698	522.5
264803_at	541.1	868.1	821.1	962.6	950.3	886.7	962.5	1026.1	952.7	623.1	680.6	649.3	565.5	513.9	481.8	812.4	534.2	650.9
264805_at	165	117.9	131.3	121.8	100.6	146	142.5	136.2	143.2	155.2	164.7	136.9	123.3	130.6	142.1	111.8	190.1	85.7
264806_at	135.6	120.8	169.1	209.5	200.3	182.9	227.5	196	275.7	168.9	147	132.2	96	145.8	136.9	184.5	141.5	146.9
264807_at	460.2	372.6	328.7	250.9	325.2	439	385.3	389.5	428.9	417.6	420.3	353.9	497.7	403.6	438	331.7	334.6	423.9
264808_at	412.1	371.8	364.2	369.3	319.6	382	354.9	348.7	412.9	298.3	344.2	469.7	493	463.2	511.6	370.3	445.3	534.4
264809_at	5378.5	1236.8	1717.2	2706.9	1608.8	3191.5	4232	2207.4	3518	6862.5	6206.5	8880.2	9065.8	7795.3	5987.2	5044.4	6241.6	7002.7
264810_at	632.5	529.5	519.9	472.9	512	449.6	561.7	558.2	516.8	629.7	511.2	464.2	469.9	502.9	449.9	604.7	563.6	370.6
264811_at	2450.1	3192.3	3425.5	3959.7	2974.3	4134.8	3186.4	2992.6	3088.2	3101.1	2786.8	2741.9	2445.6	2317.4	1883.9	3261.2	2585.1	2361.2
264778_at	427.3	429.1	443.6	650.5	425.8	566.6	420.8	460.9	418.9	521.2	561.6	559.3	336.7	387.6	412.6	395.6	718.1	521.4
264779_at	680.6	566.2	646.9	470.9	501.5	523.8	531.7	514.6	538.2	873.5	815.1	1088.4	737.5	816.2	886.9	1055.7	773	1134.5
264780_at	136.5	144.5	136.8	174.8	103.8	177.4	148.4	185.6	147.4	113.3	169	149.6	235	225.4	246	195.7	153.8	138
264781_at	1899.4	2152.6	1993.4	2128.1	2244.4	2426.5	1729.1	1837.9	1568.7	1681.3	1947.6	1352.1	1097.9	1431.2	1207.8	1728.5	1584.1	1231.9
264782_at	205.1	167.7	166.3	204.6	206.9	144.5	144.7	143.8	158.5	218.1	181.5	228.7	178.4	156.1	173.9	167.4	156.3	132.6
264783_at	659.5	598.8	578.1	535.5	497.3	644	560.3	527.8	527.8	797	664.5	893.5	680.6	570.5	623.7	743.2	932	805.9
264757_at	245	93.1	149.3	123.7	119.4	117.5	161.1	130.2	182.2	176.8	105.1	160	192.4	170.7	225.3	214	98.9	150.9
264767_at	236	174.3	147.2	180.4	151.1	148.3	156.8	166.7	168.7	191.1	250.4	260.7	201	190.2	211.9	235.9	243	277.6
264769_at	326.7	367.1	232.2	309.5	305.3	173.8	208.4	283.4	339.5	288.6	241.5	177.4	263.3	253.8	319.8	207.4	300.8	224.8
264770_at	359.4	407.7	445.3	418	277.3	281.8	500.6	511.4	475.3	281.2	265.5	289.2	549	431.2	389	290.5	355.9	304.1
264771_at	516.4	388.6	414.8	927.2	681.2	788.3	410.2	377.2	499.2	804.3	676.2	829.5	549.8	590.3	422.4	622.9	632.2	702.6
264772_at	559.7	284.3	338.3	210.1	245.2	180.6	345.8	392.8	376.5	481	315.5	543.6	674.4	661.2	898	380	448.7	520.9
264774_at	391.8	165.6	206.7	196.9	260	221.9	185	175.2	233.6	320.1	318.5	384.3	267.6	391.4	387.1	425.7	371.9	372.5
264776_at	254.9	166.9	175.5	208.4	181.3	198.2	216.7	188.6	206.4	151.3	173.1	245	258.7	204.9	254	142.4	193.2	261.2
264750_at	122.6	137.4	158.2	124.7	84	118.5	106.1	123.8	103.1	106.5	139.1	166.2	165	141	177.4	111.6	113.1	161.6
264751_at	201.4	159.1	142	188.9	200	155.6	233.8	187.1	339.6	183.2	162	130	238.7	230.6	158.5	197.2	277.3	136.4
264722_at	193.8	206.8	223.3	235.6	266.8	339.8	270.2	332	326.3	216.9	231.2	215.1	256.7	208.9	241	278.3	264.5	271.3
264724_at	1055.6	1208.7	1321.3	1034	1138.6	973.8	1117.1	1070.6	1237.1	1050.6	1036.6	847	1285	900.1	975.9	935.7	1060.4	981.5
264725_at	424.4	339.8	271.6	392.4	361.1	452.6	326.1	325.8	309	317.2	382.1	417.7	410.7	359.7	396.3	373.6	344.8	364.6
264727_at	7749.6	7768.9	8652.1	8832.2	10206.4	9508.8	9118	8736.8	9184.6	8277.1	7196	6647.8	7070.1	6925.9	6717	8428.1	8369.3	7468.6
264728_at	5260.5	5206.5	3419	3996.9	3332.5	3719.4	3856.4	3613.4	3451.9	3496.5	3460	3217.8	3360.9	2954.2	2724.9	3105.7	3232.4	3297.7
264731_at	226.6	310.3	344.5	337	239.7	273.8	244	293.1	303.8	203.7	186.4	202.7	214.5	179.2	209.8	209.2	155.5	196.4
264736_at	450.1	462.6	464.3	559.9	513.8	569.6	582.4	562.3	584	679.1	573.1	683.4	762.5	716.4	842.1	620.3	629.9	645.2
264738_at	696.3	693.6	615.4	694.4	681.3	791.2	414.9	511.6	481.1	805.3	830.9	1054.3	839.4	740.7	917.7	659.7	891.9	902.3
264745_at	3109.9	2528.4	2745.4	2735.4	2432.4	2464	3163.6	3137	3106.5	2156.8	2111.2	2048.8	2450	2737.8	2559.2	2343.3	2471.8	2528.5
264748_at	677.9	730.1	665.1	655.9	651.9	696.7	667.8	640.4	670.7	620.2	635.8	798.9	440.7	563.4	493.7	700.9	552.1	511.4
264715_at	123.2	226.4	165.6	180.1	96	153.3	142.9	180.4	132.6	143.1	90.3	148.1	236.4	193.7	190.9	147.7	128.1	105.1
264690_at	203.1	194.4	217.6	185.1	157.3	146.7	145.9	114.8	216.7	133.4	174.6	116	168.6	148.3	171.2	159.1	171.7	147.1
264696_at	333	356.9	357.7	248.1	327.6	372.3	329.7	394.2	371.3	224.4	240.4	202.2	315.9	347.7	337.7	223.6	289.1	303.1
264697_at	282.5	335.1	414.3	170.1	206.6	218.7	221.8	208.7	240.6	216.5	192.4	174.9	203.3	200.5	198	239	135.3	189.5
264698_at	640.7	753.8	942	842.2	953.3	612.3	863.2	818.6	901	620.1	562.2	361.5	334.9	561	470.2	664.4	657.2	448.8
264699_at	335.6	306.4	335.5	303.2	346.4	344.9	345.9	338.6	322.4	368.7	404.3	418.9	401.6	380.7	382.1	396.2	485.4	400
264700_at	292.5	324.8	326.6	239.1	272.1	207.3	240.7	310	286.7	234	252.7	225.5	190.5	331.3	305.6	222.6	242.2	270.7
264713_at	111.9	111.9	102.9	116.1	99.5	110.7	125.1	95.6	73.4	77	155	99.3	137.1	67	101.8	115.6	56	74.4
264686_at	609.2	581	561.3	863.8	720.5	657.5	600.6	606.9	545.6	951.3	742.7	972.7	741.2	611.7	691	822.6	747.8	954.5
264687_at	1254	1194	1121.3	1381.3	1218.8	1313.3	1304.9	1474.3	1312.7	1415.5	1406.1	1058.6	1417.1	1502.2	1186.6	1315.3	1329.4	1197.5
264689_at	861.5	952.4	811.1	755.9	630.1	493.4	777.2	850.1	809.6	455.5	528.3	349.2	459.4	477.5	503.6	500	512.4	331.1
264658_at	292	356.6	255	276.4	371.5	340.4	226.5	255.1	225.9	402.9	399.4	392.4	537.7	443.4	526.3	250.2	328.6	518.2
264662_at	153.3	117.4	115.2	142.9	130.3	144	115.8	124.5	138.1	132.4	110.3	158	131.6	117.3	128.1	134.5	136	112.6
264663_at	1099.3	414.2	706.4	324	328	311.1	645.2	658.5	680.2	459.1	497	567.3	941	1103.9	1393.3	591	643	833.5
264664_at	454	556	687.4	748.6	651.2	709.9	514.3	499.4	553.4	454.9	473.1	427.6	369.2	367.6	347.9	510.7	400.8	419.2
264581_at	371.7	454.6	447.2	396.3	310.2	360.4	468.2	408.2	473.7	257.7	356.5	303.7	288.1	257.8	239.5	307.6	271.6	303.9
264582_at	261.9	228.6	180.5	226.2	237.7	202.8	242	219.4	248.9	152.5	181.6	188.7	287.4	169.6	231.6	256	166.5	201.2
264583_at	194.4	240.5	178.8	118.8	158.7	270.5	234.6	211.7	149.9	213.3	226.2	294.4	251.3	171	404	139.1	175.5	291.1
264584_at	1770.4	1540.5	1443.3	1505.5	1722.7	1630.1	1376.2	1501.7	1333.1	1850.2	1646.6	1655.2	1519.9	1562.4	1420.3	1669.9	1293.5	1102
264585_at	829.9	872.4	834.3	732.2	789.8	789.3	849.6	900.4	1022.7	787.5	857.8	832.9	1008.4	912.3	875.6	804	862.4	790.6
264586_at	99	159	140.7	154.5	170.8	171.3	129.7	113.6	142.2	156.3	179.8	194	207.5	169.8	154.9	159.1	144.5	207.3
264587_at	446.5	503.6	547.9	437	419.1	481.8	493.4	494.3	496.1	371.8	498.8	488.1	539.4	501.2	586.7	371.9	466.1	446.1
264561_at	323.5	442.3	437	306.5	442	463.8	426.6	439.6	381.7	423.2	320.6	358.2	301.6	315.7	253.1	446.1	454.9	379.3
264563_s_at	91	47.6	92.1	119.4	129	88.7	95.6	113.4	125.5	113.8	114.9	131.4	100.3	79.9	88	127.5	132.1	136.5
264533_s_at	243.2	151.5	131	181.1	157.6	119.6	148.6	156.8	180.3	201.3	189.4	181.2	191.3	193.8	185.2	191.9	116.7	135
264535_at	230.1	381.8	352.8	340.2	229.4	373.7	399.6	440.7	429.8	273.9	251.5	328.1	271.8	321.8	318.7	252.5	212.7	246.2
264398_at	1779.8	2085.3	1906.5	1917.3	1741.7	1519.5	2115.8	2110.5	1973.8	1565.7	1712.3	1361.9	1480.4	1870.8	2003.3	1821.5	1650.9	1529.8
264399_at	1606.9	1355.5	1611.6	1697.9	1703.5	1897.4	1490.5	1099.7	1618.5	1784.9	1681.2	1731.3	1184.8	1406.6	1500.2	1766.7	1454.9	2000.3
264400_at	657.9	245.9	184.9	431.2	472	416.2	828.8	928.8	823.1	506.3	596.1	786.8	1467.7	1590.3	1440.6	1241.1	1507.2	1619
264374_at	418	344.7	497.9	354.1	273.6	361	342.3	385.8	213.2	304.8	334	387.4	295.2	369.1	340	291.5	248.8	305.3
264268_at	782.9	683.8	649.4	665.6	654.6	695.2	641.3	678.5	752.2	845.5	639.8	811.8	660.1	809.2	862.1	689	790.4	950.3
264270_at	165.7	193.3	222.1	191.7	241.6	230.7	191.9	203.8	211.2	212.9	310.7	254.7	261.8	225.7	256	311.5	356.6	358.2
264271_at	112.5	109.2	184.5	154.8	191.9	170.7	97	141.3	110.8	123.1	151.4	202.7	110	178.3	106.1	169.5	186.2	135.7
264665_at	486.6	625.6	570.4	680.9	672.5	638.9	476.4	548.7	528.4	456.9	480.2	470.7	404.3	403.9	359.5	533.2	481.2	426.7
264667_s_at	471.7	514.9	519.2	559.6	389.4	467.7	490.3	520.5	443.2	523.7	526.5	563.7	574.3	532.7	557.7	532.9	566.5	594
264668_at	4328.3	4752.8	5002.5	4738.4	3811.3	5519.9	5501.6	5431.9	3968.2	4325.2	3913.9	4706.4	3938	4389.8	3695.3	4151.2	3797.9	3978.4
264669_at	885.5	811.3	847	743.7	771.2	840.7	765.2	806.5	722.5	854.1	760	915.1	939.6	871.4	870	671.5	762.5	809.8
264670_s_at	9020.6	11609.2	11967.4	11361.2	9237.5	10441.5	9802.3	10441.5	10397	10256.8	9837.6	10785.8	8237.7	8817.6	7800.8	10880.9	9436	8497.5
264671_at	495.6	417.7	456.9	552.2	555.6	508.2	478.8	457.8	360.4	650.5	624.3	652	596	508.5	668.7	577.9	678.3	823.2
264672_at	7778.3	8376.4	10225.9	8889.3	8877.4	7262.6	9218.2	9068.8	9294.3	8437.9	7710.3	5731.4	6522.5	6512.3	6871.1	6991	6734.8	5726.9
264673_at	1599.5	1963.4	2085.8	1662.2	1828.8	1247.4	1517.5	1399	1390.9	1316.6	1180	1201.5	1120	1205.6	1130.4	1317.8	1167.5	1238.4
264674_at	703.2	744.8	745	668	688.8	735.3	700.1	703.6	701.5	786.3	692.6	1098.4	737.9	695.4	759.4	819.9	776.6	1052.4
264675_at	596.6	563.6	574.1	721.8	543.9	602.5	573.6	664.8	564.9	497	568.7	507.2	475.4	475.2	573.7	635.1	431	541.3
264676_at	361.2	371.6	313.8	377.3	305	377.2	377.9	363.2	339.4	363.4	378.9	316.2	312.2	310.9	337.5	379.3	394.9	402.8
264678_at	609.2	797	784.6	885.6	842.9	826.4	703	780.3	658.2	669.8	651.1	630.3	733	591.6	582.3	690.6	714.1	643.4
264679_s_at	5972.2	6471	9474.2	8233.4	7042.3	7745.1	8024.5	8162.6	7228.8	6105.3	6337.7	5059.3	3997.5	4348.9	4093.9	6861	5381.6	4466.6
264683_at	752.8	742.9	774.5	721.7	422	621.7	720.6	733.7	717.3	735.7	781.3	715.7	795.4	959.3	994.3	562.3	701.8	839.3
264628_at	439.9	235.8	200.9	342.3	287	359.3	295.6	309.2	386.9	396.4	554.3	476.2	333.9	439	425.8	381.3	352.4	603.8
264629_at	361.7	318.1	366.1	141	191.7	234	321.5	275.3	337.2	386.8	294.6	372.6	342	455.6	354.4	308.2	317.9	266.3
264633_at	491.3	350.3	503.8	434.8	467.4	379.4	391.3	466.2	495.3	427	487.2	695	412.1	407.9	539	489.4	495.8	623.6
264636_at	871.8	507.4	523.4	793.8	754.8	759.9	1558.1	1306.7	1424.5	825.3	890.5	936.6	1103.6	1007.8	995	1399.7	1373.8	1134
264637_at	196.9	198.2	136.9	293.6	205.3	168.6	163.3	174.2	252.6	199.4	169.8	117	205.5	119	172.9	180.6	128	142.4
264639_at	434.1	435.2	424.8	386.8	508.2	464.2	435.8	399.2	454.4	430	393.2	461.9	430.1	445.2	448.9	468.3	463.7	432.5
264641_at	3450	4089.2	3475.4	3883.9	4510.6	3651	3104.6	3275.7	3434.9	4036.9	3884.1	4260.2	3783.9	3676.4	3490.7	3787.5	3872.7	3612.3
264644_at	252.2	253.7	225.7	283.5	117	250.9	287	219	308.8	189.2	281	189.9	250.8	199.7	189.8	151.5	188.7	179.4
264645_at	127.7	63.4	49.1	66.1	98.8	91.7	65	76.2	77.7	131.9	112.1	162.1	76.5	121.4	120.5	154.9	152.8	122.7
264649_at	412.3	396.5	421.2	367.3	313.9	510.7	407.4	392.1	345.1	473.5	285.3	414.5	429.9	426.8	525.9	355.7	373.1	382.5
264650_at	997.2	1039.7	964.9	842.6	813.5	1133.7	988.1	1104	918.2	974.3	929.2	1042.4	1110.2	1000.5	1078.8	1085.2	1026	1112.9
264651_at	1828.5	2671.2	2642.6	1958	1962.3	2258.4	2244.8	2262.5	2160.1	1821.8	1993.8	1942.6	1783.8	1924.1	1787.4	2086	1884.8	2006.8
264652_at	325.6	262.8	320.5	348.2	354	440.6	283	338.3	294.6	360.1	269	326.4	401.6	370.9	506.2	502.2	388.9	384
264653_at	1307.9	1542.3	1614.6	1839.8	1477.3	1687.3	1247.4	1282	1304.8	1545.2	1652.3	1424.6	1712.3	1650.5	1362.5	1506.7	1446	1409.7
264654_s_at	162.7	156.9	169.3	154.9	187.3	239.6	171.4	202.6	124.6	267.3	318.1	374.4	337.5	290.7	270.4	351.5	293.8	461.3
264655_at	3040.4	1842.7	1786.6	1919.2	1879.7	2577.3	3708	3631.6	3436.6	2158.6	2168.9	3440.5	4021.4	3883.6	4285.5	3831.9	4083.9	4385.3
264656_at	750.8	760.7	859.3	840.8	715.5	814.3	768.8	743.5	811.4	835.4	842.5	884.9	745.7	849.7	697.6	810	904.1	807.4
264657_at	465.8	359.5	309	388.3	399.4	369.1	376.4	457.4	390.1	487	435.3	543.5	525.1	386.1	552.9	498.9	456.7	589.2
264624_at	2437.8	930.3	1057.1	1406.5	1417.4	1400.4	1647.1	1505.4	1819.8	1894.6	1566.1	2046.5	2454.3	2106.7	2768.6	1988.4	1811.3	2216.3
264625_at	145.5	165.5	158	193.9	219	259.9	181.8	155.3	195.7	269.3	269.4	247.4	181	164.7	147.7	205.9	239	273.5
264595_at	1691.8	1525.2	1473.1	1464.8	1879.2	1452.5	1636.7	1718.8	1676.6	1623.2	1697.8	1653.8	1898.6	1709.2	1893.8	1921.9	1859.1	2104
264597_at	601.9	917.5	788.5	787.5	767	750.8	638.8	680.7	625.5	720.5	718.4	695.7	865.4	655.5	628.6	607.6	522.7	597.2
264600_at	163.9	158.5	137.3	98.4	204.2	126.3	160.3	172.1	142	151.4	136.8	152.4	121.6	97.6	89.1	134.2	105.7	144
264605_at	189.4	202.5	199.8	215.8	193.2	258	221.9	244.8	235.7	193.6	267.3	323.3	194.8	198.3	221.6	187	151.5	180.7
264607_at	4877	5141.2	4733.8	3784.8	3204.4	4675.5	4381	4343.1	4336.7	4255.6	4011.1	5789.4	5890.7	4741.9	5325.6	3271.6	3884.1	4858.8
264608_at	826.8	881.9	746.1	832.6	881.4	909.2	827.9	868.4	941.3	657.9	600.4	603.3	782	719.5	660.9	685.8	657	583.3
264609_at	1075	826.8	841.9	648.9	676.6	660.7	672.4	559.8	600	940.2	890.6	947.8	698.1	749.5	1062.9	731.1	650.9	828.1
264611_at	2593.3	2397.8	2513.6	2056.8	2092.6	2170.2	2539	2599.9	2526.5	2267.4	2522.3	2565.4	3251.2	3101.7	3045.5	2305.1	2378.2	2557.3
264613_at	1262.4	1583.4	1343.7	1450.5	1668.6	1477.5	1261.8	1249.5	1201.2	1542.3	1605.1	1189	926.5	1173.8	713.3	1418.1	1116.8	1121.5
264615_at	453.3	428.4	451.3	559.1	436.1	500.2	537.1	550.6	634.3	443.1	364.4	388.6	372.4	457.9	407.4	440.9	483.1	368.5
264619_at	370.5	353.1	356.3	450.2	419.9	425.6	361.6	402	437.9	412.2	454.3	461.2	448	512.2	421.7	496.6	471	476.6
264621_at	153.1	204.5	168	133.9	130.1	170.2	183.3	169	164.8	173.5	149.3	289.9	215.7	182.2	216.8	136.5	147.2	257
264622_at	412	300.6	270.9	341.4	296.9	309.5	317.3	341.5	310.5	210.8	396.4	298	422.3	397.1	412.9	417.9	298.9	432.8
264588_at	282.7	239.9	256.7	277	301.4	272.7	314.8	342.6	295.5	318.2	353.4	343	387.8	309.6	357.7	343.5	367.2	366.2
264590_at	231.6	183	136.5	198.1	256.5	198.1	163.6	131.2	118	279.5	345.4	687.1	383.9	259.6	707.3	245.7	307.4	417.4
264591_at	280	348.3	506.8	465.1	278.9	570.9	383	541.7	555	335.3	249.4	412.1	349.6	302.5	287.6	319.5	400.5	342.2
264592_at	925.2	597	507	643.9	507.9	696.3	786.6	771.2	761.7	739.8	751.9	774.6	877	781.4	880	707.8	786.7	774
264593_at	617.2	719	595.8	668	630.9	747.3	703.5	684	716.8	606.2	576.4	713.8	783.8	620.3	607.2	632.9	577.3	587.9
264594_at	256.7	304.7	328.2	339	332.9	351.8	227.8	231.9	281.8	407.8	411.8	399.3	240.7	266.9	299.2	381	337.7	365.1
264566_at	330	289	355.3	326.2	322.8	314.9	248.2	319	333.4	239.2	281.6	321.8	254.6	308.6	318.5	366.8	193.8	246.4
264568_at	454.4	514.4	426	349.9	323.6	312	506.2	454.2	433.1	287.2	395.1	262.4	418.7	613.9	564.9	295.2	345	392.2
264570_at	336.8	338	375.1	353.1	365.7	256.7	380.5	494.4	324.1	333	362.2	310.2	336.3	343.8	336.1	280.5	375	303.3
264572_at	406.6	261.4	247.5	284.4	373.3	326.5	394.4	410.5	387.5	423.3	567.6	310.7	408.5	281.8	478.6	378.6	364.9	370.5
264575_at	7236.7	8518.5	8502.9	9276	11155.2	8308.9	7509.9	7377.5	7609.4	8648.7	8406.6	6047.7	5401.5	5396.3	5687.7	8796.9	7431.8	5715.4
264576_at	255	253.8	182.9	356.1	258.1	376	248.4	279.8	291.2	271	277.1	261.6	251.1	239.6	305.1	318.1	228.9	290.4
264579_at	492.3	494.1	695.9	656.3	659.1	627.6	554.2	622.1	607.6	596.8	620.3	560.2	522.3	463.3	593.9	735.3	671.2	612.5
264539_at	228.6	169	163.2	205.9	178.4	199.6	197	153.3	188.1	200.6	211.1	295.9	243.1	215.9	230.4	206.5	184.1	286
264542_at	190.9	178.5	184.8	131.8	101.8	210.2	79.2	133.2	139.1	208.9	167.3	170	131.9	213.5	213.9	171	163.3	218.5
264545_at	28627	26175.6	29996.3	33125.9	37429.5	34368.8	26805.3	22298.6	24815.6	33286.2	30898.8	33657.8	25348.1	23474.3	26297.5	28598.9	27774	31410
264546_at	1134.3	1481.5	1436.3	1300.4	1456.5	1095.4	1382.1	1348.1	1117.3	1092.6	1108.8	992.8	905.8	916.1	857.8	1066.6	1015.6	923.8
264547_at	200.3	217.6	230	208.3	166.5	225.7	242.7	189.9	205.9	196.3	254.5	195.4	234.2	215.5	214.2	253.6	206	213.1
264548_at	964.7	766.2	752.2	676.9	598.9	749.3	882.9	832.3	785.9	981.2	800.3	1131.2	1278.6	1120.4	1331.2	742.9	943.5	889.1
264550_at	82.2	98.7	145.7	127.4	113.8	72.4	88.6	99.5	75.5	93.2	85.5	73	46.1	89.3	44.7	92.6	78.5	44.6
264553_s_at	236.3	224.7	197.3	328.7	296.6	279.7	255.1	238.5	264	345	446.6	431.8	276.1	243.8	198.7	351.1	270.7	319.2
264501_at	343.3	311.9	309.5	260.9	268.5	247.6	277.4	270.7	250.6	293.7	260.2	214.6	187.8	224.4	157.2	292.2	268.5	146.8
264504_at	1244.1	882.4	1028.7	768.8	978.7	850.8	1048.5	1098.1	1056	1003.9	1078	1175.8	1153	1388	1369.2	1111.4	1076.4	1148.2
264506_at	1510.8	641.3	708.7	1039.4	971.8	902.1	1036.1	928.7	1131.6	1061.3	1014.9	1278.5	1077.5	1352.9	1324.7	1379.3	1542	1317
264507_at	191	175.9	137.1	242.9	267.6	185.4	194.4	210.4	220.1	354.4	311.6	199.2	256.9	244.8	350.1	310.2	344.9	269
264508_at	605.8	538.2	591.1	519.3	574.1	550.9	576	592.1	552	510.5	476.5	473.2	647.9	622.4	792.6	609.8	745.5	696
264511_at	170.3	197	173.9	131.4	183.8	186.5	208.9	219	139.6	303.4	316.5	777.5	624.4	457.9	884.6	335.6	290.2	820.7
264515_at	865.2	625.6	686.9	768.8	666.5	473.9	854.2	739	727.2	877.3	793.5	861.3	1117.6	1178.3	1490.1	1004.8	972.9	1241.1
264516_at	395.7	328.6	371	222.4	232.7	249.6	362.1	416	294.9	304.3	254.3	344.1	597	613.4	545.5	353.9	387.7	412.8
264517_at	106	133.8	183.2	202.2	199.4	161.8	103.6	102.1	178.5	154.8	153.2	190.1	109.9	98.7	130	189	165.5	154
264521_at	397.6	349.9	339.1	242.3	319	262.5	321.2	322.5	373	286.3	300.1	332.9	196.9	259.6	349.7	305.8	353.1	288
264523_at	577.3	806.9	727.1	465.5	717.3	788.7	828.1	908.3	659.5	586.1	693	525.3	540	595.7	468.5	646.1	565.3	466.5
264525_at	374.6	383.6	286	365.5	406.8	387.7	240.4	268.1	330.5	317	261.7	336.7	289.7	258.8	347.9	250	272.5	349.3
264526_at	358.2	280.3	232.6	257.4	280.5	304.2	293.8	306.8	287.1	321.5	372.4	340.3	337.3	329.5	340.9	258.5	335.7	269.9
264529_at	299.9	433.5	504.7	376.4	416.5	295	402.5	359.2	370.6	326.1	270.6	169	304.6	262.8	266	431.7	399.5	292.7
264498_at	458.6	404	443.2	525.2	450.4	545.1	434.6	410.8	459	321	375.9	397.4	385.4	343	407.9	385.2	331.3	293.5
264471_at	105.6	171.7	222.1	86.8	105.5	55.6	189.4	210.8	191.6	96.6	77.7	75.5	82.4	109.3	106.8	101.8	53.6	62.6
264472_at	342.2	290.1	321	380.4	394.4	410.3	294.5	312.7	327.1	327.8	393.8	334.2	313.4	283.2	330.8	340.1	400.4	308
264474_s_at	52236.8	45389.6	55536.9	47807.5	66964.5	71599.9	42686.9	38179.5	44389.4	46785.6	53363.9	40298.6	55656.1	39765.6	41278.3	35380.7	43319.5	38678.4
264475_s_at	98.8	113.9	123.9	114	100.4	85.8	128.5	133.9	106.7	130.7	100.2	99.7	60	96.8	104.8	112.5	119.3	117.6
264476_at	549	295.2	325.8	349.5	385.7	274.3	436.1	436.8	301.6	379	419.1	333	508.4	469	392.7	450.9	451	429
264482_at	293.5	269.3	310.7	267.8	260.2	253.6	236.7	258.5	246.8	211.5	167	205.3	232.4	269.8	314.8	169.5	138.2	210.9
264484_at	578.2	538.8	476.3	644.6	564.6	712.8	529.6	637.1	579.7	543.9	640.3	638.6	638.6	672.2	772.1	538.8	542.1	660.6
264485_at	139.9	165.2	100.9	186.2	128.1	158.4	152.1	142.6	148.7	136.5	107.9	145.2	214.2	149.9	152.5	134.6	127	182.3
264486_at	973.5	689.5	922.4	662.7	662.1	521.6	754.7	839.3	831.1	908.8	846.7	723.2	869	953.3	1117.3	571.2	708.9	832.2
264487_at	251.4	105.8	131.9	183.8	262.3	216.1	249.3	193.4	157.8	204.6	165.1	243.9	202	263.8	222.2	214.5	242.5	252.5
264488_s_at	1430.3	1063.8	827.7	1352.1	1229	1184.6	1482.7	1224.2	1356.3	1772.9	1726.2	1537.7	972.4	1185.9	1179.1	2070.4	1386.3	1365.8
264490_at	508.5	617.8	556	593.3	554.6	662.4	574	549.5	560.9	465.6	465.9	641	520.7	465.2	459.6	466.5	550.3	479.9
264491_at	163.2	185	184.6	199.8	128.3	213.2	203.5	175.6	208.1	129	163.7	168.4	223.6	214	156.9	162.1	127.4	146.9
264493_at	181.1	183.6	183.6	184.5	181.5	139.1	129.4	121	183.5	174.8	167.5	151.1	155.9	148.2	165.9	118.7	148.1	141.1
264437_at	540	484.6	653.4	338.1	397.8	370.3	452.8	490.2	512.9	437.1	278.7	269.3	452.2	442.9	452.6	400.4	324.2	238.5
264438_at	5367.6	6870.5	6888.5	5853.5	5612.5	6990.7	7668.3	7248.4	8445.8	4210.8	4406.6	3910.2	5095.5	4555.4	3956.9	4863.7	4954.7	3643
264439_at	4530.7	4444.8	3938.7	3371.4	3359.4	3946	4497.7	4721	4824.7	3350.4	3425.5	4411.4	4389.4	4265	4069.4	3422.5	3432.4	3587.5
264440_at	708.9	630.8	715.9	1086.7	748.1	792.5	730.1	783	899.1	683	817.9	839.6	990.8	870	758.5	770.5	863.7	787.6
264441_at	912.2	1021.6	977.8	1117.6	1171.6	1493	1205.2	1021.1	973.8	933.1	941.2	995.5	876.8	927.9	726.8	1287	1099.3	999.3
264442_at	729.2	774.8	732.8	678.7	851.1	667.1	654.2	656.5	573.3	1010.2	982.3	887.2	719.7	734.9	635.7	685.3	740.8	711.5
264443_at	1010.3	1120.4	1211.2	1187.2	1382.4	1113.5	959.7	1000.7	884.1	1105	1182.4	1141.4	1103	951.6	1078.5	1082.7	1301.9	1272.5
264444_at	91.3	102.9	105.6	171.7	164.8	147.9	97.7	87.2	92.5	174.4	204.5	257.1	128.2	137.8	127	151.7	163.3	179.9
264445_at	726	565.6	366.6	484.6	383.9	417	587.2	558.6	461.4	543.3	613.1	618	791.4	792.5	801.3	676.3	595.2	738.2
264446_at	2171.1	2166.9	1962.4	2163.9	2049.3	2377.3	2477.2	2200.4	2412.7	2020.5	2140.3	2413.9	1945.9	2018.1	1744.3	2422.7	1946.1	2309.1
264447_at	217.6	260.3	285	283.9	328	343.6	264.9	223.2	258	263.2	294.1	426.4	299.4	275.9	321.6	375.5	444.6	417.1
264448_at	432.9	379.3	371.9	350.8	179.9	279.9	351.7	364.1	361	261.6	280.4	392.1	483.7	560.4	542.5	316.6	384.5	348.6
264449_at	375.3	649.5	590.1	492.3	517.4	448.1	543.3	539.5	713.6	413.3	366.2	244.4	355.8	381.2	438.8	445.1	468	387.3
264452_at	211.6	197.1	172.3	198.4	216.1	125.5	216.1	277.1	215	188.7	135	183.9	148.9	176.2	148	136.7	132.7	174.5
264456_at	420.2	322.9	308	331.6	382.4	262.8	367.6	395.2	382.2	368.1	313.7	387.2	299.5	350.2	369	336.1	363.6	348.6
264458_at	468.6	410.4	367	264.4	275.3	292.5	376.6	389.9	425.7	465.6	460.4	448.7	552.6	588.1	571	500.6	553.7	544.1
264460_at	418.8	329.8	378.6	288.3	273.4	140.5	461.5	397.5	473.5	277.2	182.9	262.6	383.2	497.4	504.4	211.7	225.3	190.9
264462_at	1747	1787.7	1721.9	2647.2	2691.2	2521.1	1804.7	1524.7	1811.4	2781.4	2698.3	2712.6	1833.6	1910.1	1891.7	2316.5	2589.6	2565.2
264463_at	493.1	508	483.3	379.3	404.6	392.5	389.4	421.6	476.3	491.4	491.5	506.3	487.8	527.4	542.2	451.7	400.5	364.5
264464_at	563.5	503.3	535.2	554.4	633.3	473.2	606.7	568.3	621	584.3	568.8	594.1	741.6	658.7	727	565.7	792.2	757
264465_at	265.8	337.6	355.2	361.4	246.5	269.8	364.3	290.2	341.7	275.6	326.4	311.3	326.4	217.3	252.2	285.3	197.3	295.3
264466_at	150.6	192.1	199.5	169.2	210.8	207.8	192.7	176.2	206.2	125	112.6	139.6	125.8	127.7	155.7	129.9	107.5	146.7
264467_at	182	122.7	130	120	179.3	130.4	115.1	138.8	139.1	88.7	151.5	317.9	222.1	206.4	244.4	261.2	234.7	299.9
264468_at	820.1	744.9	866.7	1082.6	1012.5	874.3	764.7	745.8	794.6	1000.5	908.1	983.9	763.3	771	743.2	930.2	811.6	838.5
264435_at	976.7	1115.7	978.3	1134.2	1030.8	1384.7	903.5	957.9	905.8	1161.5	1350.3	1100.8	1176.3	1082	1040.1	1110	995.2	1327.1
264436_at	664.3	1021.7	810.8	834.5	797.5	1158.8	866.9	888	1011.1	521.3	512.2	666.5	832.6	598	581.4	1113.5	726.2	1163.9
264406_at	651.4	470.8	510.1	437.2	344.9	398.9	526.3	472.1	503.2	411.1	448.4	411.9	512.1	528.4	606.4	393.7	385.2	380.2
264407_at	458.4	562.3	605.5	493	485.6	527.4	438.8	515.4	444.6	457.3	500.1	459.8	517.1	467.5	509.3	434.2	471.6	366.2
264408_at	125.7	139.7	148.2	113.3	177	233	131.1	122.1	197.6	147.1	193.7	155.6	190.6	120.8	102.6	162.5	171.9	86
264418_at	1181.5	1246.8	1446.6	1288.6	950	1273.7	1193.1	1280.5	1070.4	1271.6	1222.6	1216.1	875.6	1136.3	985.7	1212.4	871.7	886.1
264419_s_at	3674.6	4311	4206.9	4232.2	4568.7	3909.5	4303.9	4000.6	4930.3	3825.1	3777.4	3928	3048.2	3875.4	3388	4129.3	3659.4	3726.5
264421_at	17812.3	16041.9	18321.3	18561	16220.2	17774.2	17622.9	15949.9	18109.9	15852.3	13596.2	11172.9	15123.1	12168.6	10508.5	13688.1	12893.2	10348.3
264422_at	882.9	793	676.4	912	949.9	759.6	868.6	815.1	829.1	1067.3	1060.3	1123	1012.5	872	1127.9	942.7	887.3	1037
264423_at	202.1	177.1	143.2	119.8	80.4	130.3	140.2	173.8	141.3	151.4	112.8	175.4	225.1	219.5	191	84	124.2	157.5
264424_at	1317.7	1544.6	1361.3	1466.7	1288.1	1347.4	1733.1	1549.4	1638.1	1759.4	1619.1	1525.8	1527.2	1603	1462.4	1836.1	1574.5	1391.7
264427_at	1094.9	1106.3	1014.5	1303.1	1189.2	1233.4	1267.2	1191.6	1322.2	979.8	1145.7	1099.3	1283.9	1052.4	971.4	1365.1	1211.1	1207.8
264428_at	4869.2	3702.6	3164.6	3300.1	3229.3	2952	4476.8	4112.1	4455.2	4228.6	3737.7	3370.1	3548.1	3676.8	3864.9	3676.3	3052.1	3582.7
264429_at	155.5	180.9	133.4	177.9	135.5	176.9	179.7	190.5	189.8	161.2	248.3	209.8	135.1	181.7	185.6	225.6	267.3	224.7
264376_at	958.8	907.9	898	781.4	821.5	825.2	854.5	952.3	855.6	1066.9	937.9	1002.2	1039.2	1111	1169.3	932.2	1058.5	927.8
264377_at	554.4	711.3	756.6	696.5	609	712.9	603.8	596.3	676.2	677.5	518.8	669.2	406.9	416.5	395.8	460.7	604.5	510.3
264379_at	217	166	139.7	109.9	175.5	175.8	189.9	153.4	169.3	271.5	239	171.5	243.8	194.1	236.2	182.9	248.8	189.2
264380_at	443.4	319.1	278.5	221.4	251.5	239.5	282.8	302.9	270.3	395.3	307.9	376.2	392.9	342.9	434.3	313.3	304.5	313.6
264381_at	262.8	280.4	312.7	479.8	318.7	406.4	283.9	304.8	290.1	284.7	287.7	299.8	253.1	288.3	238.7	302.1	315.9	266.7
264382_at	2181.7	1386.5	1543.4	1598.2	1350.9	1269.1	1564.6	1656.5	1487	1645.6	1559.9	1789.2	1743.1	1891.4	1706.4	1597.7	1521.2	1408.6
264383_at	4853.9	5368.9	4814.2	5396.2	5565.7	5196.6	3994.1	3670.3	3973.1	5888.4	6223.6	5686	4070.8	4093.3	4393.4	5018.7	5224.1	4386.8
264384_at	361.4	372.4	515.9	388.7	330.9	294	321.4	417.6	383	236.9	290.1	213.8	333.5	341.3	437.2	265.4	255.9	314.6
264385_at	246.7	292.8	256	317.1	247.7	380.8	275	244.7	308.6	287.6	267.5	198.3	303.1	206.3	231.3	274.9	227.8	231.8
264386_at	1379.7	1424.2	1392.1	950	886.4	1032.6	1456.8	1337.7	1556.7	885.4	1027.4	774	1375.1	1112.2	944.6	1023.7	935.3	1016
264389_at	146.1	174.4	139.9	237.8	180.2	280.9	343.1	374.1	285.6	158.8	222.8	184.9	286.6	322.8	284.9	472.6	393.3	381.7
264392_at	111.5	125	115.9	89.3	128.5	107.1	95.7	117.2	89.7	104.3	88.4	111.8	114.7	145.8	121.2	108.5	101.2	126.7
264394_at	14618	16026.9	15345.3	17120.4	13906.3	19362.2	14558.1	13466.7	14888	11522.2	13932.9	12729	13307.6	11405.6	12955.8	11721.3	12607.9	13769.7
264396_at	642.6	661.1	664	639.5	613	694.4	616	622.4	605.6	731.2	837.5	994.6	886	851.6	793.9	804.1	896.5	1166.1
264397_at	728	740.5	794.3	941.4	884.2	881.9	907	928.7	899.8	816.7	775.9	738.2	569.4	638.9	736.2	786	788.9	768.1
264371_at	19956	21573.6	22377.8	25191.5	27299.8	20125.2	20844.3	19676.6	19390.2	16058.9	21842.1	17537.5	18923.5	17592.7	15871.1	20469.5	19411.7	18433.1
264372_at	8584.6	9192.5	9058.3	9487.5	9641.8	12324.1	9715.4	9564.3	9316.7	10229.4	10046.2	12423.6	13373.8	10787	10644.3	10579.7	11779.6	13826.3
264373_at	1704.1	1418.2	1379	1760.7	2022.5	1850.5	1553.8	1615.4	1545.6	2016	1990.3	2156.3	1755.4	1738.7	1705.2	1771.6	1825	2104.2
264342_at	56.6	91.9	93.9	141.8	88.5	113.9	73.1	107.6	52.8	139.7	136.5	87	65.8	60.9	127.4	56.6	96.2	126.8
264343_at	763.3	593.3	618.8	628.4	577.5	458	446.7	521.3	530.2	388.3	423.7	365.6	385.9	480.3	357.2	377.6	326.6	432.8
264344_at	10451.4	8296.8	8360.3	8022.6	8560.5	8878.4	8657.2	8565.1	8277.2	10327.3	9600.9	11560.5	10735.5	12041.2	11372.6	9506	9114.3	13591.6
264348_at	1944.9	1578.4	1640.9	1601.8	1433.1	1622.4	1953.8	2049.3	2145	1935.6	1703.2	2462.9	3384	3235.3	3967.1	1283.5	1657.4	2563.8
264349_at	1829.1	1355.9	1550	1703.8	2016.2	1708.5	1537.6	1600.2	1754	2152.4	1866.4	2080.7	1525.5	1626.2	1843.6	1820.3	2111.3	2108.5
264350_at	766.9	1131.4	1009.4	1467.7	971.3	1123.3	1007.2	991.9	996.5	682.4	730.4	625.1	802	596.6	570.6	720.9	711.3	635.1
264351_at	403.3	241.8	197	290	181.4	246.1	267.6	267.8	269.5	280.6	250.4	286.1	349.7	385	431.2	243.3	222.8	285.6
264353_at	136.3	163.5	207.6	171.3	230.3	259.1	186.9	204.3	231.9	297.8	235.1	264.4	207.3	207.9	199.9	277.3	266.8	247.1
264355_at	588	304.8	282.4	409.8	388.9	546.5	378.5	305	395.6	659.6	694.9	846.2	556.9	485.5	595.6	594.5	515.7	673.8
264356_at	70.1	102.8	125.3	116.6	91.7	130	85	102.9	156.9	117.8	116.9	144.5	97.7	120.1	104	91.3	114.5	97.1
264357_at	222.3	235.9	332.9	291.7	328.4	283.1	273.7	286.3	303.6	204.6	255.7	141.5	193.4	141.4	156.5	268.3	261	188.1
264360_at	1869	1841.8	1743	1981.4	1714.4	1566.7	1550.3	1723.6	1883.4	1723	1631.4	1928.1	2081	2048.2	2161	1657.6	1450.6	1627.8
264362_at	484.8	183.4	212.7	245.1	238.1	291.6	249.2	241.9	254.3	435.3	501.2	481.4	418.8	430.1	522.3	353.7	404.4	426.8
264364_at	946.9	1258.5	1280.9	1699.3	1830	1598.4	1345.4	1423.1	1486.1	1663.6	1528.3	1669.3	1049.4	1167.2	1219.5	1706.1	1662.3	1403.1
264365_s_at	1400.2	1028.4	1097.5	998	1150.9	1286.4	1452.5	1234.7	1364.8	962.3	839.8	731.3	922.6	1277.3	1119.8	991.6	1448.4	1272.2
264366_at	337.2	413	356.7	475.5	441.2	392.7	379.8	405.4	342.8	430.5	442	578.5	402.8	398.3	413.2	369.2	465.1	420.9
264367_at	762.8	687.1	591.5	542.2	571.9	588.1	640.2	598.3	712.4	593.5	621.3	603.5	585.3	683.7	796	549.5	657.2	668.8
264368_at	420.3	414.2	431.4	478.5	590.7	564.1	346.8	319.3	561.3	593	438.3	563.3	329.4	392.6	383.1	583.1	514.1	506.3
264335_s_at	1973.2	1864.9	2165.7	1205.9	828.5	884.3	1362.9	1586.6	1549.8	1060.9	1356.3	1157.4	1627.8	1983.5	2165.8	1003.5	858.2	860
264336_at	83	81.8	120.4	127.1	127.9	149.1	111.2	121.9	146.6	169.6	166.8	108.2	76.6	117.9	154	171.1	156.4	162.2
264337_at	344.1	395.4	395.6	426	448.2	378.8	428.7	411.1	476	344.8	314.7	278	317.3	303.3	280.2	404.3	381.9	225.4
264338_at	153.4	132.4	84.2	82.5	136.5	104.1	113	140.9	78.7	149.6	94.4	85.6	133.4	190.7	128.2	141.8	168.4	154.3
264339_at	454.4	332.4	333.3	416.4	343.3	288.6	295.3	318	296.4	456.7	320.4	357.1	446.6	421.7	394.2	564.8	377.3	567.9
264340_at	511.2	530.8	518	671	670.9	652.3	604	673	761.8	543.6	469	356.8	590.5	512.5	489.7	556.7	570.1	460.2
264341_at	80.4	79.5	79.7	85.7	113.4	118.7	72.7	85.9	59.8	88.7	85.3	138.7	125.1	133.8	157.6	63.2	144.5	134.4
264313_at	4054.2	4276.5	4472.3	4453.1	4719	5747.8	3705	3764.1	4177.8	4967.3	4498.5	4990.6	3403.9	3637.1	3339.4	3808.7	3998.7	4161.5
264314_at	419.9	397.1	357.3	175.7	226.3	271	226.8	272.5	318.2	320.7	382.2	326.8	488.6	484.5	508.1	257.9	292.6	324
264315_at	4208.6	4527.2	4215.9	4131.8	4175	4259	5276.3	5062.2	5469.7	3524.6	3388.6	3021	4098.4	3923.3	3311	3565.7	3758.7	2806.3
264316_at	1712.2	1594.2	1610.6	1571.6	1489.1	1645.1	1482.7	1926	1725.1	1633.7	1821	1717.9	1468.2	1907.2	1790.4	1738.7	1575.9	1823.5
264317_at	2790.1	3152.6	3530.7	3451	3042.4	3285.7	3262.5	2707.2	3066.3	3030.2	2298.5	2295.1	2346.3	2368.3	1903.7	2642.8	2197.2	2192.2
264319_at	292.7	337.3	337.3	256.7	209.2	221.4	250.4	292.9	301.9	161.9	186.5	181.7	245.1	220.1	214.8	115.7	165.4	142.3
264321_at	288.4	229	266.1	263.6	238.1	185	280.9	265.2	185.3	164.8	307.6	347.9	311.5	278.6	315.6	311	283.4	304.3
264322_at	733.5	842.2	833.8	933.1	989.8	935.9	823.8	829.3	909.7	846.5	791.8	829.6	653.2	658.4	668.3	735.2	750.3	855.6
264324_at	55.6	131.5	129.9	117.8	96.7	126	101.2	118.4	98.2	87.8	131.7	50.3	87.4	92.3	95.3	101.2	80.9	77.4
264326_at	208.1	152.1	176.3	231.5	180.7	249.2	186.6	177	180.2	245.7	242.5	240.5	192.2	213	197.5	221.1	207.3	248.7
264327_at	2011	2645.1	2692.2	2785.6	2692.6	3156.4	3220.4	3057	2791.2	2389.5	2211.3	2113.3	2328.5	1889.7	1935.4	2175.3	2198.9	1994.3
264329_at	1093.9	956.7	1043.2	765.8	555.9	831.1	903.6	843.2	1008.6	693.2	853.9	891.8	1103.2	1096.5	968.1	765.2	787.5	1216.5
264330_at	267.9	335.7	365.6	235.6	252.4	197.7	298.5	374	348.1	284.3	255	268.7	320.1	318.1	361.3	314.4	252	254.4
264331_at	141.1	170.9	135.7	135.1	174.3	115.4	158.8	202	159.4	190.2	174.8	110.6	130.2	110.3	158.5	179.5	158.6	98.2
264307_at	551.9	660	696.9	868.6	547.2	652.7	655.9	621.6	696.4	522	479.8	532	623.2	544	591.1	468.1	506.5	484.8
264308_at	264.5	340.9	318.1	296.5	332.5	410.3	290.2	295.6	325.3	262.4	303.2	244.5	229.6	299	219.7	297.7	283.2	250.4
264309_at	1779.3	1410.4	1507.3	1440	1274.8	1401.3	1541.9	1515.9	1662.9	1273.6	1297.9	1084.9	1466.5	1606.3	1696.9	1121.4	1219.6	1292.5
264310_at	181.2	181.7	162.8	161.5	95.2	106.8	157.7	202.7	176.4	91.3	113.9	98.3	190.4	127.3	219.9	49.2	77.1	72.9
264283_at	252.2	248.8	250.3	261.3	289.3	172.3	200.6	183	250.5	218.8	143.7	193.6	342.4	267.5	213.4	136.5	178.8	130.8
264285_at	730.7	508	605.6	738.5	852.6	726.2	535.1	619.6	606.6	1091.1	887.1	1164.4	915.4	842.9	999.6	977.5	1043.6	880.5
264286_at	758.3	786	781.6	706.3	902.8	466.5	1057.7	1090.4	1068.3	722.9	610.1	472.4	539	492.4	660	807.1	627.5	519.4
264289_at	390.2	333.4	379.9	479.5	286.3	468	457.9	539.5	513.3	361.3	316.9	432.5	466.4	563.2	437.1	495.1	469.1	481.1
264290_at	196	195.9	297.9	207.3	185.2	85	170.1	198.4	257.6	206.3	169.3	204.2	288.4	271.5	251.4	148.5	138.8	174.9
264291_at	234.5	213.3	228.2	281	190.1	288.3	222.4	225	235.3	263.4	218.3	354.6	284	235.2	314.8	282.5	302.2	292.6
264292_at	249.2	281.5	116.4	215.4	226.8	174.9	149.2	176.6	174.6	194.9	287.3	202	220.7	227.4	238.5	227.3	230.6	277
264293_at	218	219.2	259.7	191.7	196.4	210.6	180.1	225.6	233.6	206.9	106.9	160.3	126.1	133.7	123.1	186.1	102.8	132.8
264298_at	203.4	217.3	300.9	381.3	279.8	312.6	188.2	205.1	199.7	328.5	234.8	344.1	217.5	236.3	230.3	233.3	185.8	255.4
264299_s_at	2536.6	1938.6	1712.9	1831.3	1792.4	2181.1	3200.7	3352.7	3295.4	1778.8	1464.6	1311.8	2906.2	2518.4	2129.2	2749.2	2391.9	2036.9
264300_at	749.4	806	830.2	827.9	809	832.3	845.3	755.6	836.4	1014.1	1093.5	1340.1	1226.9	1164.7	1398.8	1032	1194.3	1564.6
264302_at	6027.6	6676.2	6656	6328.8	6336.5	6886.2	6750.8	6632.2	6698.8	5833.6	6490.9	5792.2	5761.6	7088.6	5973.9	6440.8	6792.2	6843.9
264303_s_at	2929.6	3131.8	2891.2	2957.5	3051.9	3889.2	3011.7	2826.7	3070.3	4556.9	3928.2	5440.5	3665.2	3206.5	3792.3	3212.1	4184.3	5234.4
264304_at	187	187.8	139.7	296.8	177.4	165.6	194.7	197.8	251.9	316.9	191.6	299.3	306.6	272.4	296.5	311.6	284.5	317.5
264306_at	909.6	694.9	698	980.4	868.6	888	591.2	616.1	619.5	1212.6	1116.8	1258.1	947.2	940.5	995.9	999.7	997.8	1482.4
264279_s_at	3440.7	2349.7	2240.3	2507.5	2589.4	2756.8	3168.6	2708.2	2692.9	2533.2	2375.9	2163.4	3022	2737.1	2612.8	3296.3	2908.8	2796
264248_at	188.6	192.2	183.8	196.8	227.8	207.5	166.4	181.6	161.1	178	192.6	163.1	200.8	197.3	241.2	189.3	180.2	187.1
264249_at	1382.1	1100.4	844.6	1276.5	1035.7	1010.3	1212.8	1006.4	1179.7	1062.7	1162.2	1104.5	1150.3	1205.2	1009.2	1086.5	1136.1	959.5
264250_at	2011.4	2856	2829.7	3164.1	3057.7	2800.4	2858.8	2712.7	2895.9	2663.4	3409.9	3494.6	4264.7	4390.4	4479	3224.8	3725.4	3296.8
264254_at	831.1	1031.3	1067.4	988.8	1141.2	970.9	1032.7	1027	875.9	894.1	944.9	808.7	982.7	812.1	840.9	896.8	1036.7	931.3
264255_at	363.1	321.2	330.6	372.8	424.1	420.5	350.2	349.6	384.1	615	459	665.6	390.1	405.8	445.5	494.4	639.9	721.1
264256_at	800	835.3	525.1	790.5	988.8	814.1	1009.1	673.8	1148.7	433.3	660.8	607.9	915.1	635.7	796.7	692.5	711.9	600.5
264257_at	203.7	198.2	206.1	290.7	271.4	146	179.8	228.7	139.8	249	218.3	233.6	216.2	210	192.8	251.7	163.4	203.1
264259_at	75.3	87.5	65.5	107.4	163.7	172.3	83.1	78.1	83.5	122.1	141.4	107	78.2	79.3	77.7	165.2	71.8	73.8
264260_at	4691	3433	3541.6	3572.6	3664.2	3866.3	3968	3676.6	3795.3	3622.3	3252.6	3743.2	4296.8	4115.2	3739.1	3512.4	3313.1	3725.6
264261_at	502.2	608	457.6	332.1	359.8	332.2	379.8	358.5	305.2	499	565	738.6	642.4	372.8	678.9	344.7	304.4	488.9
264262_at	2919.1	3185	3394.2	3443.2	2598.5	3119.4	2713.2	2847.6	2949.5	2728.4	2810.3	2619.6	1843.9	2254	1680.6	2648.7	2505.6	2183
264264_at	313.1	323.2	350.6	316.2	442.5	379.5	290	312.4	302.3	327.2	319	338.6	306.9	305.3	269.1	364.4	372.1	327.2
264265_at	291.6	296	316.5	423.5	307.9	400.5	225.5	300.9	322.9	345.7	332.7	501.4	316.8	249.4	299.6	275.6	285.8	323.3
264266_at	274.6	283.5	306.3	287.5	203.7	249.3	322.7	312.6	279.9	293.2	144.5	173.1	171.6	155.6	196.9	260.9	289.4	175.6
264244_at	576.6	317.1	423.1	427.5	493.3	505.1	432	416.7	460.3	552.5	507.7	666.4	552.1	494.2	771.4	578.4	498.5	762.3
264246_at	283.7	231.2	251.2	228.7	274.7	209.8	239	255.8	251.8	298	314.3	329.4	374.2	405.2	399.5	376.5	417.9	435.2
264247_at	417.8	593.5	521.7	348.7	334.6	401.2	480.6	450.6	457.9	482.2	406	466.6	479.9	565.5	474	461.6	447	319.8
264218_at	211.9	190.7	264.7	261.6	266.7	155.1	175	204.1	192.8	233.9	256.3	251.6	194.7	213.2	243.5	238	264.3	198.4
264135_at	123.8	129	148.2	122.3	145.1	91.1	129.7	147.6	106.5	146.7	131	148.1	140.1	120.2	126	76	120.3	95.9
264140_at	924.2	1064.6	1060.6	800.7	912.5	979.8	1018.6	1237.9	1067.4	910.8	1132.5	1286	1117.8	895.8	1032.5	1266.4	1106.6	1024
264141_at	658.7	588.5	569.3	307.4	353.3	476	563	658.8	643.8	433.9	457.2	476.9	506.6	605.1	734.2	426.8	346.1	378.8
264142_at	96.8	120.2	145	170.2	165.5	152.9	112.1	131.7	156	93.9	94.5	74.7	123.4	83.8	80.1	97.2	73.6	81.8
264118_at	269.5	402.2	380.2	304.6	302.8	301.2	394.4	450.9	401	187	286.5	193.8	206.3	219.2	152.1	271.7	243.3	200.4
264120_at	1182.7	1106.2	1085.5	1220.9	1187.9	1111.5	1281.9	1367.7	1598.4	1457.9	1298.2	1634.8	1303.7	1552.5	1655.5	1222.6	1581.3	1709.2
264091_at	298.5	218.8	311	404.4	434.4	346.8	294.6	277	264.5	541.5	557.5	634.8	372	334.1	493	387.1	343	529.4
264092_at	28455.2	26128.1	29377.6	32036.3	36280.2	30731.6	24555.4	22030.7	24339.2	30158.9	28100.1	33290	29570.5	22764.2	27345.2	24662.1	27583	33172.4
263942_at	822.4	855.2	813.8	896.5	698.1	928.3	998.1	1125.3	1102	785.5	860.3	876.9	1081.7	1150.3	1299.1	760.9	830.8	1173.6
263943_at	914.4	1075.8	1030.8	737.4	538.1	650.3	819.8	874.7	876	685.1	716.7	668.5	713.8	899.5	691.1	622.4	600.8	542.1
263946_at	529.6	628.3	569.2	484	519.4	554.9	730.8	601.4	599	528	571.4	389	438.8	517.1	369	478.7	436.2	388.2
263949_at	1397.1	1306.4	1269.6	1475.5	1806.4	1621.2	1275.6	1239	898	1670	1621.2	1985.7	1623.5	1619.5	1825.9	1910.9	2050.7	2226.6
263951_at	845	1069.3	821.6	789.5	875.5	693.1	964.8	962.2	903.8	1060.5	1115.3	1056.5	1051.4	1205.4	1180.6	872.5	788.2	854.3
263952_s_at	2673.7	2773	2414.3	2317	2729.6	2649.9	2613.5	2571.8	2331.1	2842.3	3212.5	3305.5	2973.5	2870	2862.3	2731.7	2695.6	2972.5
263954_at	1744.6	1812.2	1772.3	1675.1	1976.3	1579	1422.9	1510.9	1612.9	1831.3	1978.1	2148.9	1730.6	1906.1	1766.7	1686.2	1805.9	1841.8
263955_at	102.2	135.4	188.7	133.8	139.9	128.5	109.6	104.5	131	117.6	104.9	93	137.4	117.3	112	124	118.3	112
263956_at	971.4	750.1	477.2	410	504.4	489.3	940.4	829	873.5	899	947.2	1307.3	1384.1	1445	1569.9	772.7	972.3	962.1
263957_at	554.6	442.5	460.1	325.7	275.4	390	577.1	595.4	525.2	252.5	370.4	344.4	593.2	527.7	724.8	418.4	439.3	580.5
263958_at	360.3	418.5	378.7	507	466.1	440.8	366	433	389	500.2	495.2	560	377.3	489.9	466.7	473	352.3	478.4
264219_at	713.1	609.3	684.8	467.2	648.6	561.4	617.4	667.3	627.1	654.5	794	657.8	681.9	965.4	919.6	790.8	935.3	764.1
264221_s_at	379.9	376.5	382	395.1	345	372.3	321.9	366.2	309.2	402.8	426.3	408.1	372	391.8	482.9	419.6	422.9	432.6
264222_at	357.5	387.8	540.8	715.9	649.5	671.3	297.1	352.4	371.6	540.4	387.7	377.6	293.2	276.6	252.4	422.4	395.8	356
264223_s_at	77.5	71.2	31	56.9	106.1	75	76.1	58.5	77.8	76.5	132.7	145.2	87.5	111.6	154.8	83.1	150.1	137.7
264224_at	239.6	333.1	289.5	357.1	333.3	213	259.5	212.9	213	323.6	363.6	411.1	251.8	262.5	306.7	293.5	413.7	307.8
264228_at	173.7	156	163.6	174.9	190.8	221.9	179.6	160.4	201.4	204.4	219.2	159.8	183.7	195.7	176.1	215.8	157.2	129.2
264229_at	665.3	704.5	462.6	754.9	958.9	428.8	718.3	733.1	622.4	891.7	739	567.3	577.9	596.6	740.6	684.3	795.1	677.2
264232_at	126.2	115.9	155.9	161.6	148.2	134.2	163.5	132.3	143.8	204.8	186.9	172.8	243.3	229	228.3	161	139.2	157.7
264233_at	12779.9	13019.1	15309.6	16081.5	16870.7	16608.7	13404.1	11710.8	15061.5	12635.4	11470.5	10628.8	10122.1	9044.9	8114.2	13090.2	11834.8	10376.5
264236_at	128.8	118.2	126.3	94.4	135.2	173.3	141.2	131.3	163.4	135.8	219.8	158.6	157.7	145.1	163	122.9	129.1	156.6
264239_at	525.6	524.6	625.7	637.8	851.5	549.3	528.5	582.7	552.3	575.1	599.7	513	463.6	395.2	354.9	598.5	679.4	496
264240_at	924.2	1101.2	935.7	833.4	844.2	862.1	1057.7	880.1	1000.2	970.7	982.6	811.6	1023.4	997.8	1065.3	847.2	821	928.8
264243_at	195.4	212.6	170.8	253.4	212.8	242	214.3	166.2	185.5	273.7	243.9	269.5	239	199.4	226.6	255	274.1	168.2
264185_at	15355	16429.2	16379.8	16189	17054	19153	14626.4	13506.3	13261	15729.4	17439.9	18651	16260.5	14170.2	15075.4	13719.9	16423.1	16700.8
264186_at	174	217.6	180.5	152.4	191.2	176	167.9	167.6	183.8	200.1	154.9	155.1	151.7	215.1	198.1	217.4	211.3	138.9
264188_at	1464.2	1729.3	1699.3	2094	1725.9	1725.7	1840.7	1638.4	1748.4	1561.2	1580.4	1522.9	1406.4	1053.5	1131.4	1778.8	1635.3	1213
264189_s_at	3764.6	3862.3	3883.7	4117.9	4662	4742	4328.4	3889.8	3757.1	4780.6	4257.8	4790.1	4454.5	3545.1	4597.8	4747.5	4759	5103.7
264190_at	443.4	486.1	495.8	342.1	510.6	390.1	544.6	557.3	476.2	451.7	509.6	507.5	719.2	681.6	623.4	459.8	483.5	562.2
264191_at	212.1	151.6	137	199.7	170.9	227	177.4	212.9	257.7	192.1	284.2	218.7	227.4	199.2	213.1	189	189.3	206.6
264192_at	378.8	279	266.3	333.4	230.5	199.9	279.2	348.4	292	259.9	238	253.2	354.1	294.3	329.4	224.8	282.6	304.9
264193_at	979.2	911.2	858.8	889.6	923.8	913.4	867.1	806.9	904.9	826.2	831.1	1171.7	871.4	897.4	970.6	861.1	870.9	850.1
264195_at	774.4	679.5	744	716.1	636.2	676.8	1016.1	1028	1072.3	661.7	623.3	933.8	603.3	653.8	808.5	735.8	635.7	794.7
264197_at	366.8	328.8	343.8	328.6	329.1	265.1	300.3	321.5	297.3	262.8	320.3	258.6	423.2	408.2	459.4	261.7	363.9	273.8
264198_at	263	273.9	328.8	396	399.6	387.8	278	326	230.6	278.2	337.2	190.4	293.9	289.9	229.5	338.9	387.1	327.5
264199_at	1527	1820.7	1713.1	1823	1954	2006.3	1368.1	1666.5	1402.4	1673	1565.9	1576.2	1381.5	1303.5	1340.8	1707.9	1736.5	1442
264200_at	300.9	229.3	177.7	216.7	220.8	161.7	270.9	257.6	256.3	259	214.9	166.4	218.4	229.8	219.2	159.5	165.1	177
264201_at	857.2	1032.7	757.3	649.4	748.6	900	770.7	809.5	720.3	903.5	1012.8	901.5	901.1	869.4	970.9	770.1	634.6	666.2
264203_at	6110.1	8217.1	8674.4	7805.3	9085.9	6129.3	8886.5	7974.8	7559.8	6629.4	5862.2	4798.9	5799.1	4688.9	4631.9	6262	5555.1	4260.2
264204_at	3129	2973.8	2761.1	3435.2	2371.2	2367.4	2464.9	2119.2	2629.3	2217.2	3033.8	2605.2	3207.8	2961.4	3275.5	2102.6	2471.2	2289.3
264205_at	347.7	285.8	262.8	267.5	337.3	410.1	298.7	290.8	254.5	418.3	368.1	432.6	401.3	355.4	454.1	345.6	497.4	562.1
264206_at	300.5	282.2	316.8	419.3	500.7	462.6	325.5	312.8	401.5	404.7	388.2	282.8	307.2	276	274	365.1	469.5	341.1
264207_at	2164	1821	1682.7	1643.5	1819.2	1232.6	1666.8	1779.8	1826.5	2041.7	1895.1	1858.4	2135.2	1956.9	2132.7	1657.1	1857.4	1265.5
264209_at	188.1	278.8	341	383	341.5	395.3	217.6	195.5	230.9	320.8	354.1	480.9	279.5	318.5	312.7	320.6	305.1	450.1
264210_at	159.5	189.1	153	142.3	214.1	146.6	144.3	148.9	190.2	185.9	190.3	186.4	176.4	206.3	197.5	170.9	216.7	228.9
264211_at	1977.4	1778.7	2031.6	1228.2	1117.6	995.2	1848	1811	1799.3	1450.2	1524.9	1542.9	2286.7	2707.2	2188.2	1141.2	1240.9	1318.9
264212_at	229.8	221.6	199.1	219.8	248	221.6	208	205.7	228.8	264.6	223.8	230.3	227.6	172.9	182.5	235.3	213.2	249.5
264183_at	185.8	186.3	175	143.1	116.2	100.4	161.1	134	178.2	130.9	162.9	191.2	159.5	209.6	171.8	101.5	95.5	158.7
264154_at	349.4	405.9	341.7	340.7	383.9	369.9	327.2	406.2	348.2	414.4	432.1	434.7	432	473.1	450.9	372.6	391.3	422.8
264156_at	471.7	324.7	340.5	205.1	307.2	316	298.6	330.6	400.6	314	276.9	288.5	362.4	415.8	453.2	254.9	314.4	359.1
264158_at	5319.4	5861.4	5998.6	5541.1	5800.3	4403.7	4802.3	4586.2	4518.2	5262.8	5161.2	5155.4	5145.6	4572.3	5050.5	4614.4	4719.6	4370.1
264159_at	826.4	933.4	786.9	690.4	621.7	730.3	834.3	887.9	811.2	765.3	841.7	1048.2	951.7	859	939.6	873.3	647	900.9
264160_at	415.1	290.7	224.6	445.3	330.5	303.9	332.6	455.3	343.2	449.4	562.8	391	737	651	777.8	480	660.2	702.2
264161_at	459.3	514.1	627.8	663.4	709	640.5	523.6	553.7	539	731.3	780.4	700.6	751.3	604.6	574	754.7	822.7	607.3
264162_at	5520.9	6110.4	6368.2	5727.5	6041	4939.2	6139	6011	5342.8	5713.8	4849.3	3812.1	5187.4	4424.8	4248.8	4702.7	5481.8	3895.7
264164_at	748	896.7	666.7	766.3	774.4	743.2	771.8	722.6	804.6	628.9	704.1	757	655	698.9	605.2	706.7	733	715.4
264165_at	942.5	744.8	966.7	744.3	937.6	929.9	680.1	816.3	772.9	855.9	804.6	862	1027.4	888.6	765.5	767.1	790.6	888.8
264166_at	399.9	389.9	305.6	810	467.8	519.9	504.7	547.5	451.7	644.8	658.6	726.3	462.4	455.1	448.7	800.1	809	705.8
264168_at	809.7	1109.3	1061.3	735	629.2	584.6	971.1	963.9	1187.2	727.8	706	807.8	994.5	1073.7	1008.1	637.1	625.9	579.8
264169_at	311.3	215.4	288.8	283.6	257.2	237.7	247.7	190.3	276.9	282.8	175.3	215.6	273.6	259.1	311.2	191.7	285.3	182.2
264170_at	393.7	312.2	347	382.2	423.9	386.6	313.7	232.8	339.7	247.3	401.1	388.9	492.8	326	364.8	467.8	408	515.2
264171_at	321.3	242.6	224.5	333	341.7	317.8	282.3	226.7	274.5	362.1	290	272.9	295	307.7	325.1	356.1	293.4	309.1
264172_at	736.2	708.1	487.4	722.5	802.6	608.9	720.8	602.9	684.5	897.4	895	1154	659.8	935.5	1104.6	813.5	787	957
264173_at	674	843.6	775.3	949.3	1195.3	991.1	898.6	763	871.5	1195.1	1246.6	939.2	844.6	848.1	908.9	1215.4	1038.8	1223.4
264176_at	165.6	247.3	245.8	132.7	200.9	214.2	186.4	251	203	122	141.2	164.8	138.7	194.1	167.9	152.3	186.5	170.9
264177_at	3288.7	3978.3	4147.6	3839.8	4011.7	3304.3	3669.2	3944.5	3861.4	3041	3042.8	2273.7	2747.3	2493.9	2307.6	3105.8	2596.6	2301
264178_at	695.8	518.6	600.5	684.8	643.6	596.1	585.9	467.2	563	559.7	622.1	823.9	674.7	577.2	724.1	574.5	476.8	630.5
264179_at	327.7	304	383	392.4	298	530.2	343.8	256.5	369	208.1	287.9	255	297.1	191.7	203.5	377.8	299	189.6
264146_at	2922.6	2722.9	2189.8	2774.3	2509.3	3720.9	2166	2445.9	1857	2549.6	3579.7	2943.9	2794.6	2362.5	2276.4	2559.6	2711.6	2702.5
264147_at	1517.8	1734.2	1374.7	825.7	1122.1	1098.7	1079.1	1427.5	1036.4	1179.9	1613.6	906.5	1558.3	1649.6	1012.4	962.7	1151.8	904.9
264150_at	365.1	355.5	280	409	371	530.8	357.8	395.2	380.5	325.6	451	483.2	445.3	356.9	381.2	456.9	386.4	489.1
264152_at	3266.5	3173.4	2924.8	4276.5	4209.5	4436.2	3467	3237.6	3542.6	3815.3	3467.6	3673.6	3132	3147.6	2829	3726.9	3878.1	3829.8
264121_at	1648.4	2989.5	2930.6	2898.1	3097.6	2095.3	2946.7	2973.5	2820.2	1723.9	2276.3	1317.1	1653.9	1471.4	1321.7	2213.1	1664.4	1094.6
264122_at	624.3	607.1	597.9	724.5	757.7	522.3	565.2	634.7	619	654.4	627.6	835.5	546.8	583.3	639.6	708.8	770.3	792.8
264123_at	1005.4	798.6	734.3	906.2	892	872.4	735.3	817.1	713.8	1146.6	1161.4	1387	998.4	1043.6	1028.1	1022.5	1045.3	1337.6
264125_at	209	242	152.6	186.3	150.7	153.9	183.7	174.5	155.4	145.1	171.9	163.9	117.9	182.3	209.8	195.7	151	108.3
264126_at	457.5	400.2	518	414.5	399.4	304.9	373	389	403.8	394.3	387.5	409.6	458.5	350.3	456.4	344.2	316.5	316
264128_at	123.1	164.7	140	189.9	133.5	109.4	124.7	134.6	127.8	131.3	166.9	134	121.5	150.6	120.2	165.9	113.8	100.3
264130_at	156.4	193.3	179.6	190.4	214.3	217.8	189	169.6	185.7	177.7	165.8	191.4	191.6	205.3	174.6	193.8	171.2	214.4
264131_at	336.1	412.2	496.7	352.6	288	233.2	436.6	503.1	460.7	242.4	254.7	214.7	317.9	261.4	254	260.3	251.6	199.1
264133_at	244	284.6	332.8	354.4	341.4	268.5	280.1	335.3	256.8	257.4	258.3	204.4	161.6	218.3	187.4	244.8	212.3	199
264094_at	163.3	145.6	117.7	182.9	146.4	171.7	137.6	136.3	144.4	154.4	157.4	286.6	174	134.2	137.4	167.9	191.7	151.2
264095_at	1929.2	2385.7	2348.1	2050.6	2546.4	2568	2400.9	2343	2065.4	2080.8	2263.5	2464.3	1915.7	2298.9	2031.5	2405.5	2428.2	2623.4
264096_at	1397.7	1623.3	1505.5	1222.1	1455	1228.8	1152.9	1340	1181.1	1289.9	1220.9	1484.5	1371	1629	1570.1	953.1	1082.5	1131.7
264097_s_at	3324.3	2949.5	3136.4	2975.1	3166.7	2925.3	2892.7	2980.2	2922	3124.5	3185.3	2796.2	2778	2680.5	2547.9	2990.8	2952.8	2690.9
264098_at	402	447.5	484.9	646.3	578.7	778.5	526.5	556.7	491.1	384.4	512	453.6	453	437.7	386.9	576.1	654.4	462.3
264099_at	658.9	600.1	587.5	531.7	632.1	749.4	631.1	619.6	603.1	537.6	664	426.6	587	709.4	602.7	659.1	741.6	633.1
264100_at	197.1	153.6	155.3	254.6	233	156.7	136.8	113.7	129.7	364	227.8	289.9	258.5	218	308.4	200.9	199.9	298.8
264101_at	435.4	465.7	404.5	341	376.7	337.6	443.4	437.7	473.7	411.1	418.8	281.5	403.7	432.8	448.8	303.3	333.4	368.6
264107_s_at	963.8	394.9	507.4	669.3	447.2	494.5	597.2	647.1	613.1	970.3	806.2	914.8	869.1	839.1	990.3	941	636.4	952.7
264111_at	247.3	249	280.3	263.3	352.1	238.9	312.7	318.8	326	240.9	338.1	275.4	207.4	282	354.8	214.9	335.7	320.6
264113_at	186.2	161.6	159	166.8	197.2	192.4	172.7	127.5	141.2	170.3	192.4	242.3	126.8	181	192.9	187.1	188.2	207.8
264114_at	199.6	239.4	293.7	263.1	262.5	210	188.6	236.7	236	212.3	276.1	181.6	161.3	141.2	147.7	179.4	203.7	169.8
264116_at	147.5	226.4	252.3	174.7	163.5	160.5	172.4	183.3	179.5	170.7	171.8	189.4	145.7	100.2	184.1	122.5	126.5	132.8
264084_at	322.4	378.7	406.1	449.2	443.5	296.4	419.1	398.4	422.7	441.8	396	399.8	327.1	357.8	335.1	415.1	337.7	355.9
264086_at	246.1	259.6	241.9	334.7	369	271.4	216.8	250.3	216.9	374.7	297	229.9	208.3	148.9	150.7	311.6	359.8	226.8
264089_at	1426.5	1203.6	1054.7	1354.1	1664.3	1351.1	1487	1394.8	1539.7	2083.1	1718.1	1478.5	1508.1	1530.6	1594.4	1984.9	2358.4	1668
264059_at	93.5	101	119.4	105.4	126	159	97.9	83.7	109.6	112.1	155.9	129.3	57.3	134.1	112.8	136	111.2	169.8
264060_at	187.6	209.3	185.6	238.5	152.3	175.9	211.9	237.8	148	210.6	209	176	149.4	217.2	198.7	223.6	167.8	261.9
264061_at	447.4	635	605.9	665	639.2	652	557.9	544.7	540.3	680.1	573.1	619.3	402.4	323.6	422	596.7	580.7	481.3
264063_at	461.1	369	326.7	278.9	305.9	265.2	355.4	373	394.1	292.3	382.7	451.4	392.2	508.7	434.2	375.5	352.4	389.8
264064_at	308.8	313.3	275.2	210.7	248.8	180	287.4	270.4	272.1	235.4	216.8	147.4	317.4	261.4	341.3	231	184.1	165.8
264069_at	9248.2	12680.8	13318.4	13963.5	14093.1	13960.2	12889.5	11830.2	12168.5	6716.1	7686.8	4867.8	7823.7	6843.1	5431.9	8812.3	8915.2	5950
264070_at	566.7	579.7	606.3	541.8	599.8	789.5	697	703.2	668.4	879.4	653.6	736.4	1241.7	812.2	791.7	637.6	744.2	847.9
264071_at	430.3	386.4	355.8	249.4	370.7	311.5	355.4	365.7	319.5	661.1	706.6	773	459.9	585.2	552.4	447.5	377.3	496.1
264076_at	413	528.1	553.2	370.5	388.9	359	511.3	488.3	477.8	469.1	499.6	350.4	519.4	398.9	411.1	366.1	398.5	378.2
264078_at	1598.9	1637.7	1587.3	1953.6	1668.3	1430.3	1492.2	1511	1511.2	1240.3	1503.9	1421.2	1523.3	1765.8	1514.5	1374.9	1493.3	1451.1
264080_at	383.1	339.9	308.8	414	478	450.8	288.1	312.8	357.2	407.9	386.6	378.9	316.5	380.2	388	442	409.9	395.2
264081_at	118	153.4	124.2	73.9	65.7	96.2	110	112	118.9	67.8	78.5	119.2	117.5	112.4	142.5	99.2	103.1	62.3
264056_at	316.2	374.1	304.9	406.3	300.6	408.7	399.6	441.8	326.4	307.2	345	382.5	423.4	452.8	358.8	432.9	357.7	423.6
264057_at	601	607.9	660.1	796.1	646.4	933.2	774.5	698	647.4	774.8	936.4	941.9	619.3	634.6	705.4	908.8	910.3	951.4
264027_at	162.1	203.3	181	179.5	194.3	176.3	220.2	204.6	234.7	149.1	145.4	163.4	221.4	139.8	115.4	173	105.1	96.8
264028_at	3273.6	2783.6	3286.4	3567.7	3600.8	3019.2	3195.7	2758.1	3002.2	4719.8	4079	4068.3	2995.3	3397	3666.2	3771.2	3647.7	4010.1
264031_at	355	504.9	534.4	550.1	473.5	602.8	430.5	493.8	461.7	522.5	603.7	562.5	337.2	386.7	399.6	475.9	576.3	595.3
264032_at	189.3	244.4	166.6	287	265.8	316	254.2	204.6	198	254.6	230.7	316.2	200.7	203.4	298.6	247.3	267.3	321.5
264037_at	1360	1321.9	1240	1037.1	1184.6	924.5	1332.4	1203.1	1173.3	1289.7	1328.1	974.3	1188.9	1089.2	1168	1110.3	1060.4	816.6
264038_at	619.6	715.2	609.8	797.5	607.3	787.6	701	620.8	703.6	807.2	769.2	933	857.9	758.9	887.3	709.6	742.9	1168.2
264040_at	267.3	215.6	209.9	209.4	259	138.9	255.5	242.3	225.9	251.9	220	249.4	291.3	245.5	278.7	233.9	230.7	237.4
264041_at	263.5	224.8	226.5	207.1	240.3	247	139.4	191.8	128.1	351.7	264.1	217.7	147.4	186.9	191.1	193.5	234.3	191.3
264042_at	244.9	243.7	163.9	170.6	263.5	158	196.3	169.4	219.3	172.5	129.5	170.6	192.5	180.1	196.9	175.6	197.6	218
264043_at	279	499.4	600.7	432.7	532.8	446.2	435.3	443.5	358.2	253.1	394.6	196.4	292.8	394.8	324.5	456.4	486.5	380.2
264044_at	747	538.7	636.6	739.6	798.5	557.3	774.3	613.7	737.4	1130.4	953.2	625.4	832.8	957.9	733.6	934.9	949.2	746
264045_at	865.6	834.7	868.7	1188.8	1258.2	1168.6	746	770	823.1	1038.3	1087	1272.9	1009.2	921	924.2	994.2	1220.3	1146.1
264048_at	1040.1	1017.9	1040.3	1051.6	993	939.5	1067.7	1156.8	1172.7	783.1	932.4	839.7	878.4	858.1	951.4	794.9	824.5	828.2
264052_at	595.7	667.7	699.3	714.5	498.1	727	957.9	939.3	958.6	517.8	475.9	496	818.2	895.1	766.5	690.6	728.4	821.6
264054_at	1862.5	1861.7	1944.3	1869.1	1983.2	1862.1	2318.2	2148.1	2097.4	2534.3	2631	2491.1	2094.9	2467.8	2798.4	2441.8	2128.1	2342.9
263995_at	369.5	409	454.3	407.3	378.6	397.3	528	437.1	476.6	440.8	499.1	539.8	538.7	549.1	501.9	461.1	442.8	489.7
263999_at	286	334	301.2	380.3	238.9	444.9	321	308.3	355.8	396.4	398.6	378.9	384.4	333.7	351.3	373.1	393.7	451.3
264000_at	1953.9	824.4	910.8	877.3	1144	756.4	1795	2009.1	1531.3	1712	1648.9	1356.1	1813.7	1466.1	1829.2	2029.4	1169.1	1348.5
264001_at	57.9	60.4	64.3	86.7	81.1	57.6	52.3	63.7	82.3	59.4	82.8	84.1	79.4	56	77.4	77.8	88.7	88.5
264002_at	926.3	854.4	928.7	1214.5	843.6	1254.1	861.7	786.1	886	843	967.6	869.6	606.4	592.2	691.4	794.5	988.2	742.1
264003_at	334.4	321.5	231.2	277.7	299.2	266.3	292.1	348.1	290.9	334.5	302.7	366	269.2	295.7	301	261.2	285.9	257.4
264004_at	1573.2	1537.5	1401.8	1402.6	1513	1652.2	1652.5	1595.9	1681.2	1949.1	1893.4	1943.9	1664.7	1781.2	1835	1760.5	1971.1	1702.1
264006_at	2074.7	2281.8	1833.5	2074.5	1884.3	1481.6	2096.3	2164.2	1966.9	2579.4	2625.6	2887.9	2843.5	2229.1	3507.9	2614.7	2617.4	3054.6
264007_at	1389.9	1082.1	899.2	1229.3	1120.9	1012	882.8	1227.3	984.6	1084.4	1024.8	1284.8	1006.6	1181.1	1367.2	1182.1	1282.3	1670.6
264008_at	657.7	538.4	524.6	552.1	566.8	442.4	624.9	542.9	607.5	526.5	480.7	640.9	716.2	581.2	672.4	475.5	467.4	487.6
264011_at	101	125.8	120.8	148	81	118.7	134.6	157.7	139.5	64.7	105.7	111.7	97.2	132.1	113.3	73.2	69.3	91.4
264012_at	252.7	262.3	279.6	325.8	299	262	184.4	206.4	203.5	191.6	166	193.3	161.6	250.7	244.2	182.3	168.7	175.7
264013_at	185	146.1	187.5	174.3	173	159.5	149.8	126.1	136.5	150.9	147.9	100.8	118.1	124.5	112.3	101.4	153.1	86.1
264014_at	913.4	1403.6	1510.8	1017.3	918.3	1038.4	1304.4	1282.5	1297.3	1100.8	967.1	569.6	645	898.6	617.7	1035.8	960.6	561
264015_at	298.8	124.8	189	253.5	260.6	172.7	195.5	172.4	156.2	230.5	228.1	227.8	204.4	145.7	293	257.5	324.9	269.9
264016_at	113.4	86.9	79.8	131.9	101.4	130.6	450.5	296.4	258.8	124.2	104.3	111.8	113.8	128.4	87.1	289.8	184.5	137.6
264017_s_at	598.7	465.3	517.6	349.9	441.1	261.2	631.6	535.2	455.7	535.7	509.1	416.5	598.9	481.8	629.6	489.6	452.3	310.2
264018_at	11138	11672.3	11960.5	14043.2	15470.9	11837.1	11216.5	10041.4	10458.1	11681.1	11150.7	10854.8	10764.2	9903.9	9549.5	11225.7	11638.9	12118.1
264019_at	1022.2	1042.8	1296.3	1001	1275.6	1331.4	865.4	855.1	990.2	1638.7	1583.8	1990.5	1268.6	1266.8	1495.3	1164.2	1194.1	1513.5
264020_at	3504.5	3497.6	3288.2	3104.9	2864.5	3327	3672	3400.2	3822.4	3131.7	2859.9	2536.3	2823.8	3237.6	2745.3	3053.1	3170.5	2945.8
264023_at	445.2	540.6	497.5	374.5	474	390.5	491.1	446.3	546.5	394.5	501.6	322.8	440.5	415.4	390.5	479.3	549.5	370.1
264024_at	155.1	133.2	162.8	172.5	173.4	145.4	199	151.6	183.6	169.3	139.4	159.8	181.4	168.2	191.5	181.8	164.3	262.3
264025_at	270.3	249.4	356.2	192.4	210	210.2	250.4	239.4	242.4	191.8	181.6	165.9	184.7	160.6	257.4	144.5	221.5	128
263972_at	140.9	126.2	139.8	200.5	150.4	142	187.1	195	159.7	157.9	151.2	155.7	204.4	230.3	271.1	253.5	227.2	214.8
263973_at	734.8	941.5	850.9	1146.8	758.5	987.9	872.8	770.7	1001.5	905.1	744.1	521.5	510.4	392.5	466.8	912.9	723.8	445.2
263975_at	422.2	582.7	515.9	509.5	390.1	552	564.2	618.9	504.7	336.1	335.6	318.2	337.7	344.6	327	406.6	381.3	249.3
263976_at	229.4	179	234.9	275.6	172.8	241.1	209.4	176.6	258.2	263.5	173.7	228.9	208.7	358.2	250.4	207.4	221.1	125.7
263978_at	2389.4	2169.1	2288.4	2590.9	2518.9	2664.1	2453.1	2142.2	2241.4	2955.9	2602.8	2894.9	2286.8	2308.7	2747.4	2815.7	2369.9	2978.2
263979_at	3144.7	3560.6	3735.5	2923.6	2976.3	2758.7	2723.4	3126.9	3323.8	2077.5	2379.1	1806	1891	1838.1	2090.3	1942.1	2335.7	2225
263980_at	1819	1699.5	1693.2	2251.6	2114.5	2371.8	1456.3	1660.6	1733.5	1969.8	1924.2	2012.2	1420.4	1449.6	1353.9	1919.7	1726.9	2116.5
263984_at	337.9	231.2	307	294.8	320.3	325.7	295.5	223	245	326.6	316	443.2	347.8	260.2	292.6	280.4	214.6	378
263985_at	1290.8	965.7	1032.6	987.8	1060.1	1101.3	786.1	807.2	776.1	1430.1	1520.9	1701.8	1191.9	1390.3	1719.9	1335.6	1426.1	1934
263986_at	1069.7	879.3	1012.1	672.1	619.8	710.3	908.3	970	1056.7	1089.8	963	1216.2	1922.6	1639.9	1887	1075.3	1218	1213.4
263987_at	4039	2841.6	2875.2	3539.5	3475.1	3565.7	3592.9	3706.8	2897.2	4074.7	4512.4	3329.3	4823.6	4241.5	4751.6	4256	2918.6	4228.5
263989_at	805.6	801.5	746.9	742.4	602.5	824.8	731.5	882.9	700.2	806.2	688	985.1	916	913.8	873.6	801.9	865.1	982.1
263990_at	712.2	620.6	575.2	659.2	717.9	687.1	679.9	607.9	633.8	790.6	743.8	514.2	710.5	581.8	559.1	765.9	563.4	557.9
263936_at	192.9	165	154.3	255.6	117.2	238	177.9	190.7	252	129.2	251.9	247.9	176.1	166.7	256.8	179.7	240	201.9
263938_at	404.9	497.7	409.9	497.8	479.8	434.9	441.4	381.6	370.7	599.9	575.5	558.6	533.5	489.6	482.6	465.3	555.7	762.6
263939_at	455.1	460.3	538	548	548.4	526	518.4	512.5	619.5	417.1	421.6	409.2	329.9	342.9	302.8	469.9	512	362.3
263962_at	312.3	344.1	303.1	303.8	223.6	282.5	365.5	369	331.3	251.5	235.2	282.5	303.6	335.7	350.7	230.4	344.9	224.1
263928_at	392.3	308.5	291.8	342.5	324.5	361.4	274.9	275.4	317.2	429.4	563.5	540.4	436.9	365.3	473.5	447.6	468.8	481.5
263929_at	565.3	681.6	563.4	534.2	592.9	663.9	621.4	630.1	599	618	655	687.4	635.2	614.8	649.4	696.2	664.5	722.7
263930_at	697.4	560.1	523.5	384.4	460	517.7	593.5	670.2	623.2	621	588.6	625.6	633.4	863.6	729.9	545.4	564.4	663.9
263931_at	183	112.9	106.3	50.9	121.8	161.4	104.9	135	113	119.7	149.4	231.7	258.6	353.6	405.2	171.2	184.6	298.5
263900_at	436.3	500.4	425.6	259.8	318.3	287.8	492.5	451.3	505	322.3	336.6	404.5	698.2	492.9	553.6	276.7	370.5	416.3
263901_at	1185.5	1102.6	877.2	804.4	914.8	892.4	1040.8	1180.2	866.1	1017.7	1622.4	1462.5	1881.3	1482.2	1543.7	1352.3	1461.1	1727.1
263902_at	565.2	654.1	643	722.9	717	664.9	538.2	660.7	640.2	718.5	561.9	446.9	334.7	339.1	279	584.6	609.5	360
263904_at	380.6	427	330	552.4	408.5	390.5	502.9	530	476.3	413.2	462.2	507.8	724.1	580.7	633.7	570.6	657.2	601.2
263906_at	1638.1	1773.4	1761.2	1741.3	1986.3	1982.7	1548.7	1622	1614.3	1576.8	1579.1	1347.2	1333.6	1382	1162.3	1477	1689.8	1463.1
263908_at	399.9	315.4	441.1	313.9	305.3	318.3	456.9	418.2	316.3	250.3	291.6	252.2	378.6	384.4	373.6	216.8	219.6	247.5
263909_at	219.8	195.8	215.1	132.5	117.6	151.5	177.8	167.8	128.3	183.5	167.7	141	190.8	223.6	251.5	129.1	112	134.6
263912_at	1099.7	1284.9	1234.8	1508.2	1543.4	1361.9	1075.4	1188.2	1162.2	1464	1946.3	1752.3	1479.9	1620.3	1835.6	1603.9	1517.1	1779.2
263913_at	454.2	484.9	511.1	366.2	332.9	389	490.2	459.4	464.8	437.2	440.5	466	460.3	363.2	501.7	304.3	382.7	394.4
263914_at	207.7	158.4	128.5	221	159.6	192.7	180	134	144.2	179.9	135.7	127.7	172.6	128.6	156.6	148.5	132.5	175.9
263915_at	366.4	356.2	389.5	360.5	279.3	269.4	407.5	369.8	406.6	420	433.5	468.1	385.1	439.4	449.7	277	224.8	397.6
263919_at	153.6	124.8	66.4	133	129	151.5	109.5	131.2	95.2	141.5	115.3	187.3	118.9	169.7	214	165	110.8	161.7
263920_at	388.4	555.4	539	471.1	512.5	463.8	455.5	488.8	375	490.7	546.6	538.6	404.7	387.4	449.6	468	407.1	522.5
263921_at	2027.7	2058.9	1746.3	1608	1954.1	1788.4	2275.8	1872	1828.3	1744.8	1994.4	1823.9	2214.8	1837.7	2000.7	1823.6	2046.7	2013.8
263922_s_at	1716.3	1869.1	1878	1882.6	1982.4	1468.6	1811.3	1950.1	1869.7	1878.2	2082.3	1979.5	1616.2	2013.3	1912.9	2069.7	1906.2	1657.8
263924_at	9076	10087.4	8035.8	8689.4	9204.6	9099.9	9176.9	10380.7	10475.8	8532.3	8510	7453.8	8085.1	8904.1	7540.9	10109.5	8290.5	8538.2
263897_at	188.8	177.5	185.4	306	218.9	349.3	205.8	219.1	156.9	420	316.6	450.4	333.3	316	347	326.6	336	484.2
263898_at	246	265.5	277.1	215.3	238.2	255.3	275	338	369.6	426.6	310.8	282.2	307.8	378.6	434.1	298.5	313.6	334.1
263870_at	196.6	190.5	155.6	68.5	98.4	118.6	188.5	243.4	161.3	108.1	168.5	196.6	244.7	232.6	282.5	164.7	151.6	195.1
263873_at	1952.2	2740.6	2652.5	2840	2907.1	2970.4	2797.5	2723.2	2917.2	2024.6	2203.6	1706.8	1941.2	2062.1	1656.8	2385.6	2177.7	1939.8
263874_at	7332.8	7364.4	8250	7712.7	8545	8414.9	7895.8	7822.2	7311.4	6876.7	6665.4	6262.5	7950.6	6940.8	6735.4	6979.3	7129.1	7120.7
263875_at	1591.7	1266.3	1163.9	882.9	1288.2	1222.7	991	1006.2	955	1861.5	1816.4	2133.2	1844	1960.4	2309	1230.3	1549	2006.2
263876_at	139.2	120.6	134.9	119.7	116.7	130.3	93.7	75	119.4	106.8	125.5	151.3	120.9	98.9	95.5	83.2	82.1	119.1
263878_s_at	452.1	457.2	460.8	500.5	498.8	338.4	442.1	419.2	444	548	545.5	425.9	471.5	454.5	490.6	720.7	683.3	507
263880_at	3054.3	3590.3	3417.4	3619.8	3223.7	3406.7	2528.4	2771	2622.8	2736.1	3577.1	2860.9	3115	2589.7	2935.2	2995.9	2853.4	3044.7
263882_at	1156.6	1360.7	1168.6	1099.4	959.9	1146.3	1224.1	1177.2	1194.3	965.4	888.3	818.8	748.9	898.3	707.2	1011.2	853.8	702
263883_at	88.8	90.2	101.9	118.1	56.4	123.3	122.7	159.4	113.9	126.6	109	127.5	114.3	102.7	102.1	94.4	159.4	126.2
263886_at	222.8	205.2	230.4	165.3	160.2	149.6	188.8	172.4	233.5	180.1	128.1	147.1	205.1	172.1	210.1	137.9	152.1	211
263891_at	624	697.4	691.3	861	684.8	733.3	755.8	675	684.9	866	817.8	707.6	672.1	844.7	738.6	841.8	866.2	738.7
263865_at	1714	1601.6	1725.4	1237.3	1216.1	1433.2	1414.7	1514.2	1526.5	1425.2	1603.8	1635.5	2152.4	1875.8	2074.1	1263.8	1666.1	1576.4
263867_at	9079	9319.9	9497.1	10581.2	9939.3	11591.1	9958.9	9188.2	11218.9	7998.7	8142.2	7689.5	6831.1	6783.2	6852	7160.5	8413.7	6100.4
263838_at	6058.9	7123.1	6984.6	6945.9	7663.8	7668.4	7552.6	6904.5	7455.5	7083.1	7170.5	5869.4	7893.2	6057.1	7108	6802.3	6975.8	7725.2
263839_at	435.3	390	385.6	392.5	491.1	525	460	428.4	409.1	456.7	464.5	651.6	644.6	501.5	470.8	399.4	475.8	591.3
263840_at	2420	2790.1	2621.4	3000.7	2802.9	2778	2237.9	2260.5	2395.8	2480.1	2373.4	2292.4	1420.1	1714.3	1522.1	2113.4	2000	1720.7
263841_at	1421.6	2034.9	1765.5	1683.4	1743.4	1871.2	1995.2	1980.5	1941.4	1676.4	1832	1495	1618.6	1834.6	1787.1	1966.5	2237	2049.4
263842_at	2320.9	2086.8	2105.1	2474.6	2698.5	2234.1	2061.6	1979	1886.6	2825.5	2451.9	2418.9	2328.1	2377.9	1999.1	2104.5	1506.2	1721.2
263843_at	309.6	330.4	256.8	388.6	369.8	439.7	332	333.1	389.2	329.1	258.5	252.8	263.4	258.8	216.7	358	333.2	295.8
263844_at	1606.1	1837.5	1851.9	2271	1747.4	2042.5	1788	1837.8	1805.9	1957.7	1752.7	1940.9	1393.9	1432.7	1434.3	1837.7	1719.8	1944.9
263845_at	847.7	1100.2	1015.6	909.7	1068.8	1065.5	1416	1546.8	1342.9	755.8	1092.1	862.6	1009.2	1317.4	1144.6	1108	978.5	1113.8
263846_at	1368.2	1390.2	1159.9	1891	1543.8	1512.4	1338.6	1252.3	961.8	1442.5	1458.6	1187.9	1021.8	1143.3	963.9	1356	1372.1	1222.8
263847_at	100.5	136.8	123.8	109.8	112.2	154.7	124.2	130.4	143.2	196.7	142.3	242.2	268.6	221.7	312.7	203.6	186.5	312
263852_at	1338.5	146.4	87.1	257.1	157.6	147.3	700.2	487.3	423.9	767	532.9	709	554.5	834.8	787.9	597.9	370.5	293.1
263854_at	260.4	73.4	77.1	163.9	82.6	119.6	84.9	147.5	148	161	115.7	289.8	175.9	155.4	131.2	148.8	133	115
263856_at	1512.8	1276.9	1036.4	1014.2	1201.8	1085.3	1281.5	1520.5	1077.6	1447.3	1518	1013.9	1495.9	1562.3	1613.7	1701.3	1468.6	1640.7
263859_at	1145.9	1423.1	1123.5	1619.2	1793.1	1449.4	1197.3	1293.6	1324.5	1314.3	1401.3	883	837.4	720.6	666.5	1427.3	1302.4	976.3
263862_at	253.6	368.8	307.4	320.5	245.1	230.8	286.4	331.2	315.4	290	323.7	364.4	465.7	327.7	373	311.8	326.1	335.8
263863_at	291.2	296.2	305.5	475.3	298.8	287.9	225.5	276.6	265.8	265.4	335.9	244.5	294.1	286.5	258.1	333.5	324.4	310.4
263864_at	699	816.3	837.8	1048.7	829.3	1318.5	1060.8	970.3	1046.1	661.2	711.8	641.6	634.5	576.9	367.9	836.8	703.6	531.4
263806_at	231.2	188.6	209	229.5	175.5	176.5	224.5	229.7	192.2	154.2	181.5	192.2	297.5	222.9	166.9	220.8	226.7	239.2
263807_at	1862.2	1570.8	1601.2	1696.9	1472.7	1670.4	1788.7	2130.5	2196	1538.2	1413.2	1502.3	1587.9	2247.1	1703.8	1518.9	1559.8	1989.3
263808_at	223.7	289.1	294.6	268.2	280.9	389.9	298.8	210.9	300.2	353.8	377.2	455.4	352.9	291.1	266.4	327.7	321.5	374.5
263809_at	659.6	483.5	394.8	591.8	477.2	633.2	358.8	387.2	326.5	475.2	542.5	870	569.4	644.3	691.9	455.9	370.1	719.6
263810_at	2701.7	2559.2	2093.2	2776.4	3270.6	2077.7	2253	2768.5	2831.7	2837.5	3027.6	2588.7	2066	1813	2260.3	2958	2982.8	2591.9
263811_at	1047.3	847.4	753	737.6	589.5	741.7	767.6	876.1	765.3	904.6	897.6	1025.7	1110.7	1357.9	1311.5	827.6	1074.5	984.1
263821_s_at	16580.1	17366.2	18233	17918.3	20882.6	15847.5	17930.3	17262.3	16486.7	13870.2	13900.2	12274.6	13345.7	11004.6	10770.8	14739.4	13584.7	11485.8
263824_at	1390	1619.9	1868	1951.6	2267.9	2112.3	1919.6	1900.3	2137.2	1284.8	1360.5	962.2	1138.2	1209.2	1055.7	1634.1	1399.5	1187.4
263826_at	400.7	402.3	410.8	582	479.8	461.2	329.2	408.9	437.7	467	428.6	420.9	443.3	408.5	442.6	472.3	389	529.4
263827_at	312.7	293	272.8	291.6	399.6	344.6	237.5	331.5	252.7	388.4	375.5	470	322.5	368.4	457.5	397.7	436.2	469.7
263829_at	368.7	419.5	394.7	458.4	459.5	422.8	513.6	555.2	471.7	283.5	394.8	249	310.7	255.9	317.8	412.4	506.2	377.3
263831_at	1413.1	1607.7	1521.7	2128	2171.7	1975.7	1059.8	1405.1	1256.7	1773.7	2207	2140.3	1488.9	1253.8	1552.8	1500.7	1457.9	1493.8
263834_at	381.2	403	421.9	477.6	560.3	255.4	392	455	318.4	480.5	526.9	415.6	412.4	361.1	347.3	505.9	468.4	342.1
263835_at	1968.2	1993.5	1511.4	2170.7	2139.8	2232	1990.5	1973.9	2123.6	1609.9	1474	1364.1	1503.5	1577.1	1401.4	1708.6	1550.5	1547.2
263802_at	660.8	935.2	1024.3	853.2	889.7	866	1028.4	1095.9	1023.5	823.8	859.2	558.9	705.5	660.8	688.1	831.2	767.2	501.6
263804_at	743.5	329.3	288.1	334.5	345.8	462.2	451.7	381.1	433.5	753.9	797.8	988	749.9	854.9	900.9	705.4	642.8	827.1
263805_at	854.2	1193.4	1036.8	1431.1	1118.6	1191.9	1076.1	990.7	1178.9	720.2	570.9	239.2	346.7	459.6	213.4	781.8	721	265.4
263774_at	581.6	543.5	519.3	541.4	517.8	553.7	612	652.8	585.5	558.8	565.6	491.9	696.4	676	623.2	571.4	590.5	547.6
263776_s_at	1003.1	243.7	252.3	483.4	276.5	363.2	440.1	355.8	418.1	1086.6	1139.6	1120.6	1161.1	1001.4	1398.3	698.7	673.7	793.5
263777_at	489.8	317.1	331.4	547.8	407.9	514.1	404.6	415.7	413.5	511.1	542	730.1	491.4	699.6	772.4	642.2	548.8	783.3
[truncated: 10,111 more rows]
